# Supplementary material
Source: publisher figshare collection journal article supplement (https://gsajournals.figshare.com/ndownloader/files/23204444)

Figure S3: Q-Q plots of p-values from GWAS for all available traits accounting for neither structure nor kinship, only for structure, only for kinship or for both kinship and structure.

Q-Q plots of p-values from GWAS (Genome-Wide-Association-Study) for all available traits (one page for each trait) accounting for neither structure nor kinship (top-left), accounting only for structure (top-right), accounting only for kinship (bottom-left) or accounting for both kinship and structure (bottom-right). The blue horizontal line indicates the 10% q-value threshold, if absent the q-value is greater than 10% for all markers. The identity line is in red. A full description of the traits is available in File S1.

# trait: ADF\_04\_me17

No accounting for kinship or structure

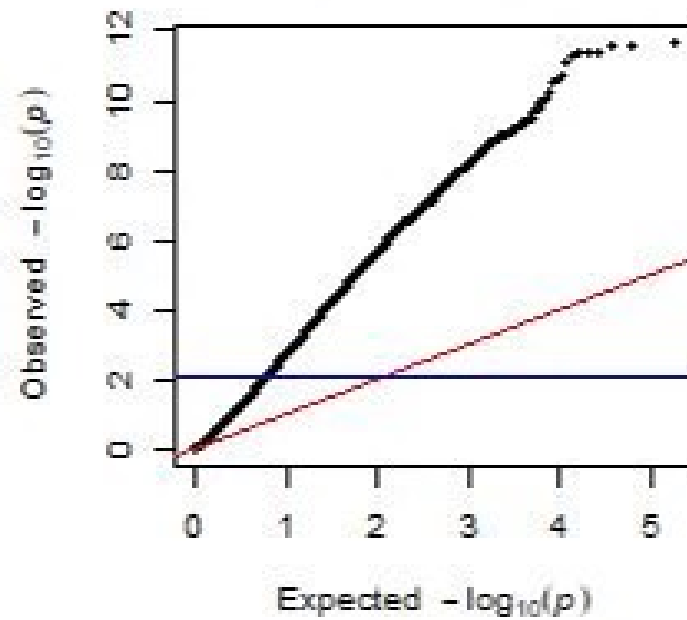

Accounting only for structure

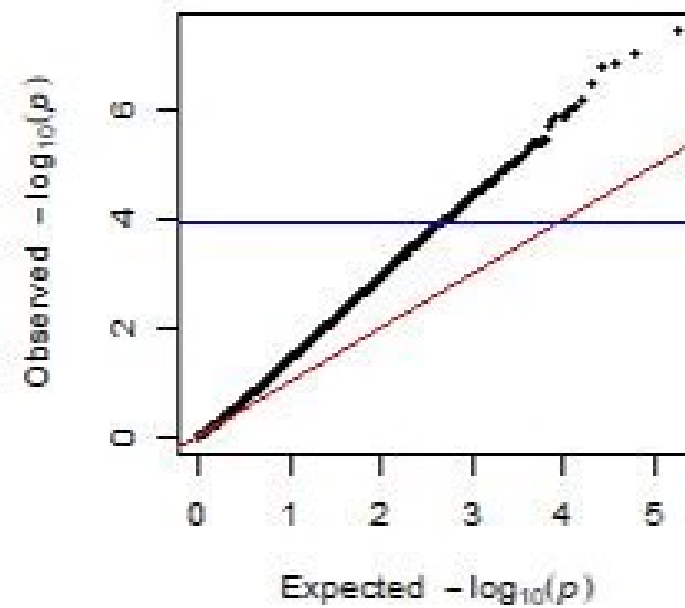

Accounting only for kinship

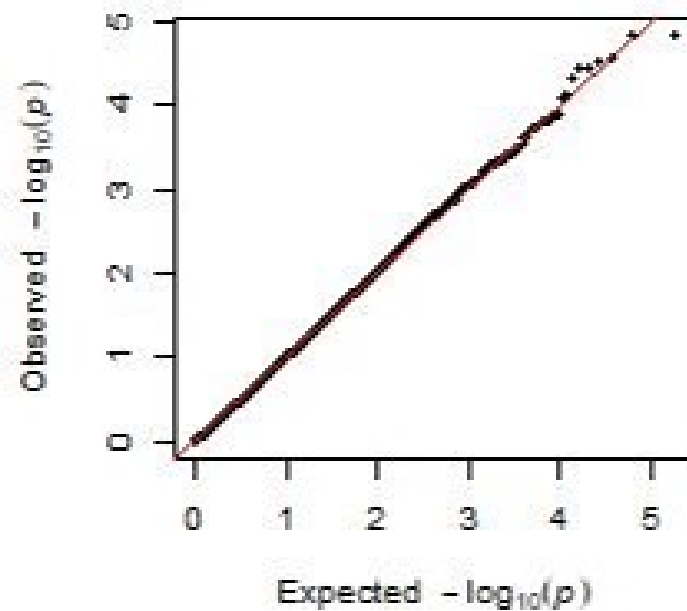

Accounting for kinship and structure

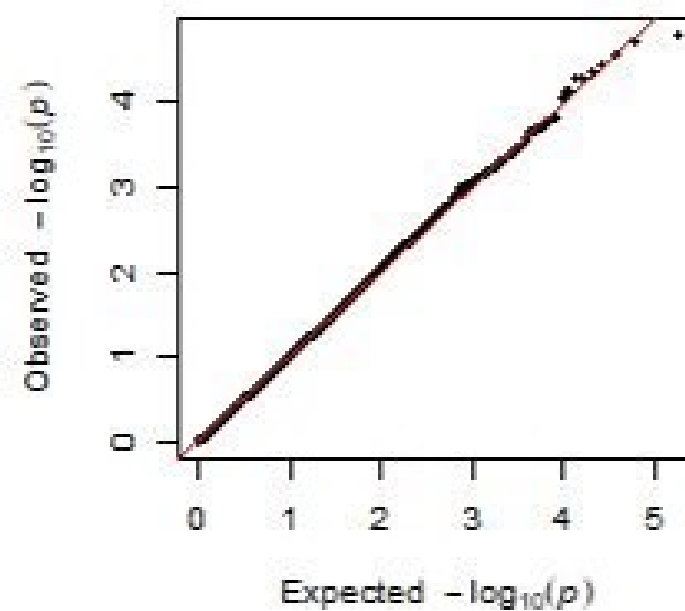

# trait: ADF\_10\_me17

No accounting for kinship or structure

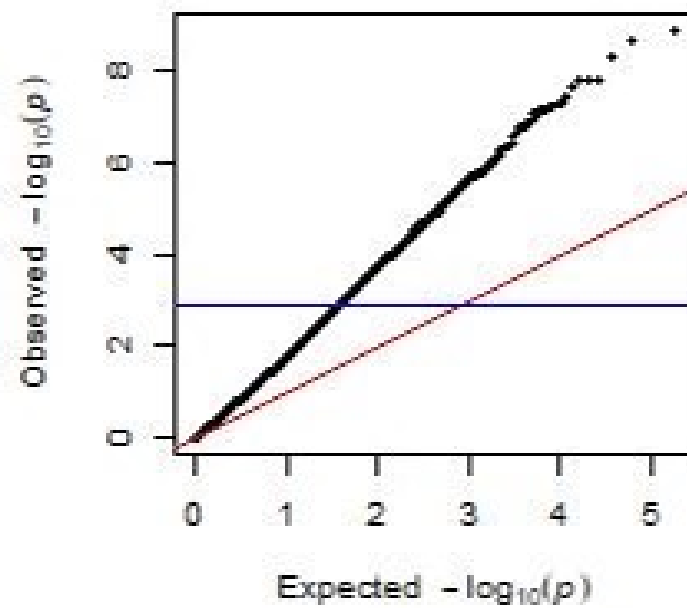

Accounting only for structure

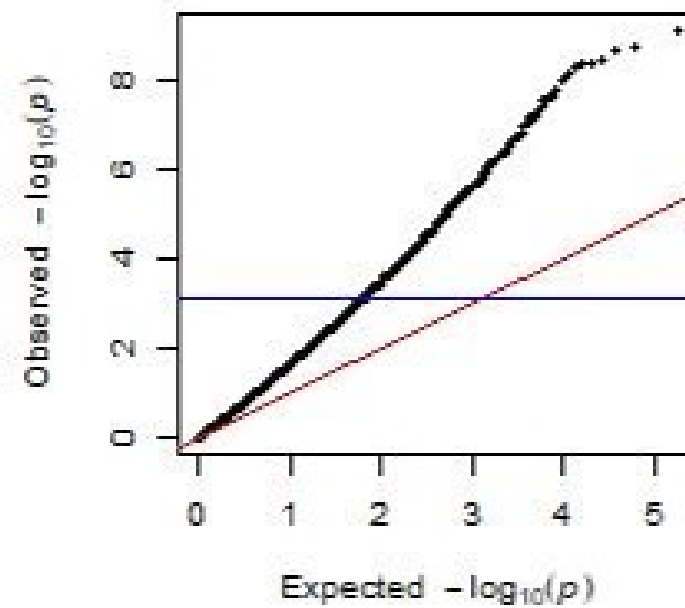

Accounting only for kinship

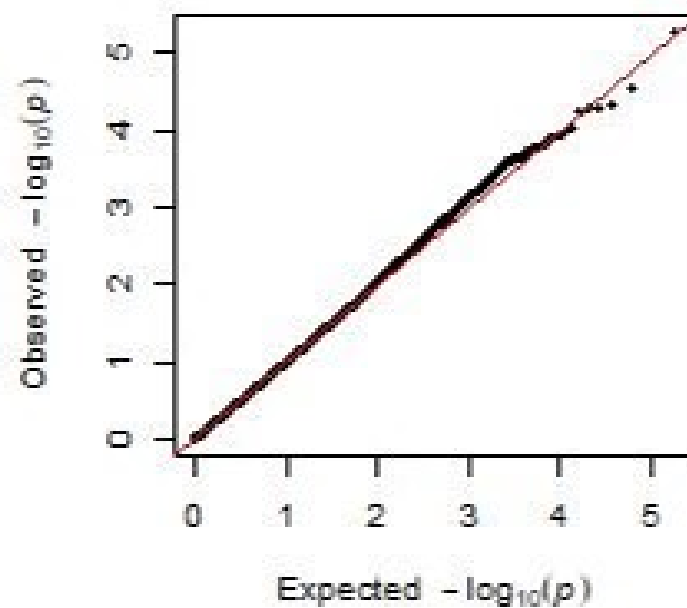

Accounting for kinship and structure

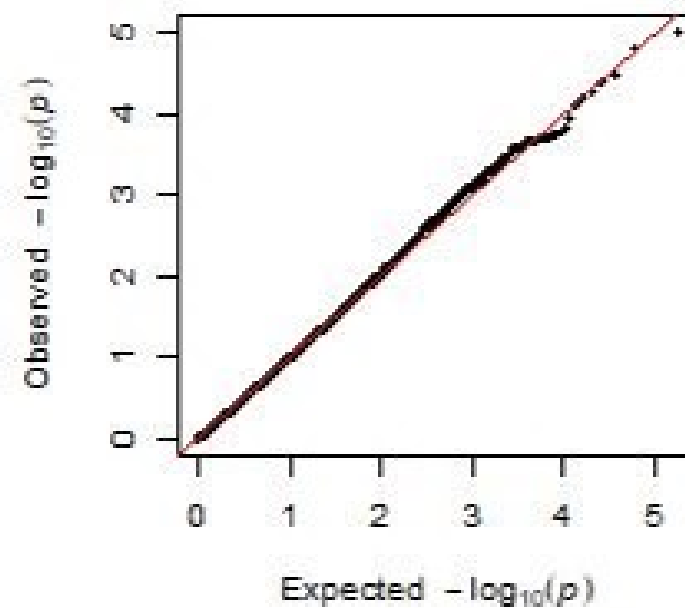

# trait: ADF\_avg

No accounting for kinship or structure

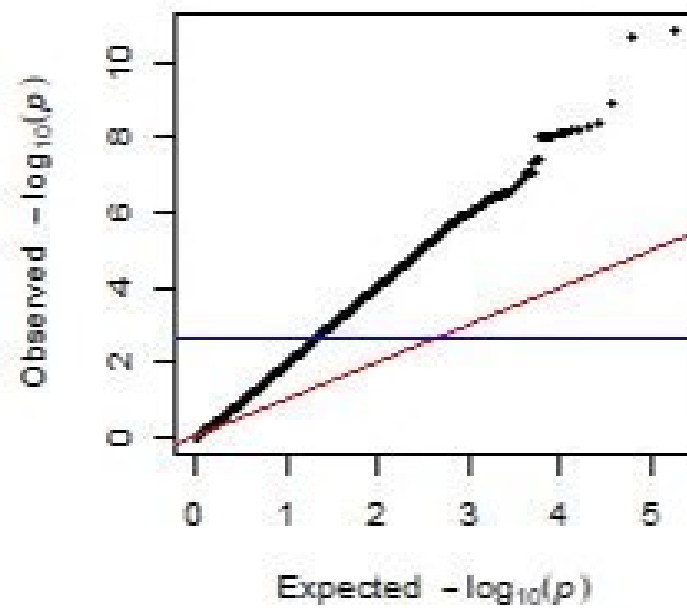

Accounting only for structure

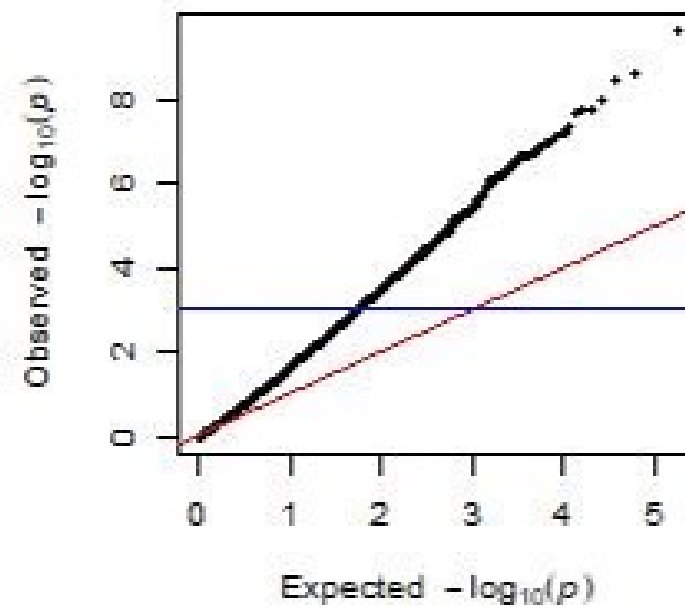

Accounting only for kinship

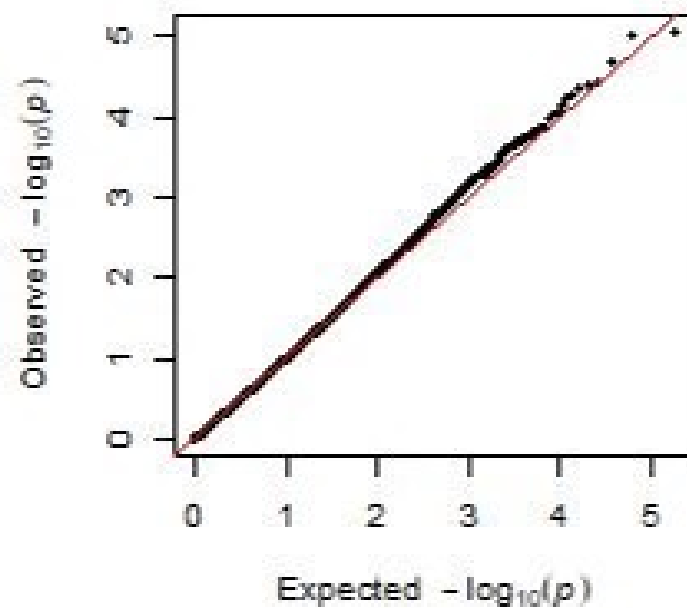

Accounting for kinship and structure

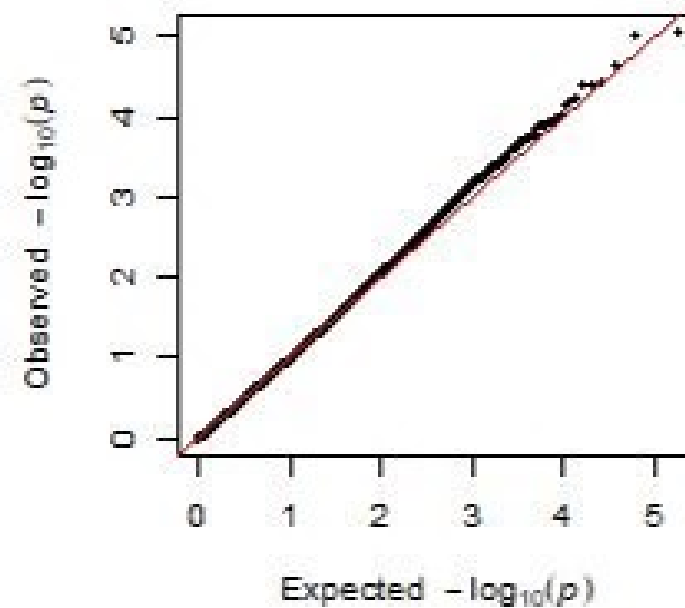

# trait: ADL\_04\_me17

No accounting for kinship or structure

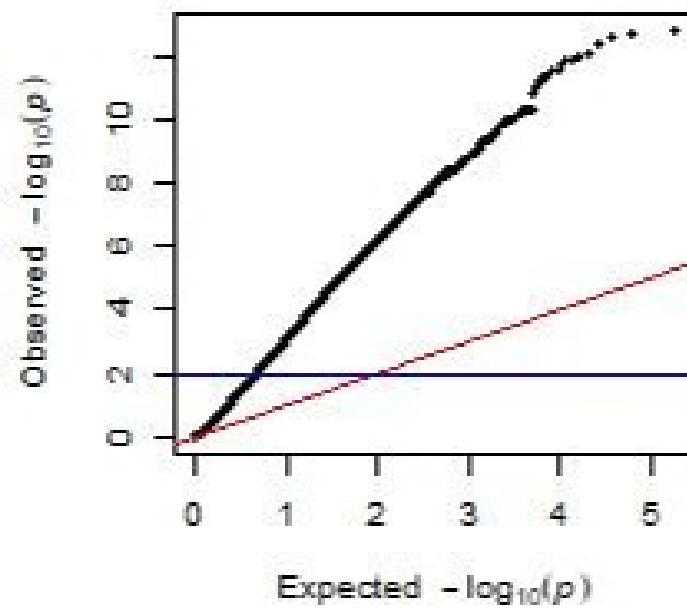

Accounting only for structure

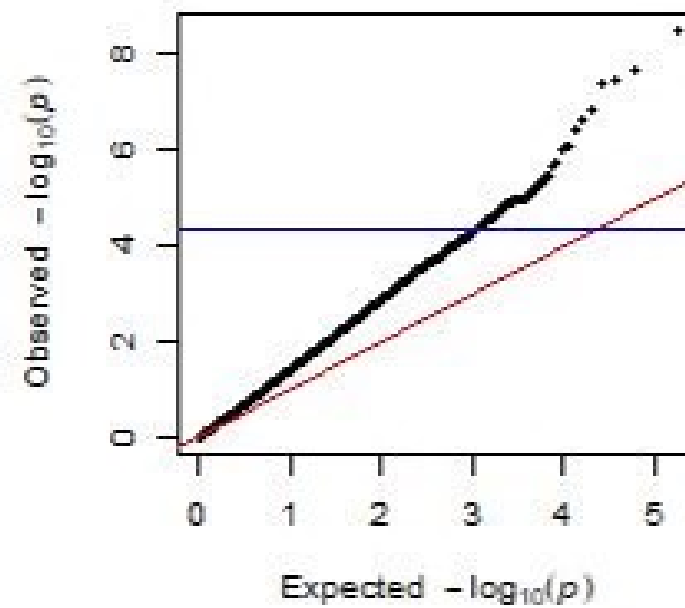

Accounting only for kinship

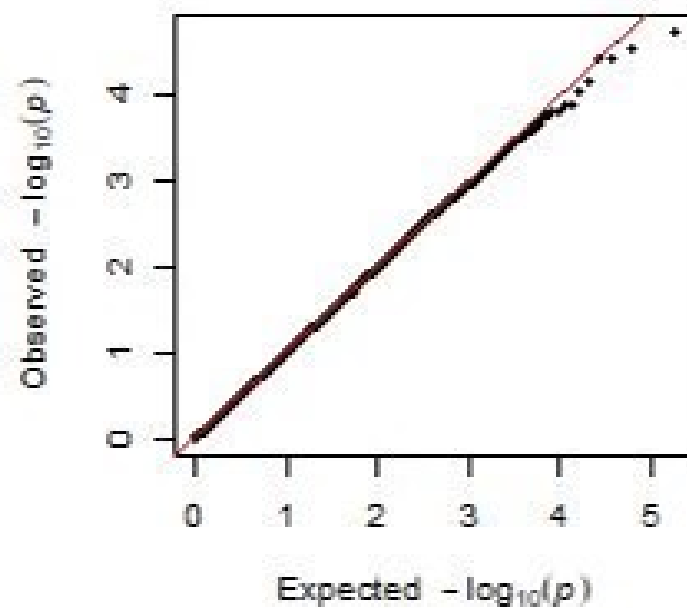

Accounting for kinship and structure

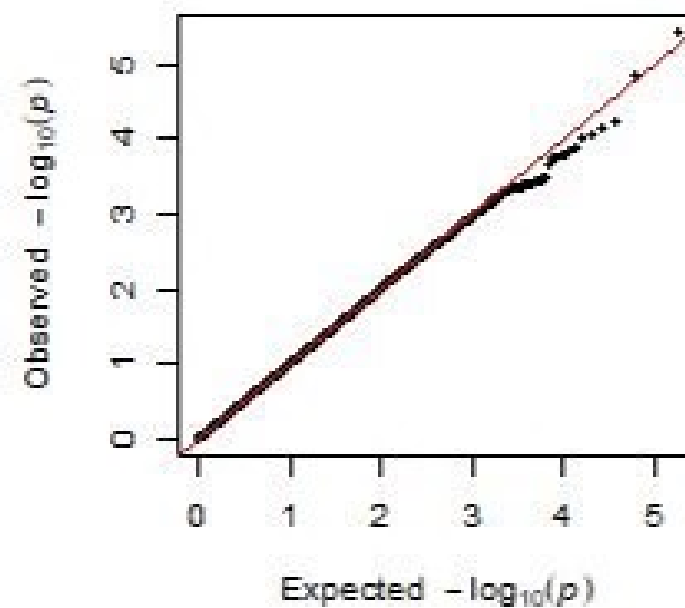

# trait: ADL\_10\_me17

No accounting for kinship or structure

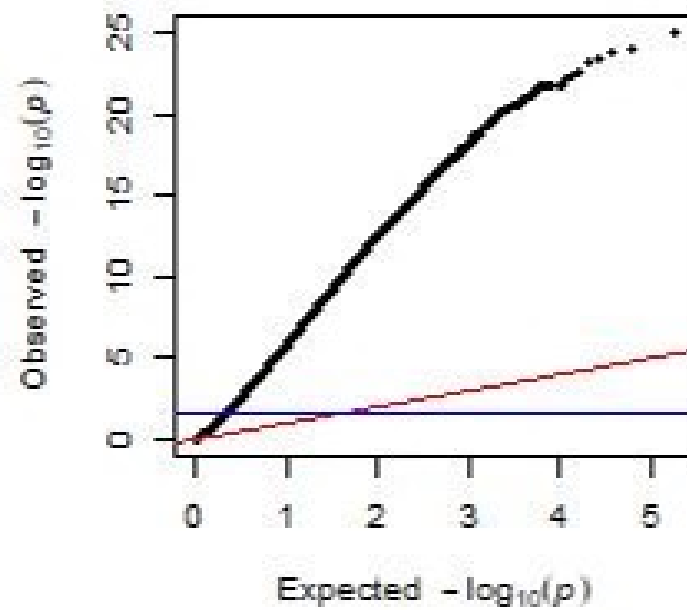

Accounting only for structure

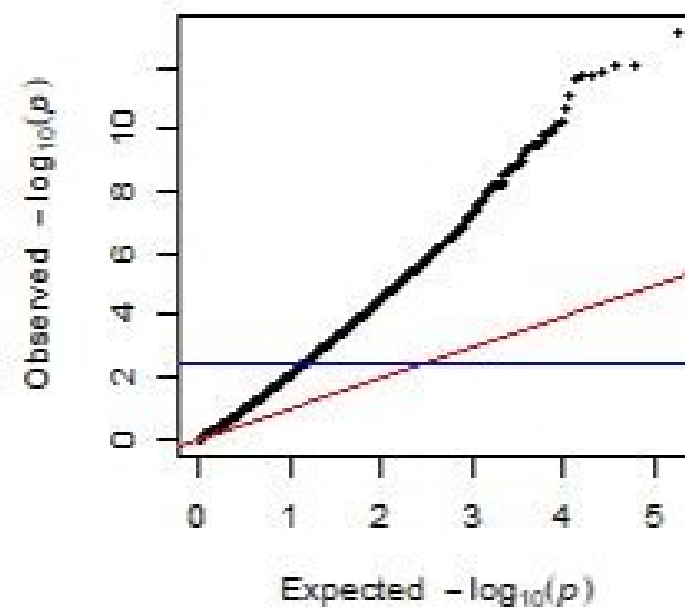

Accounting only for kinship

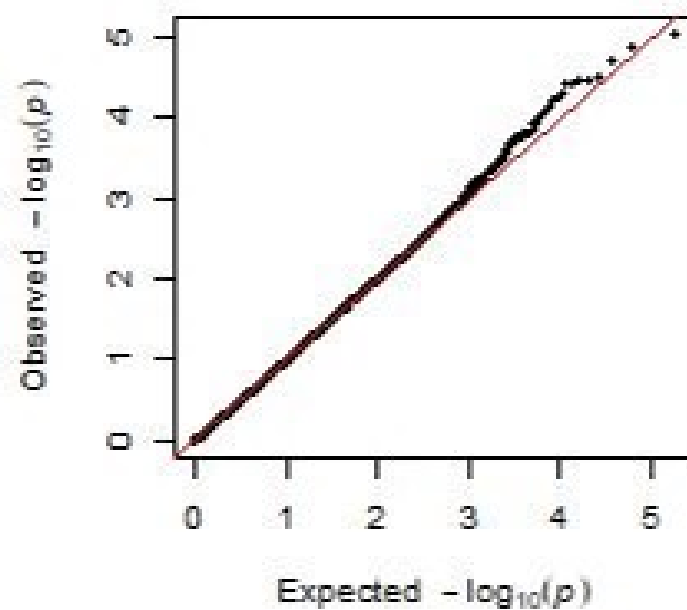

Accounting for kinship and structure

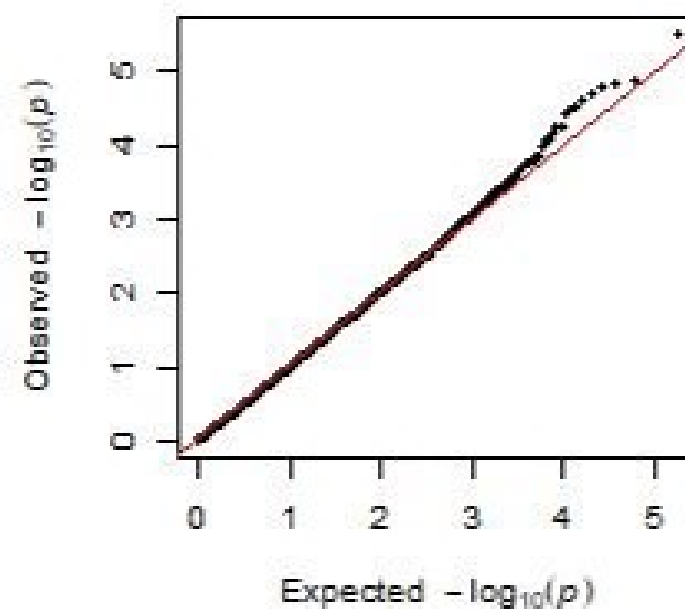

# trait: ADL\_avg

No accounting for kinship or structure

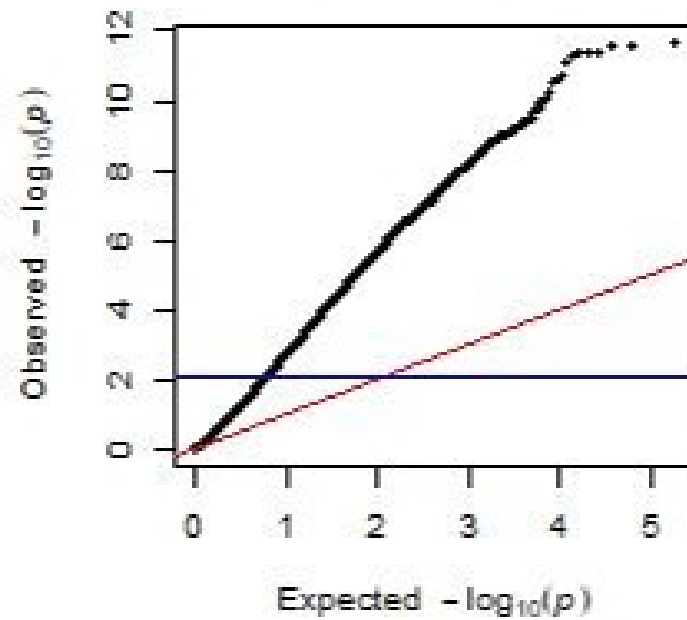

Accounting only for structure



Accounting only for kinship



Accounting for kinship and structure



# trait: AGR\_me17

No accounting for kinship or structure

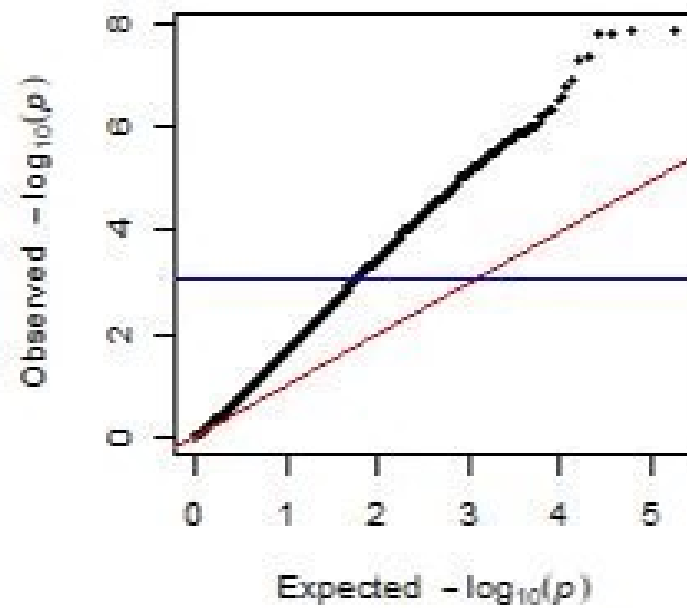

Accounting only for structure

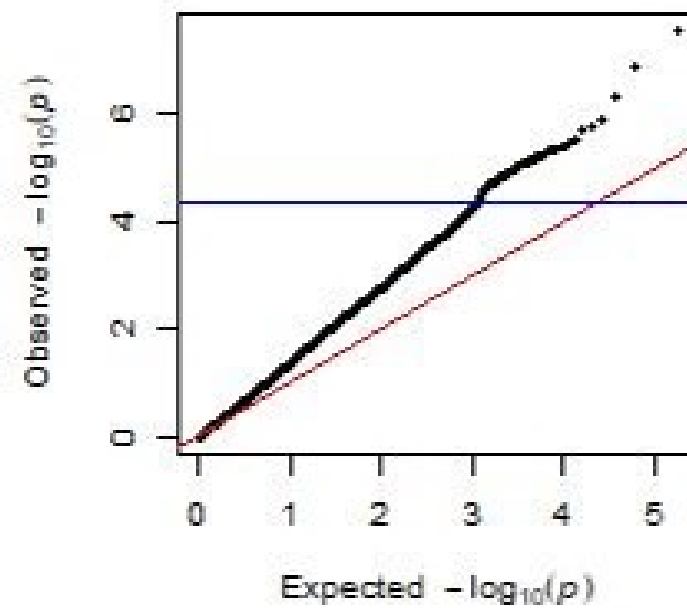

Accounting only for kinship

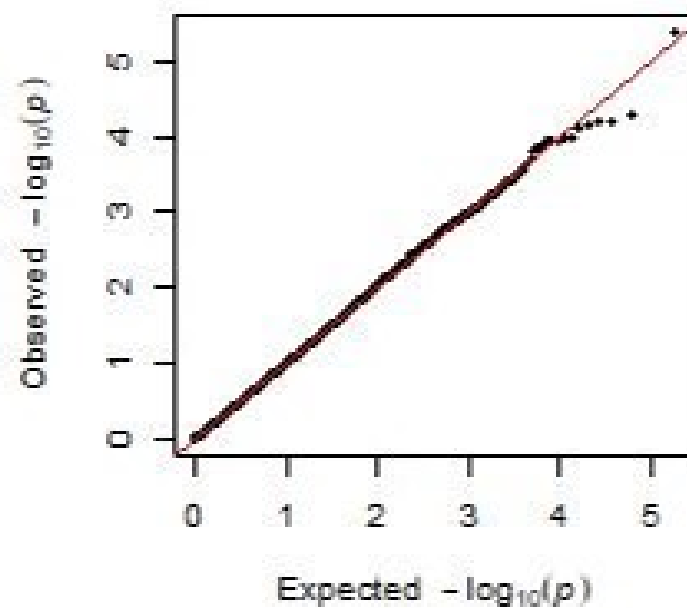

Accounting for kinship and structure

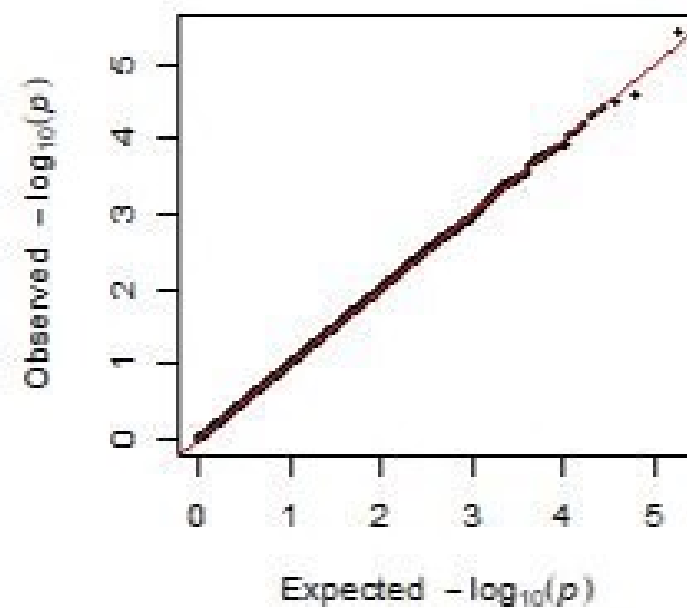



# trait: AGR\_po17

No accounting for kinship or structure

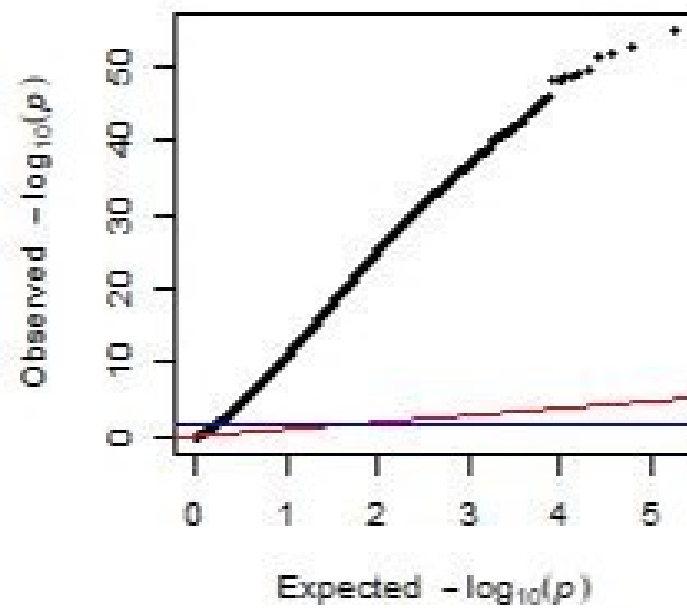

Accounting only for structure

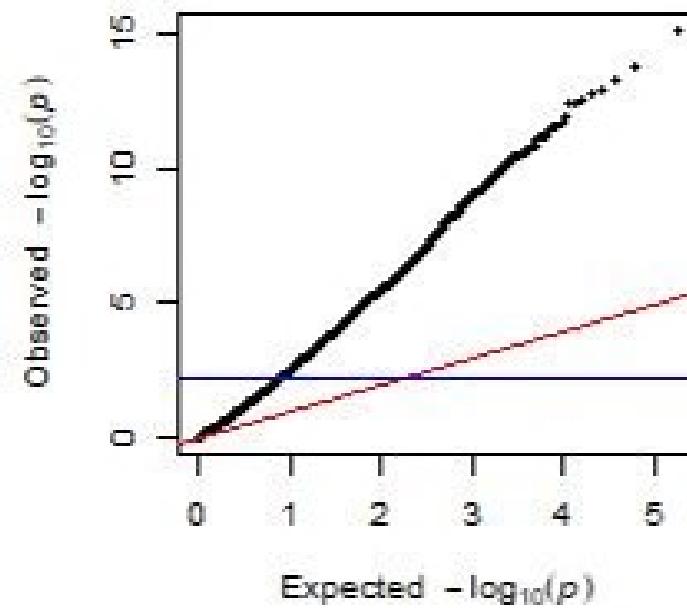

Accounting only for kinship

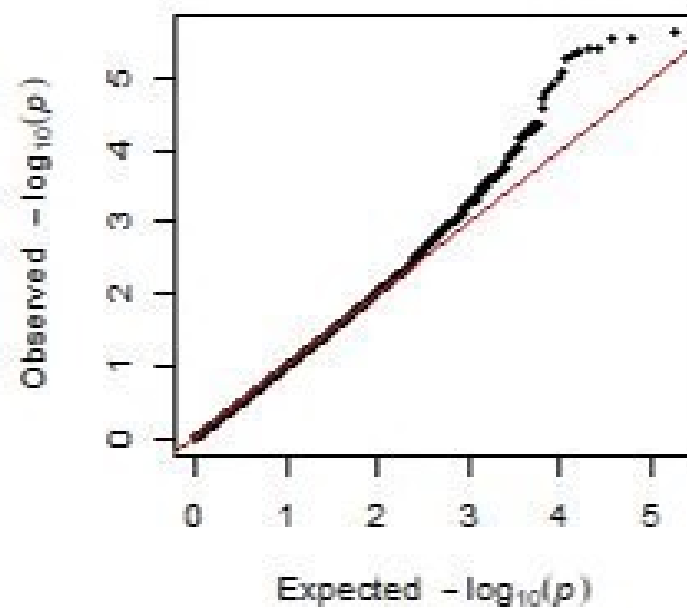

Accounting for kinship and structure

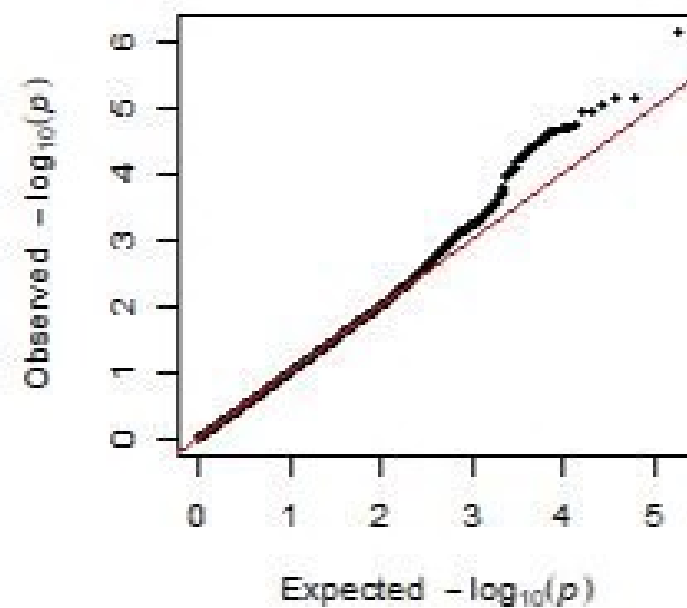

# trait: AHD\_avg

No accounting for kinship or structure

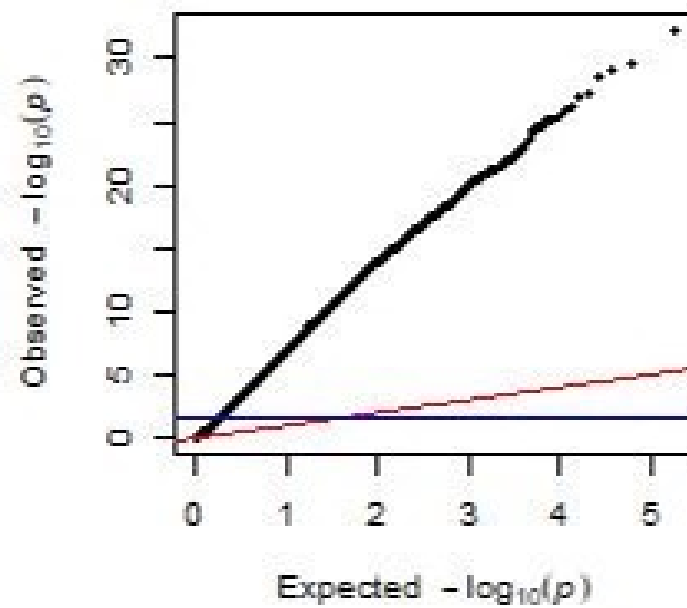

Accounting only for structure

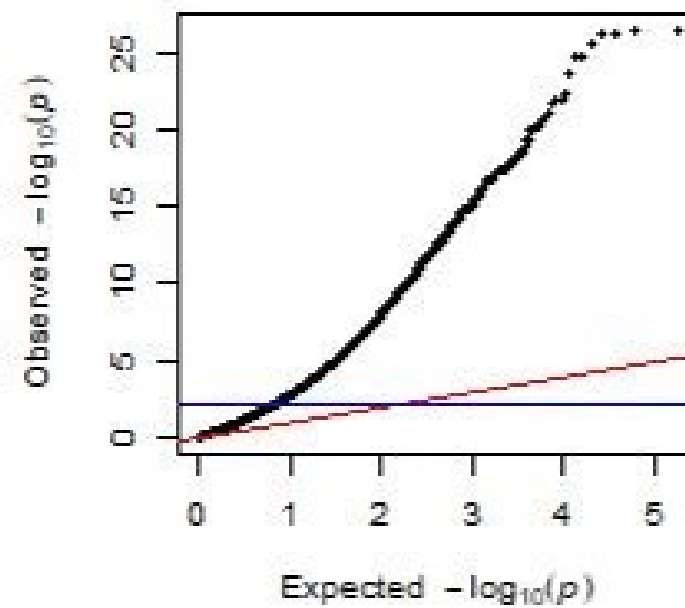

Accounting only for kinship

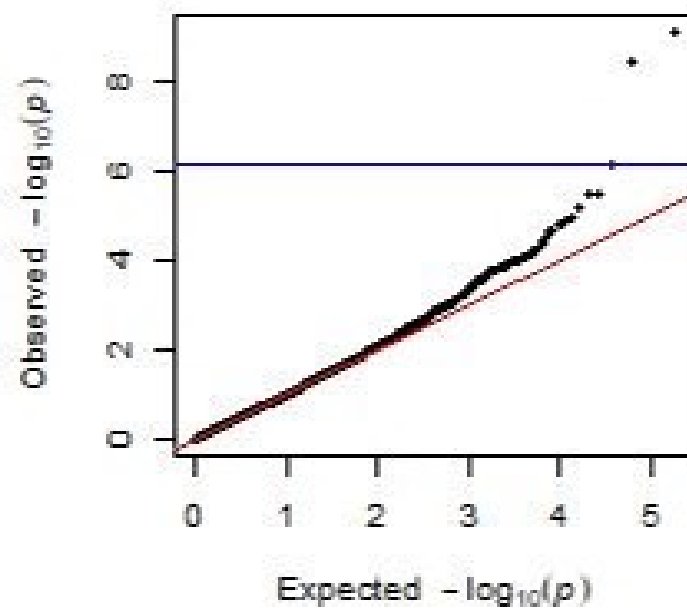

Accounting for kinship and structure

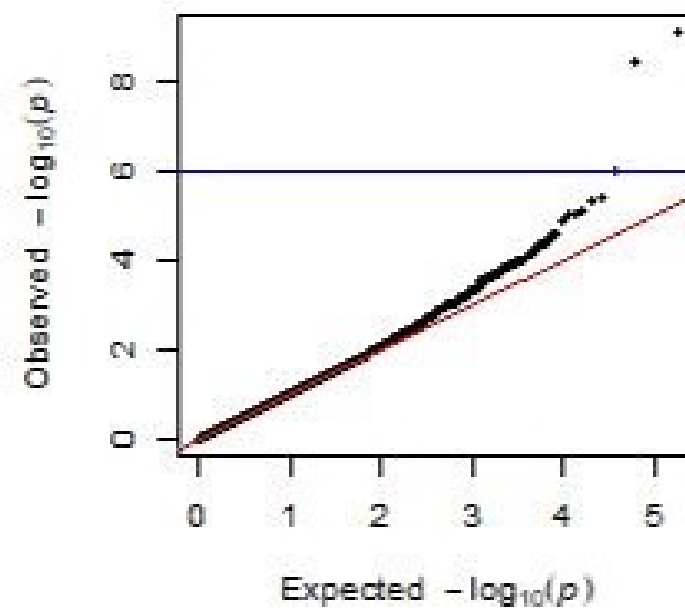

# trait: AHD\_lu16

No accounting for kinship or structure

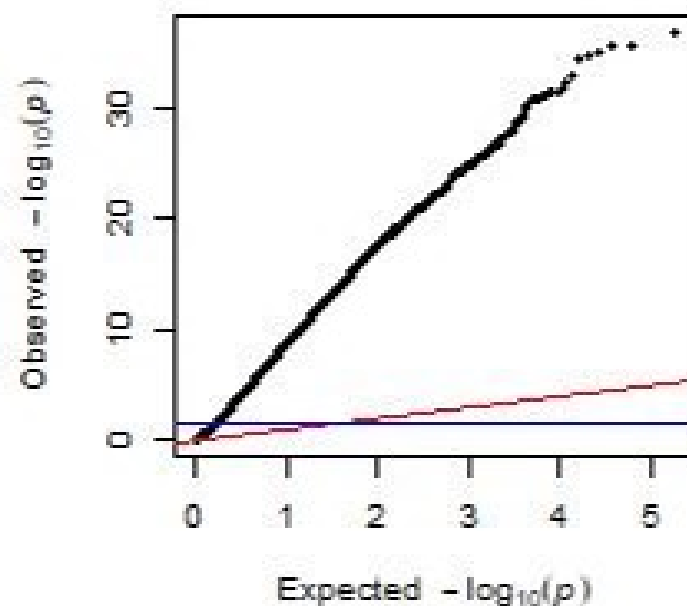

Accounting only for structure

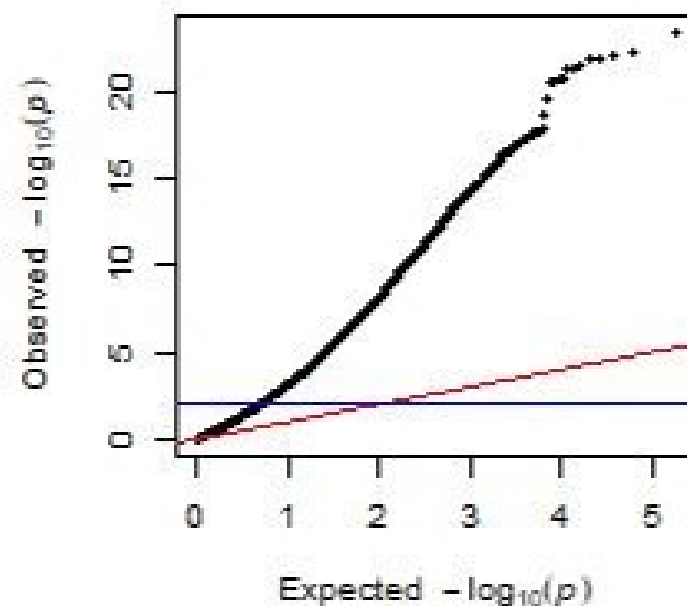

Accounting only for kinship

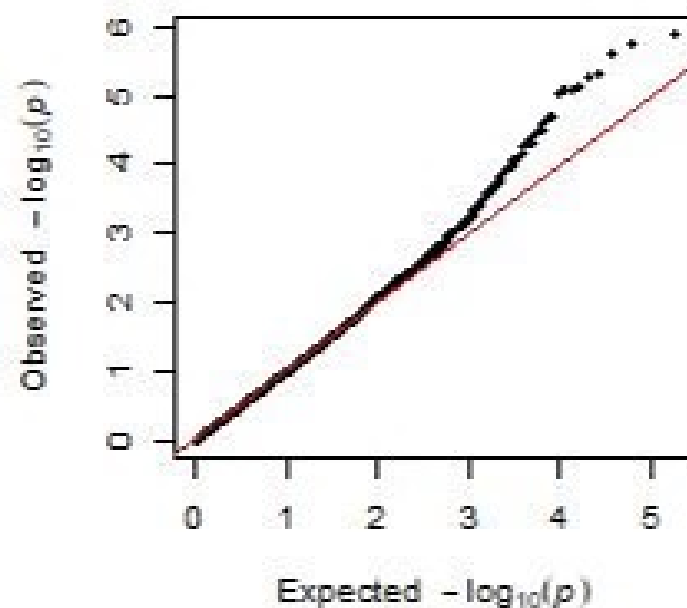

Accounting for kinship and structure

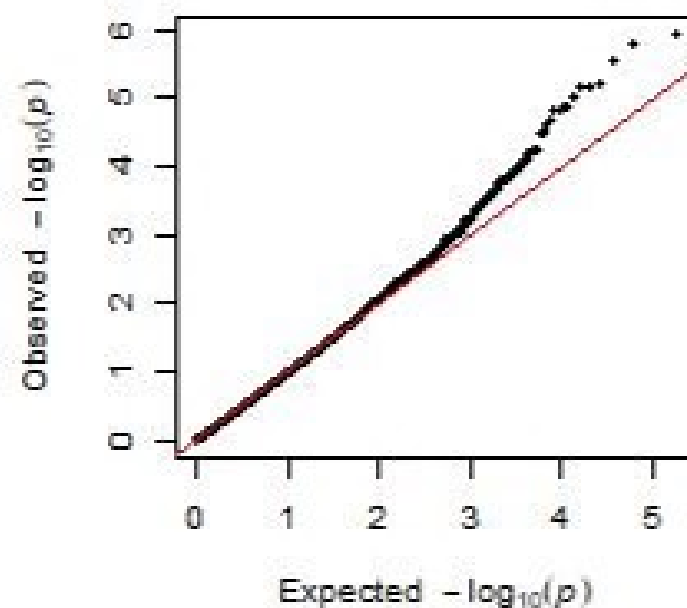

# trait: AHD\_lu17

No accounting for kinship or structure

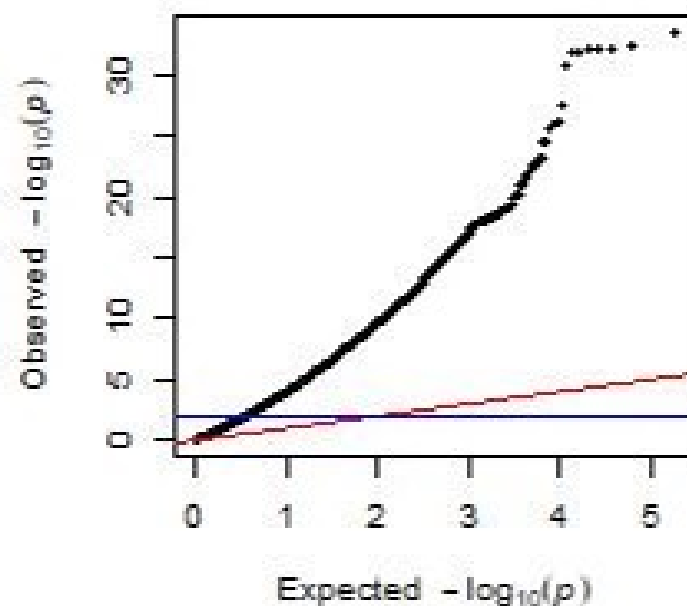

Accounting only for structure

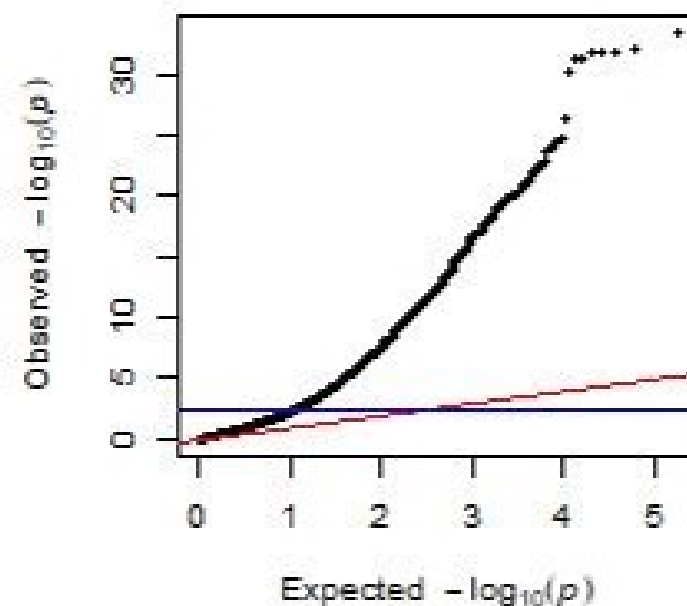

Accounting only for kinship

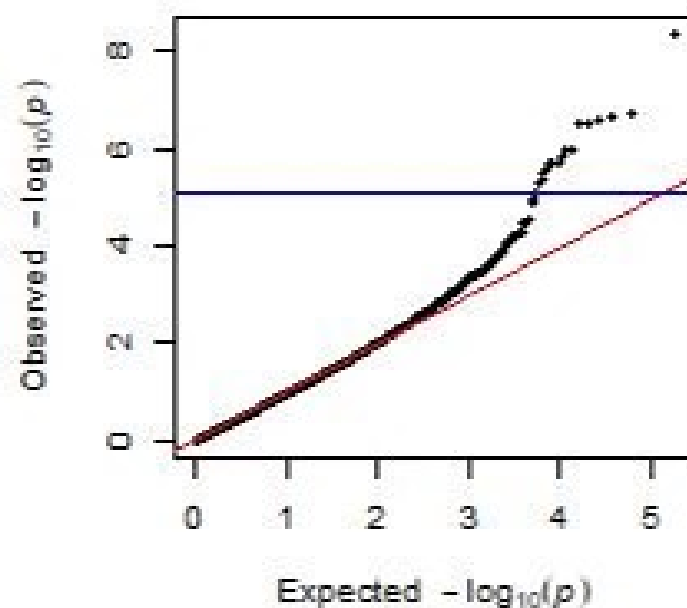

Accounting for kinship and structure

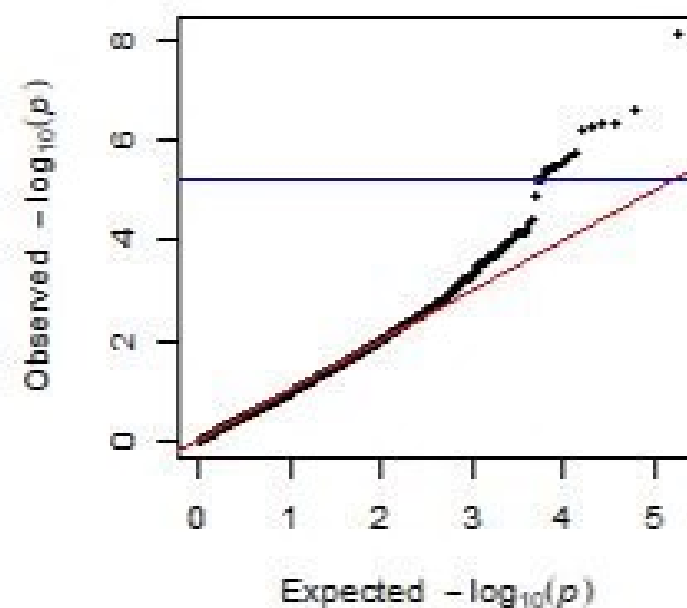

# trait: AHD\_me16

No accounting for kinship or structure

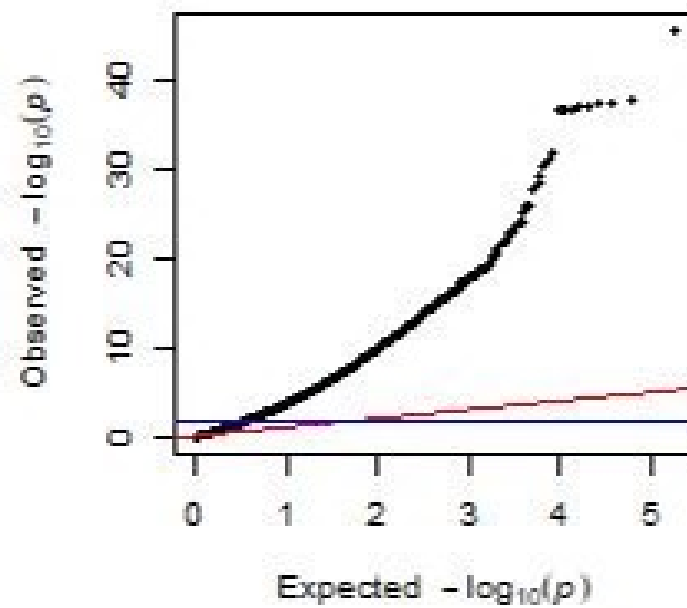

Accounting only for structure

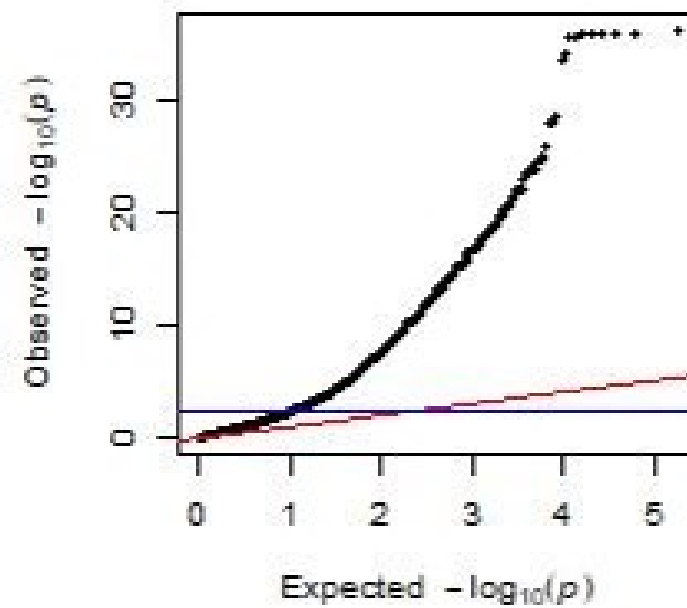

Accounting only for kinship

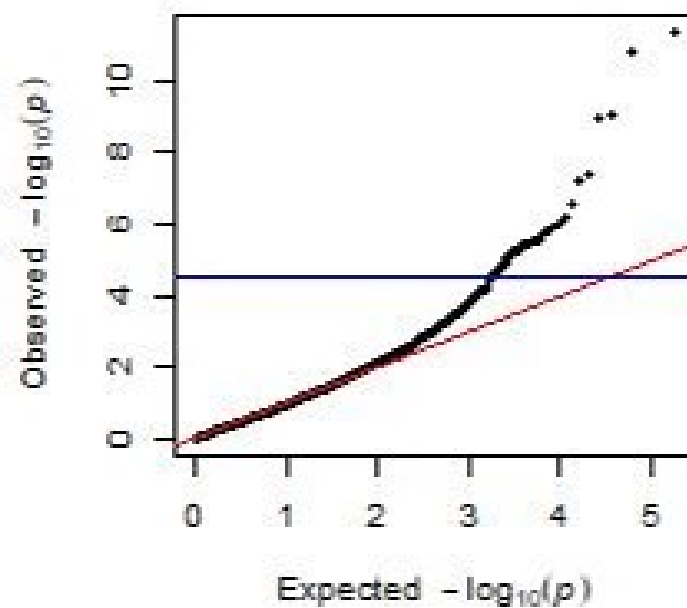

Accounting for kinship and structure

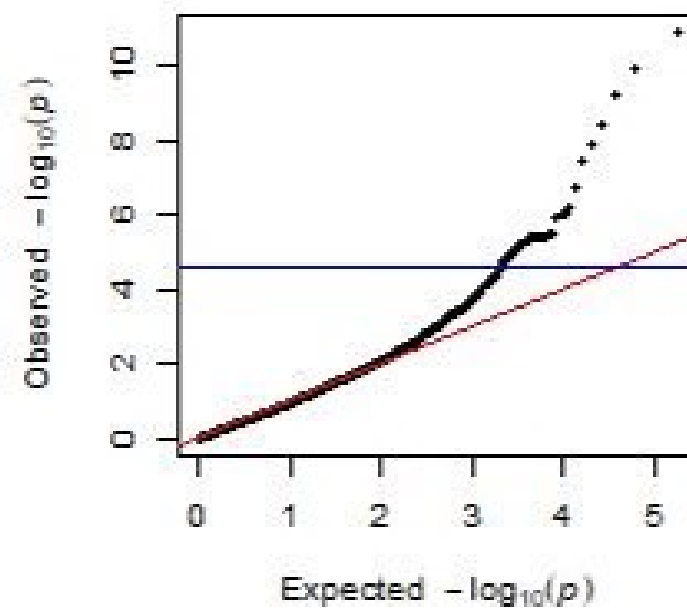

# trait: AHD\_me17

No accounting for kinship or structure

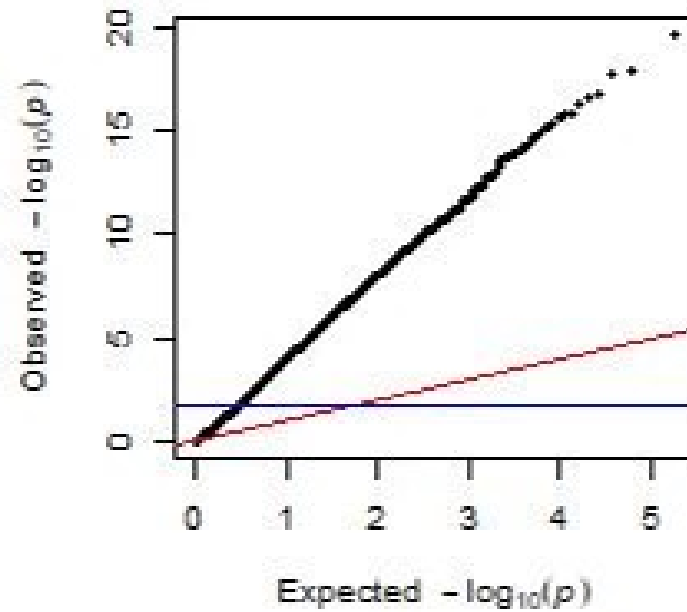

Accounting only for structure

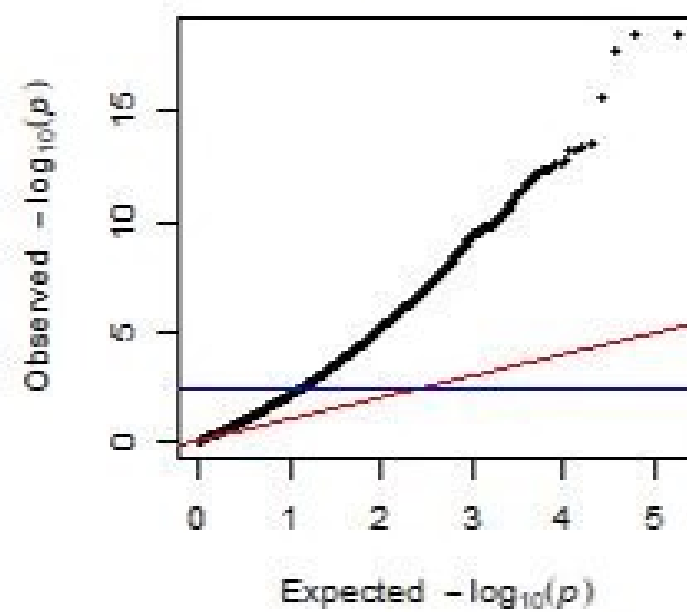

Accounting only for kinship

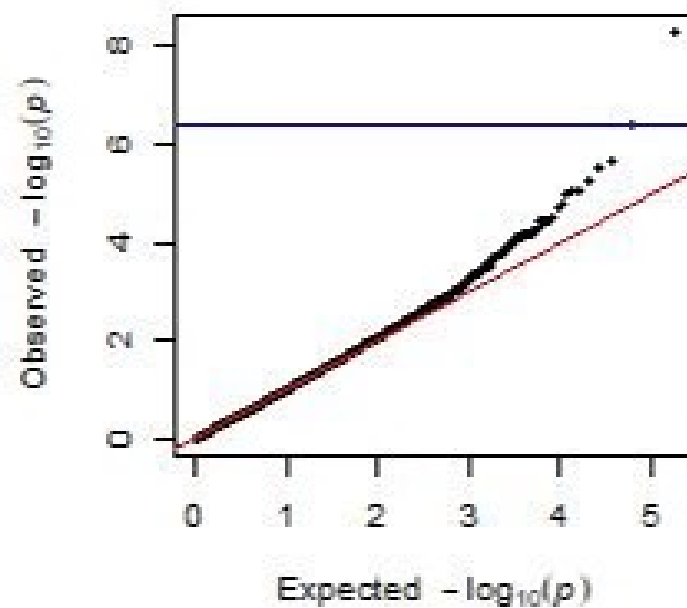

Accounting for kinship and structure

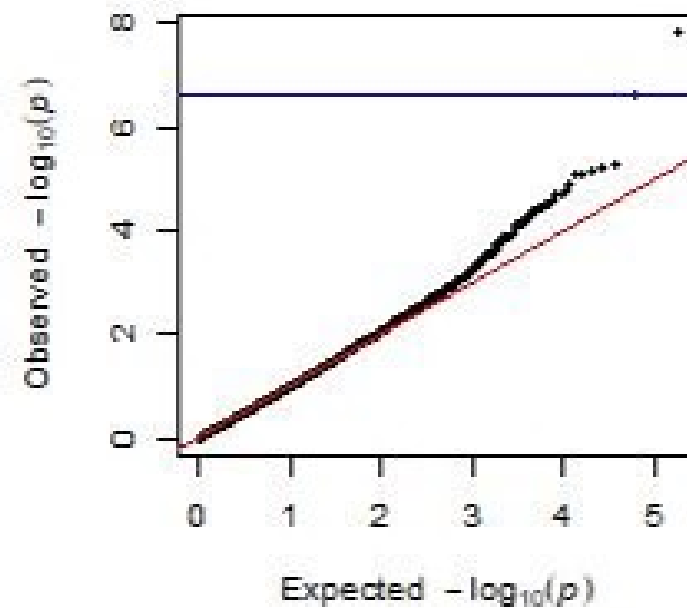

# trait: AHD\_po16

No accounting for kinship or structure

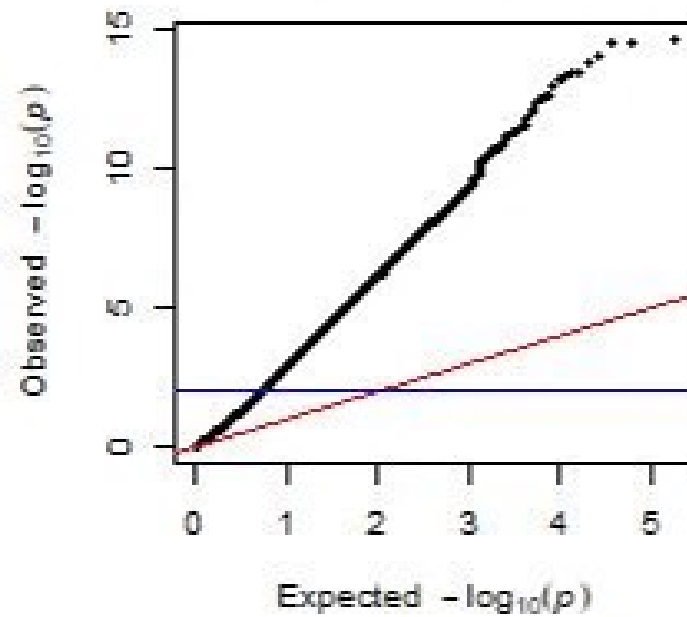

Accounting only for structure

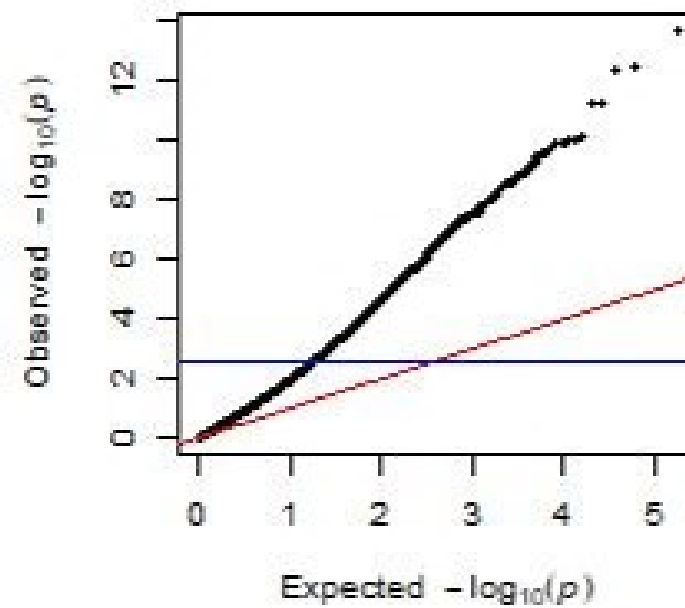

Accounting only for kinship

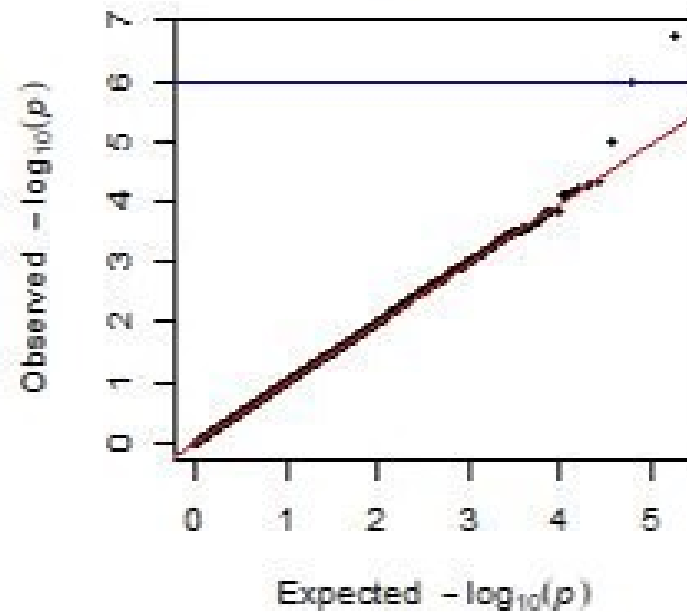

Accounting for kinship and structure

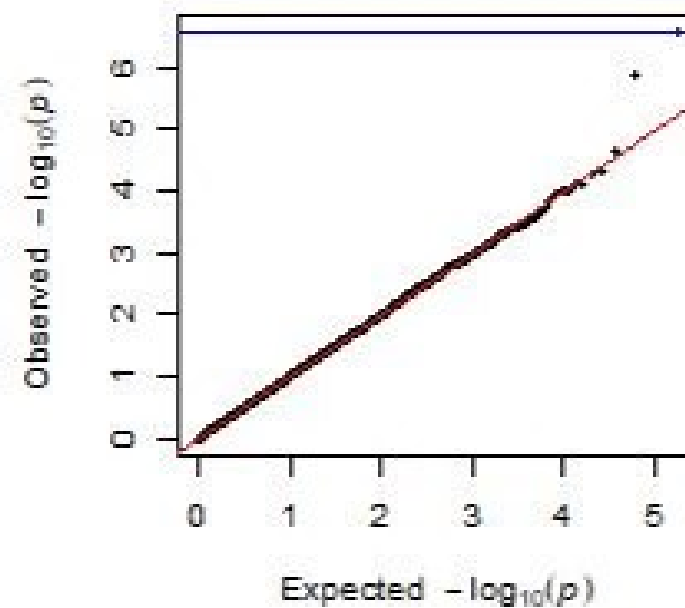

# trait: AHD\_po17

No accounting for kinship or structure

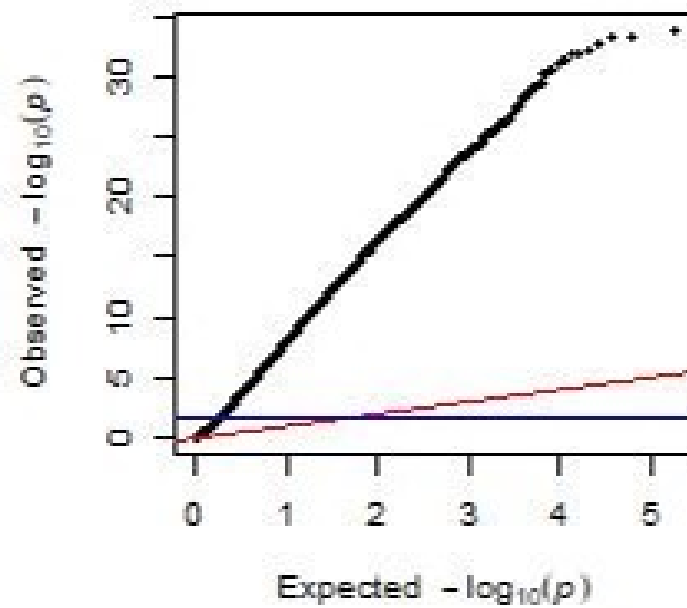

Accounting only for structure

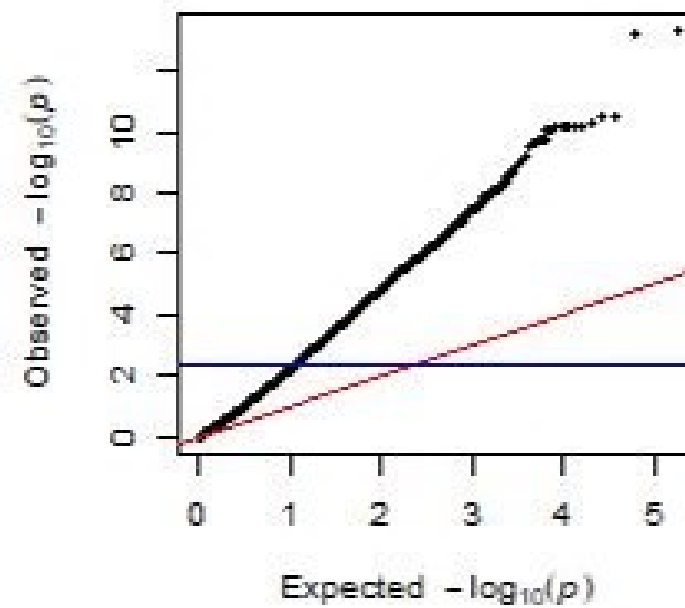

Accounting only for kinship

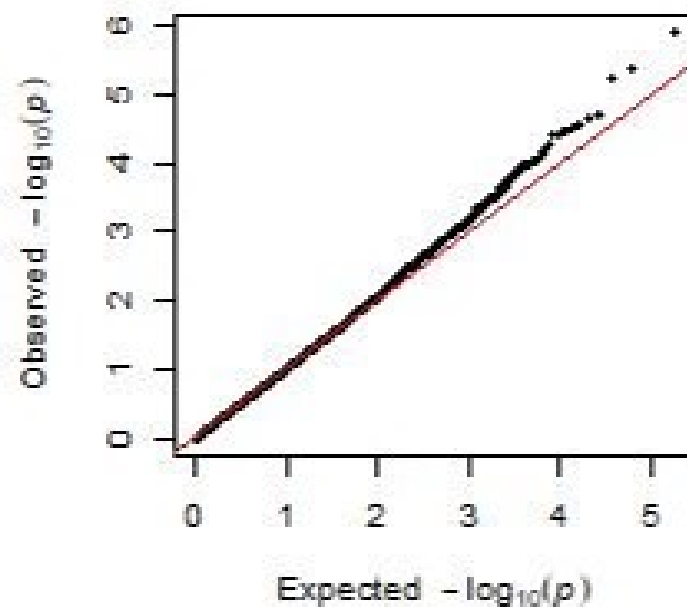

Accounting for kinship and structure

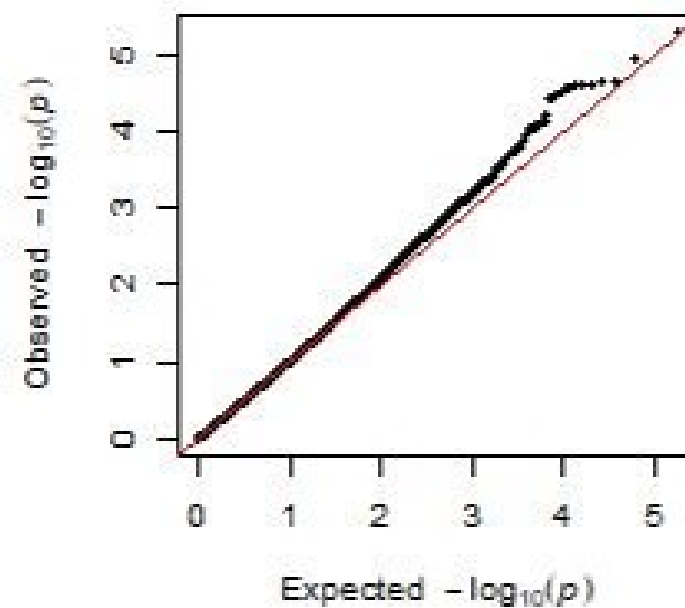



# trait: AMH\_me17

No accounting for kinship or structure

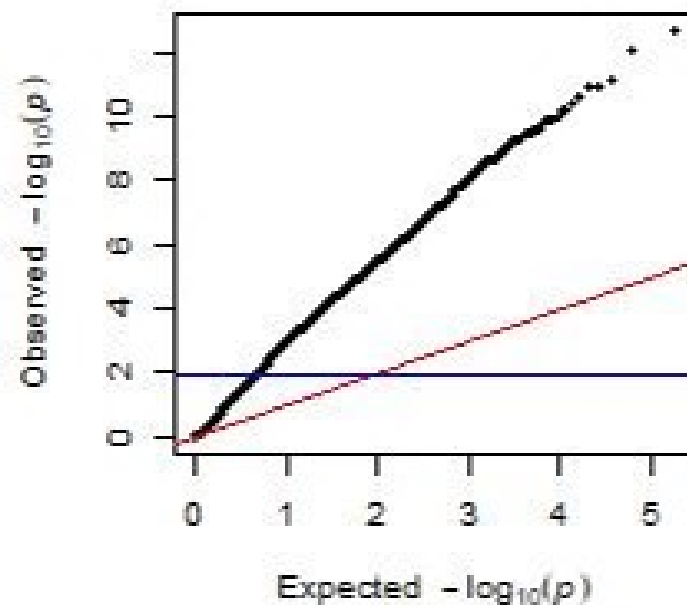

Accounting only for structure

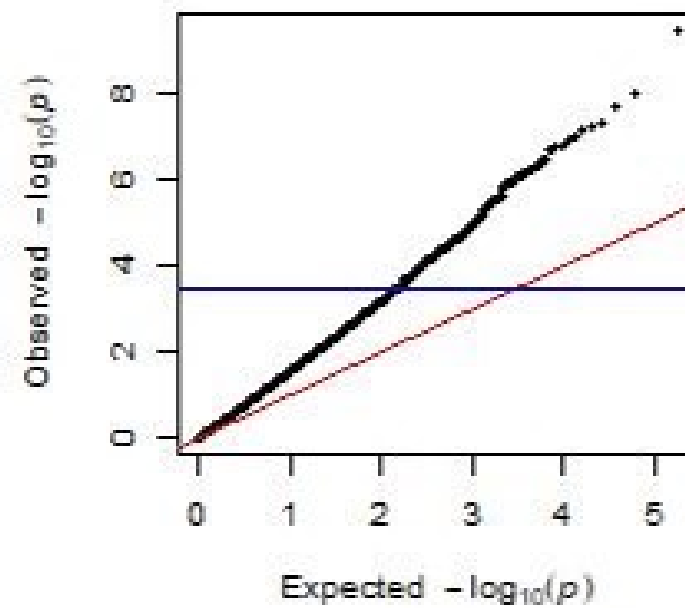

Accounting only for kinship

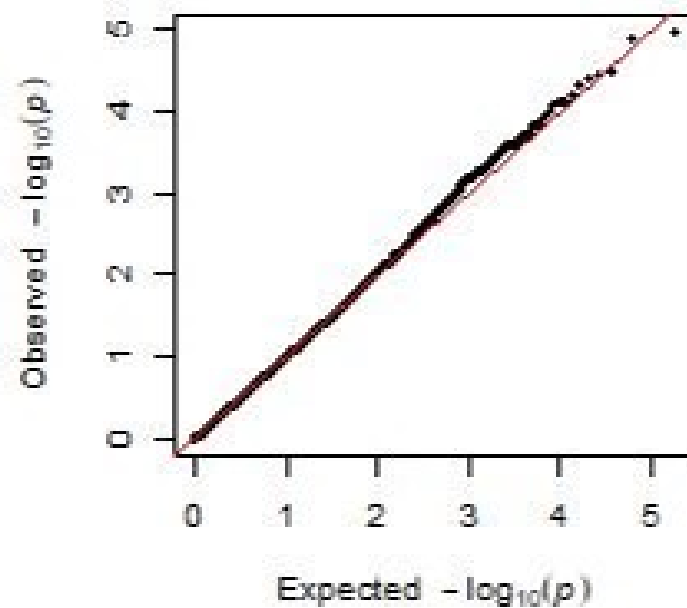

Accounting for kinship and structure

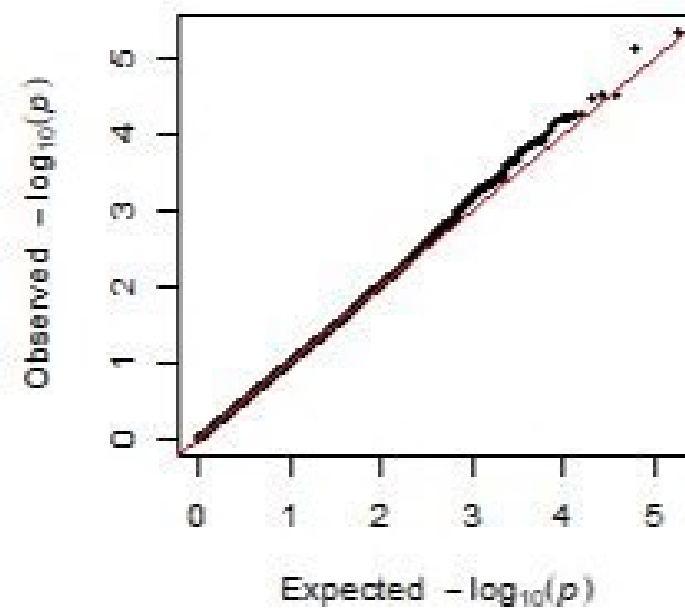

# trait: AMH\_po17

No accounting for kinship or structure

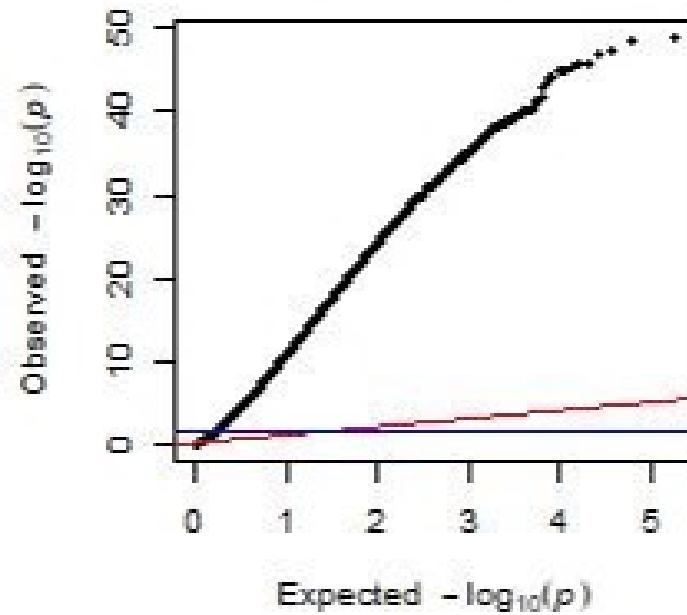

Accounting only for structure

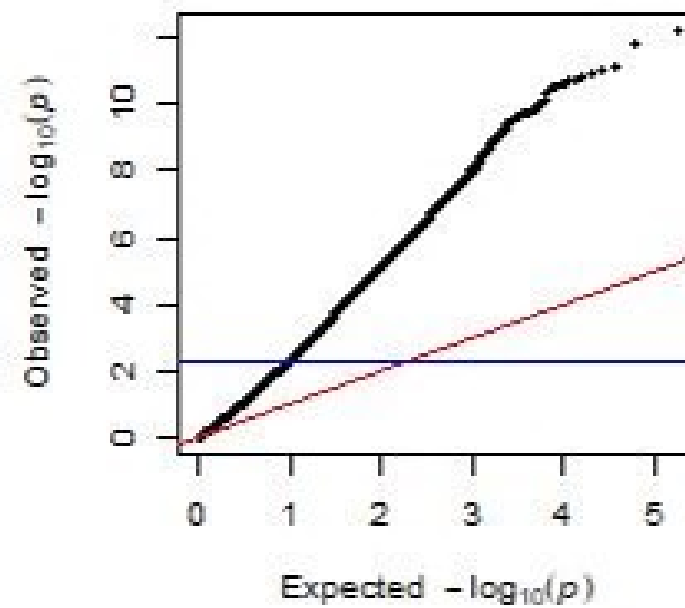

Accounting only for kinship

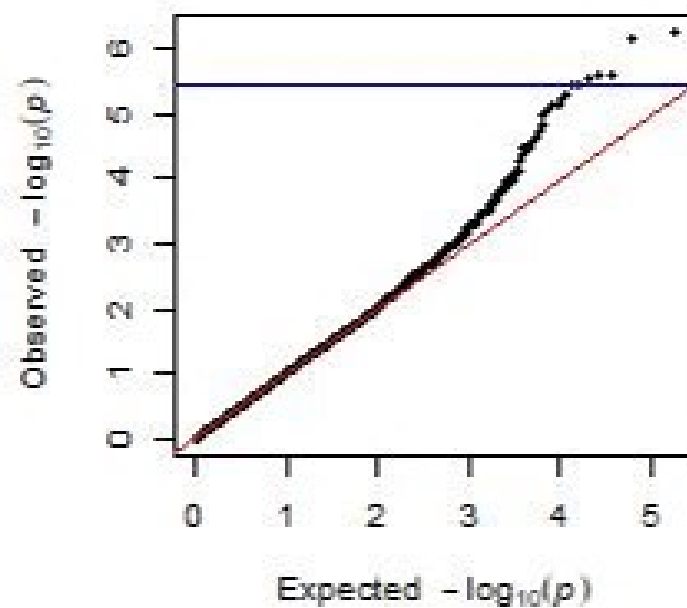

Accounting for kinship and structure

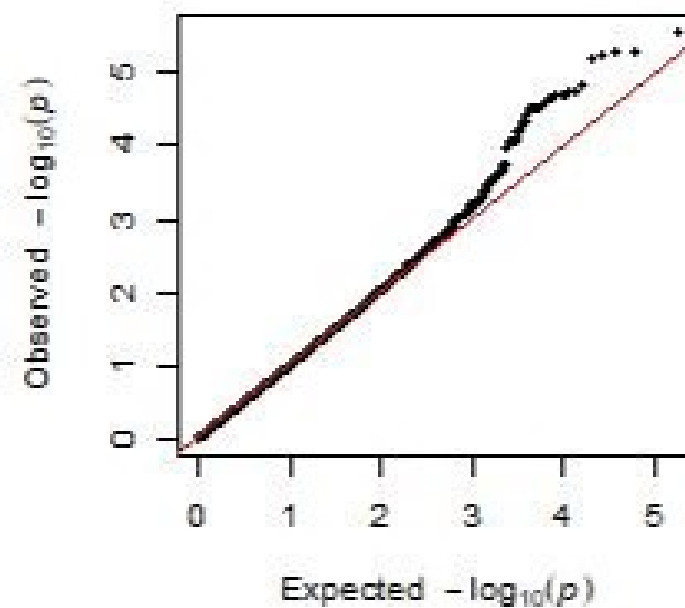

# trait: CH300h\_lu16

No accounting for kinship or structure

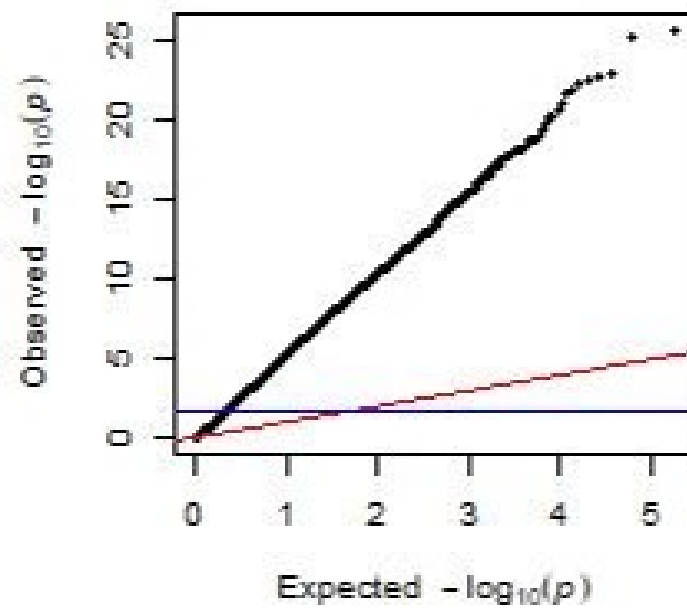

Accounting only for structure

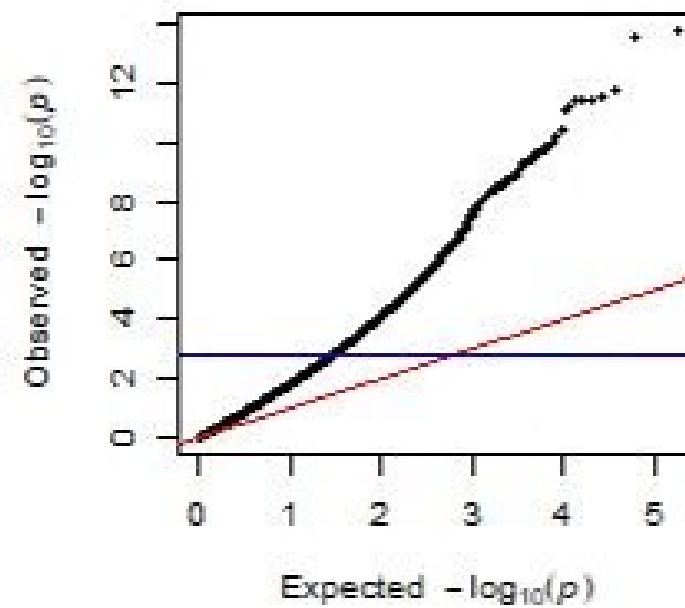

Accounting only for kinship

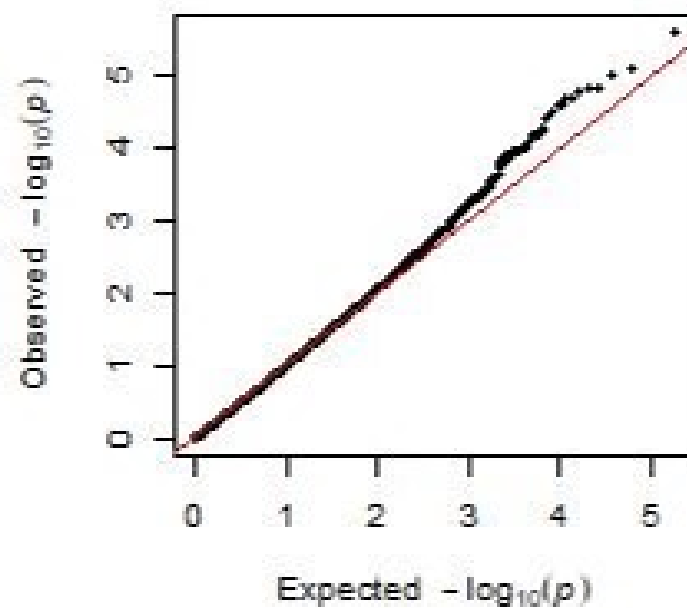

Accounting for kinship and structure

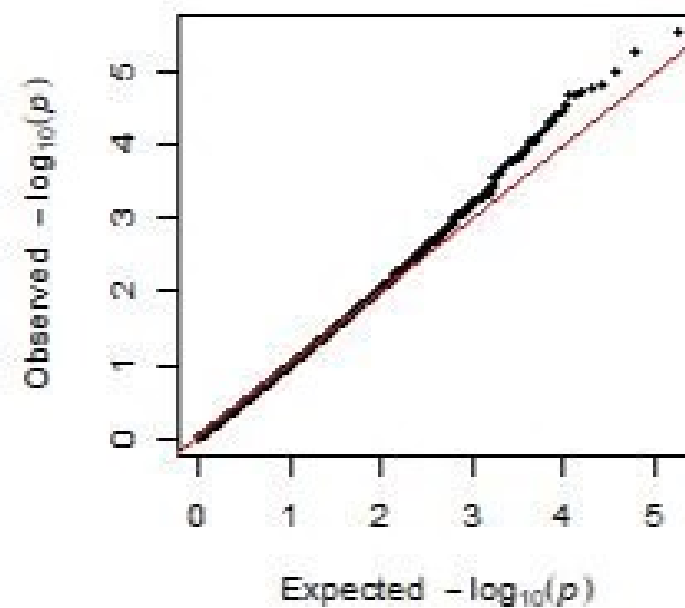

# trait: CH300h\_lu17

No accounting for kinship or structure

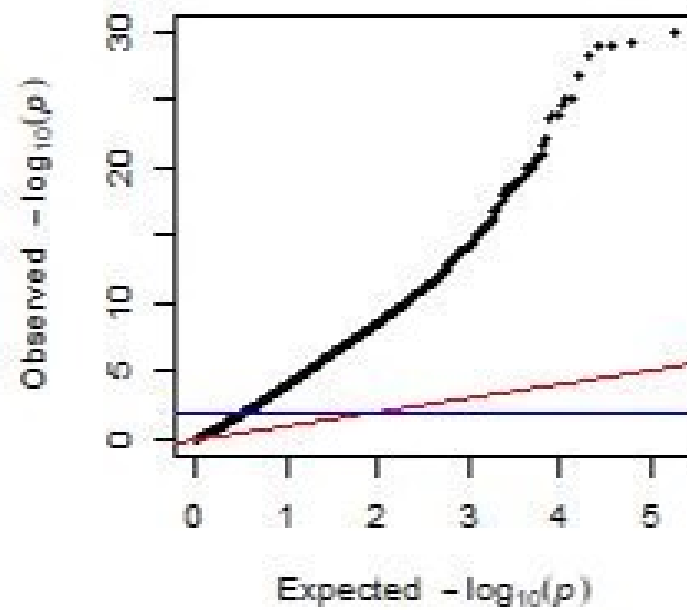

Accounting only for structure

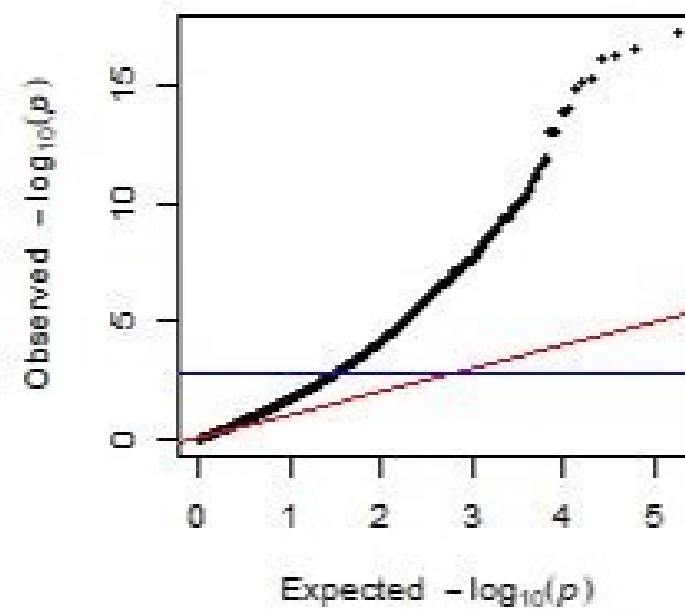

Accounting only for kinship

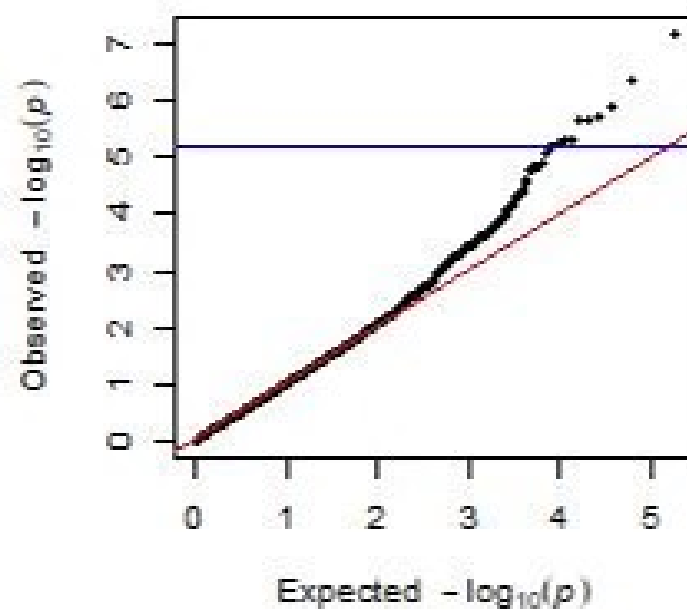

Accounting for kinship and structure

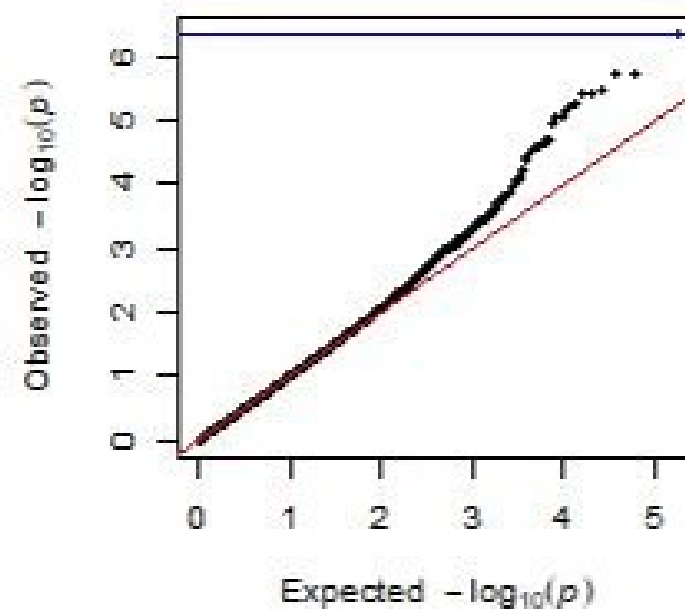

# trait: CH300h\_po16

No accounting for kinship or structure

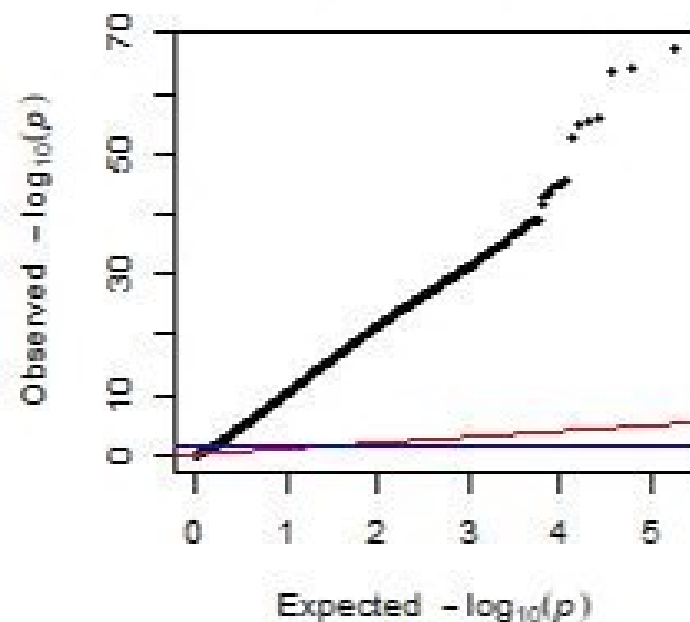

Accounting only for structure

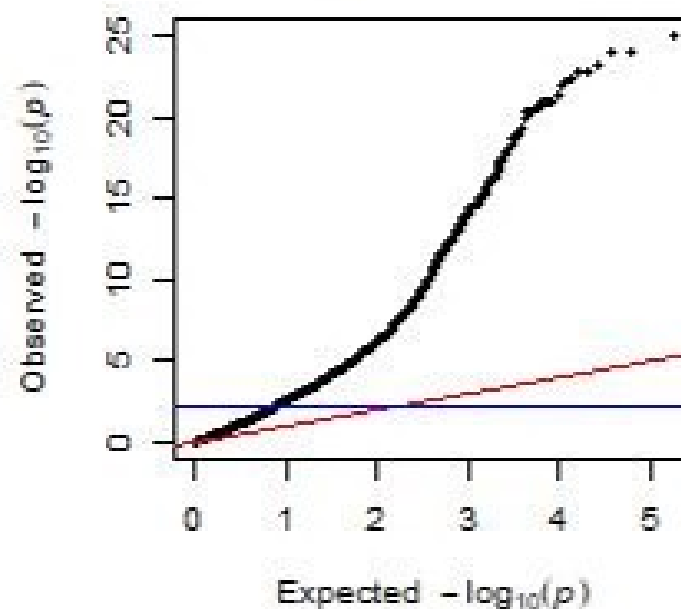

Accounting only for kinship

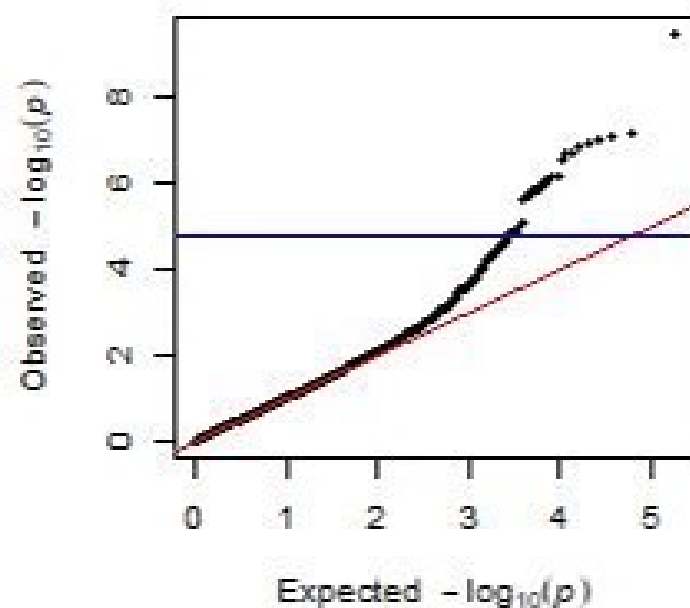

Accounting for kinship and structure

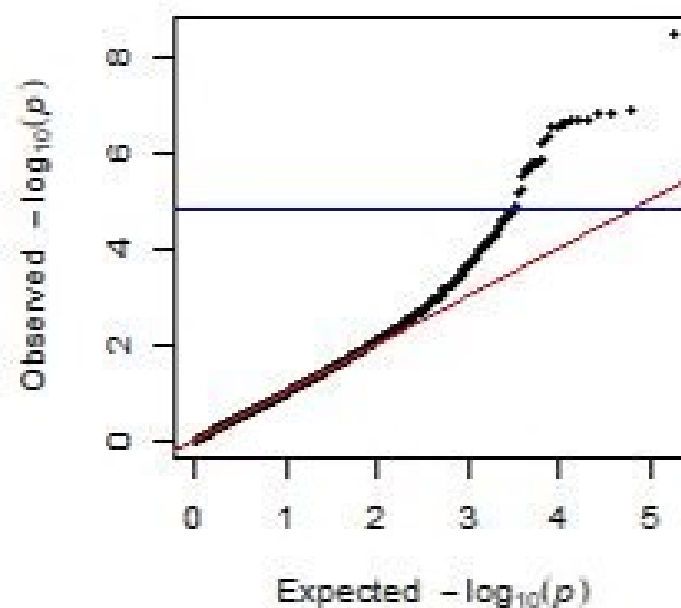

# trait: CH300h\_po17

No accounting for kinship or structure

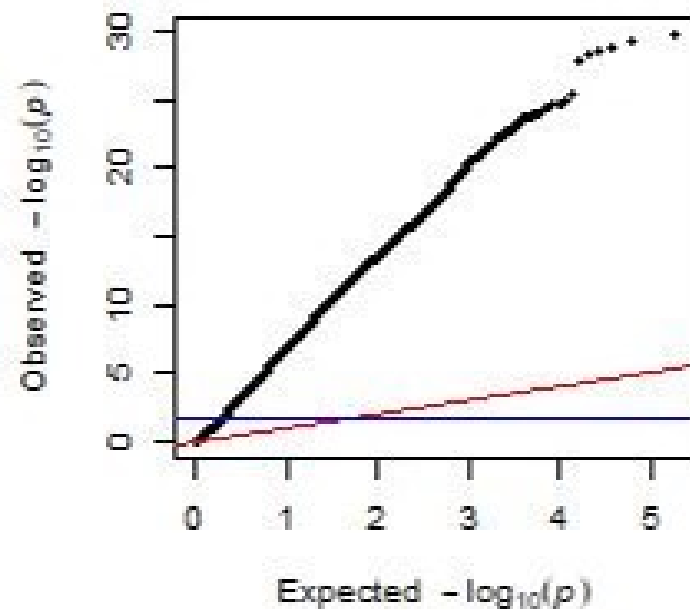

Accounting only for structure

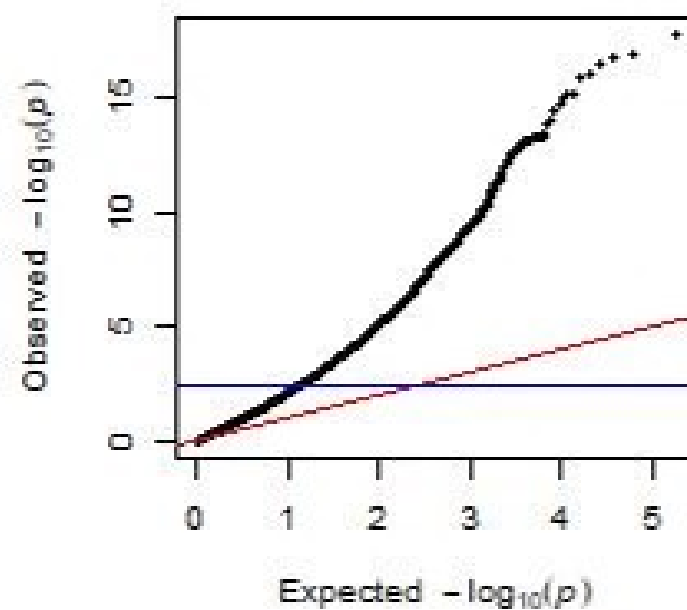

Accounting only for kinship

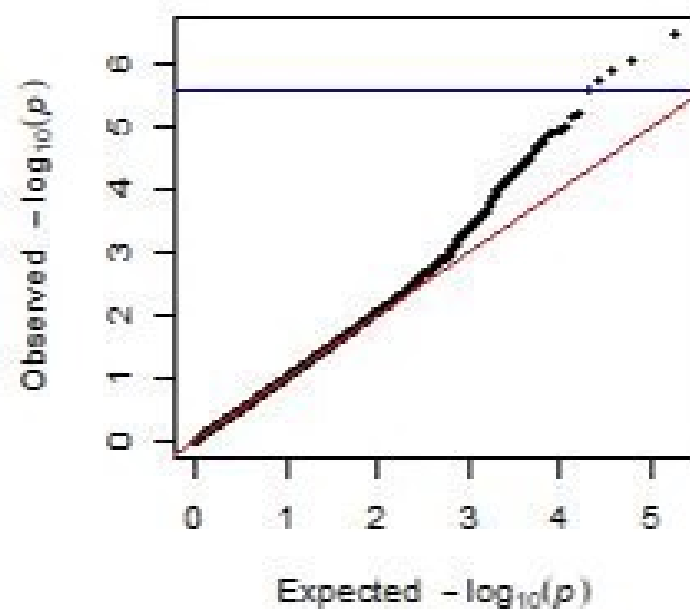

Accounting for kinship and structure

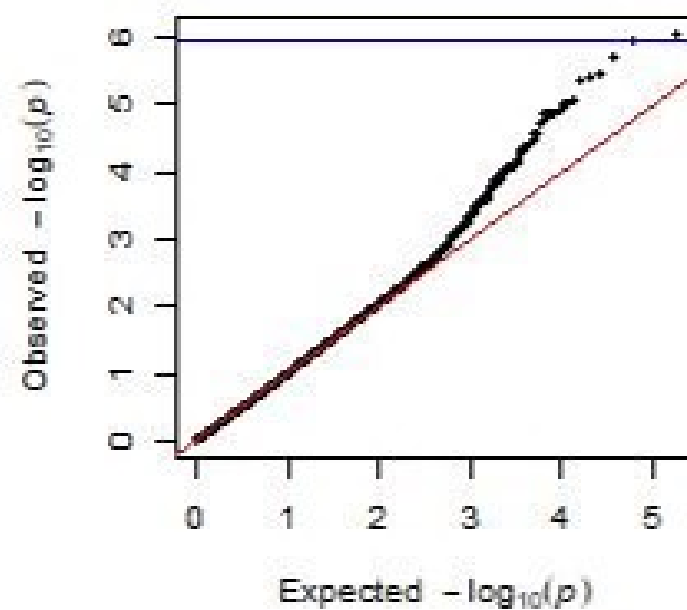

# trait: CH400h\_lu16

No accounting for kinship or structure

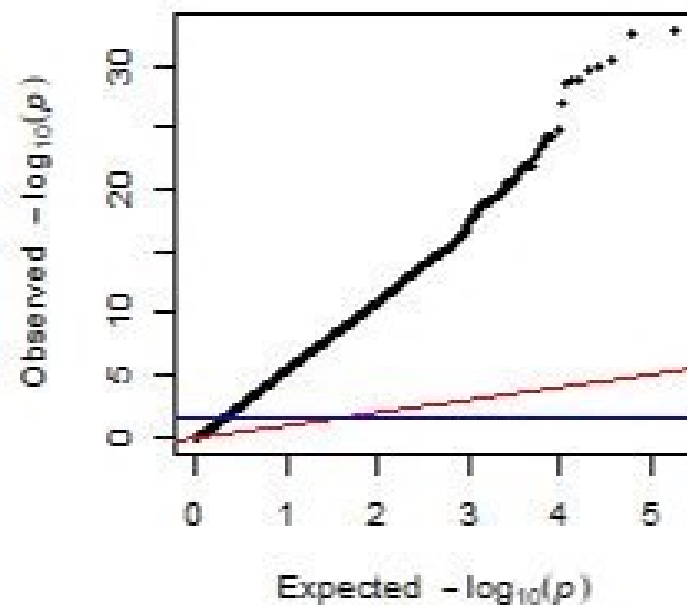

Accounting only for structure

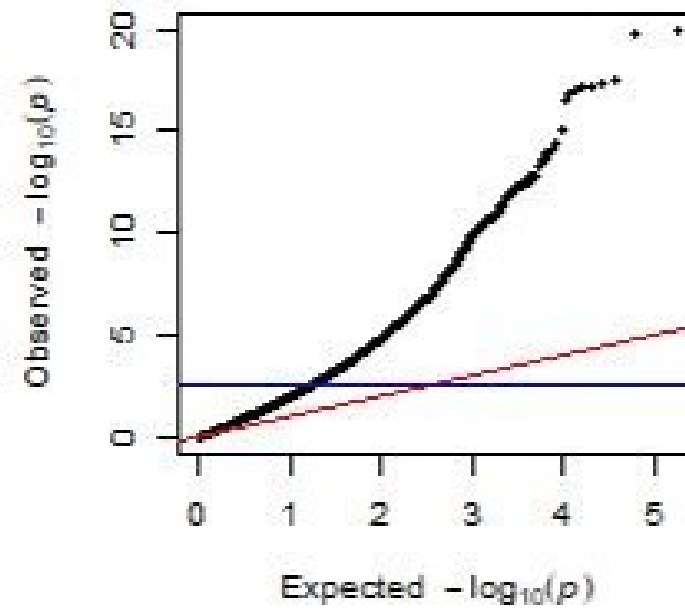

Accounting only for kinship

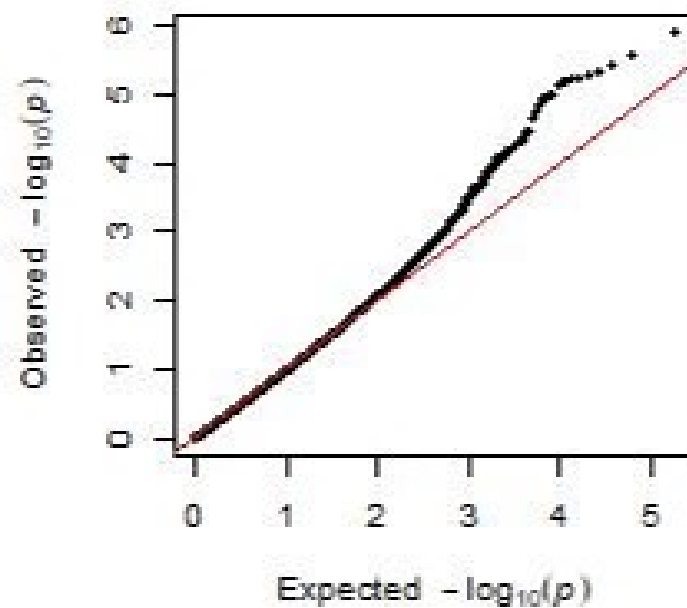

Accounting for kinship and structure

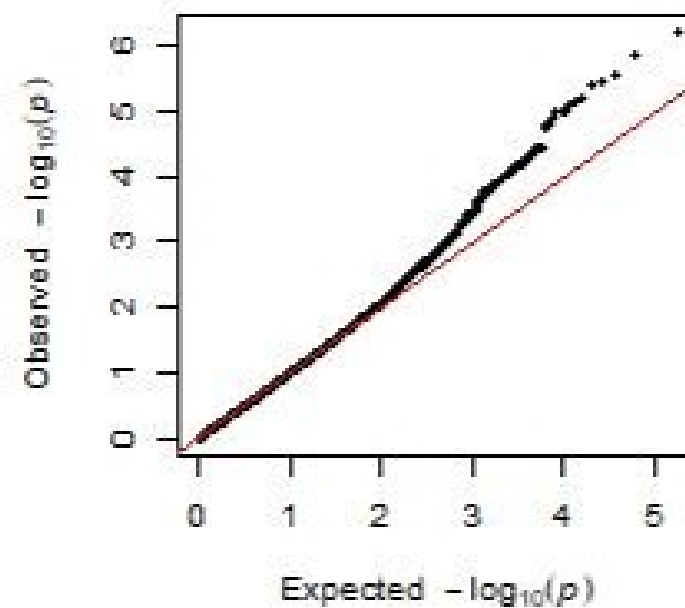

# trait: CH400h\_lu17

No accounting for kinship or structure

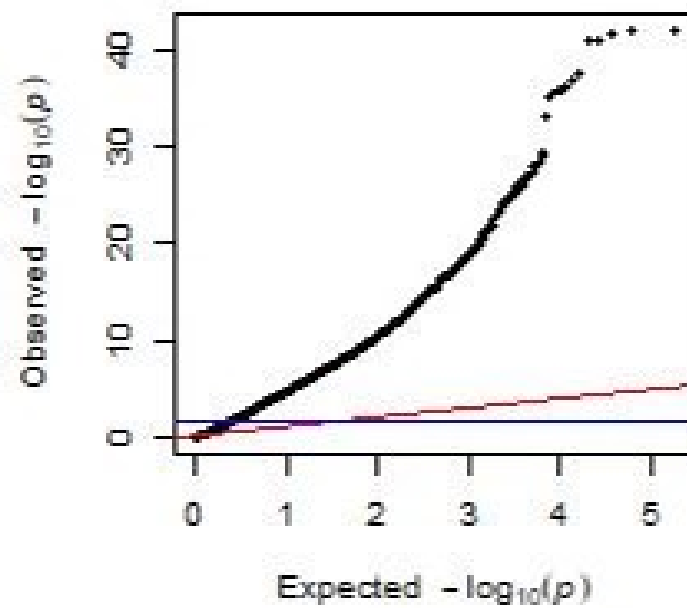

Accounting only for structure

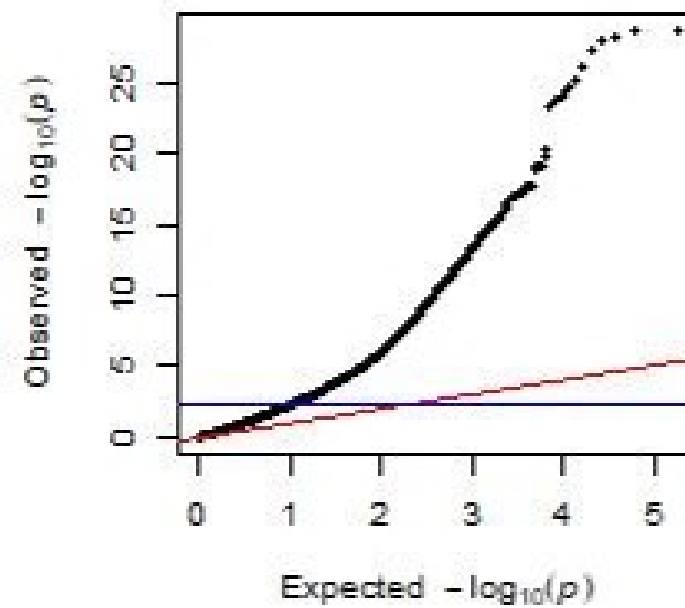

Accounting only for kinship

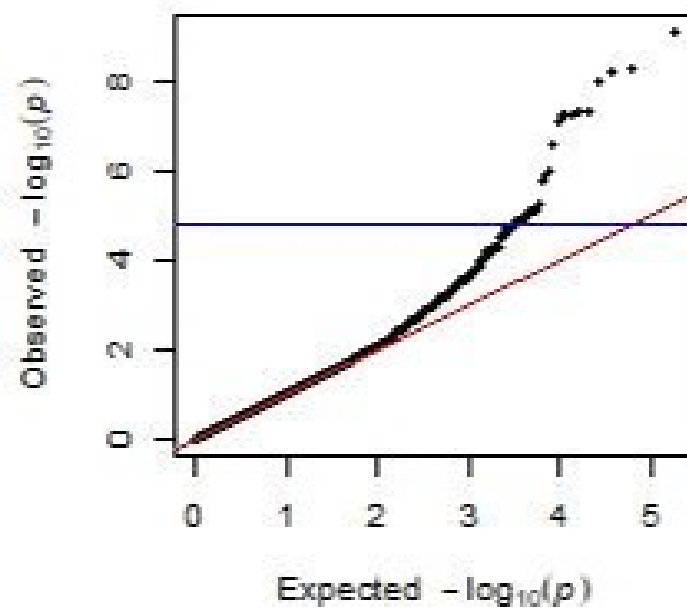

Accounting for kinship and structure

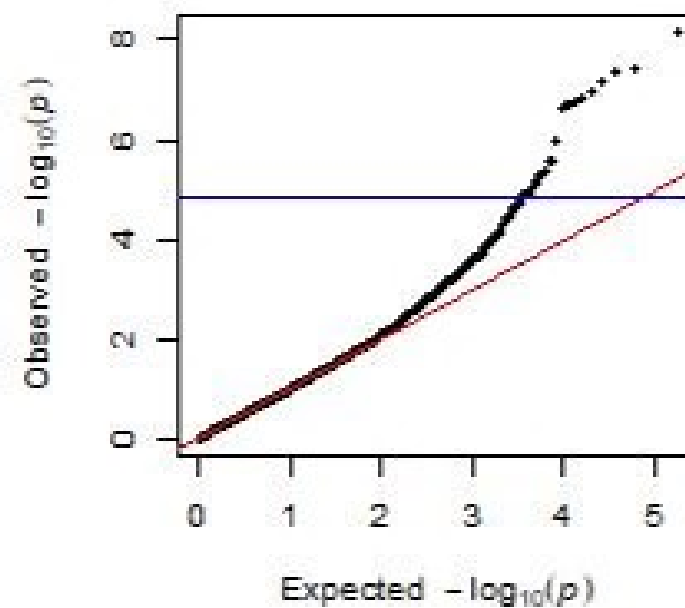



# trait: CH400h\_po16

No accounting for kinship or structure

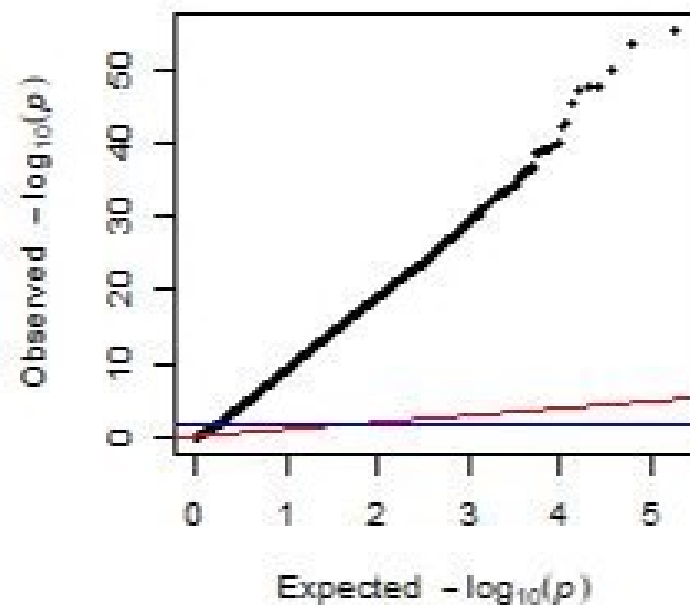

Accounting only for structure

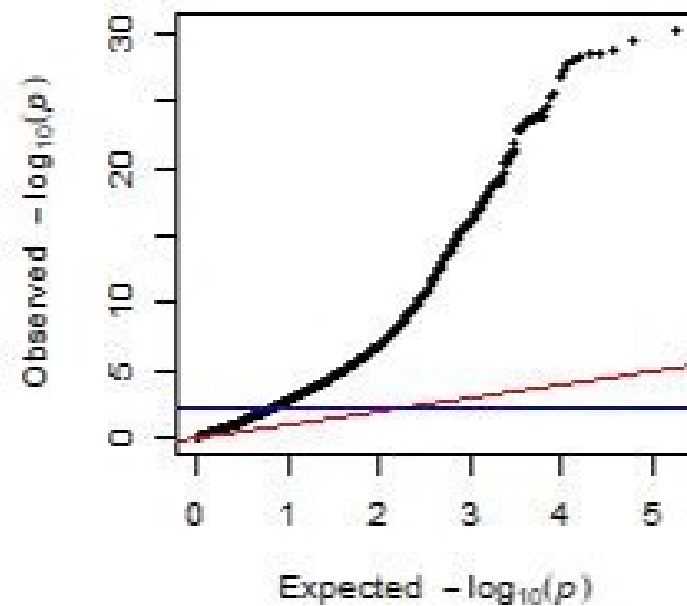

Accounting only for kinship

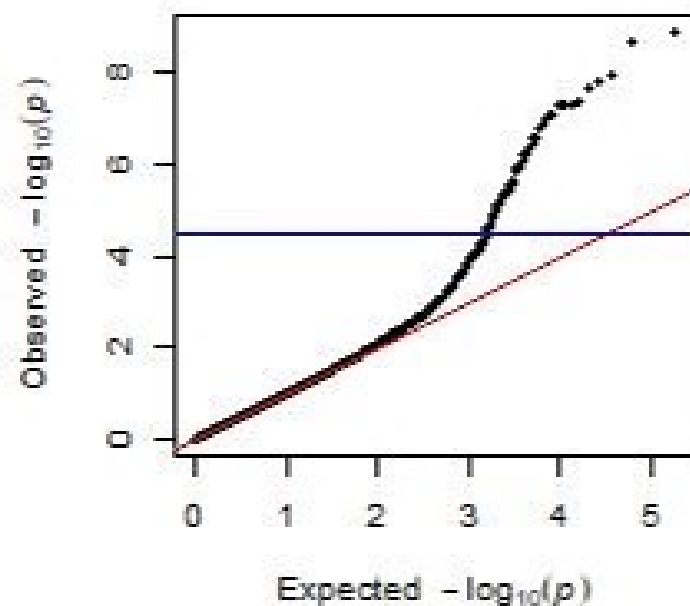

Accounting for kinship and structure

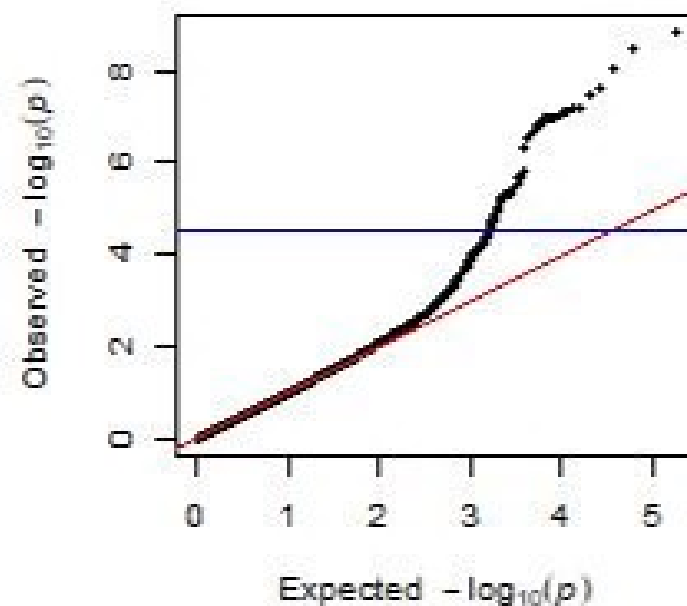

# trait: CH400h\_po17

No accounting for kinship or structure

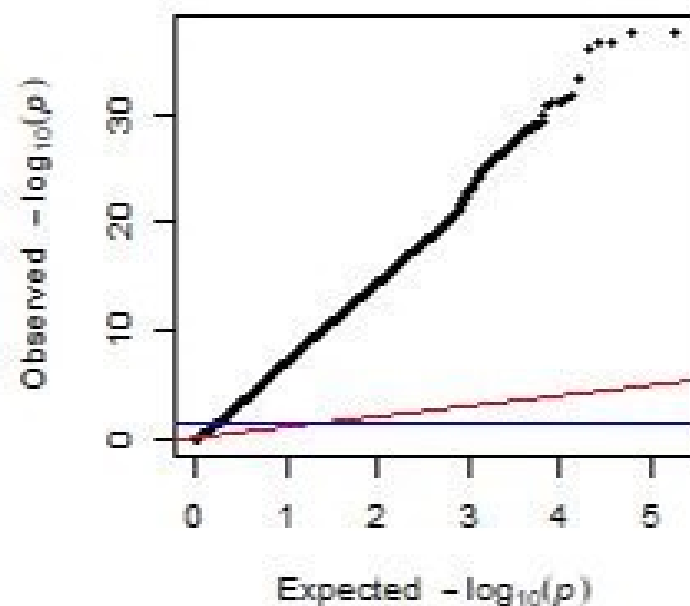

Accounting only for structure

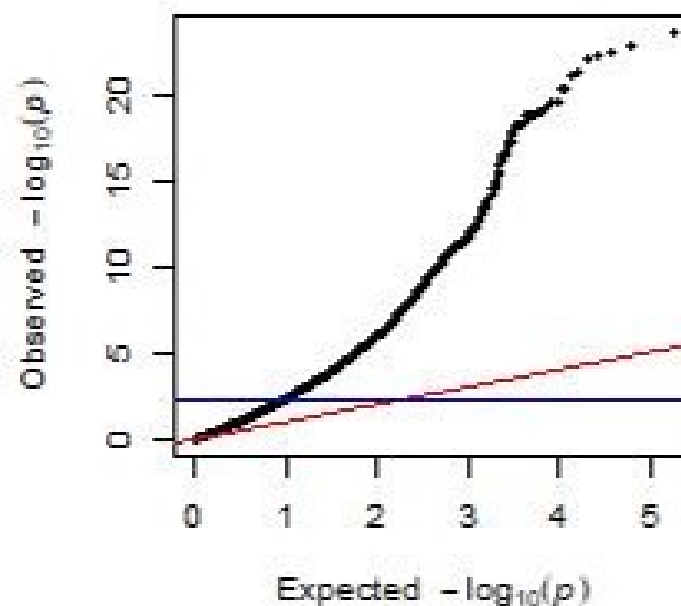

Accounting only for kinship

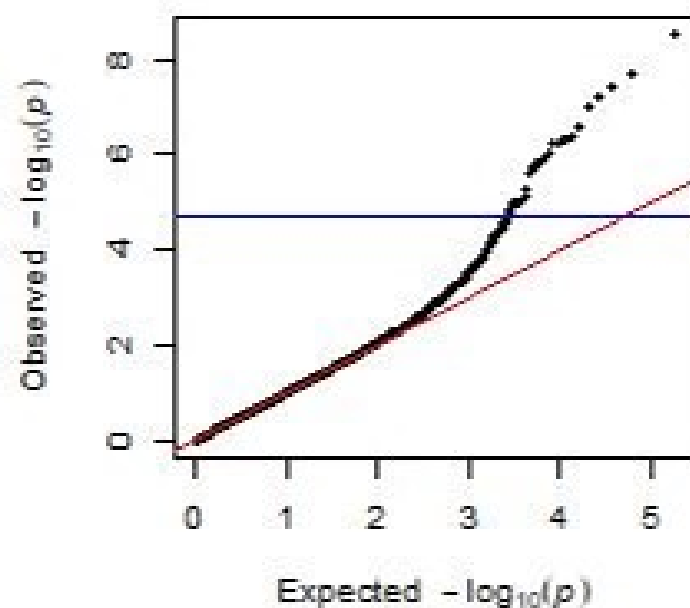

Accounting for kinship and structure

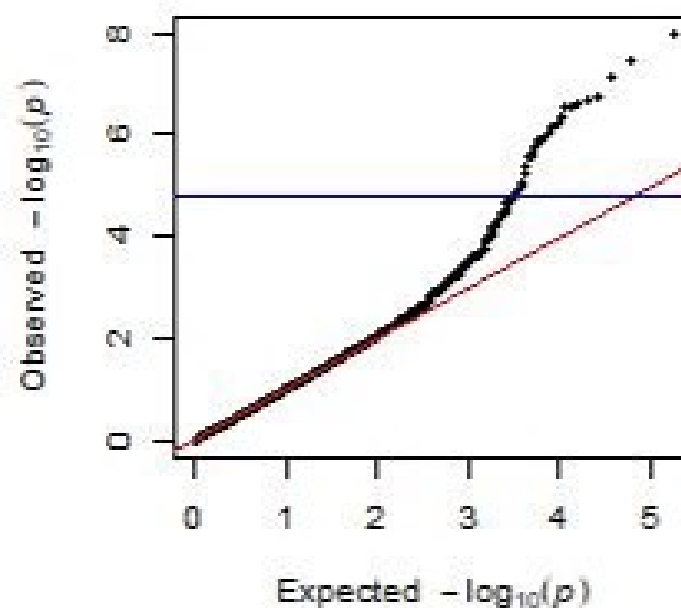

# trait: CHs300\_lu16

No accounting for kinship or structure

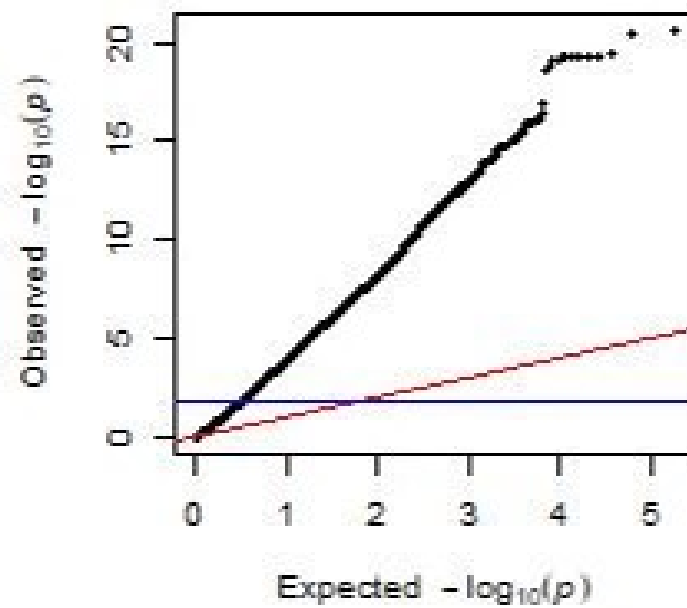

Accounting only for structure

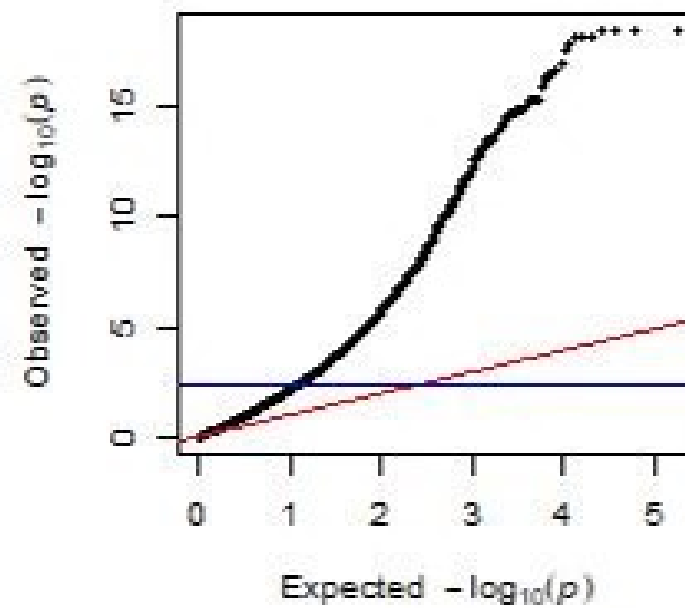

Accounting only for kinship

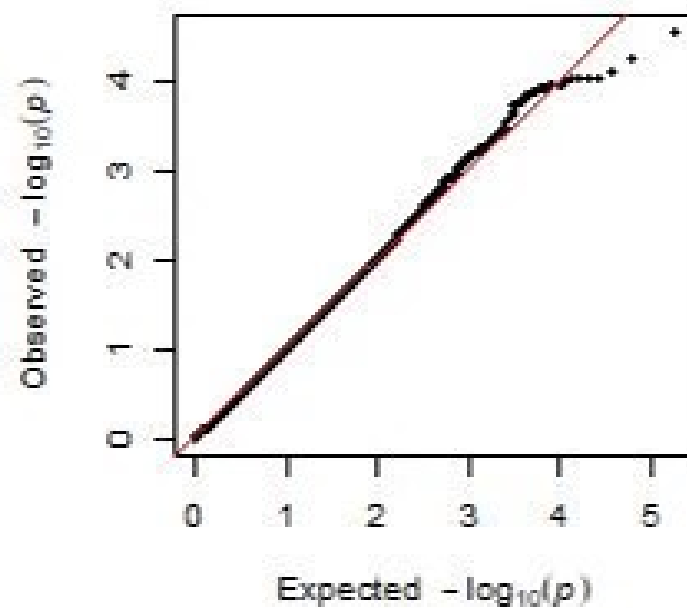

Accounting for kinship and structure

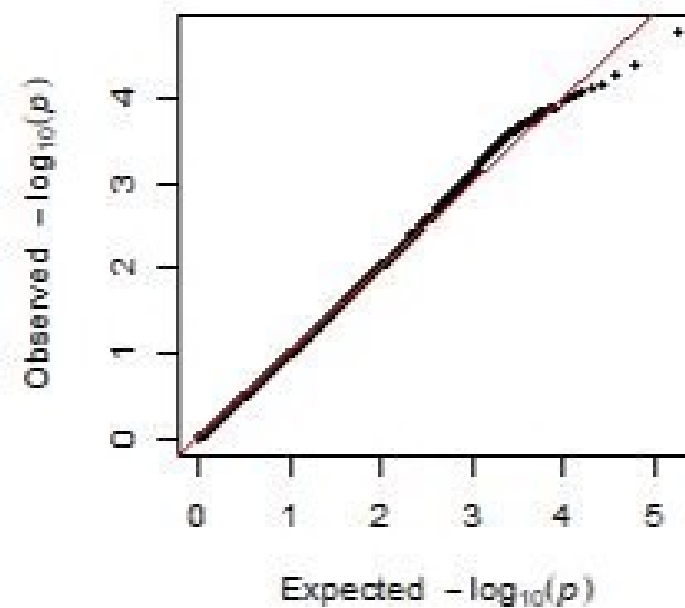

# trait: CHs300\_lu17

No accounting for kinship or structure

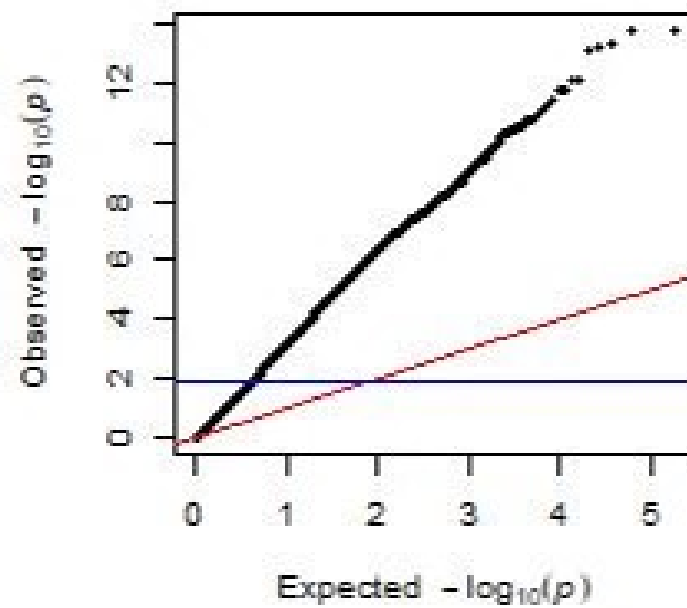

Accounting only for structure

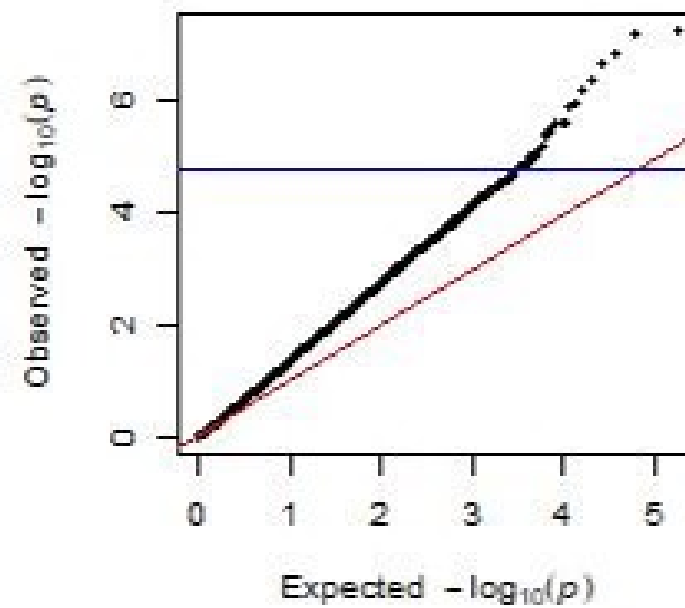

Accounting only for kinship

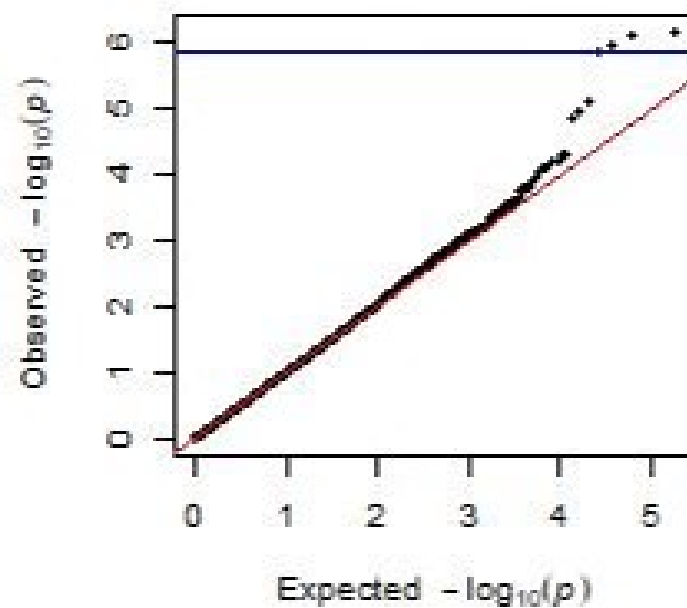

Accounting for kinship and structure

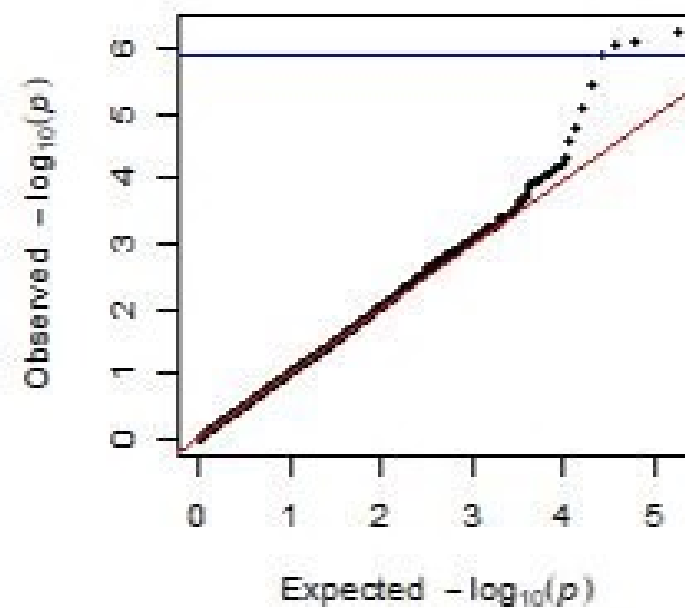

# trait: CHs300\_me16

No accounting for kinship or structure

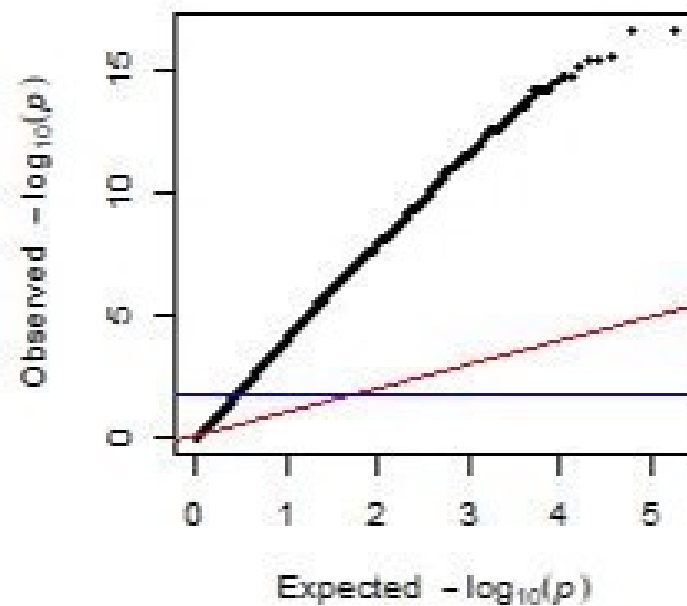

Accounting only for structure

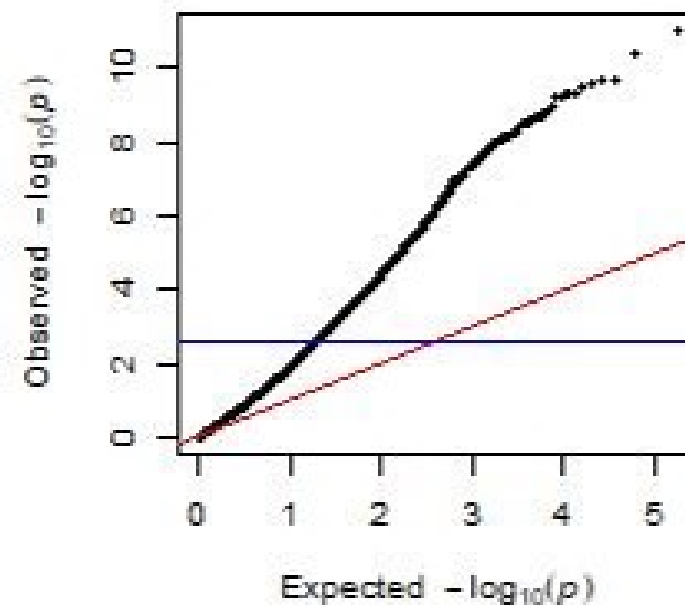

Accounting only for kinship

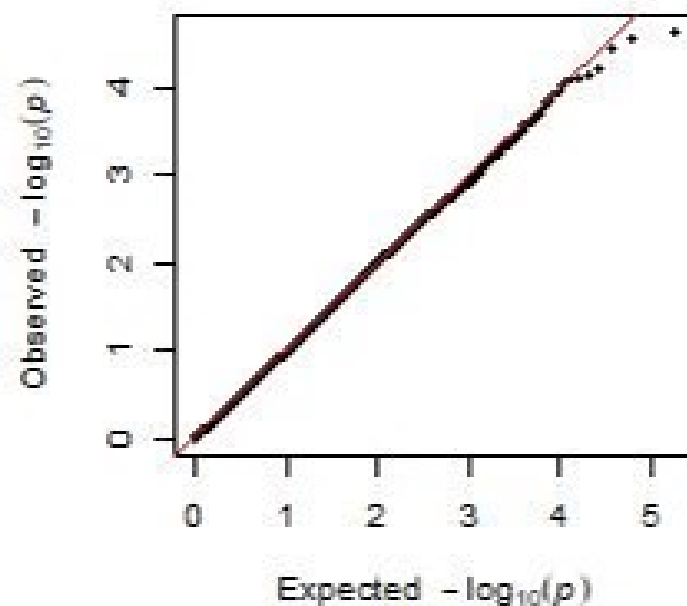

Accounting for kinship and structure

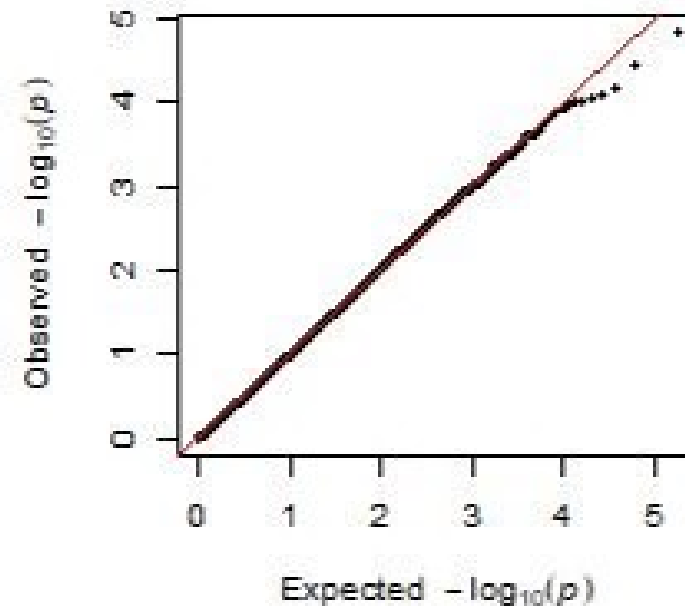

# trait: CHs300\_me17

No accounting for kinship or structure

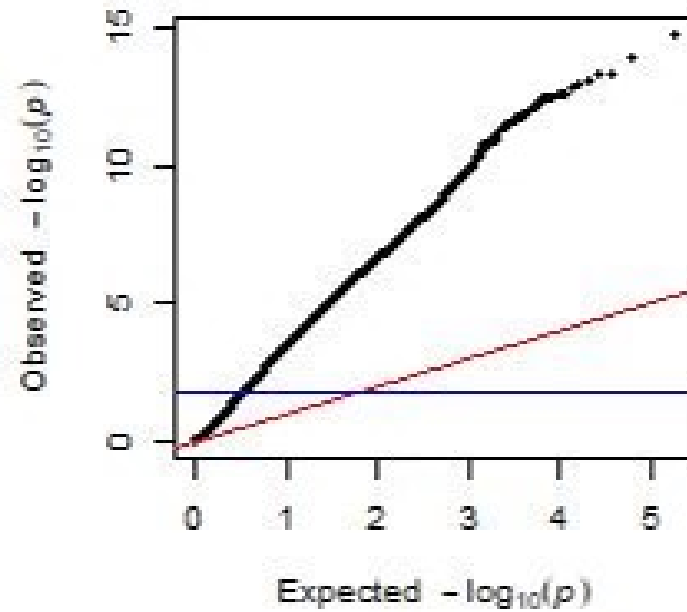

Accounting only for structure

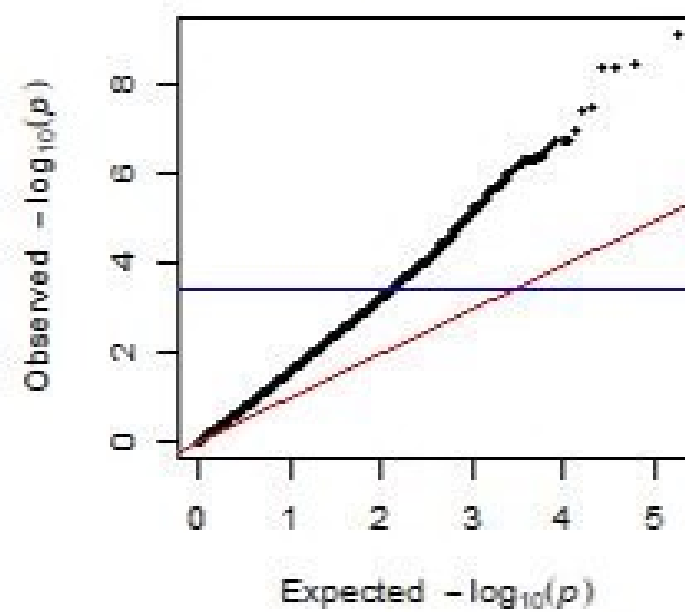

Accounting only for kinship

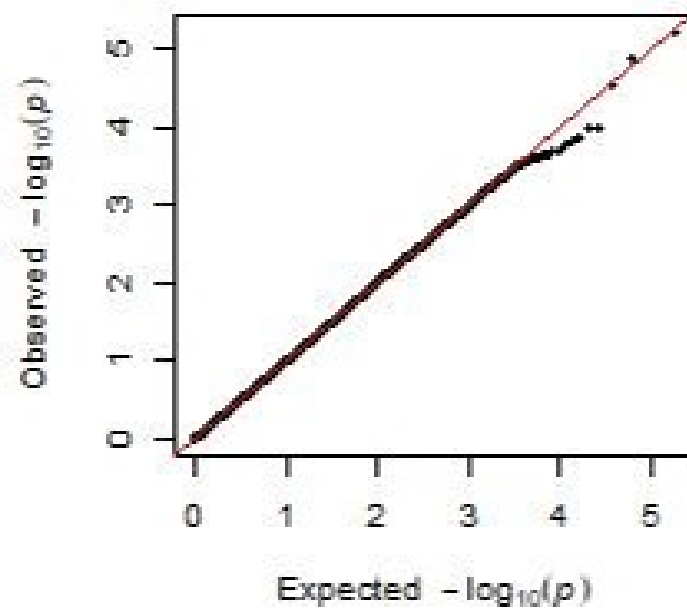

Accounting for kinship and structure

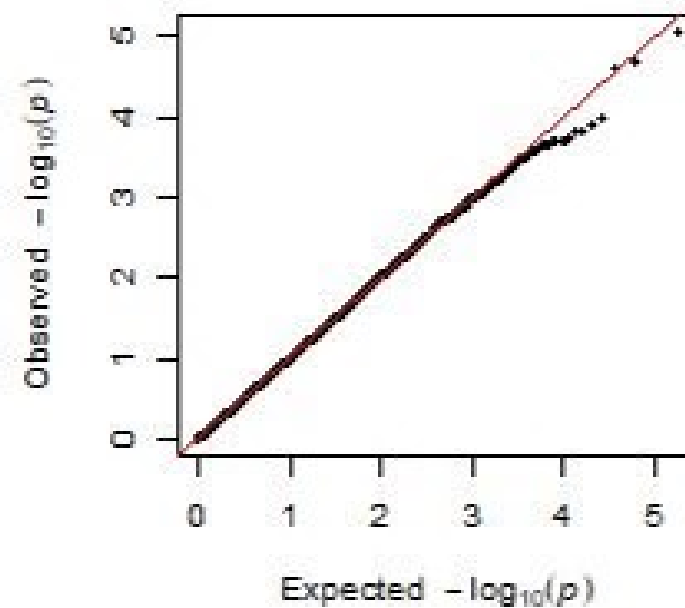

# trait: CHs300\_po16

No accounting for kinship or structure

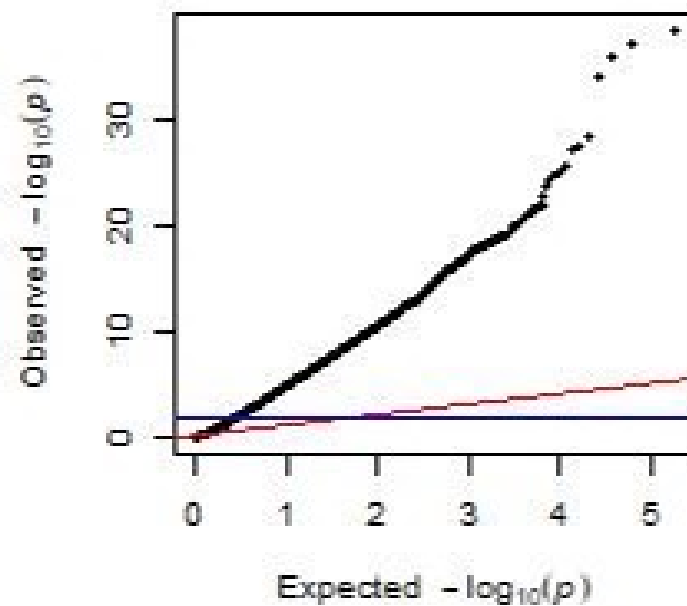

Accounting only for structure

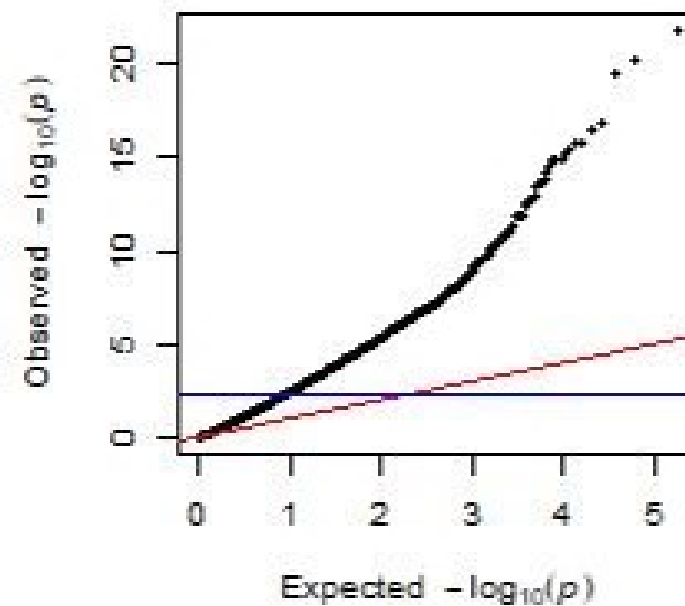

Accounting only for kinship

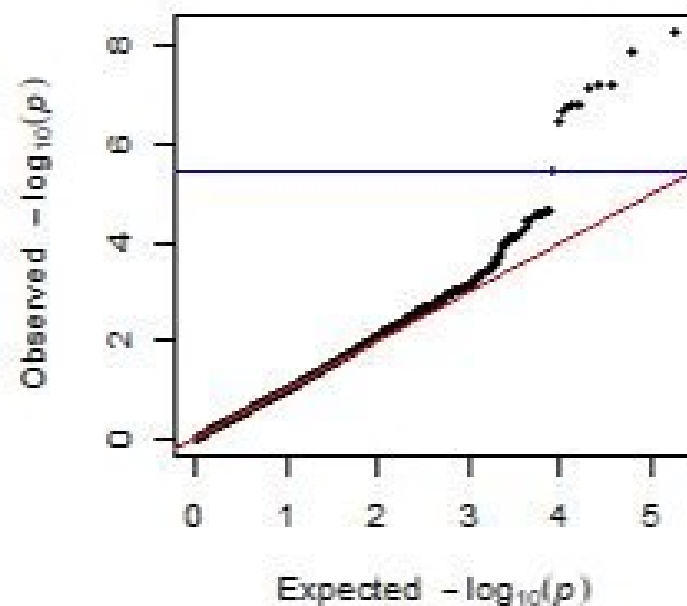

Accounting for kinship and structure

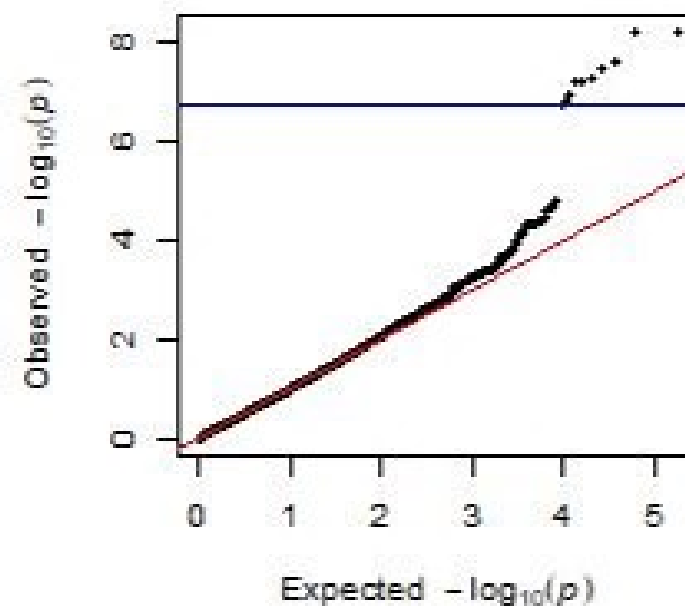

# trait: CHs300\_po17

No accounting for kinship or structure

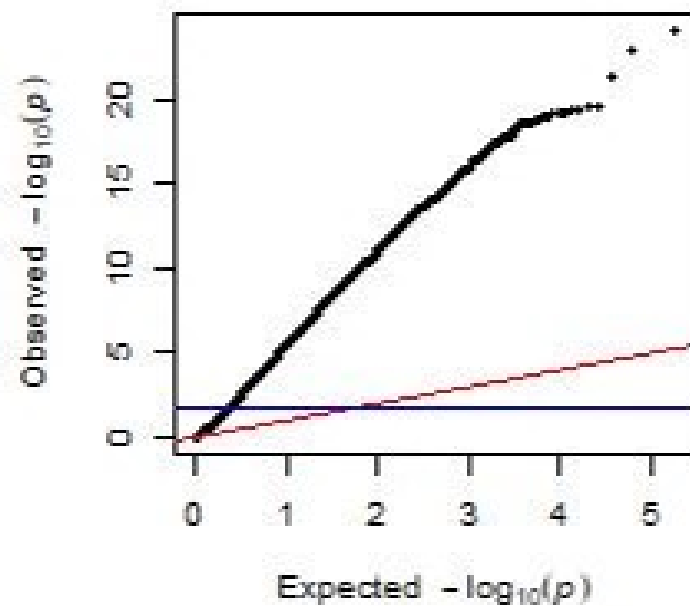

Accounting only for structure

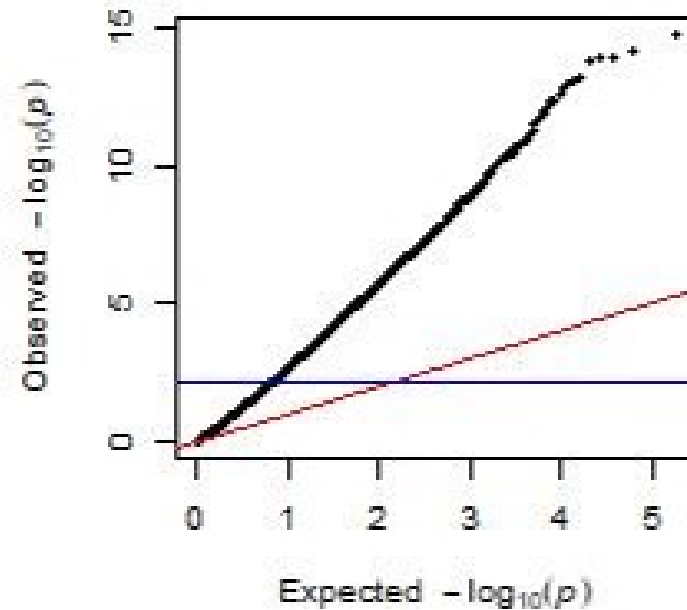

Accounting only for kinship

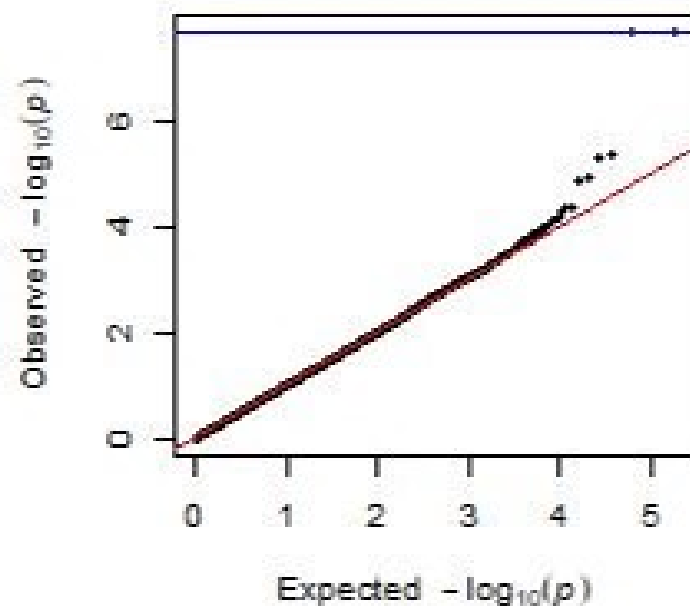

Accounting for kinship and structure

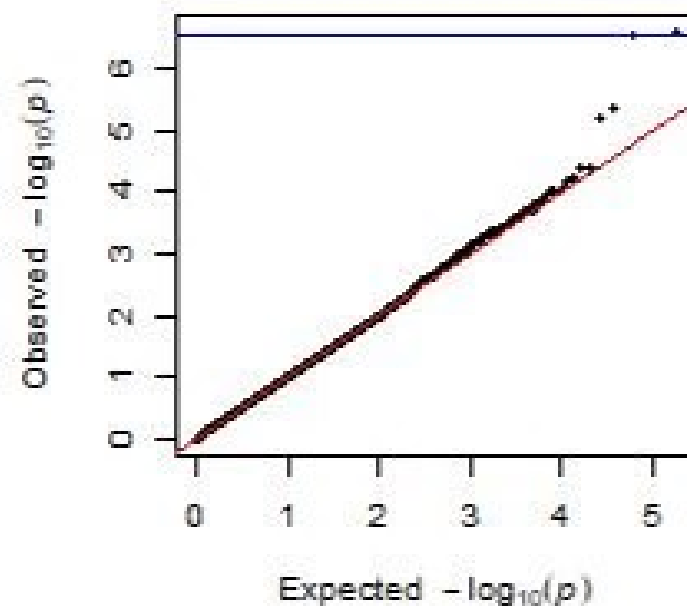



# trait: CHs500\_lu16

No accounting for kinship or structure

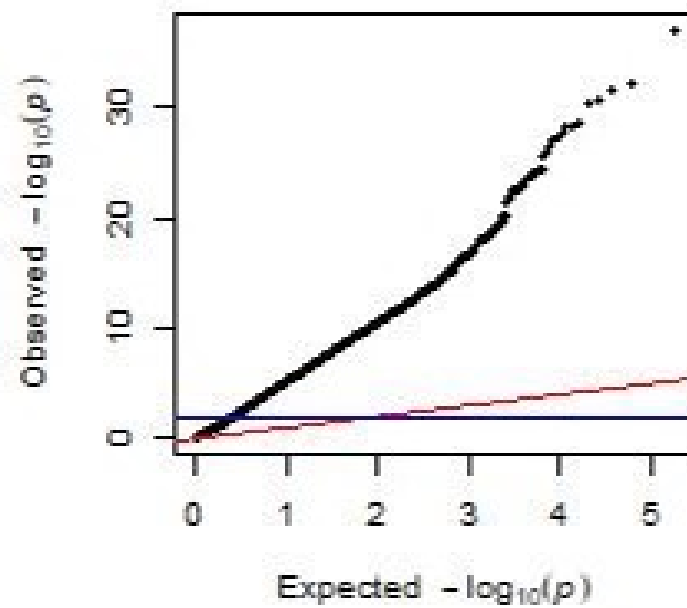

Accounting only for structure

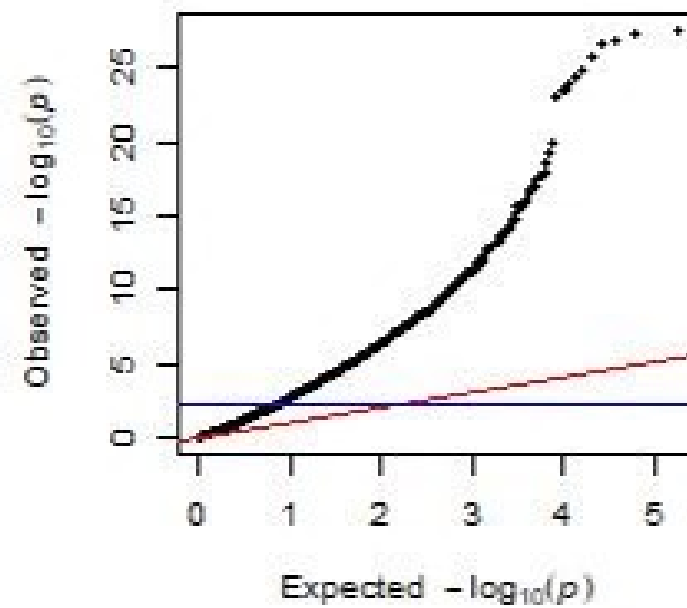

Accounting only for kinship

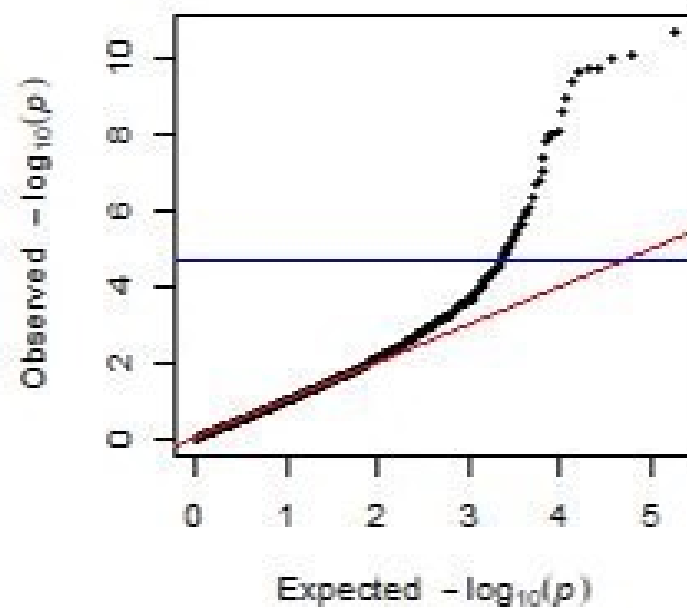

Accounting for kinship and structure

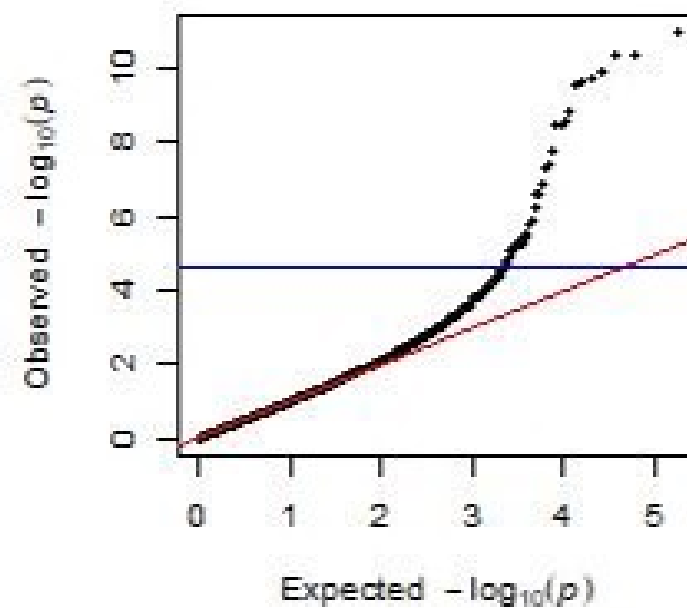

# trait: CHs500\_lu17

No accounting for kinship or structure

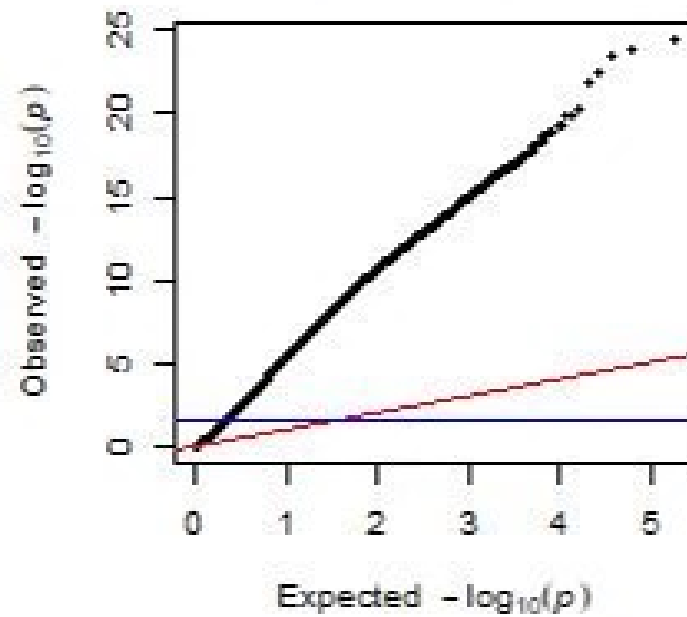

Accounting only for structure

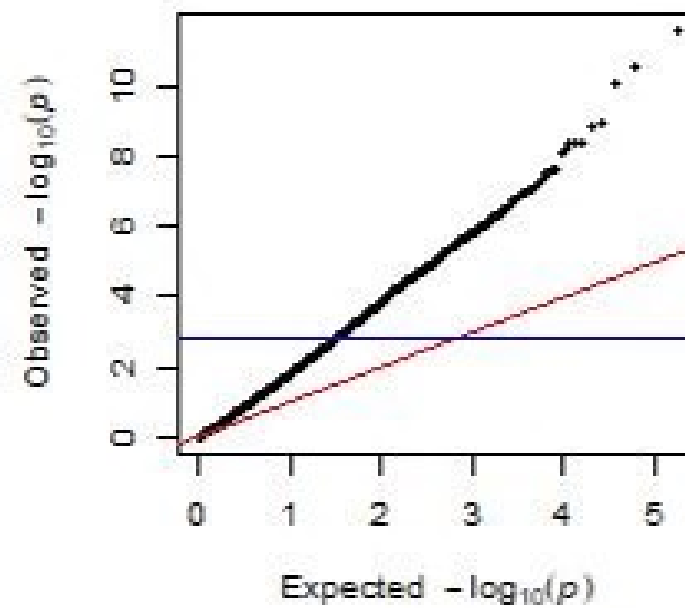

Accounting only for kinship

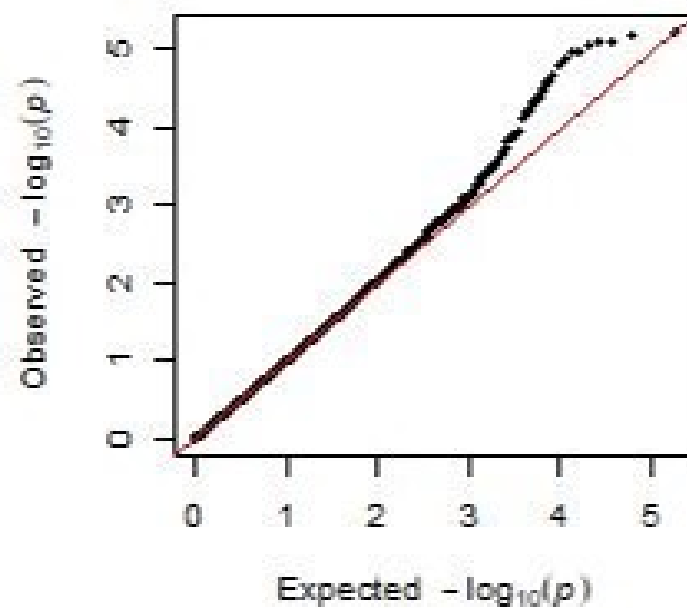

Accounting for kinship and structure

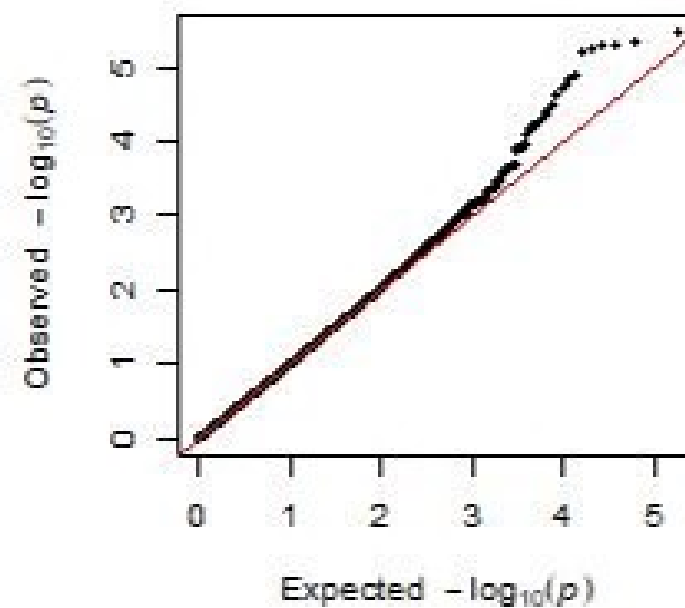

# trait: CHs500\_me16

No accounting for kinship or structure

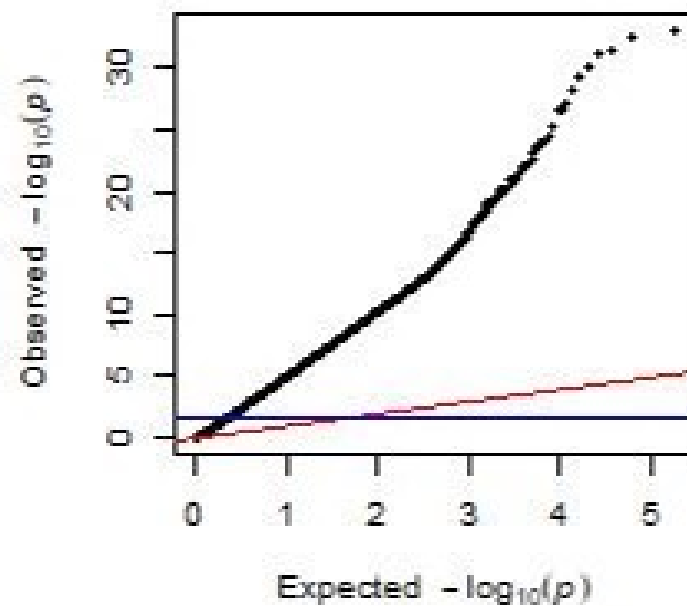

Accounting only for structure

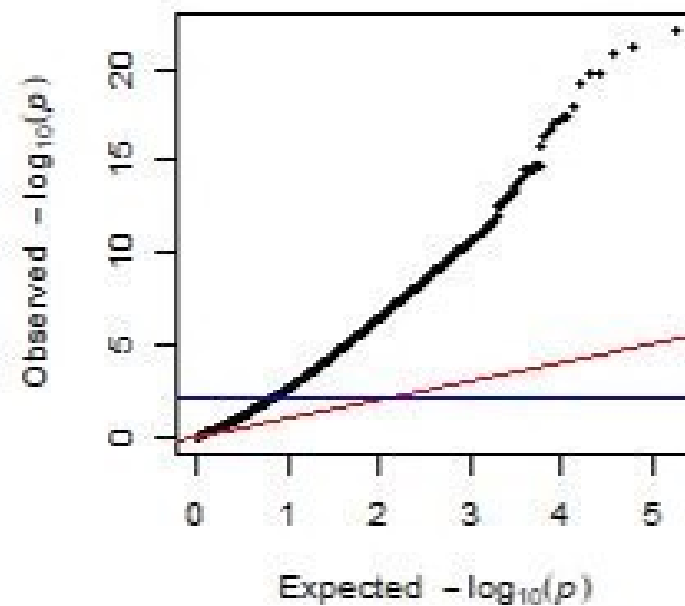

Accounting only for kinship

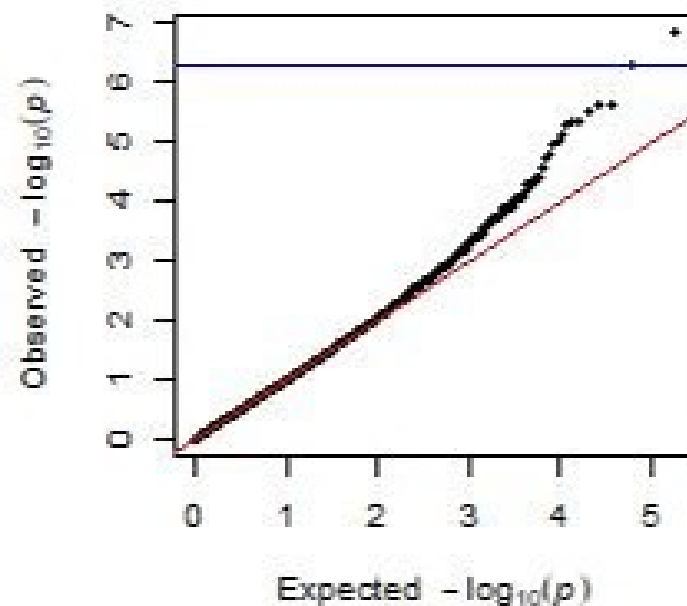

Accounting for kinship and structure

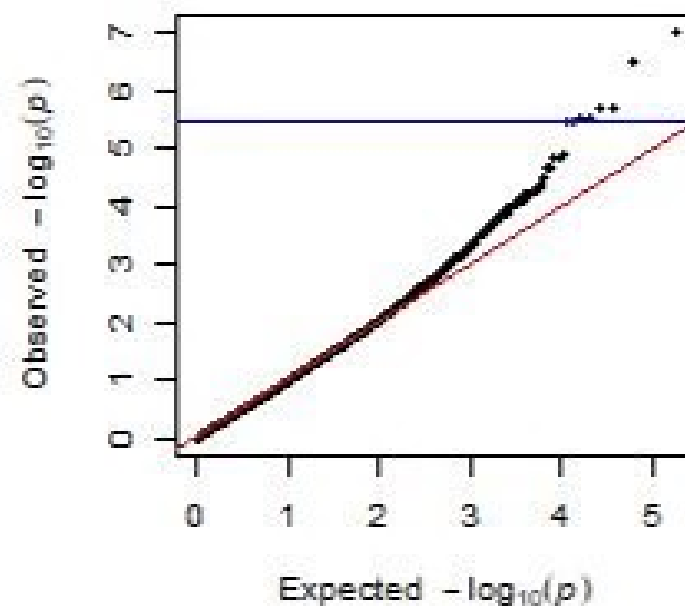

# trait: CHs500\_me17

No accounting for kinship or structure

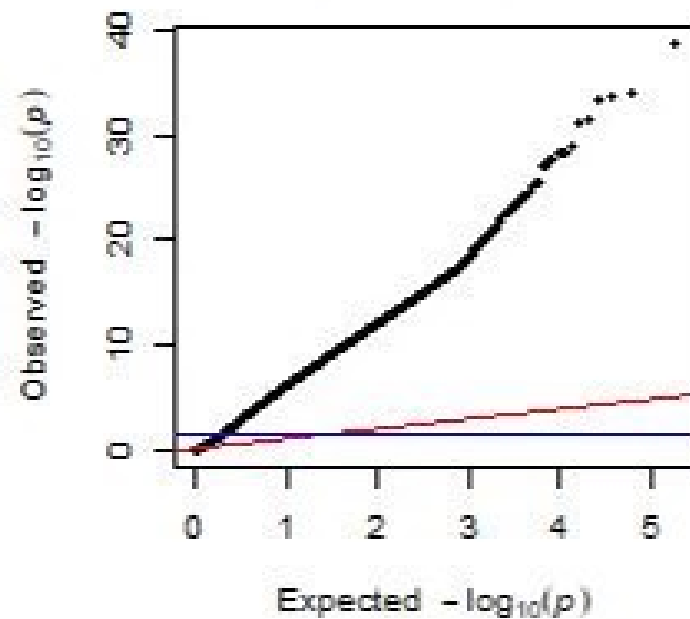

Accounting only for structure

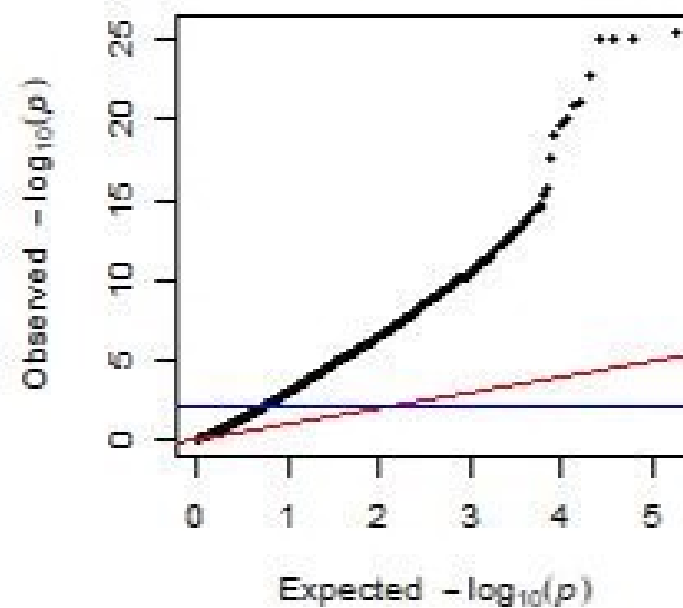

Accounting only for kinship

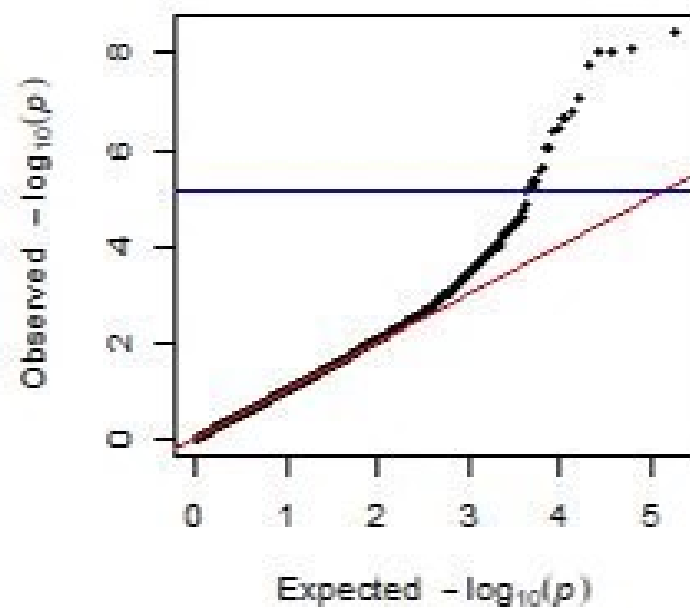

Accounting for kinship and structure

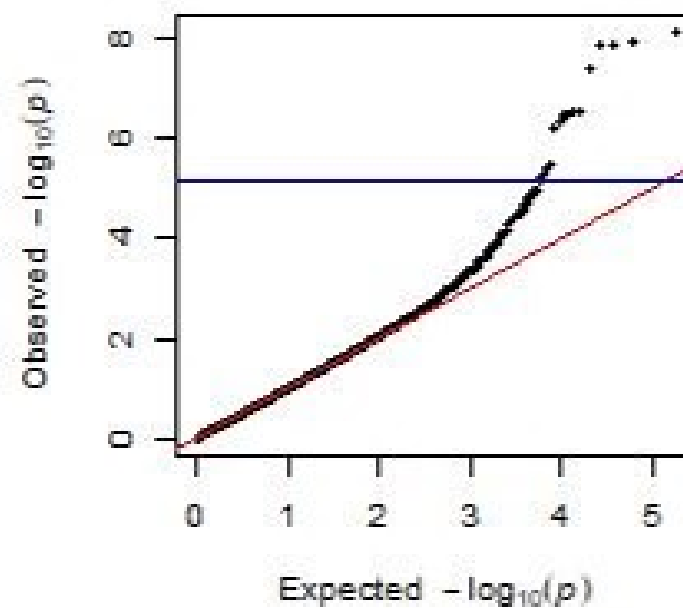

# trait: CHs500\_po17

No accounting for kinship or structure

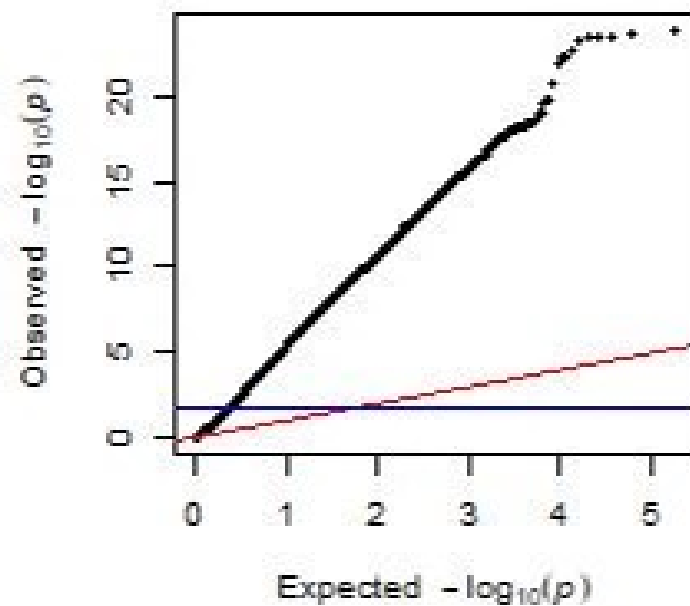

Accounting only for structure

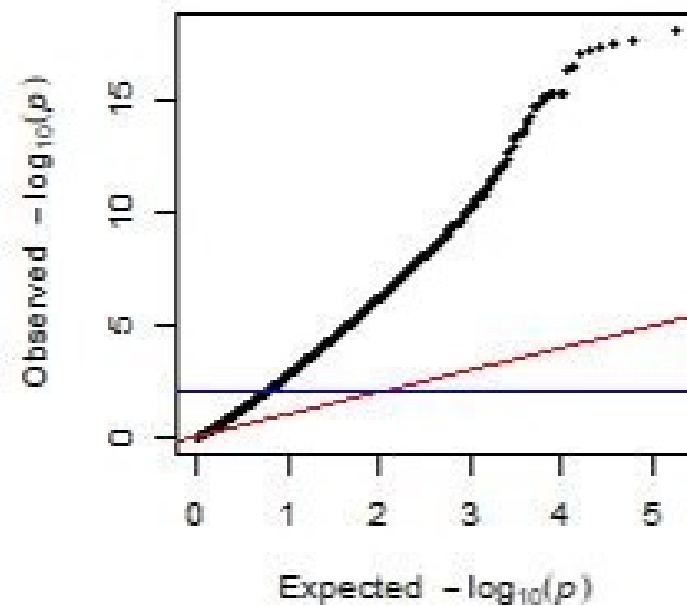

Accounting only for kinship

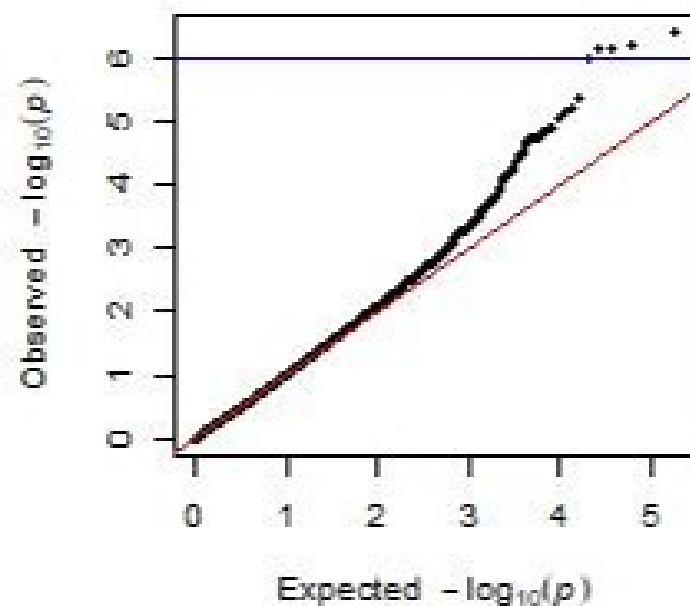

Accounting for kinship and structure

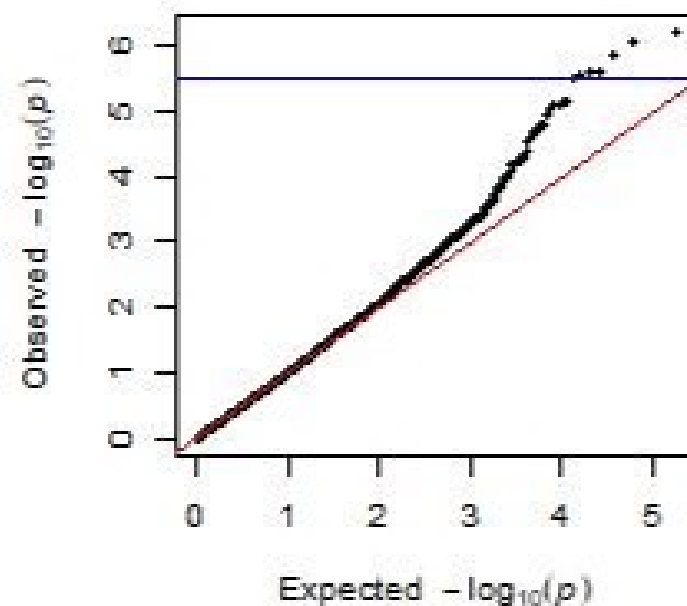

# trait: DES\_po15

No accounting for kinship or structure

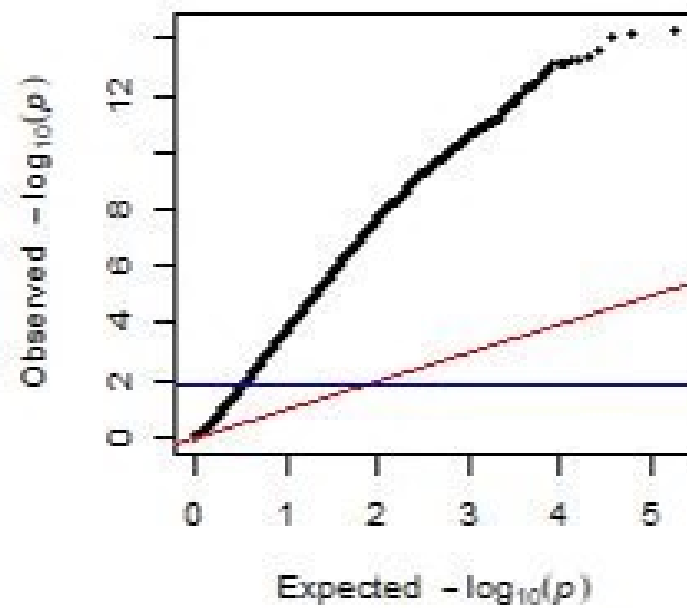

Accounting only for structure

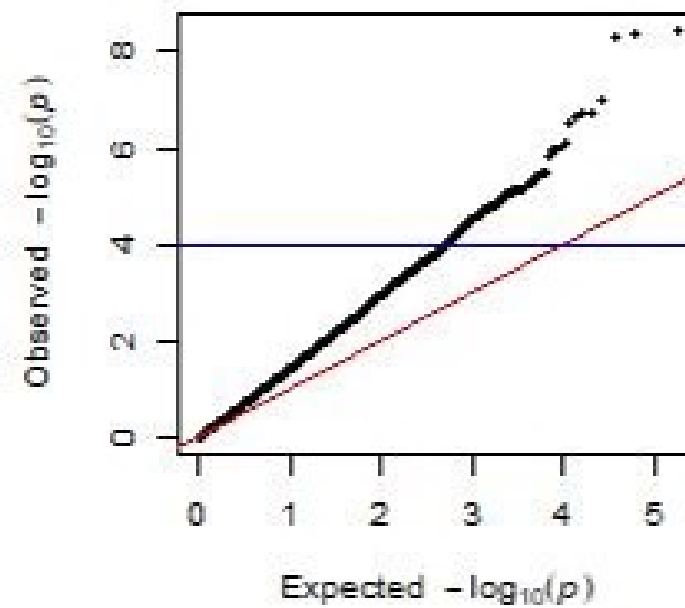

Accounting only for kinship

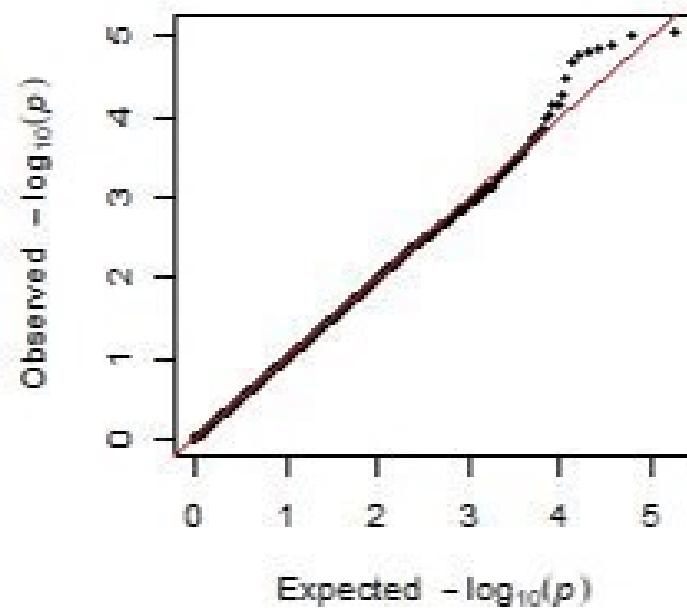

Accounting for kinship and structure

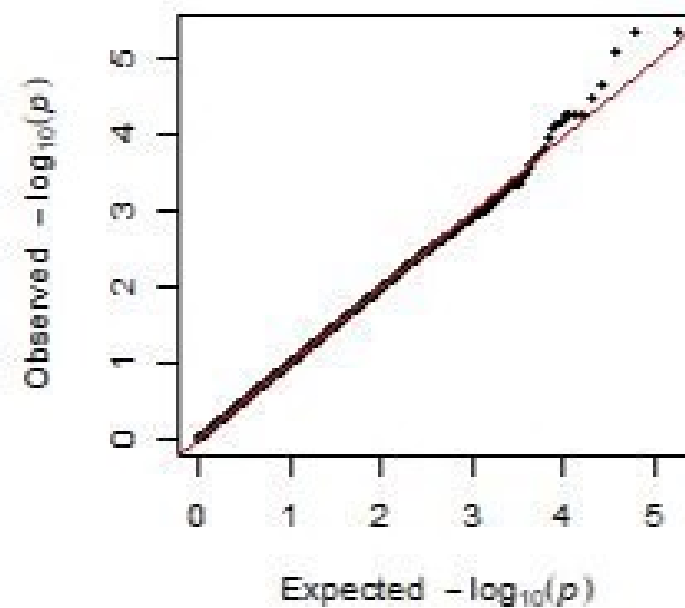

# trait: DHE\_01\_lu17

No accounting for kinship or structure

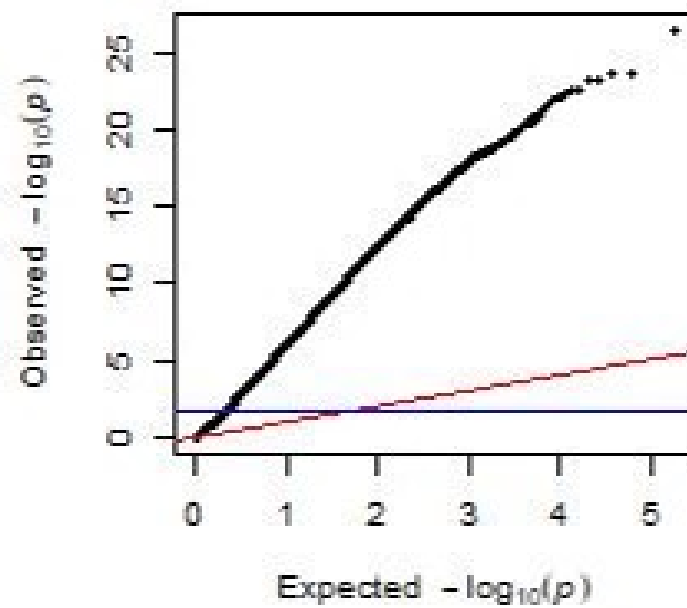

Accounting only for structure

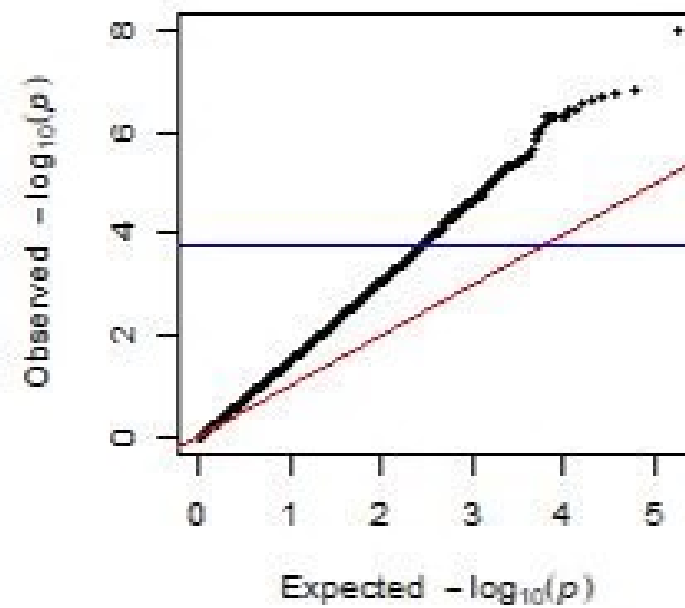

Accounting only for kinship

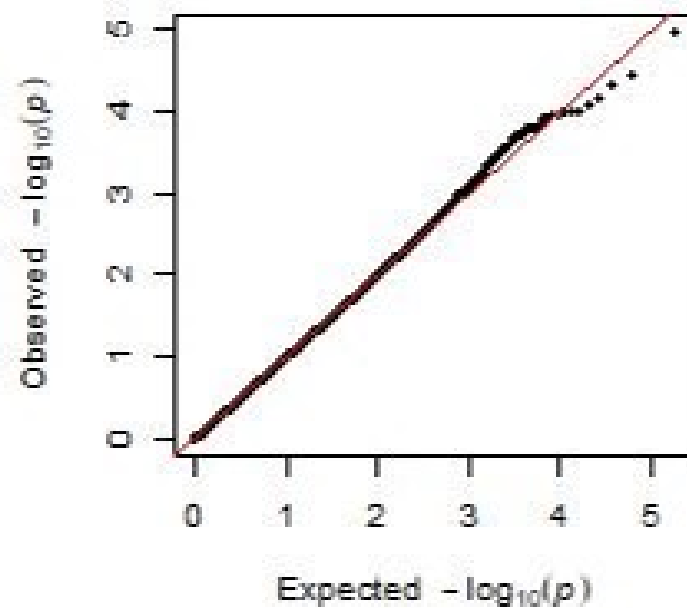

Accounting for kinship and structure

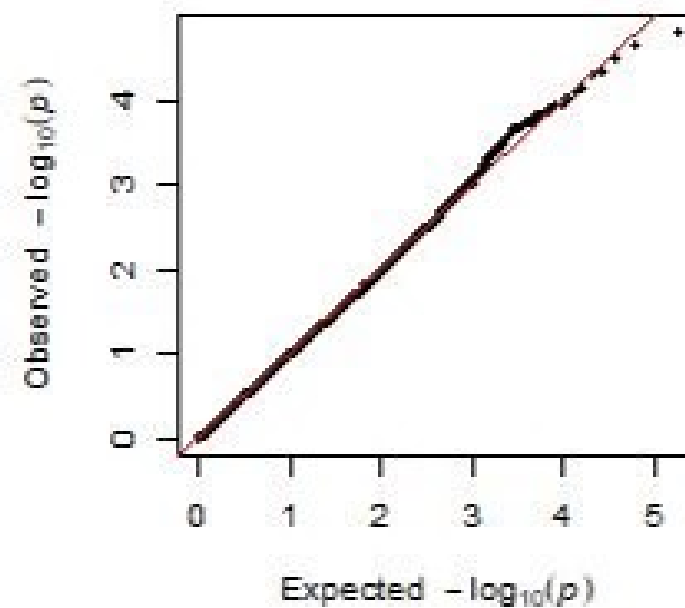

# trait: DHE\_04\_lu17

No accounting for kinship or structure

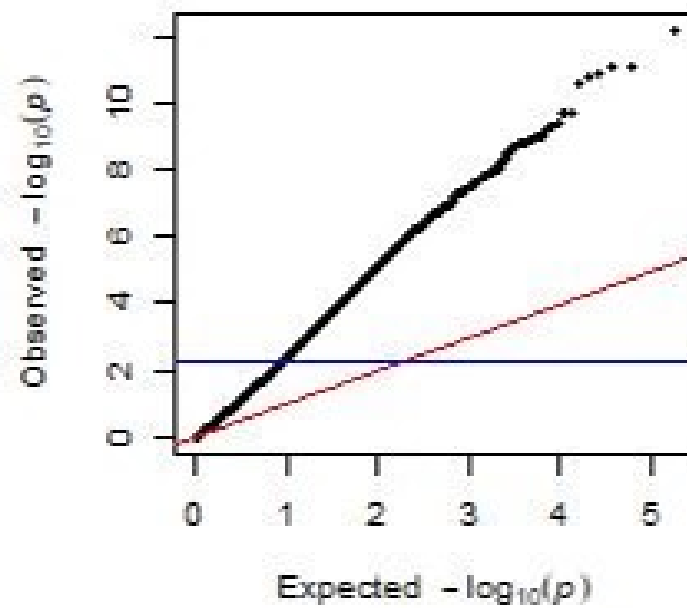

Accounting only for structure

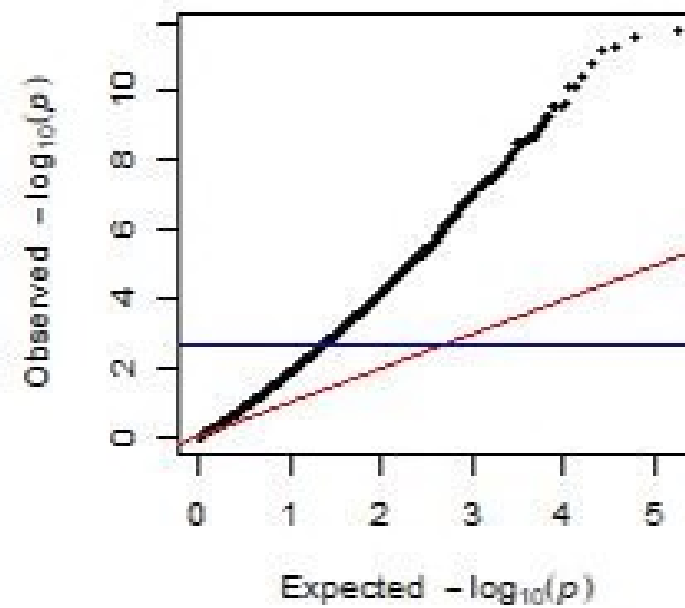

Accounting only for kinship

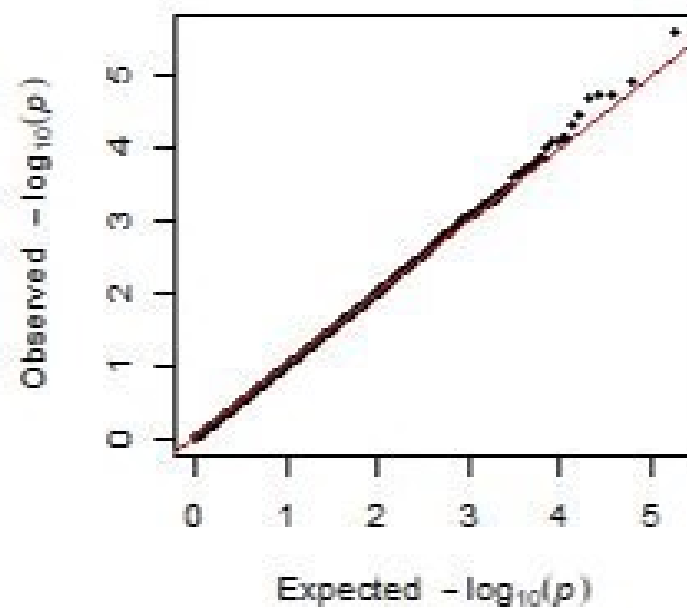

Accounting for kinship and structure

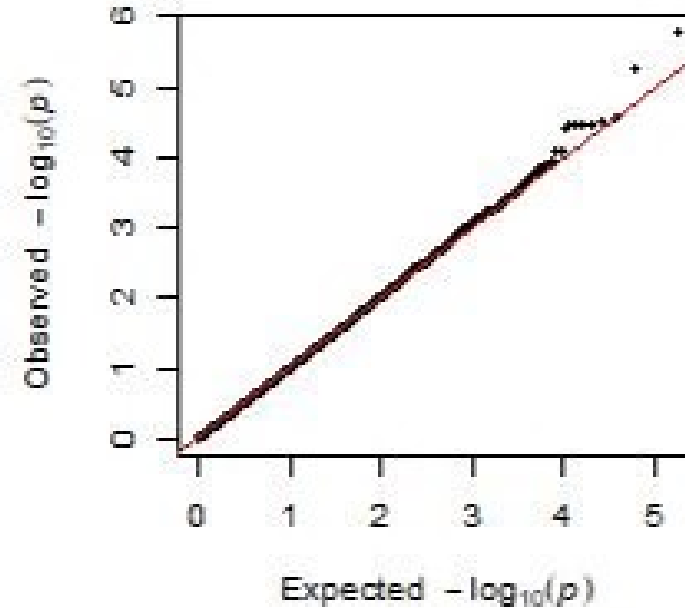



# trait: DHE\_07\_lu16

No accounting for kinship or structure

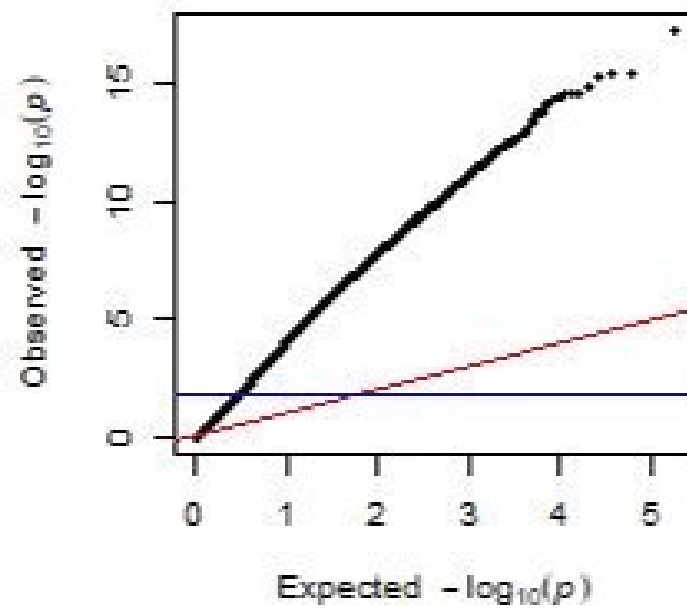

Accounting only for structure

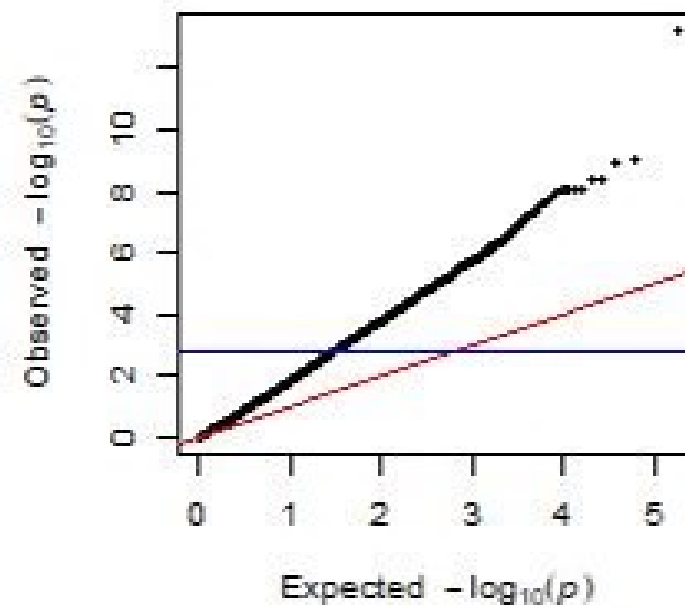

Accounting only for kinship

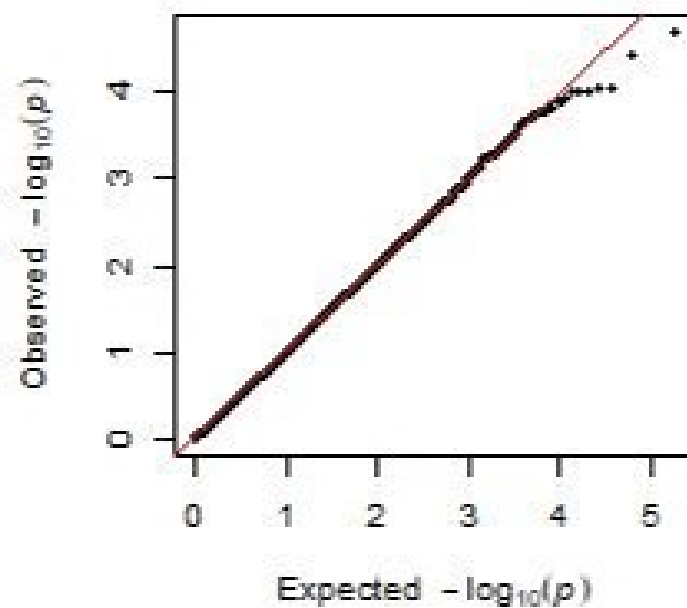

Accounting for kinship and structure

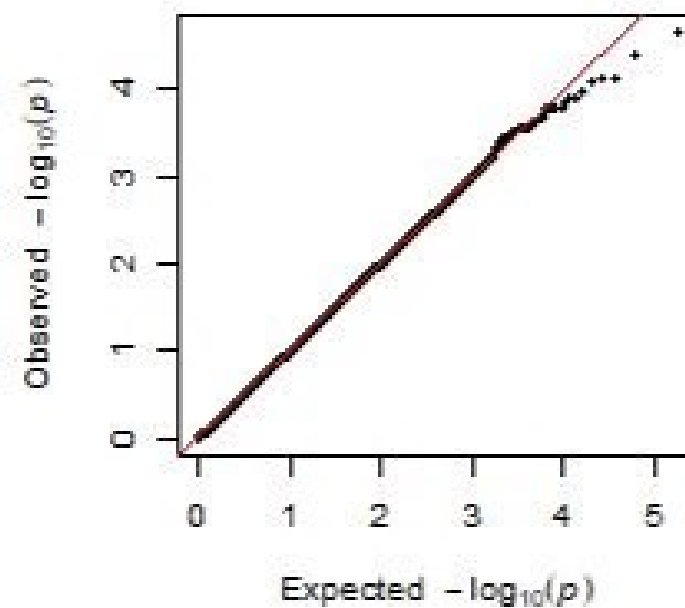

# trait: DIS\_avg

No accounting for kinship or structure

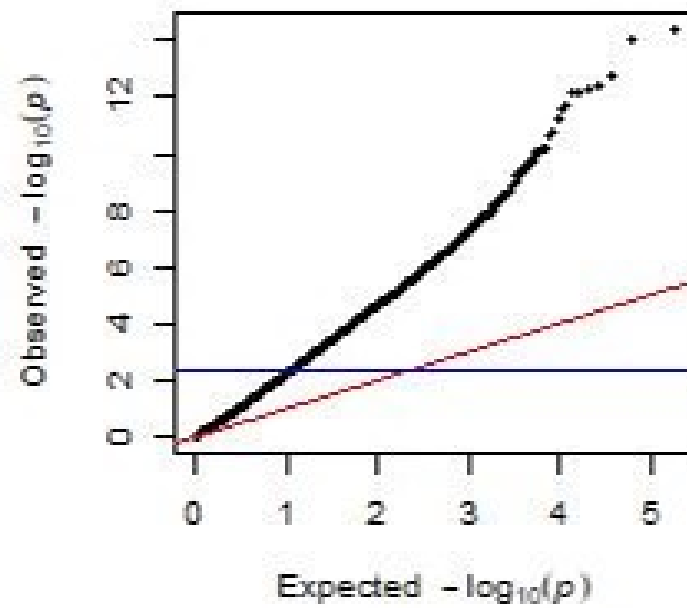

Accounting only for structure

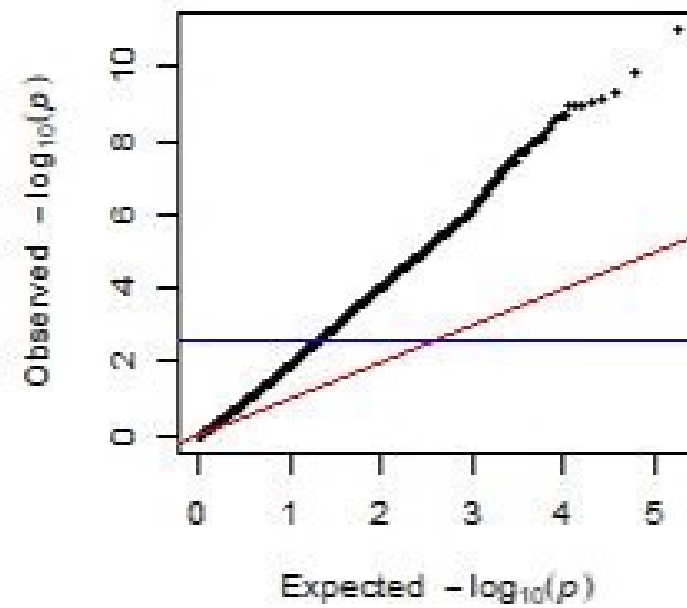

Accounting only for kinship

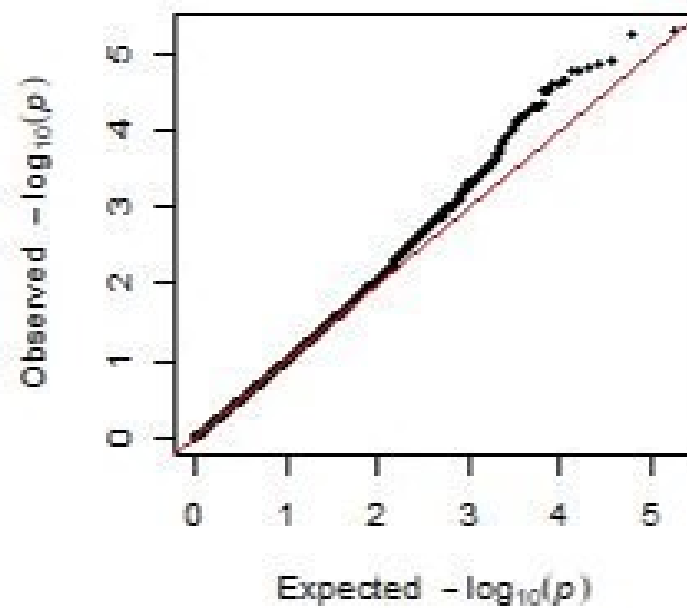

Accounting for kinship and structure

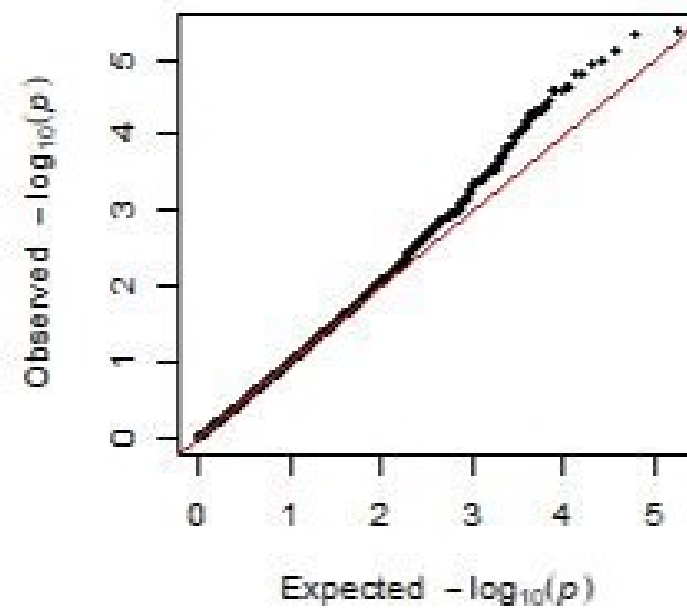

# trait: DIS\_lu15

No accounting for kinship or structure

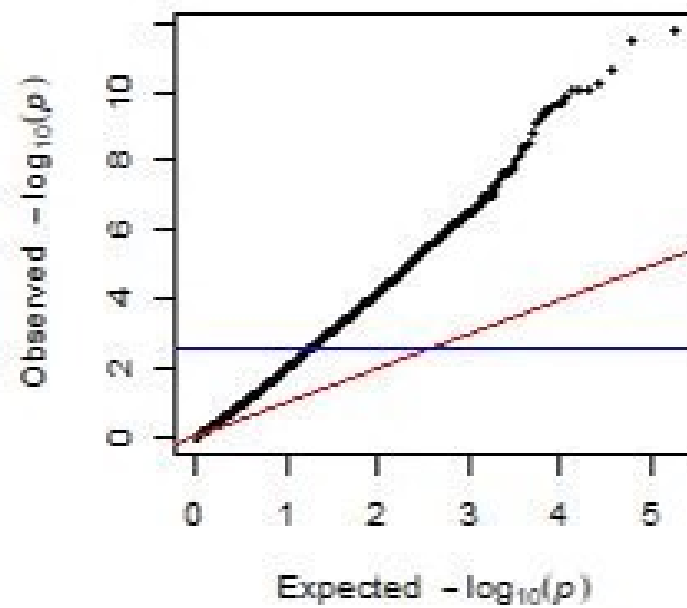

Accounting only for structure

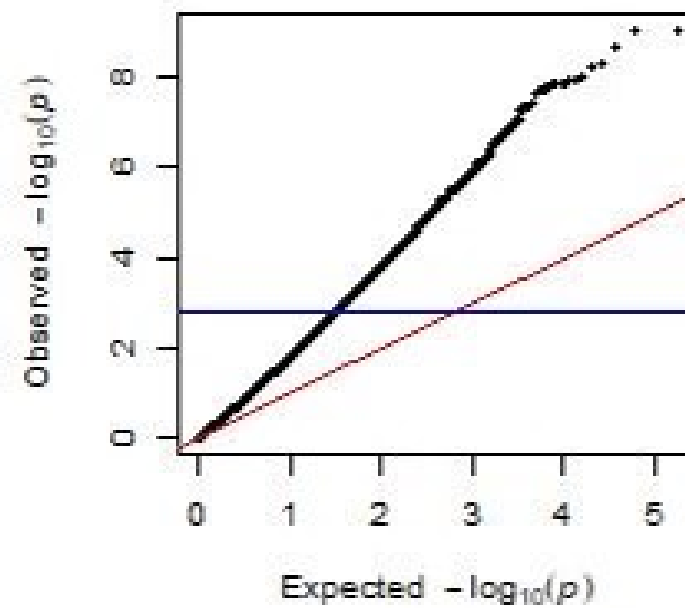

Accounting only for kinship

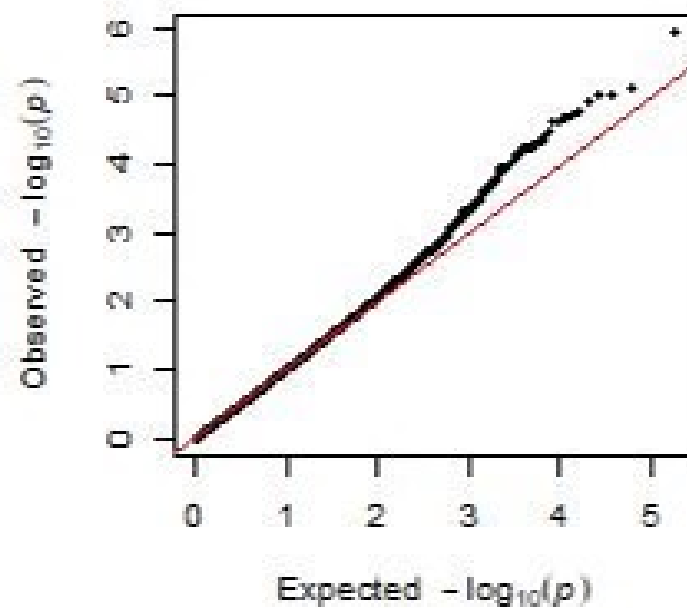

Accounting for kinship and structure

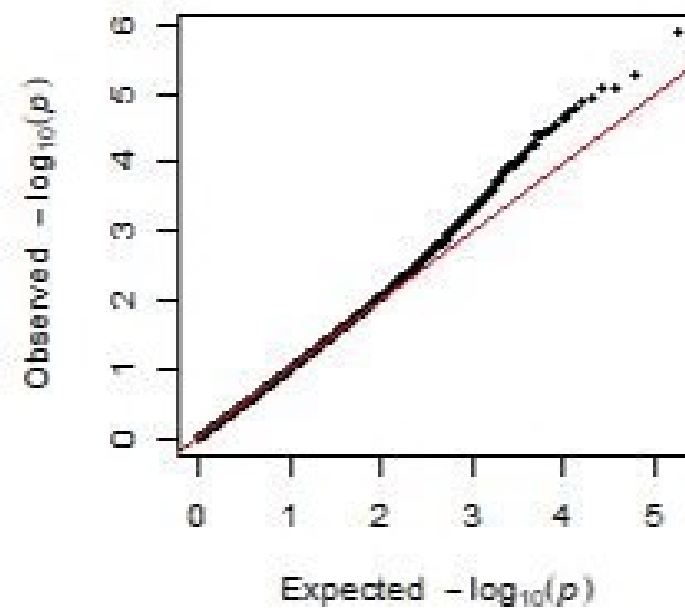

# trait: DIS\_lu16

No accounting for kinship or structure

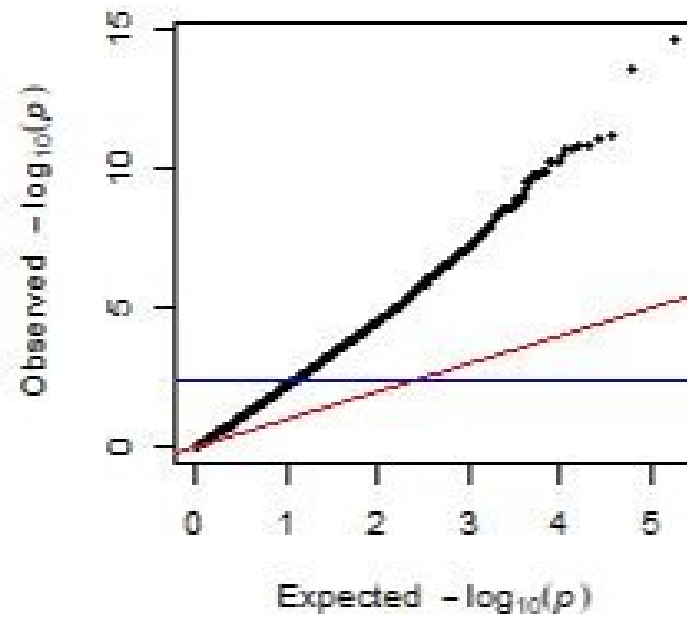

Accounting only for structure

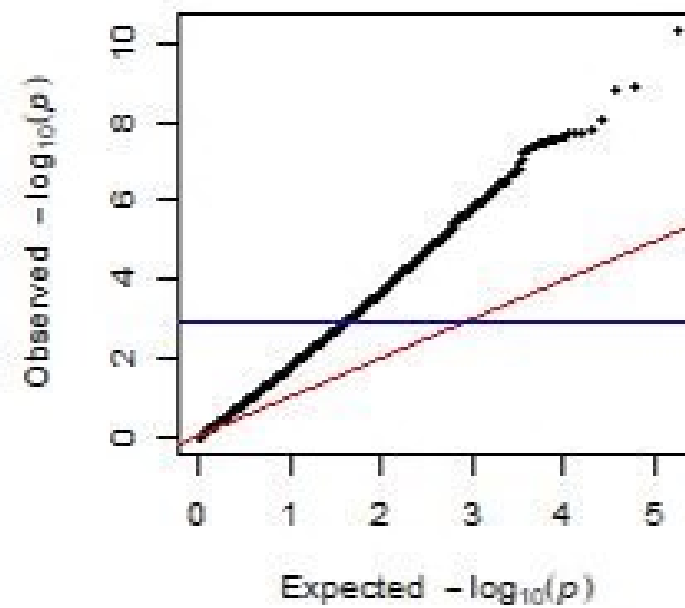

Accounting only for kinship

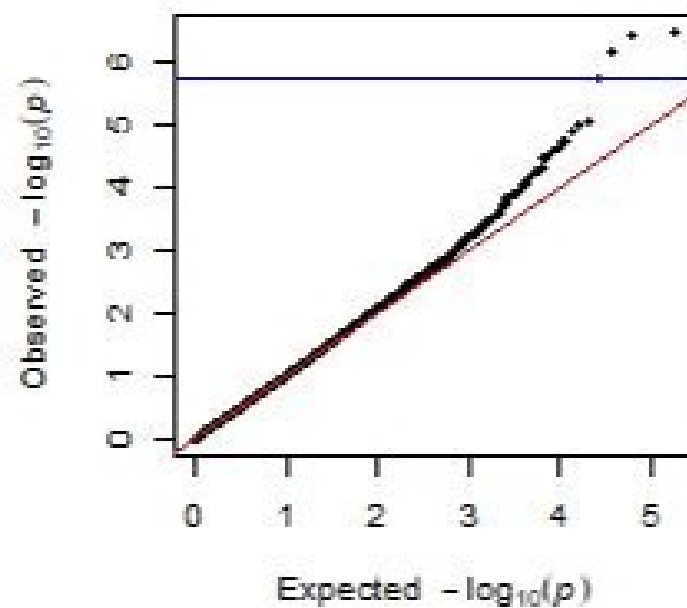

Accounting for kinship and structure

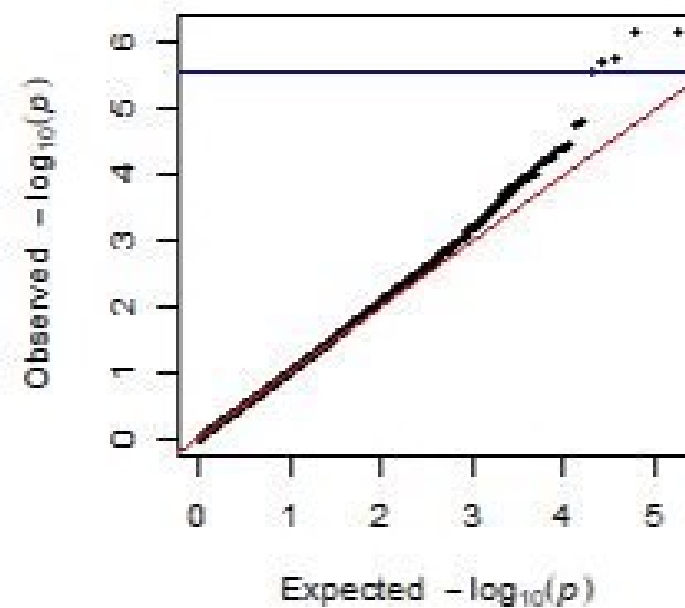

# trait: DIS\_lu17

No accounting for kinship or structure

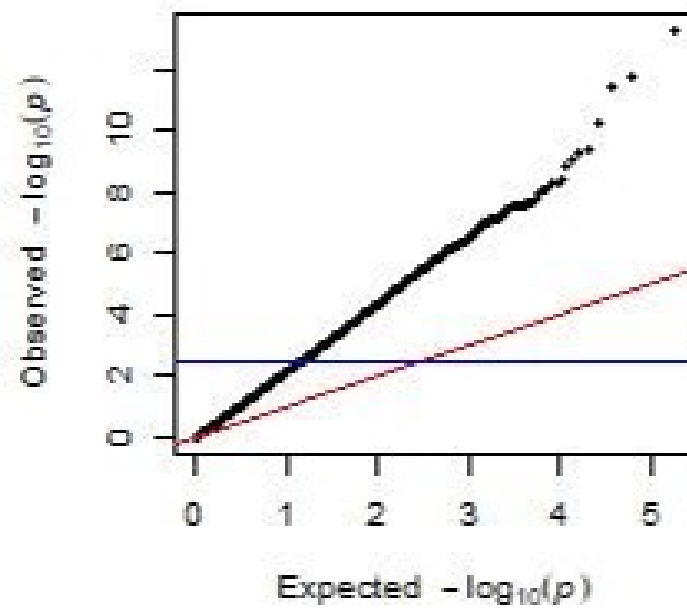

Accounting only for structure

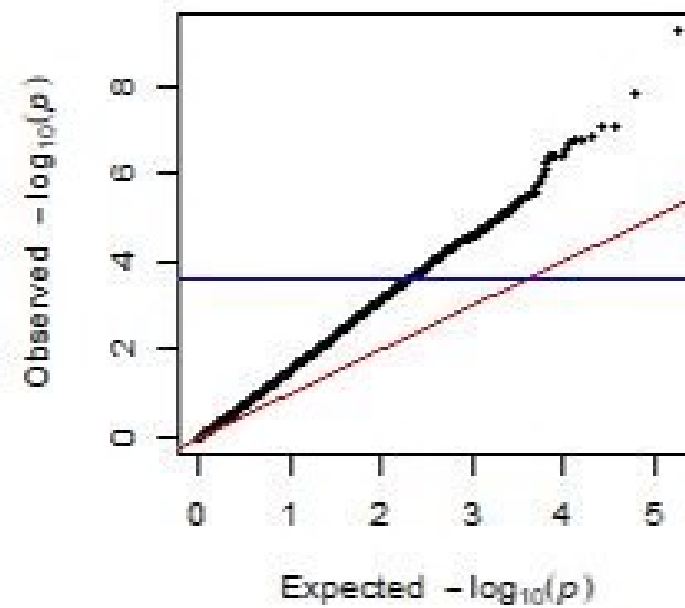

Accounting only for kinship

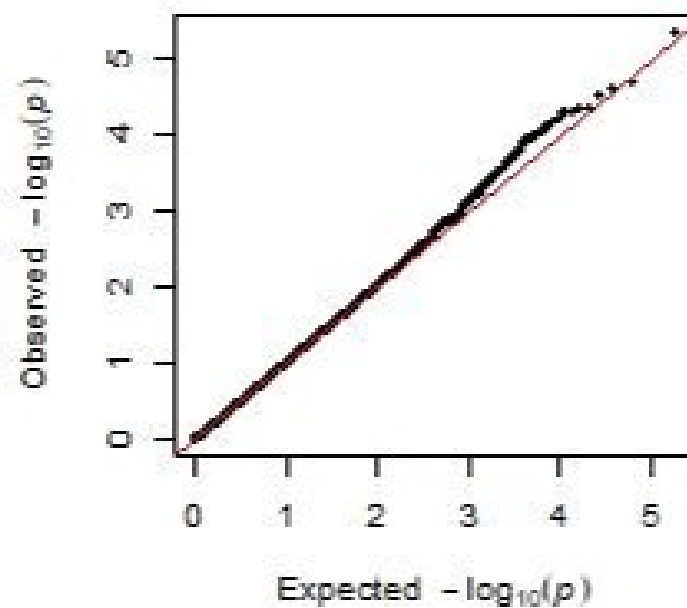

Accounting for kinship and structure

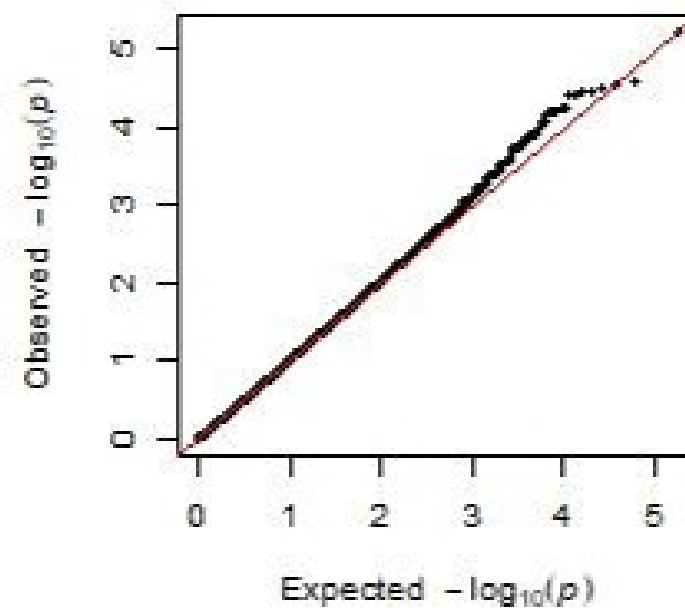

# trait: DIS\_me16

No accounting for kinship or structure

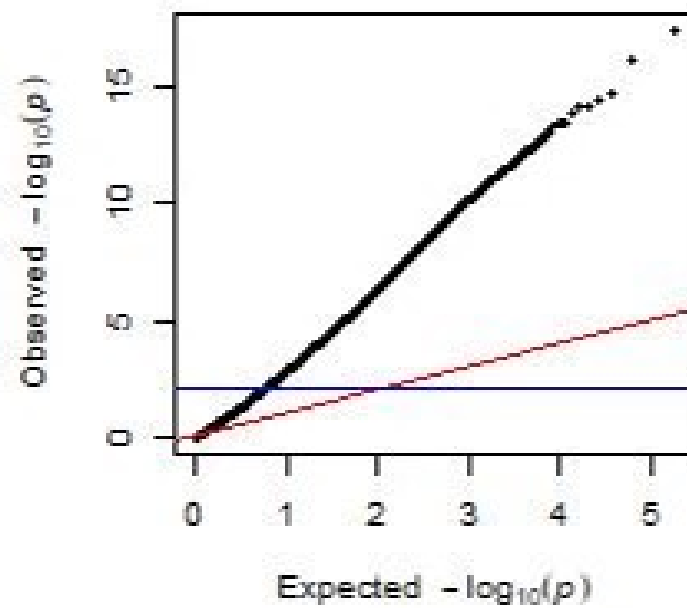

Accounting only for structure

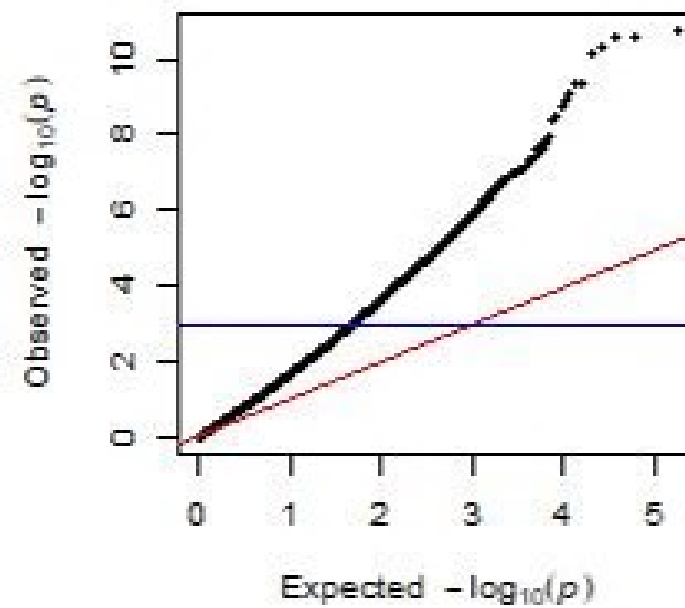

Accounting only for kinship

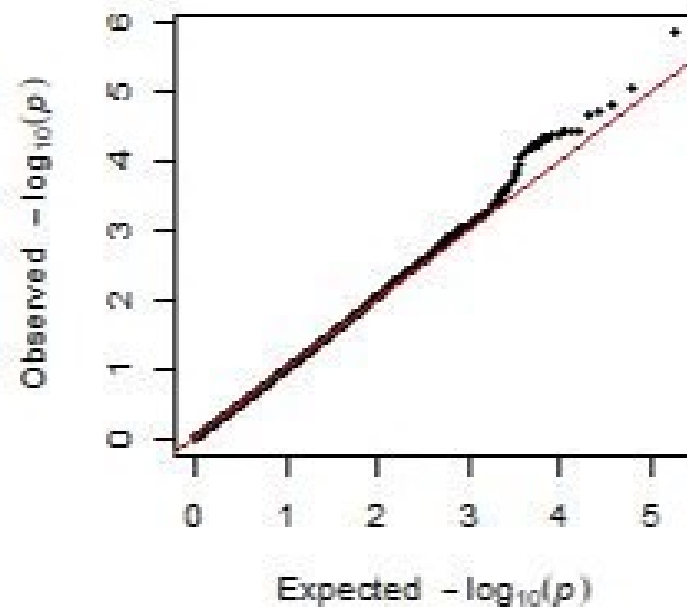

Accounting for kinship and structure

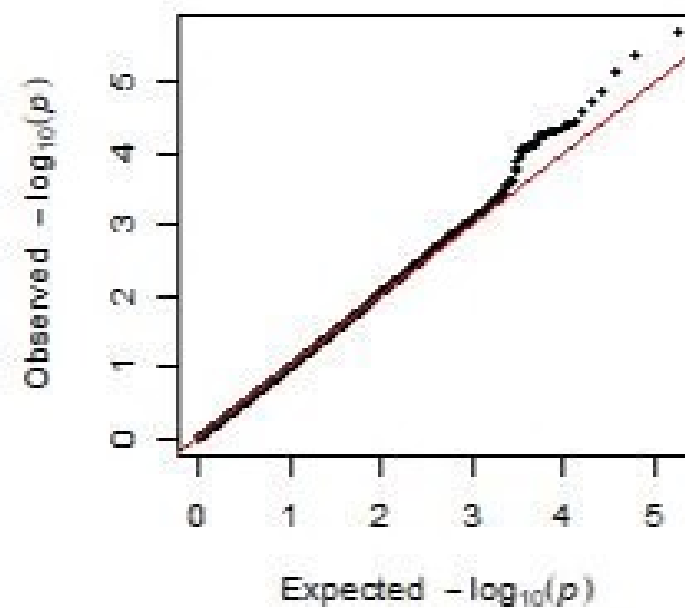

# trait: DIS\_me17

No accounting for kinship or structure

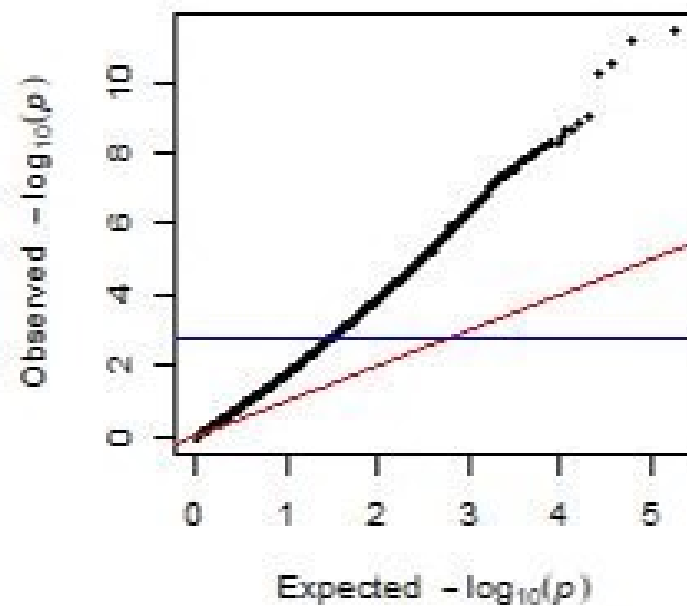

Accounting only for structure

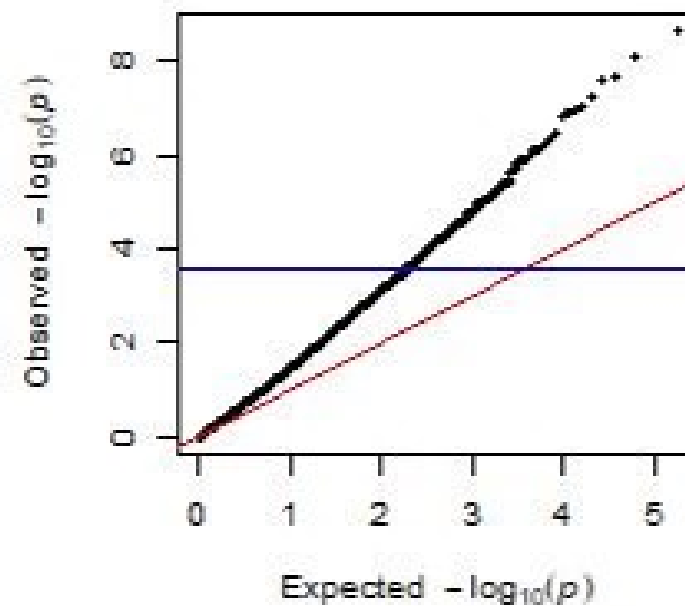

Accounting only for kinship

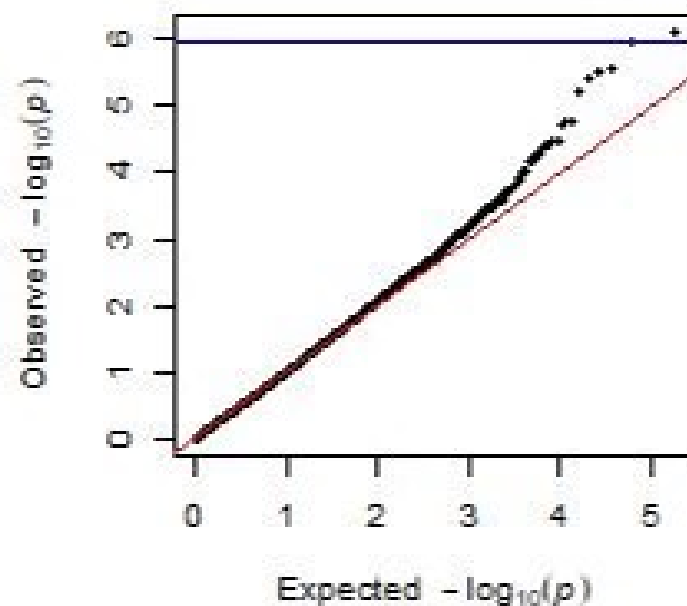

Accounting for kinship and structure

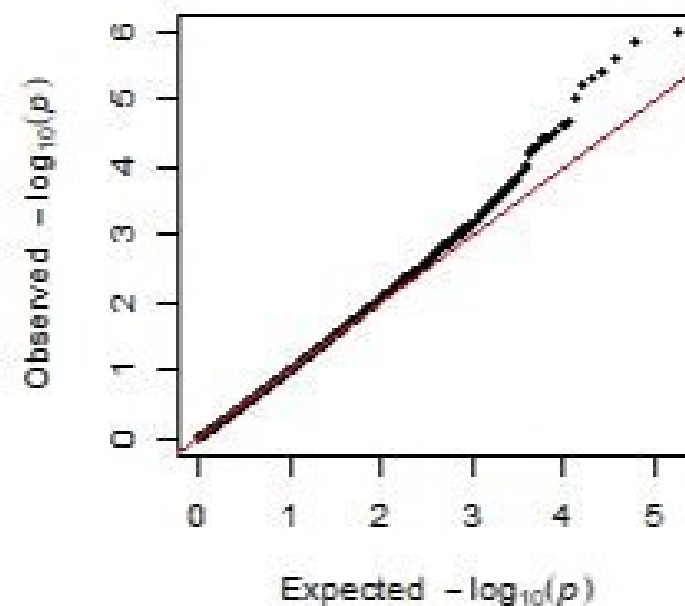

# trait: DIS\_po15

No accounting for kinship or structure

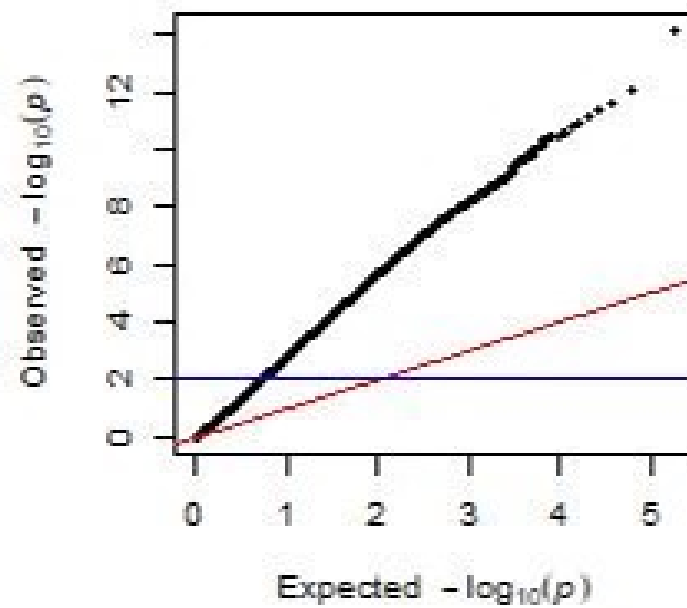

Accounting only for structure

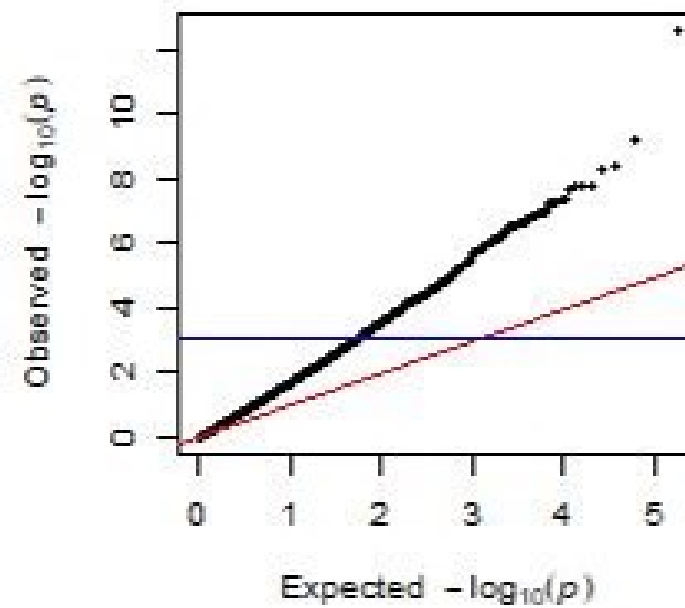

Accounting only for kinship

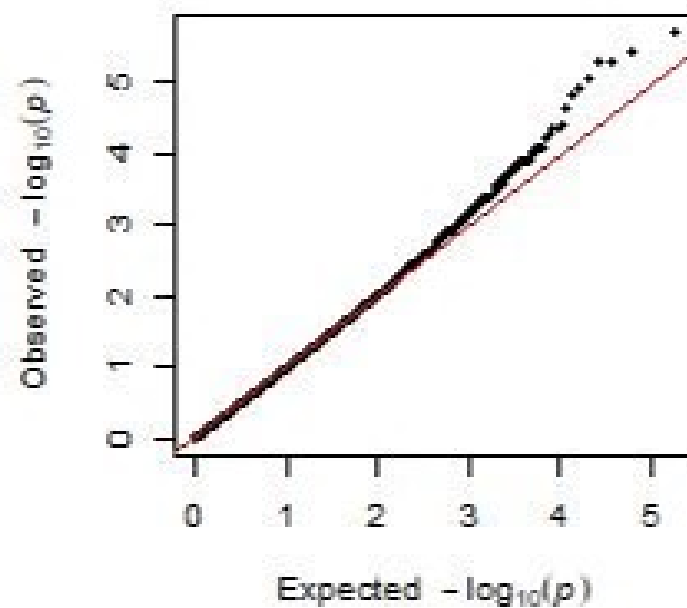

Accounting for kinship and structure

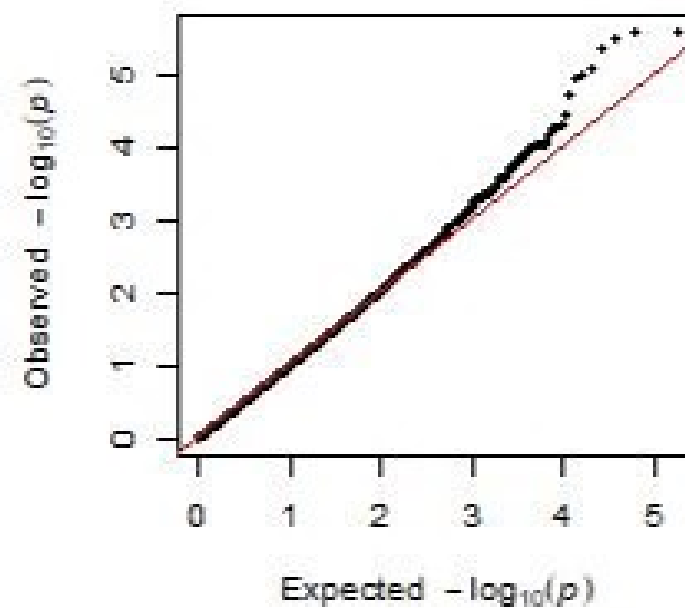



# trait: DIS\_po17

No accounting for kinship or structure

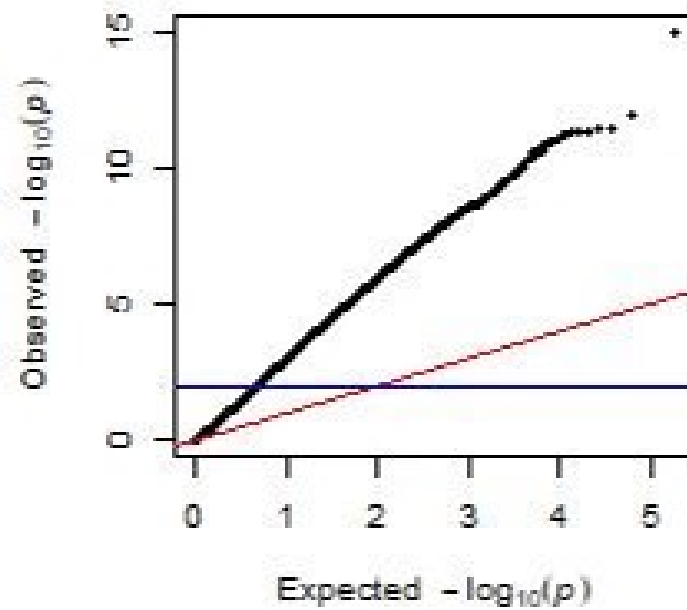

Accounting only for structure

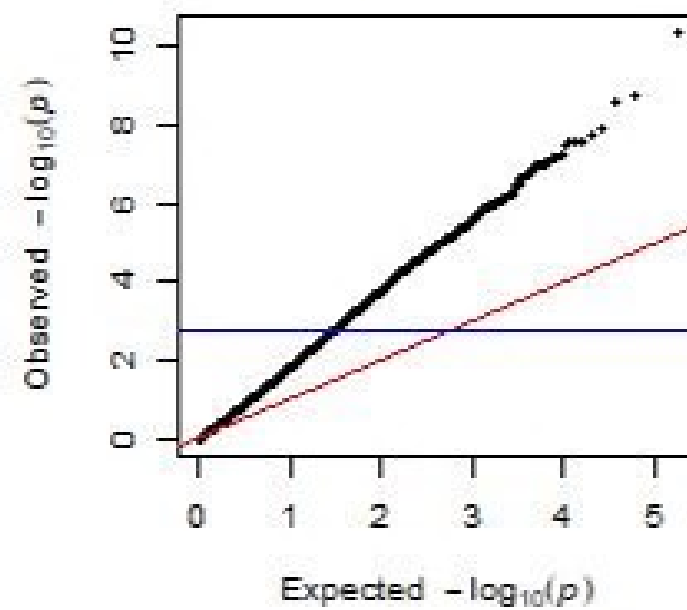

Accounting only for kinship

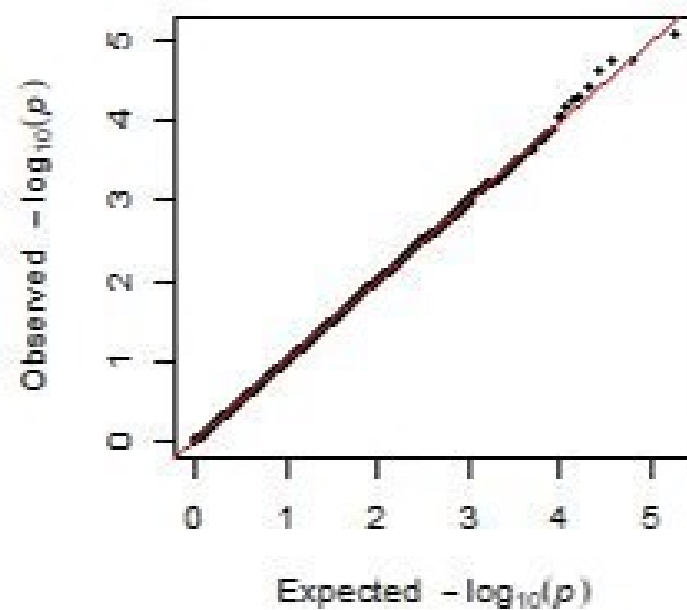

Accounting for kinship and structure

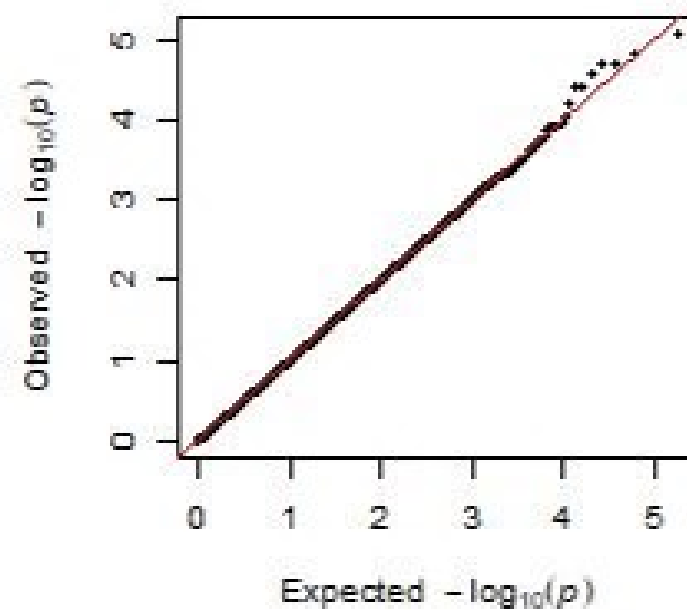

# trait: DNDF\_04\_me17

No accounting for kinship or structure

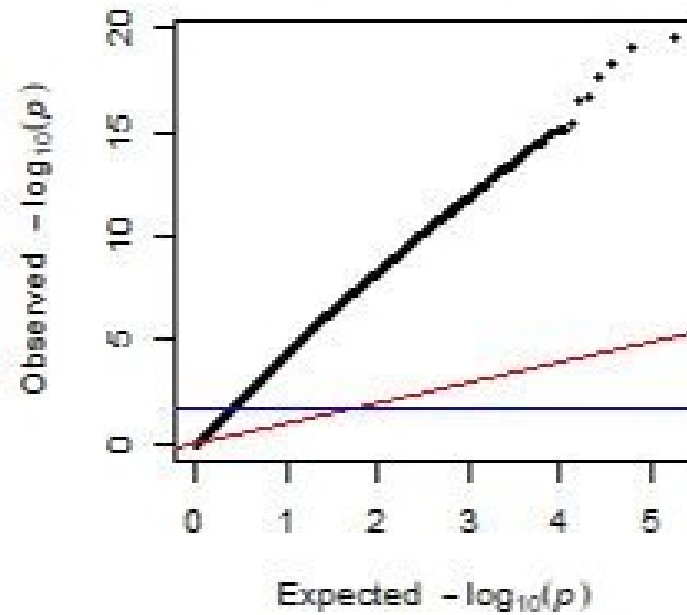

Accounting only for structure

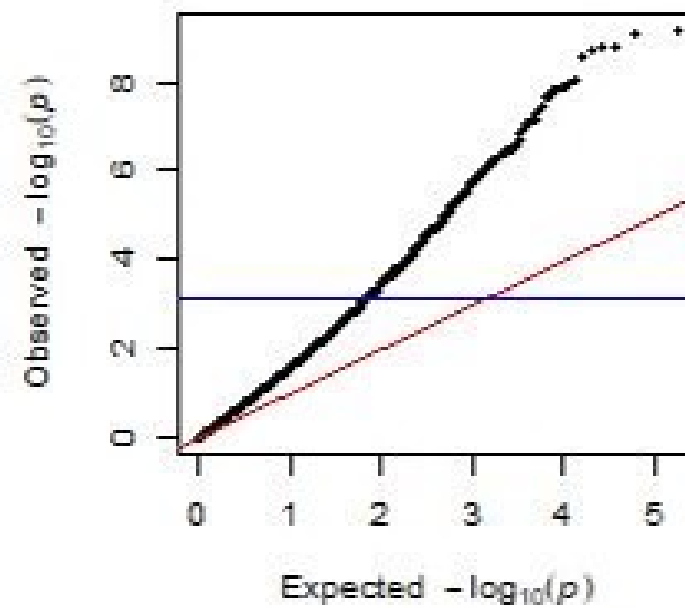

Accounting only for kinship

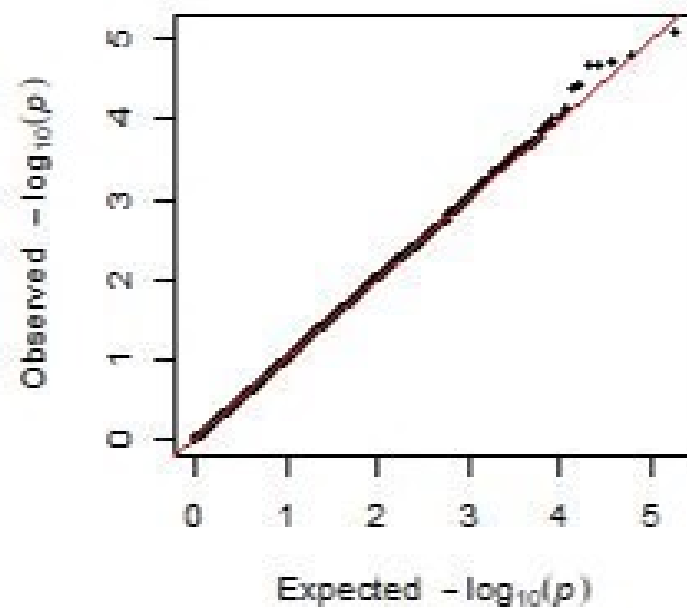

Accounting for kinship and structure

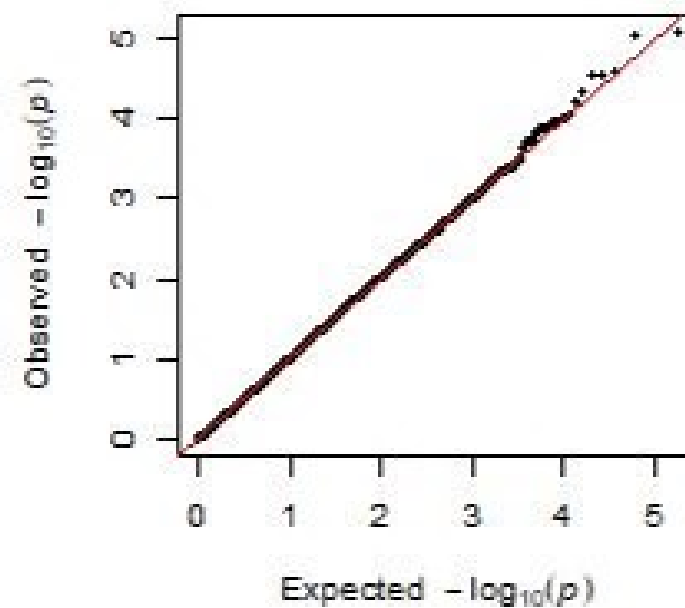

# trait: DNDF\_10\_me17

No accounting for kinship or structure

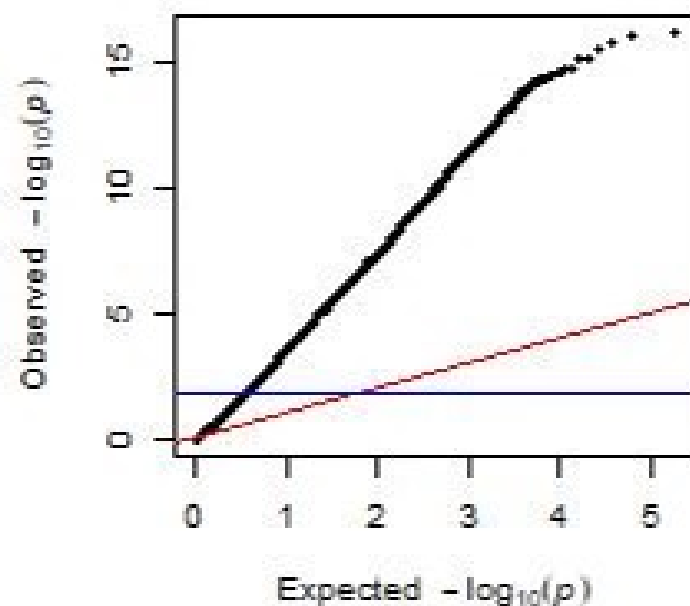

Accounting only for structure

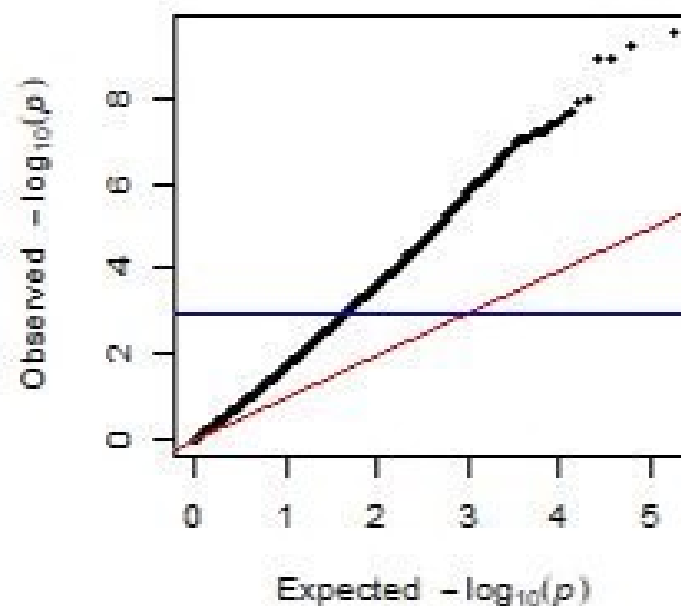

Accounting only for kinship

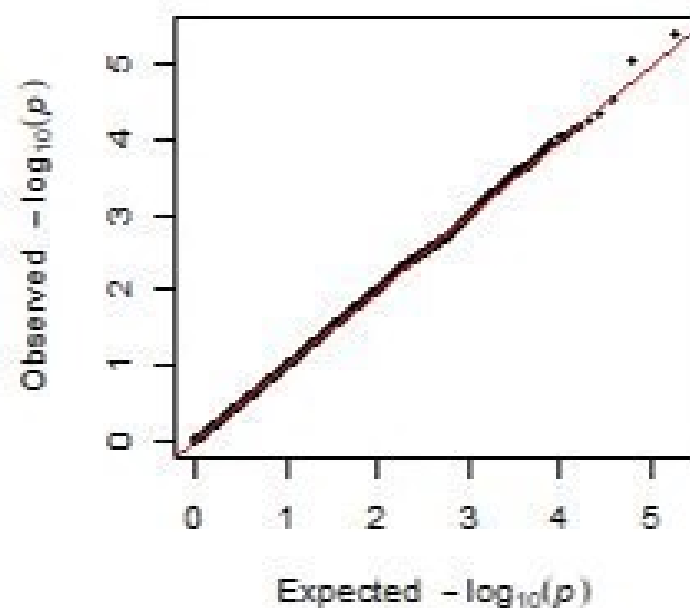

Accounting for kinship and structure

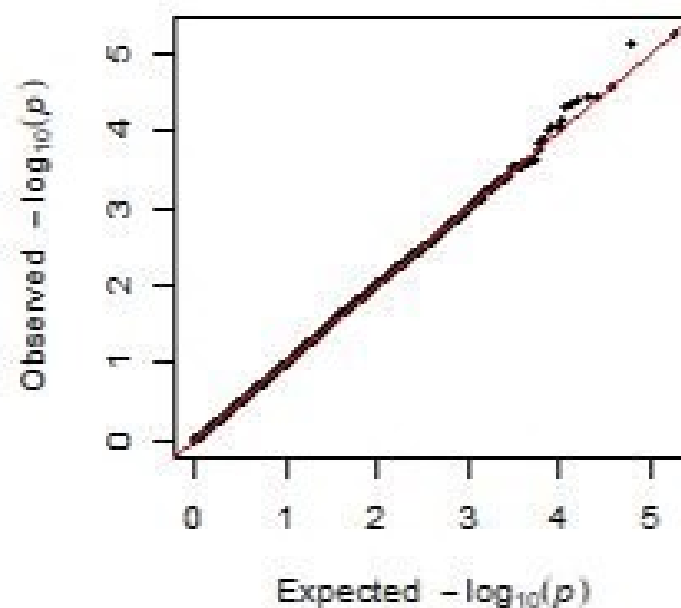

# trait: DNDF\_avg

No accounting for kinship or structure

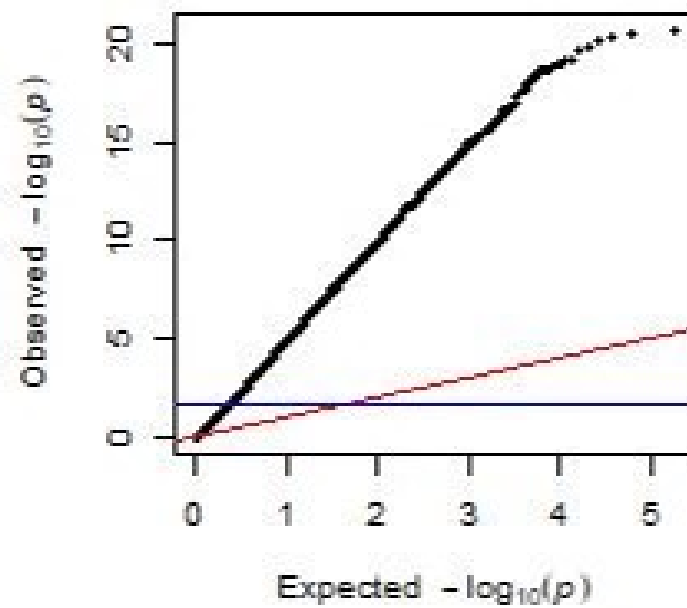

Accounting only for structure

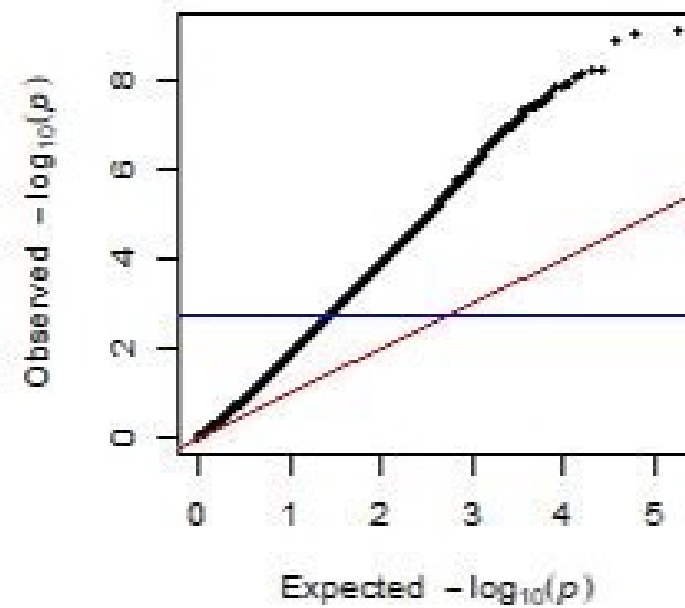

Accounting only for kinship

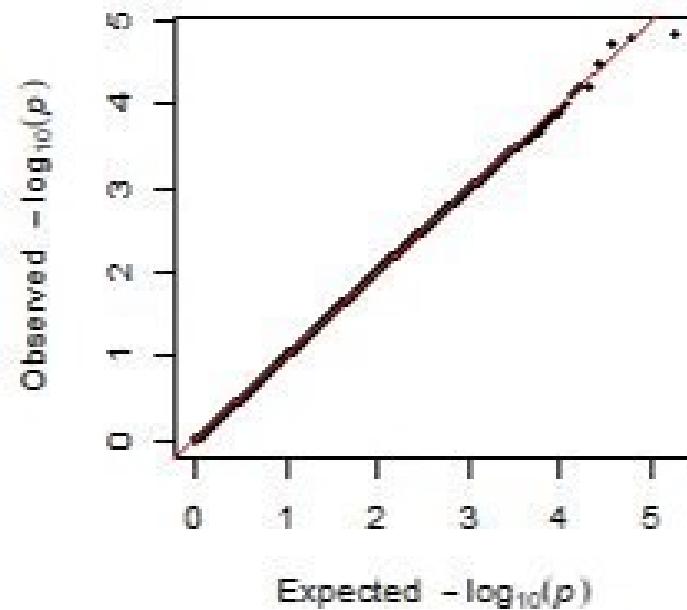

Accounting for kinship and structure

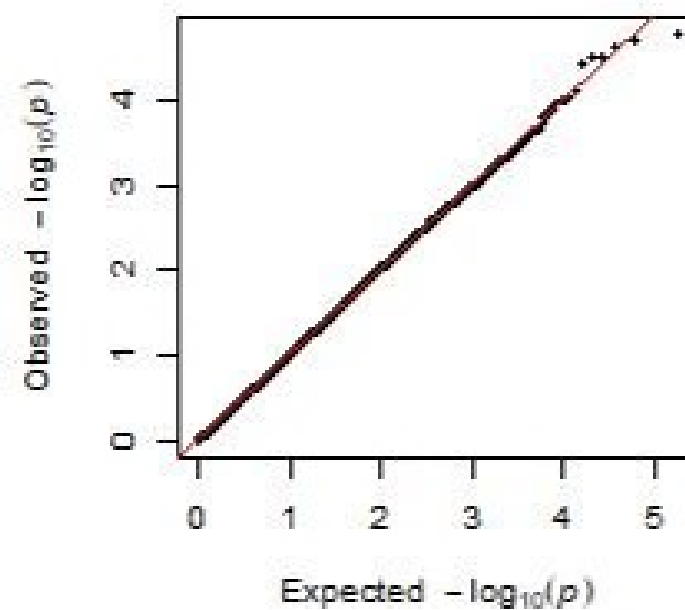

# trait: DRB\_lu1516

No accounting for kinship or structure

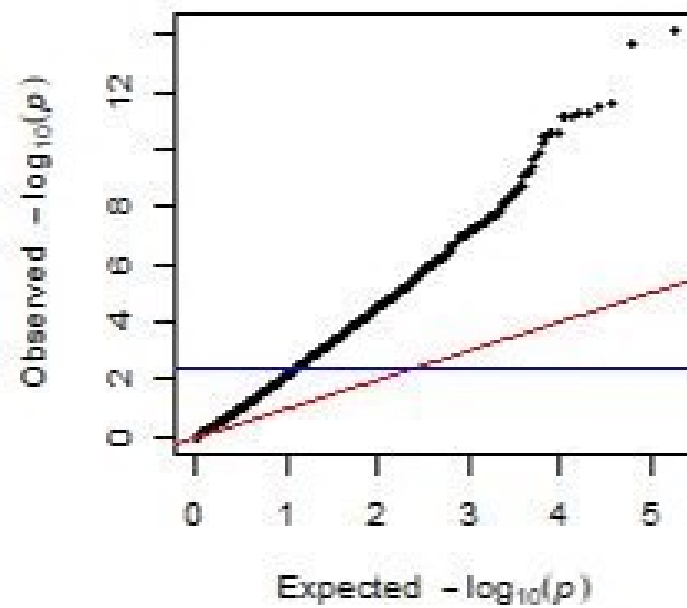

Accounting only for structure

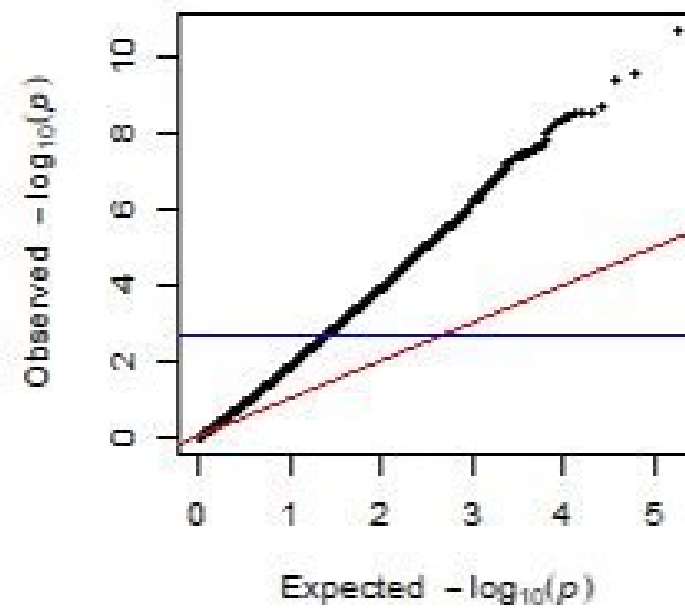

Accounting only for kinship

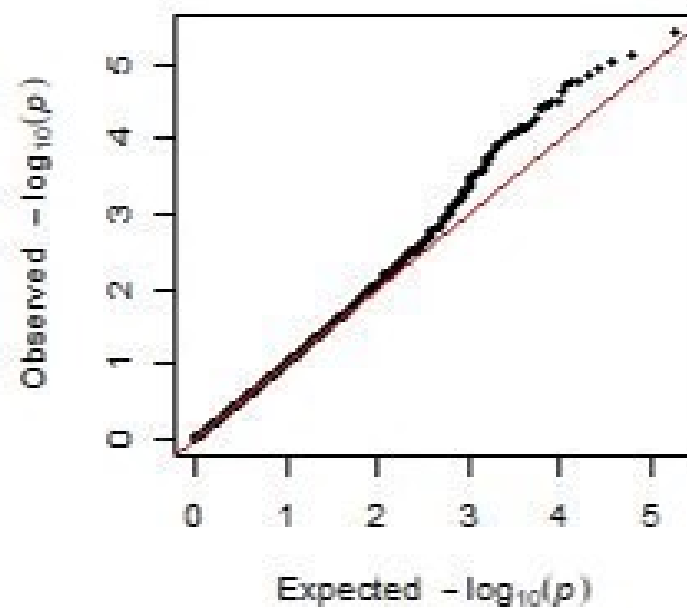

Accounting for kinship and structure

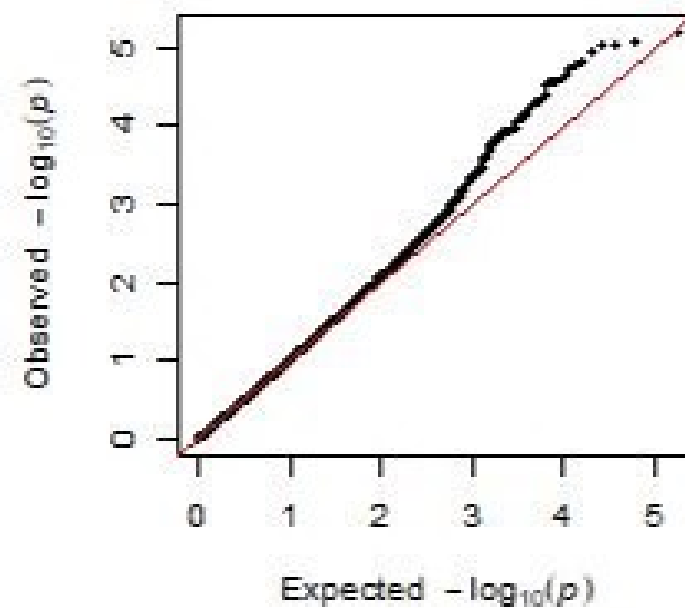

# trait: DRO\_avg

No accounting for kinship or structure

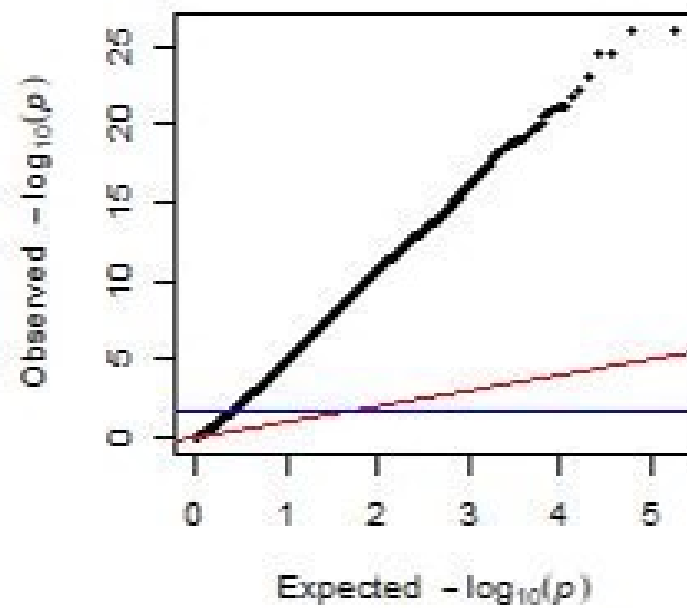

Accounting only for structure

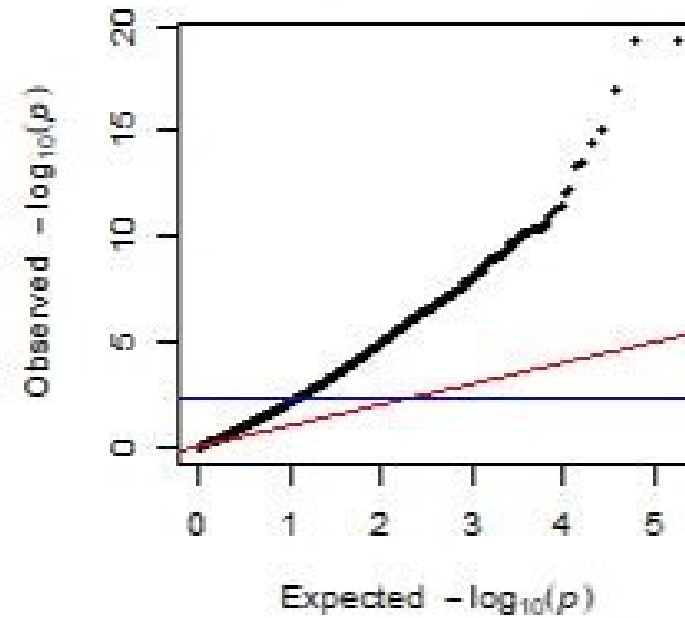

Accounting only for kinship

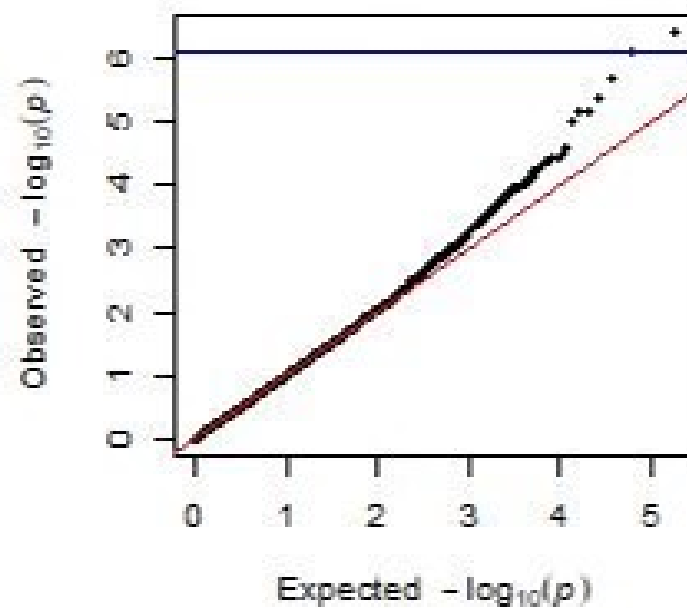

Accounting for kinship and structure

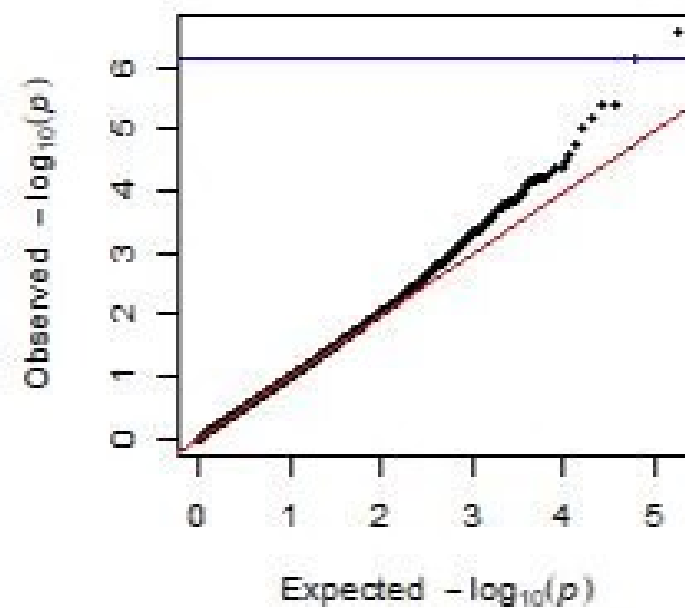

# trait: DRO\_lu16

No accounting for kinship or structure

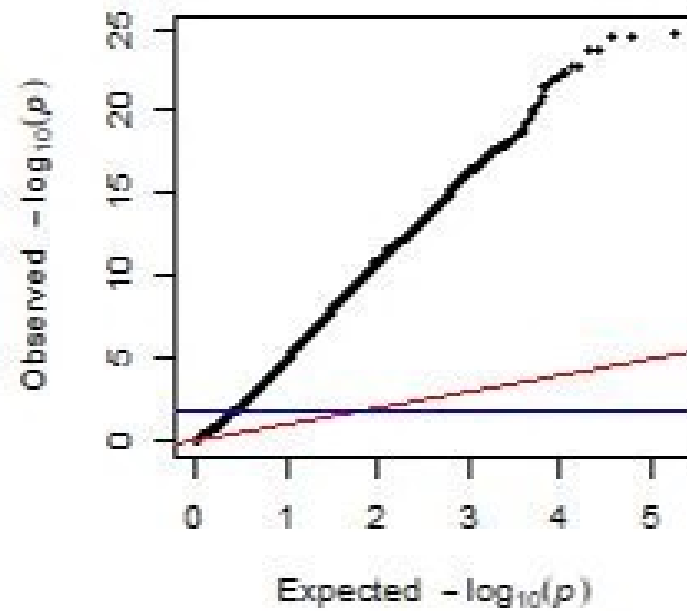

Accounting only for structure

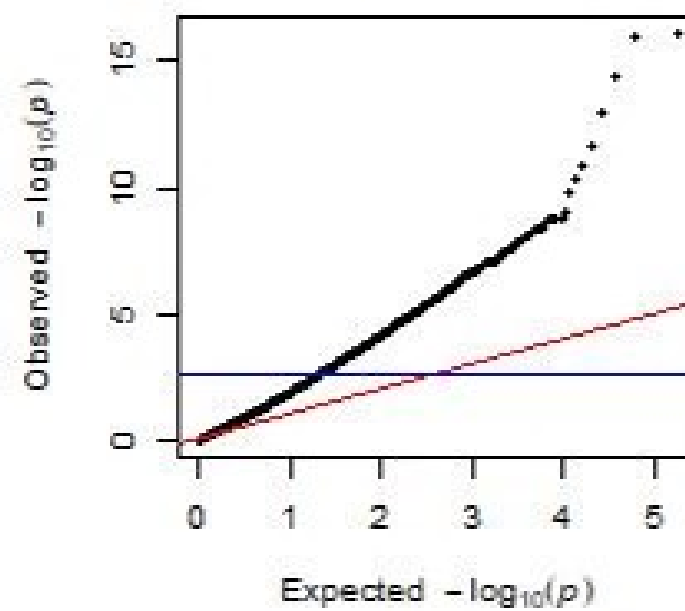

Accounting only for kinship

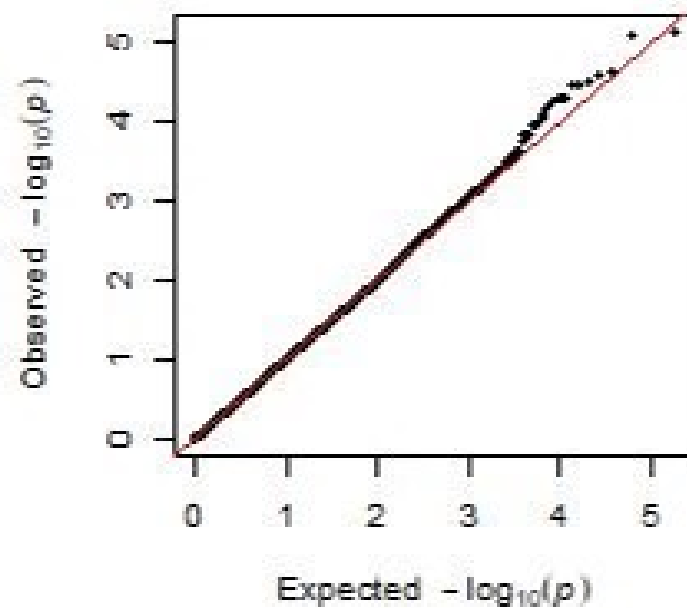

Accounting for kinship and structure

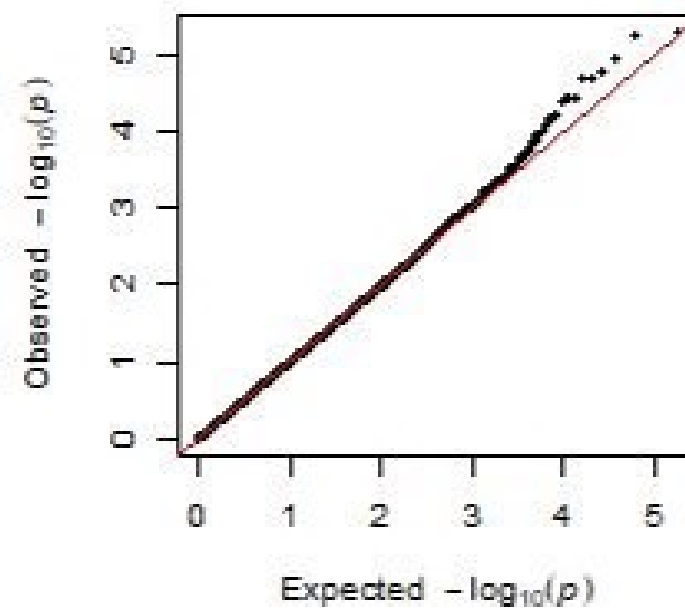

# trait: DRO\_po16

No accounting for kinship or structure

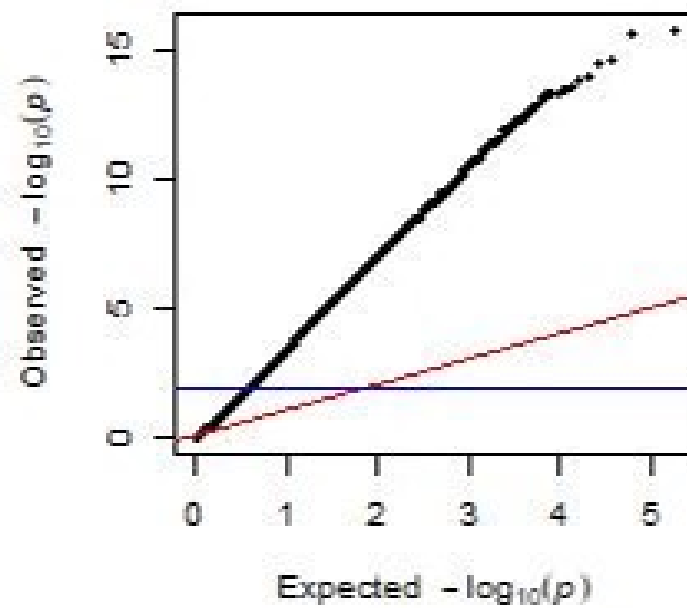

Accounting only for structure

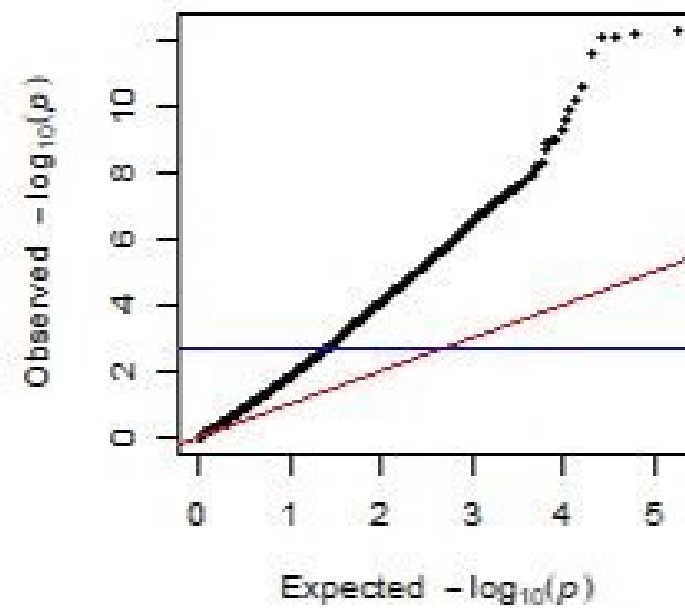

Accounting only for kinship

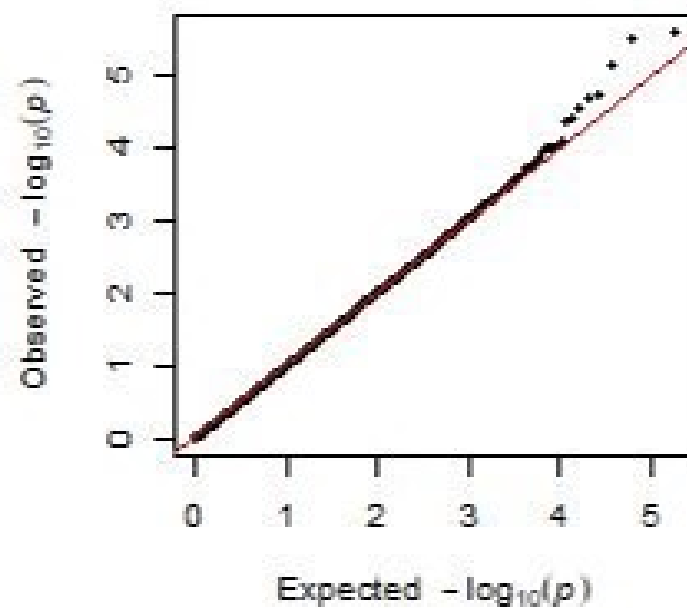

Accounting for kinship and structure

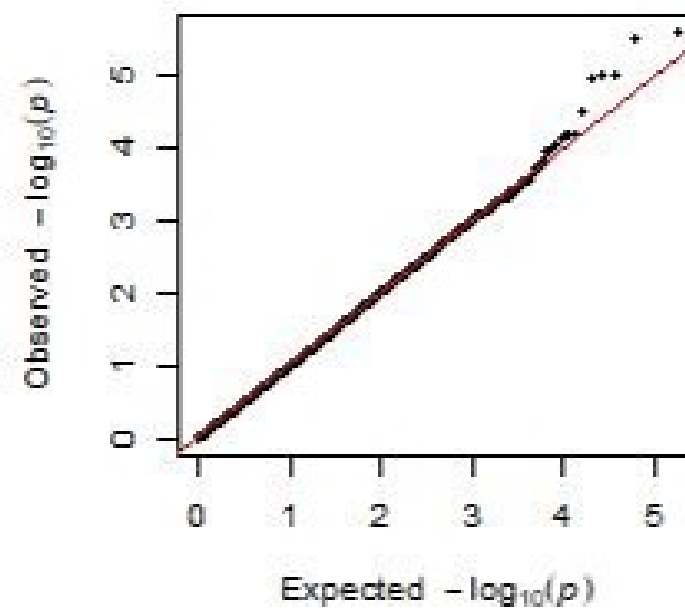



# trait: DST\_avg

No accounting for kinship or structure

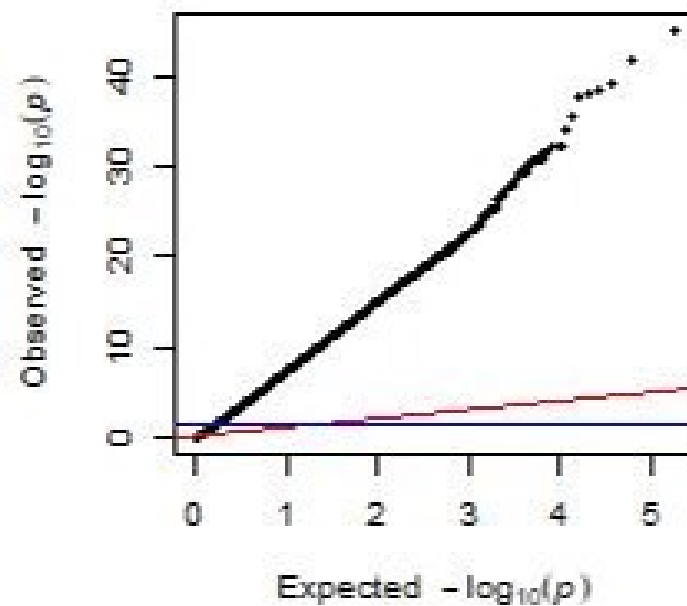

Accounting only for structure

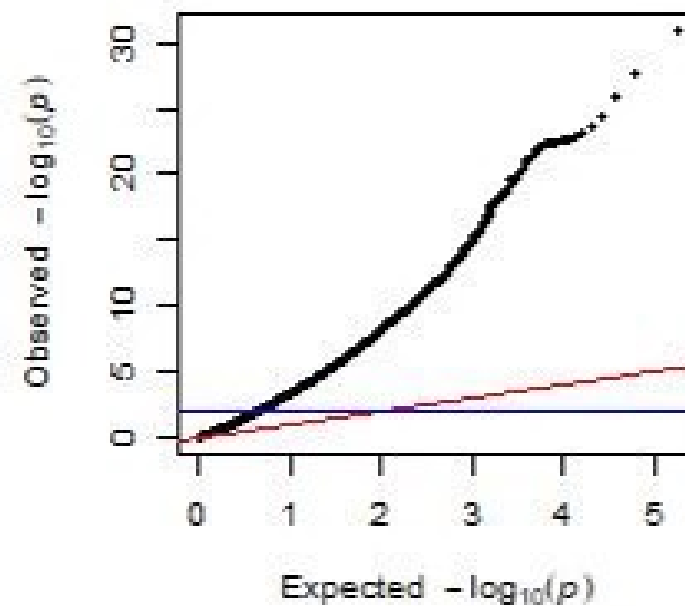

Accounting only for kinship

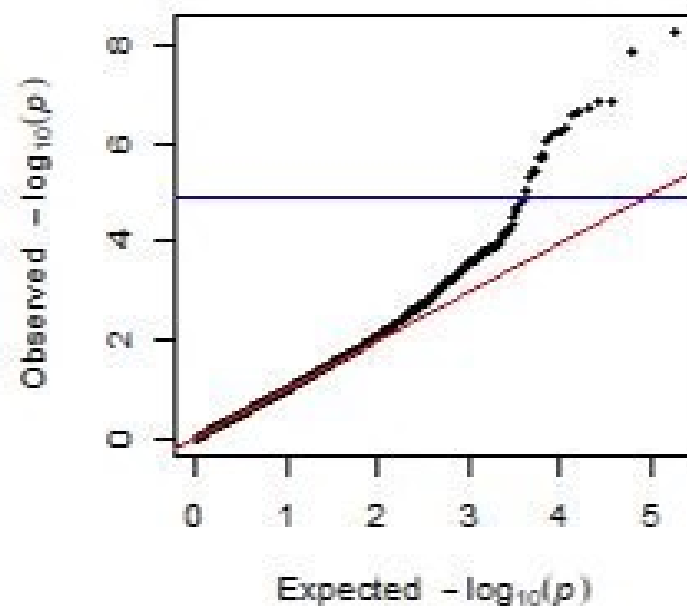

Accounting for kinship and structure

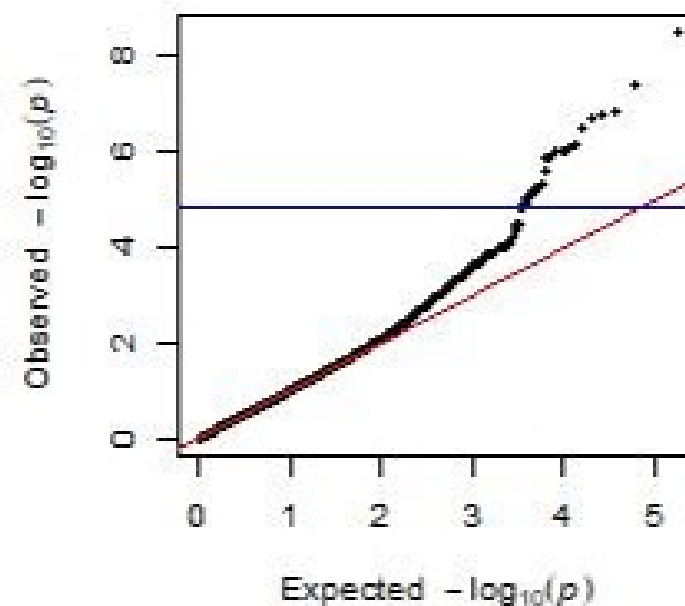

# trait: DST\_lu17

No accounting for kinship or structure

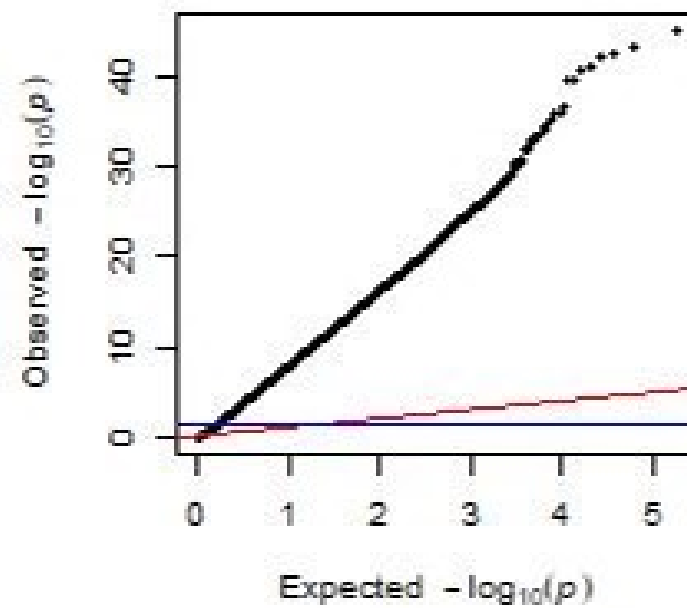

Accounting only for structure

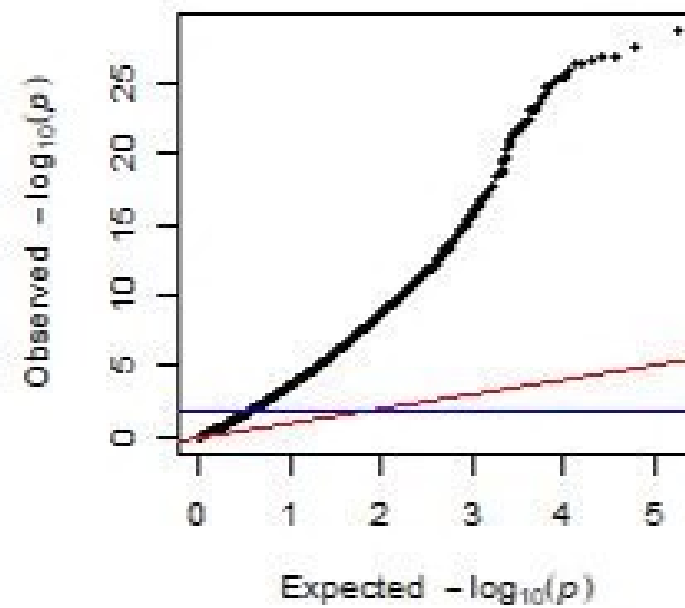

Accounting only for kinship

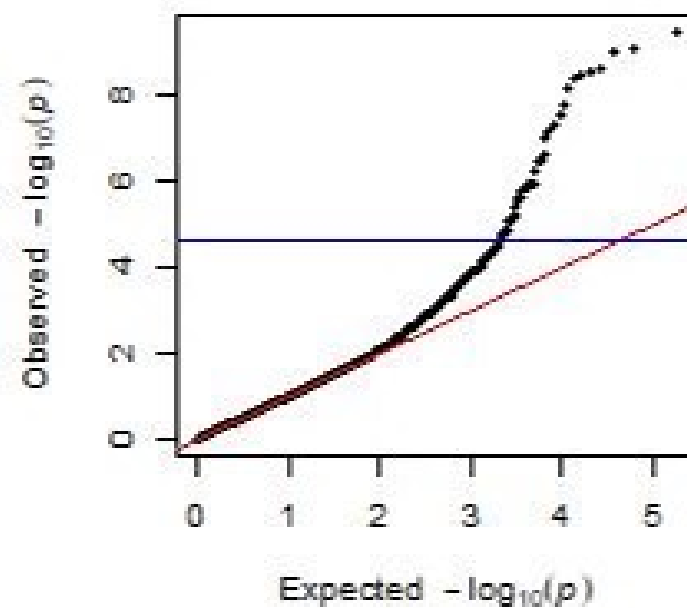

Accounting for kinship and structure

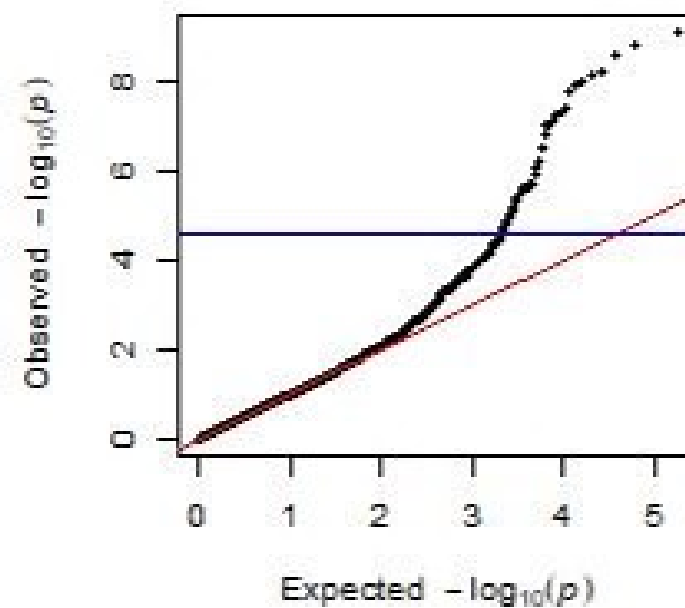

# trait: DST\_po17

No accounting for kinship or structure

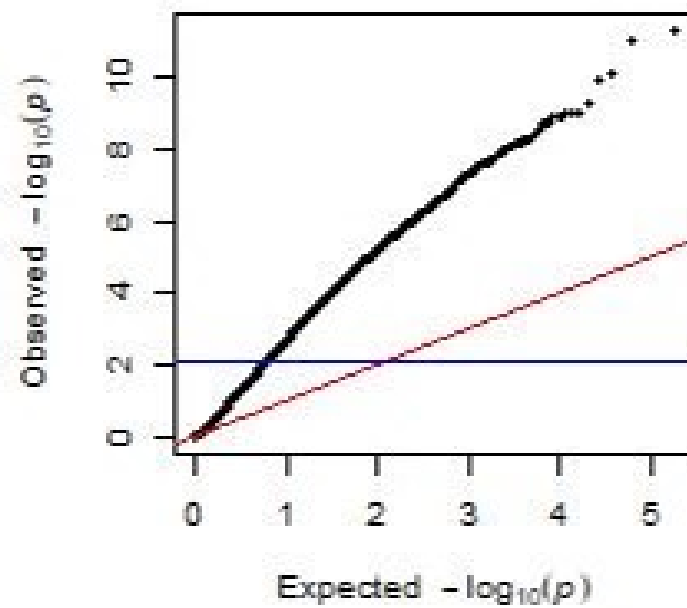

Accounting only for structure

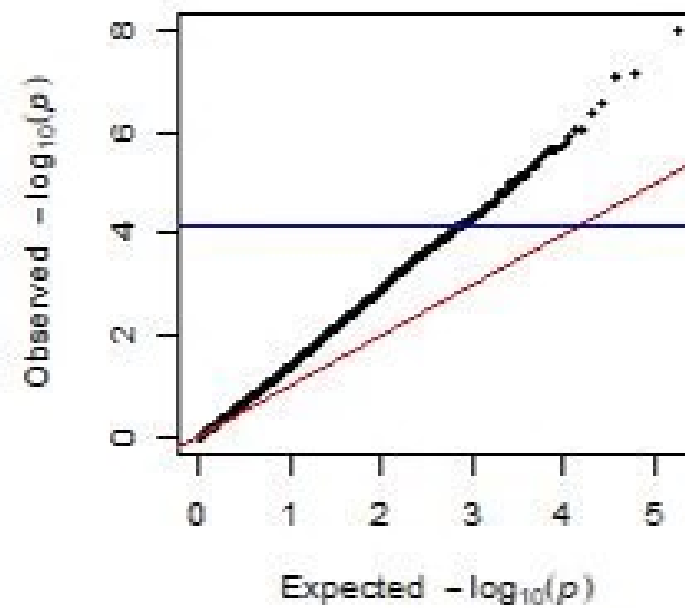

Accounting only for kinship

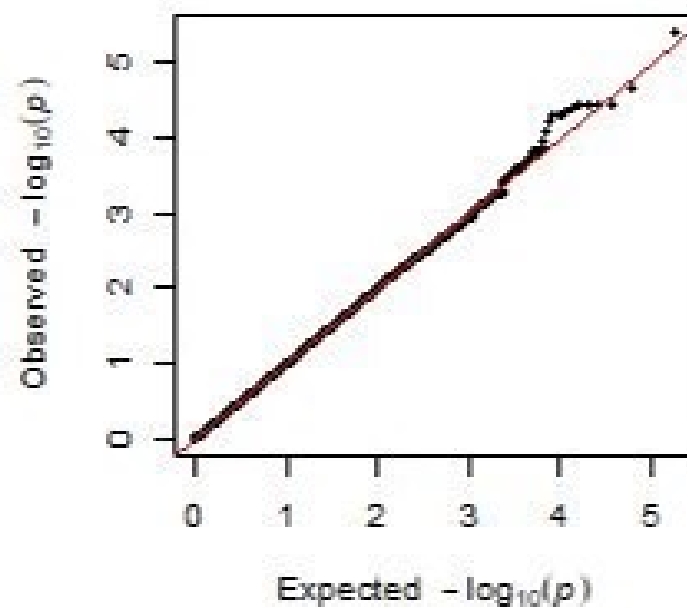

Accounting for kinship and structure

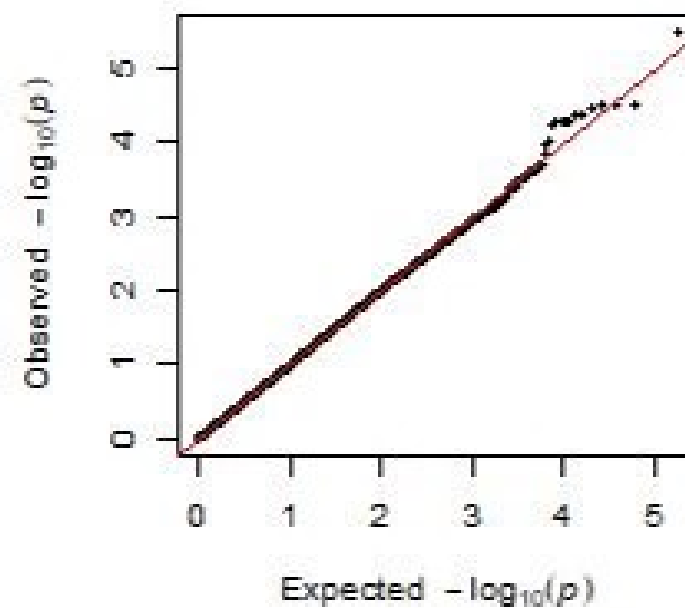

# trait: DVG\_04\_lu17

No accounting for kinship or structure



Accounting only for structure



Accounting only for kinship



Accounting for kinship and structure



# trait: GRH\_avg

No accounting for kinship or structure

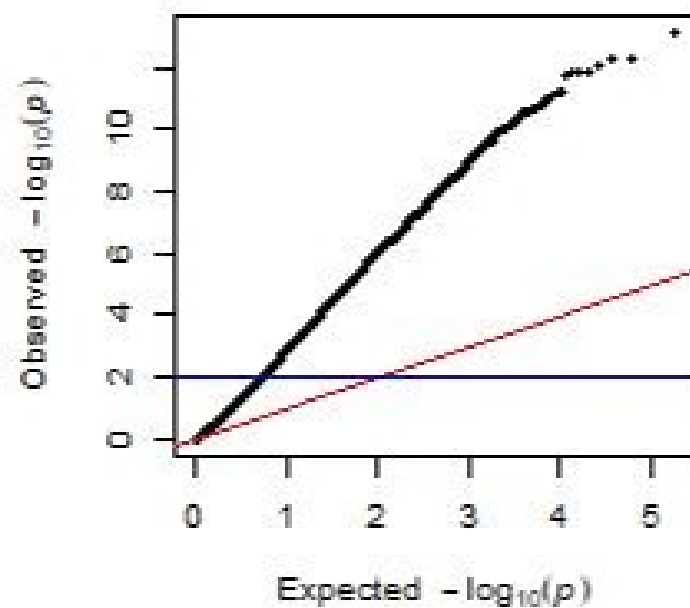

Accounting only for structure

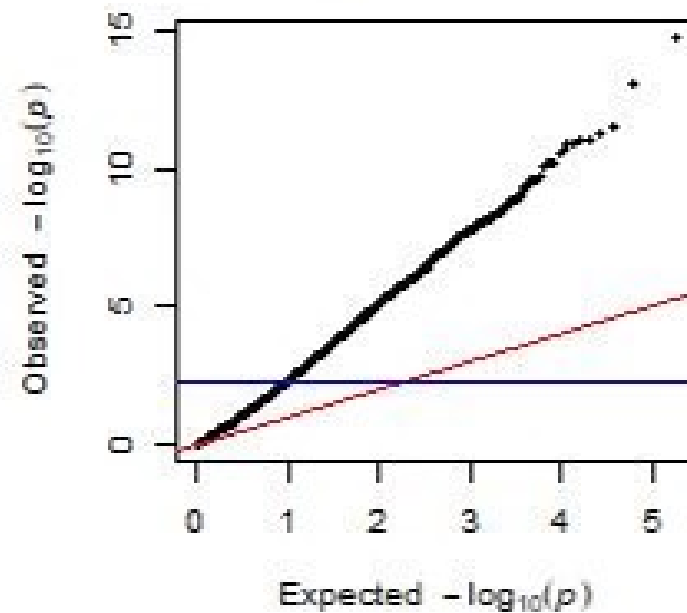

Accounting only for kinship

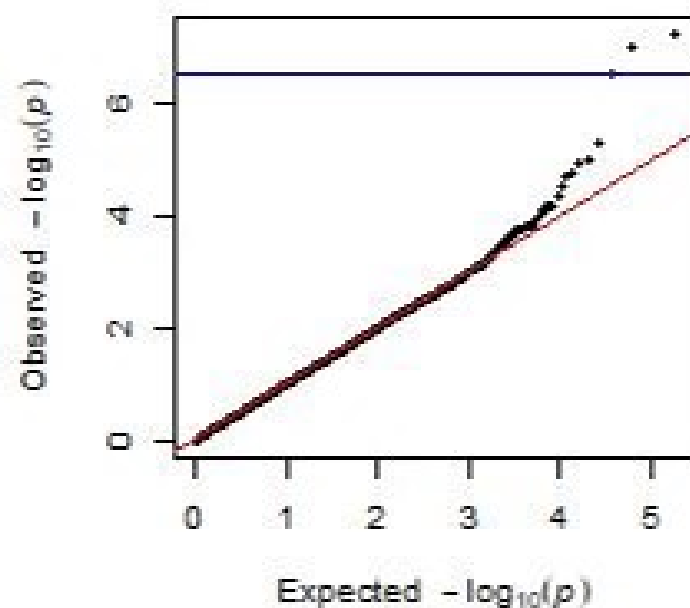

Accounting for kinship and structure

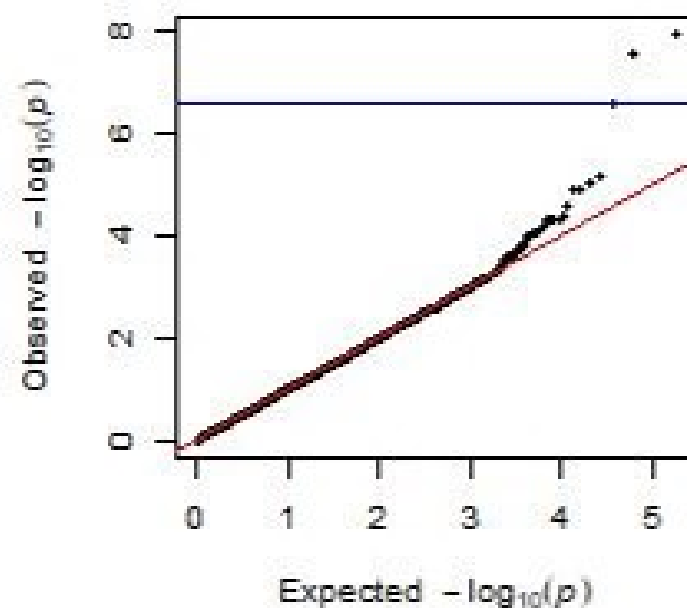

# trait: HEA\_avg

No accounting for kinship or structure

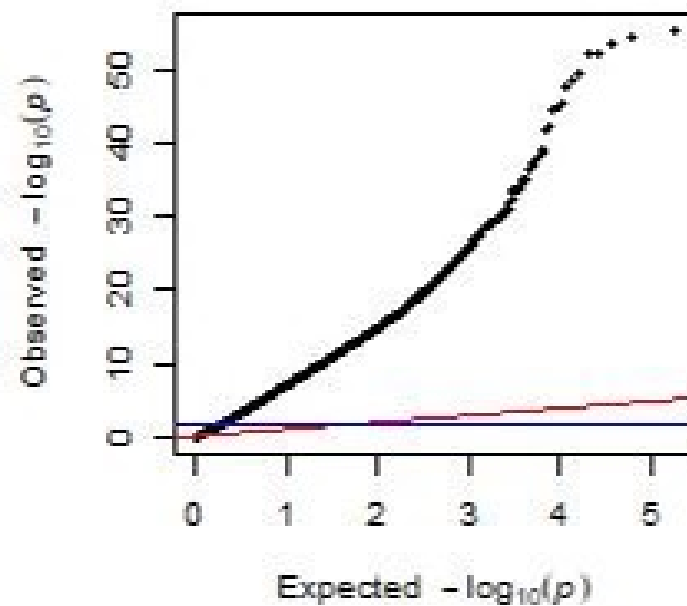

Accounting only for structure

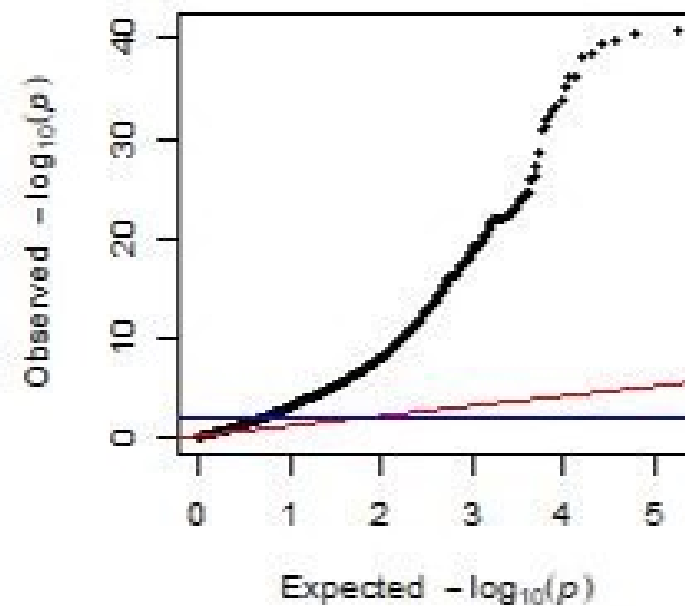

Accounting only for kinship

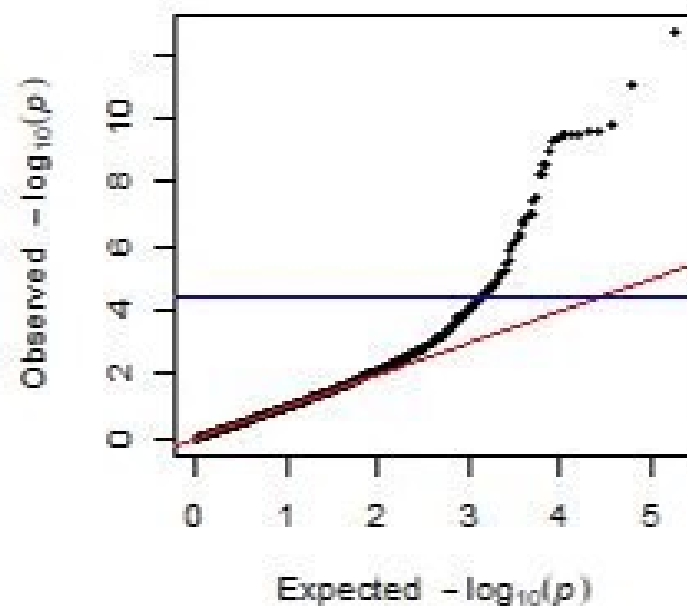

Accounting for kinship and structure

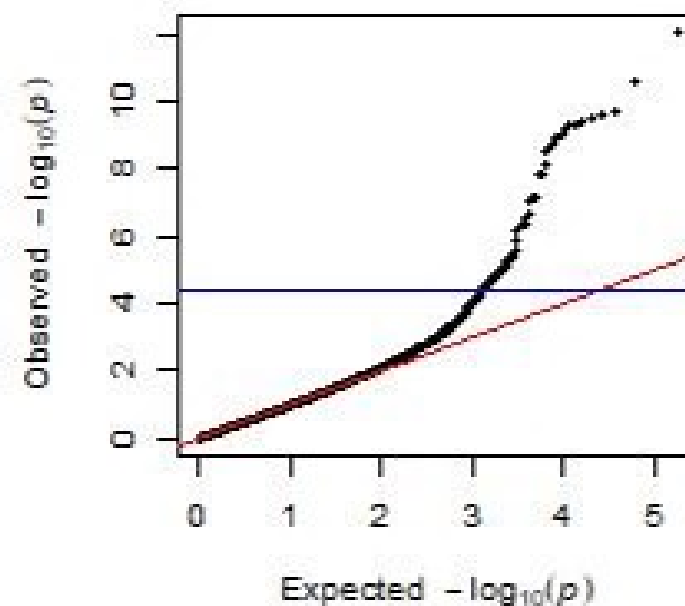

# trait: HEA\_lu16

No accounting for kinship or structure

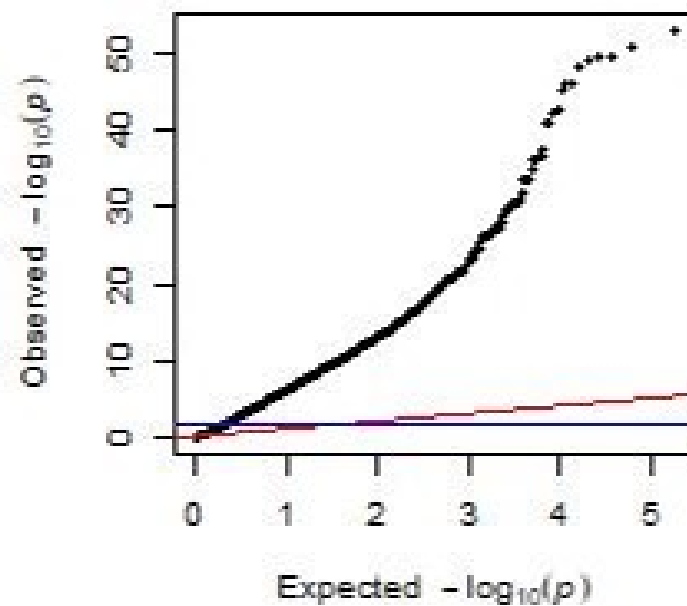

Accounting only for structure

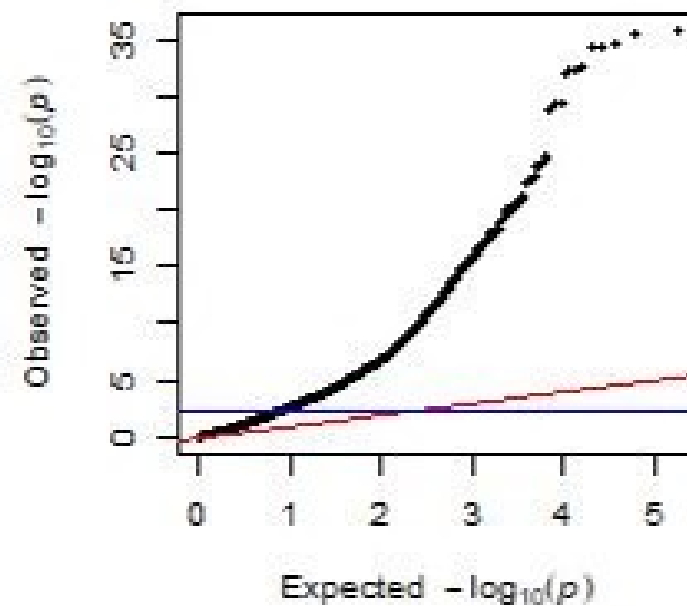

Accounting only for kinship

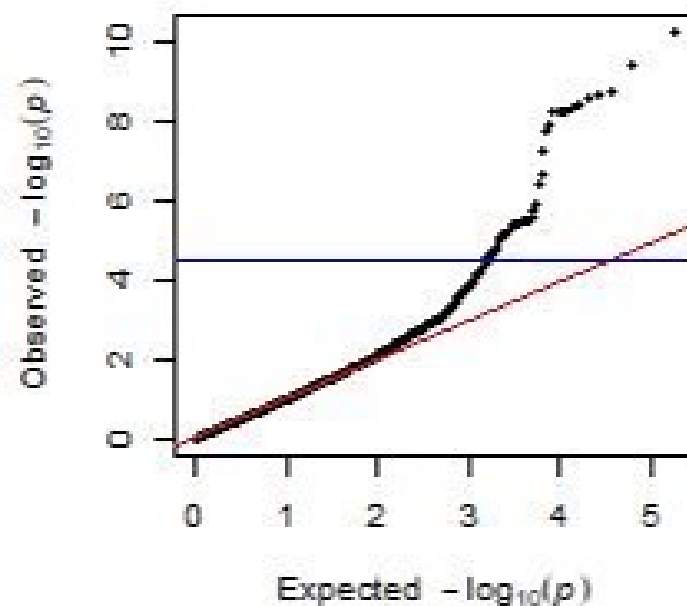

Accounting for kinship and structure

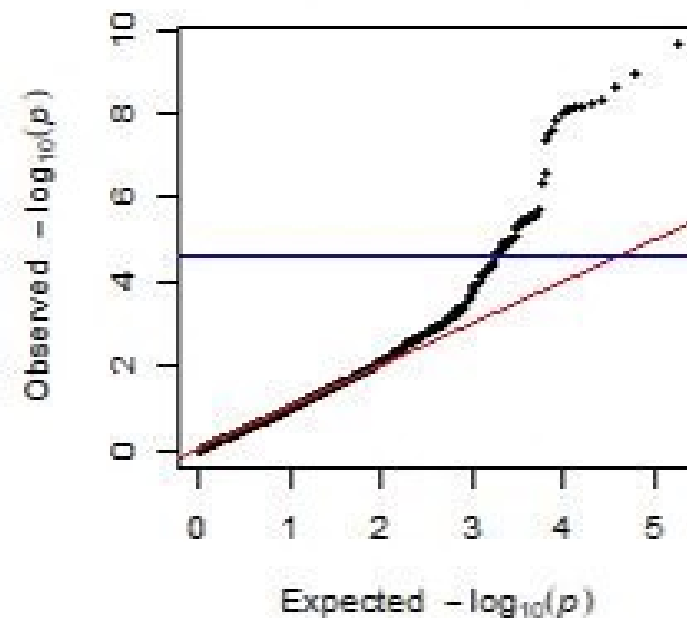

# trait: HEA\_lu17

No accounting for kinship or structure

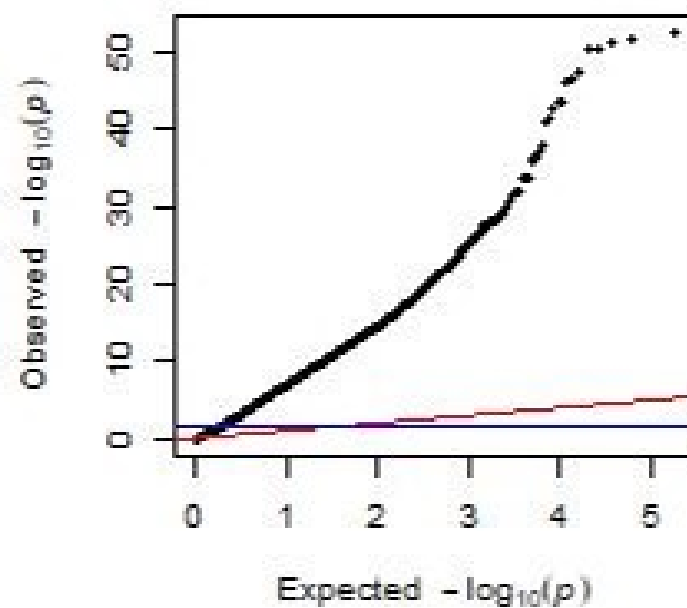

Accounting only for structure

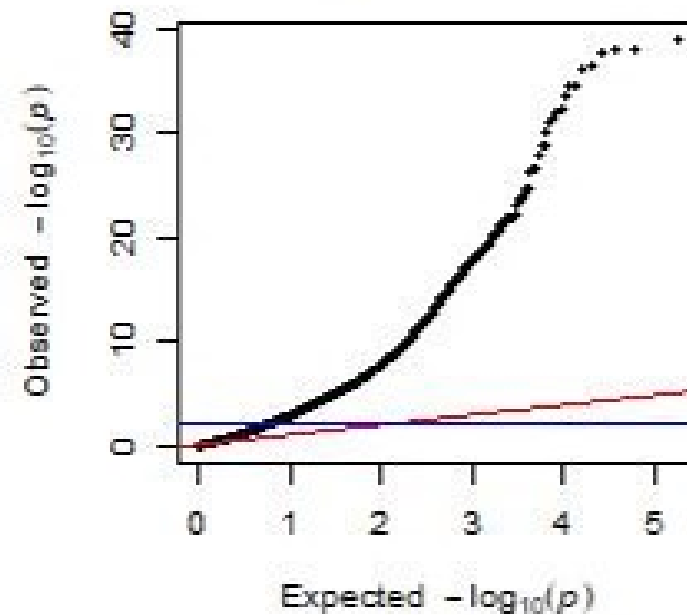

Accounting only for kinship

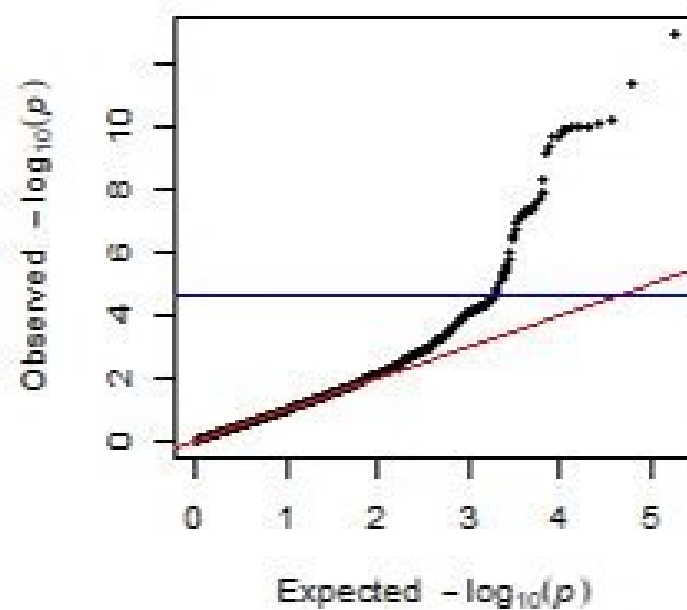

Accounting for kinship and structure

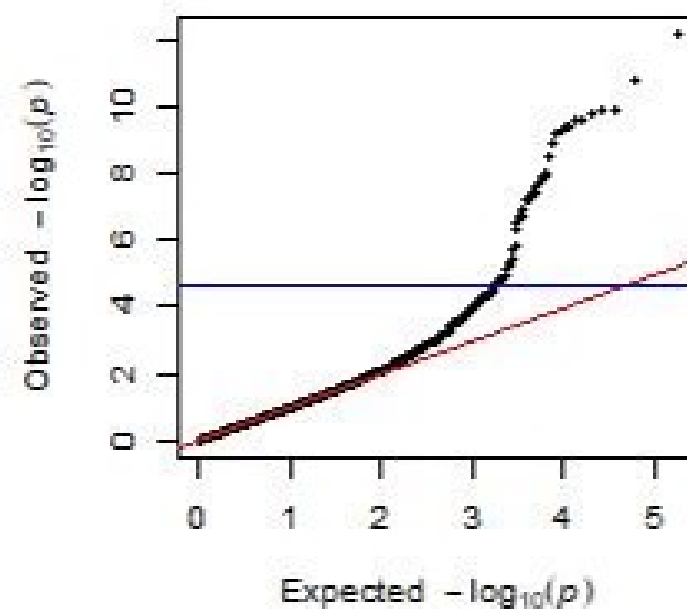



# trait: HEA\_po16

No accounting for kinship or structure

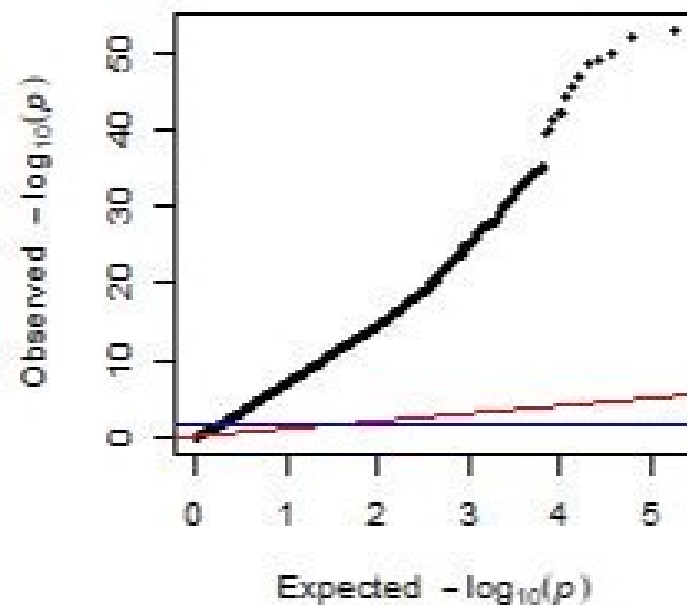

Accounting only for structure

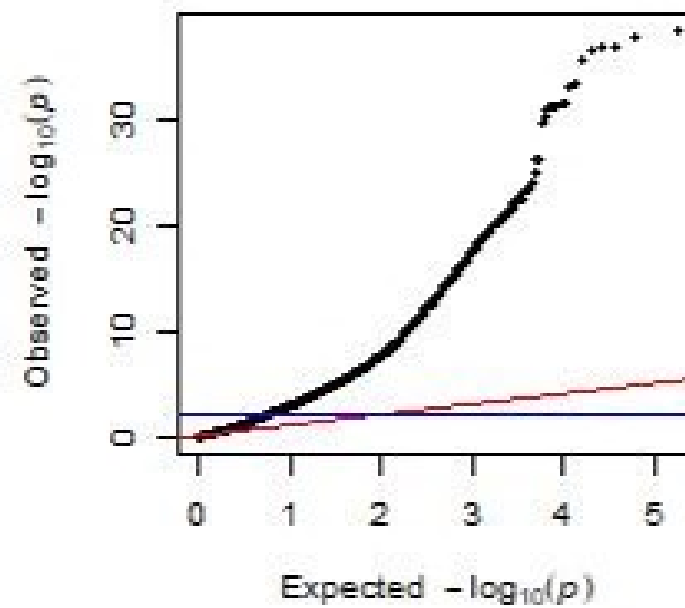

Accounting only for kinship

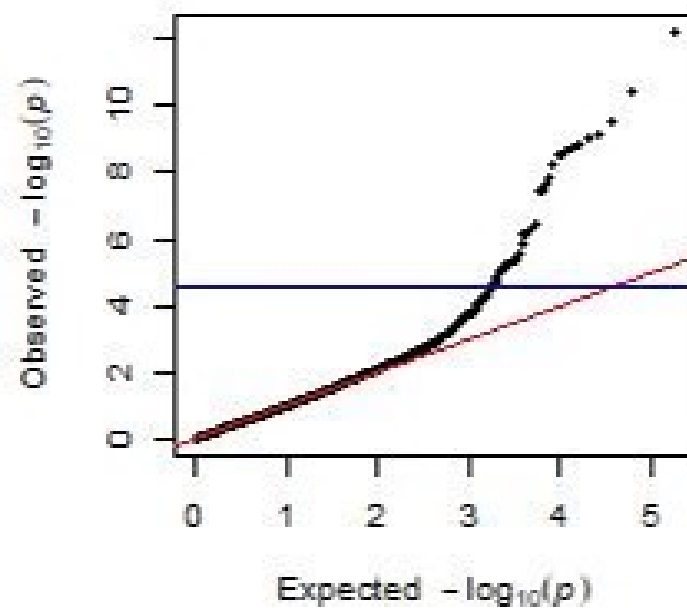

Accounting for kinship and structure

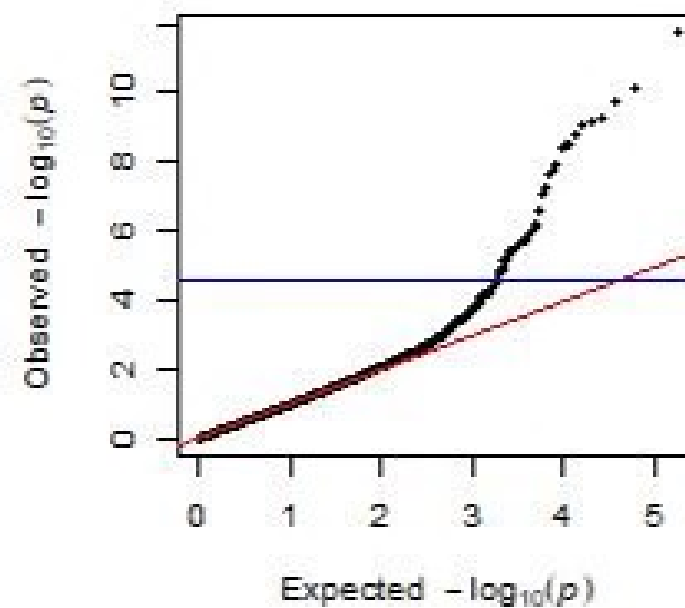

# trait: HEA\_po17

No accounting for kinship or structure

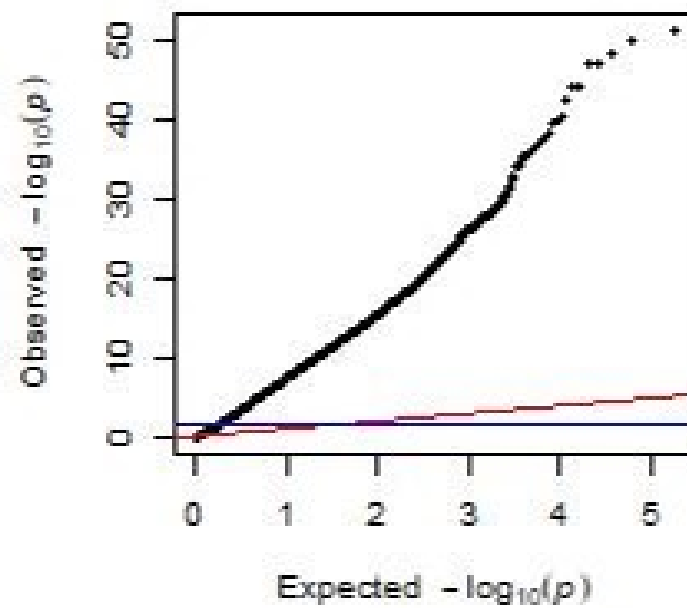

Accounting only for structure

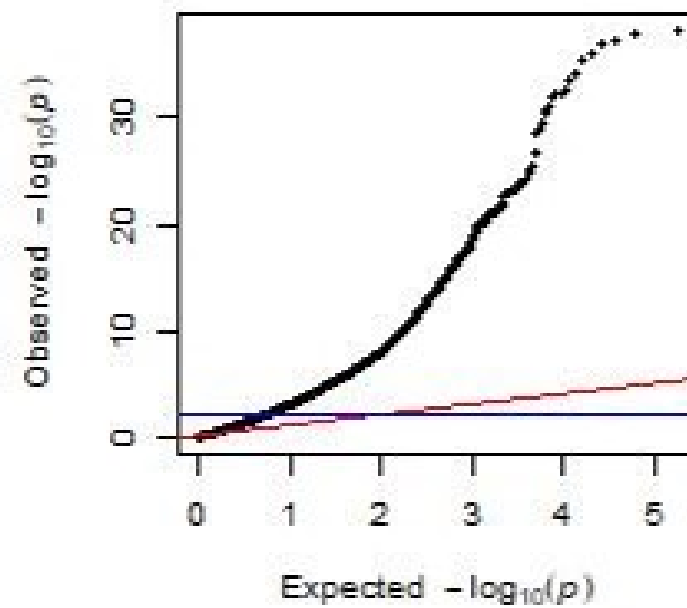

Accounting only for kinship

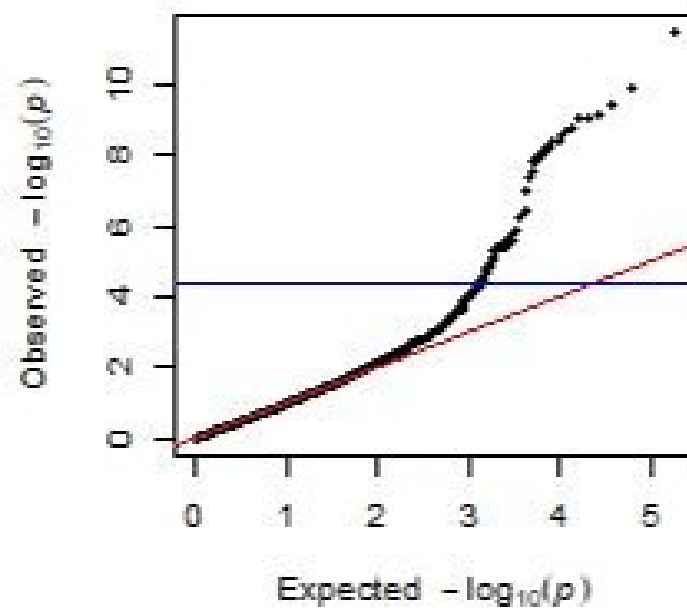

Accounting for kinship and structure

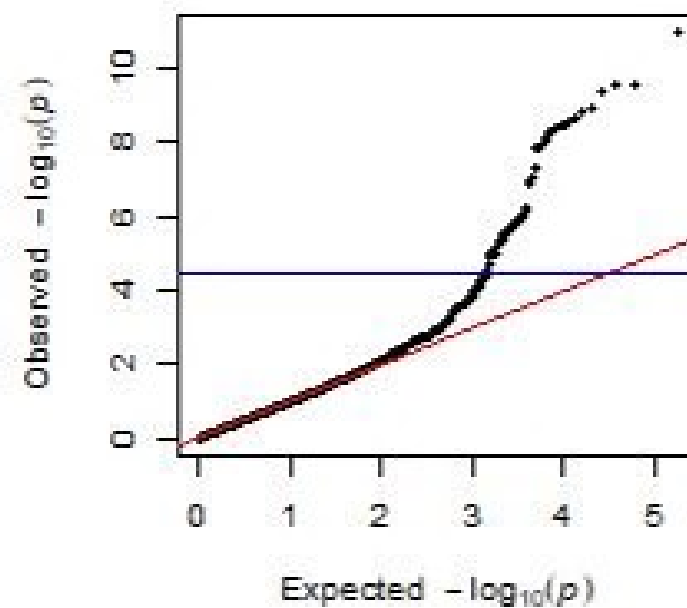

# trait: HFY\_avg

No accounting for kinship or structure

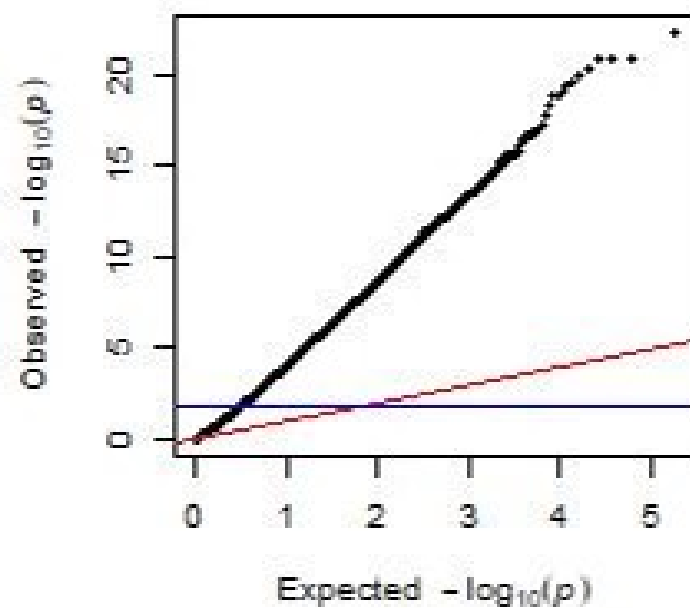

Accounting only for structure

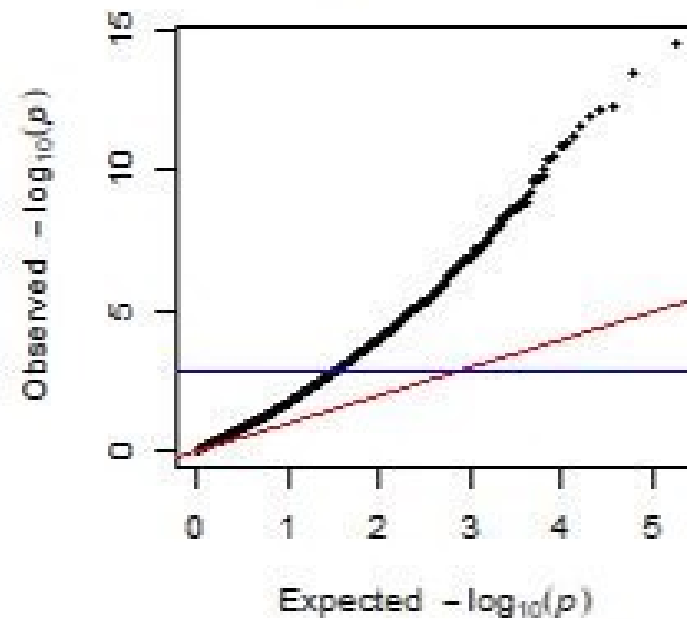

Accounting only for kinship

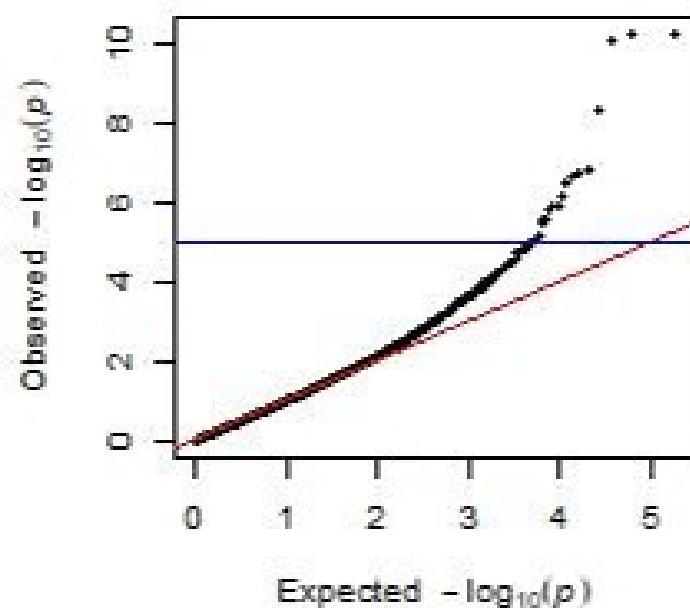

Accounting for kinship and structure

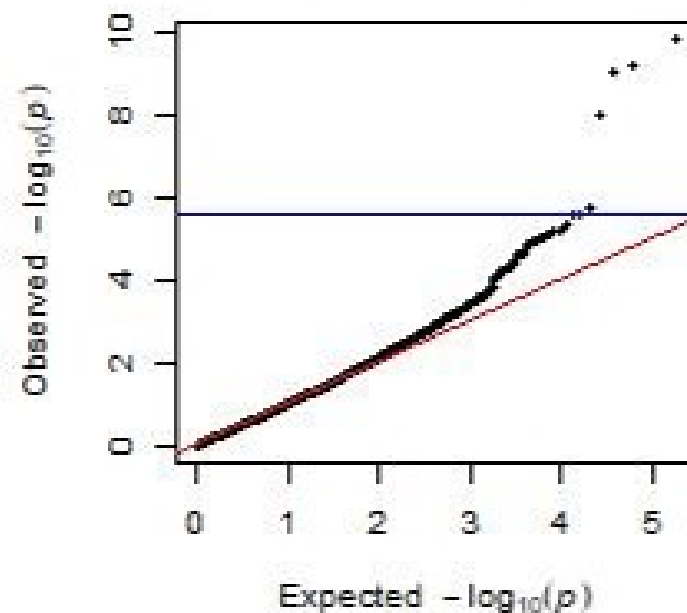

# trait: HFY\_lu15

No accounting for kinship or structure

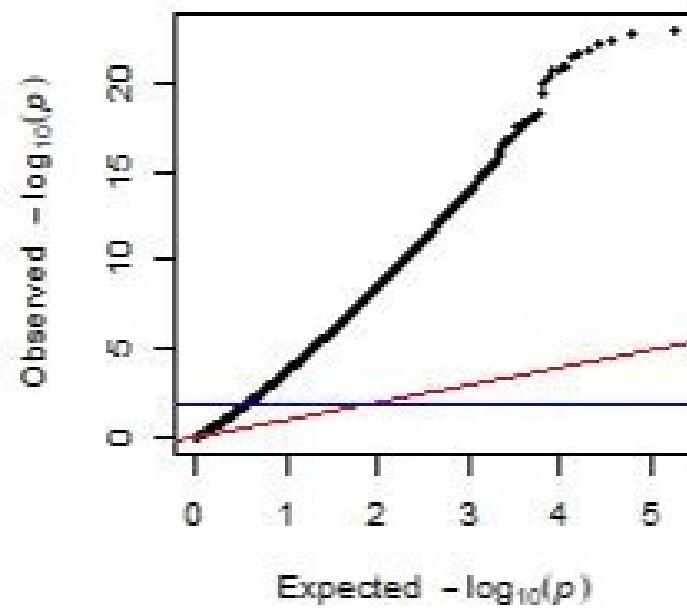

Accounting only for structure

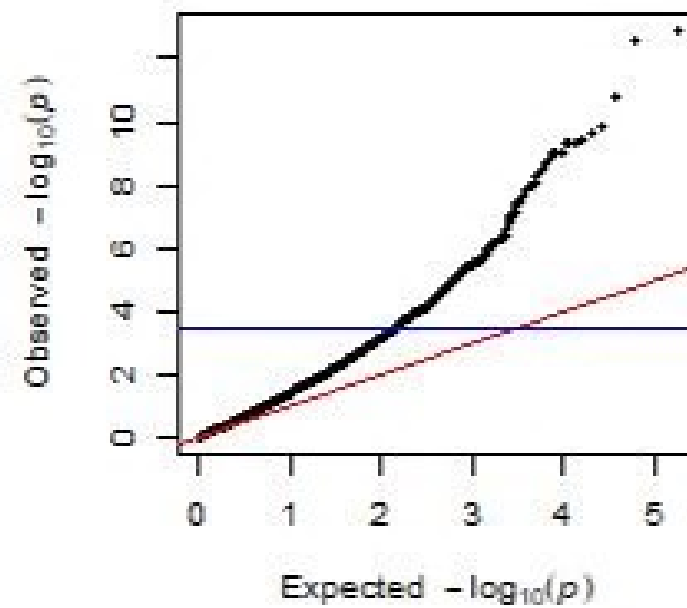

Accounting only for kinship

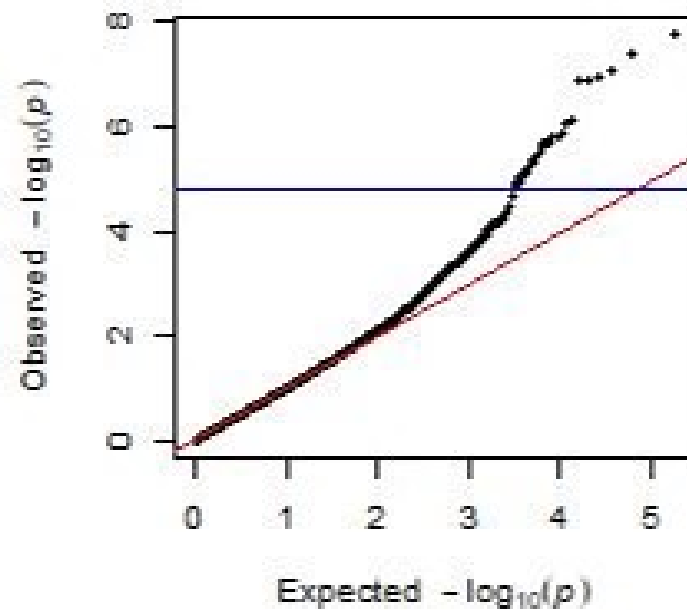

Accounting for kinship and structure

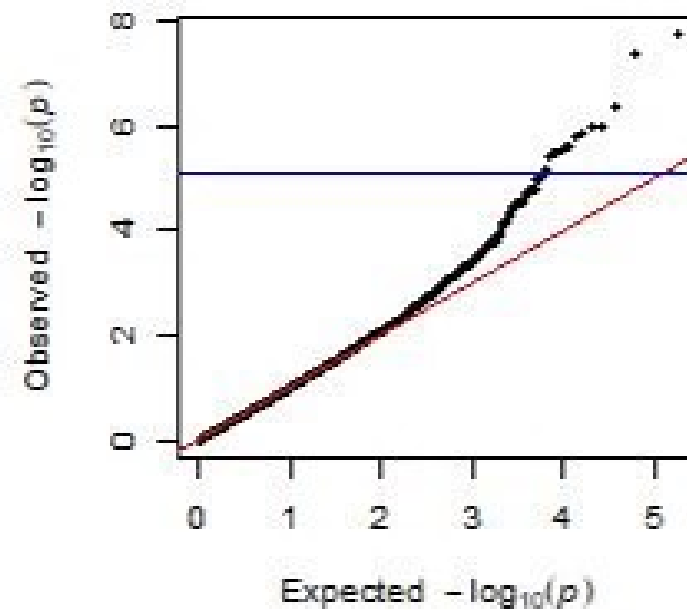

# trait: HFY\_po15

No accounting for kinship or structure

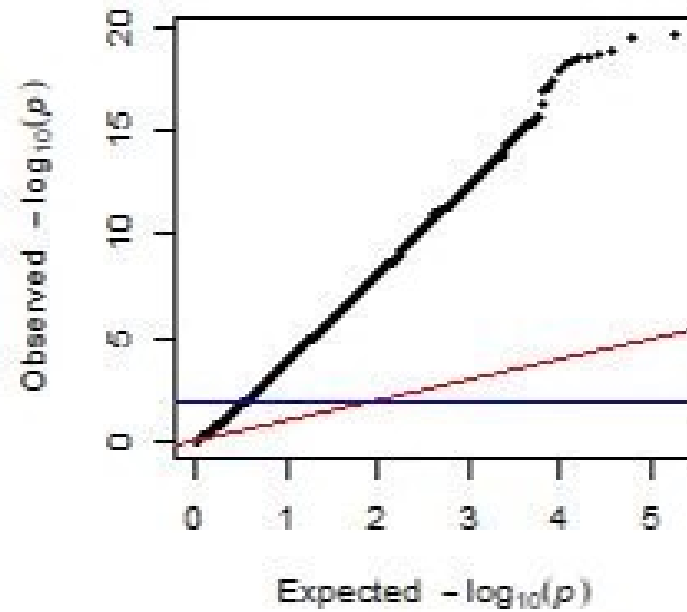

Accounting only for structure

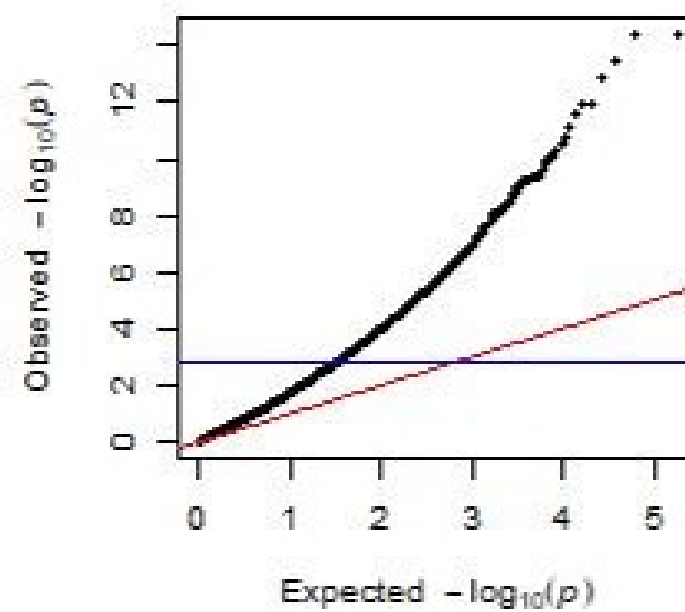

Accounting only for kinship

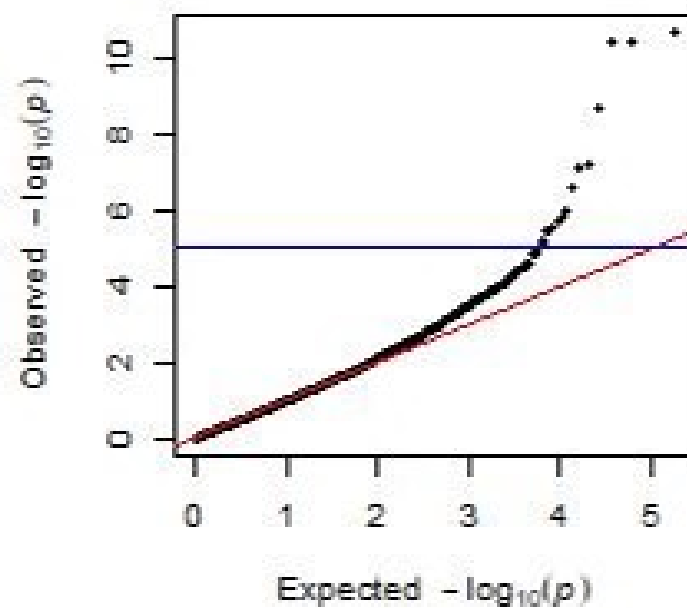

Accounting for kinship and structure

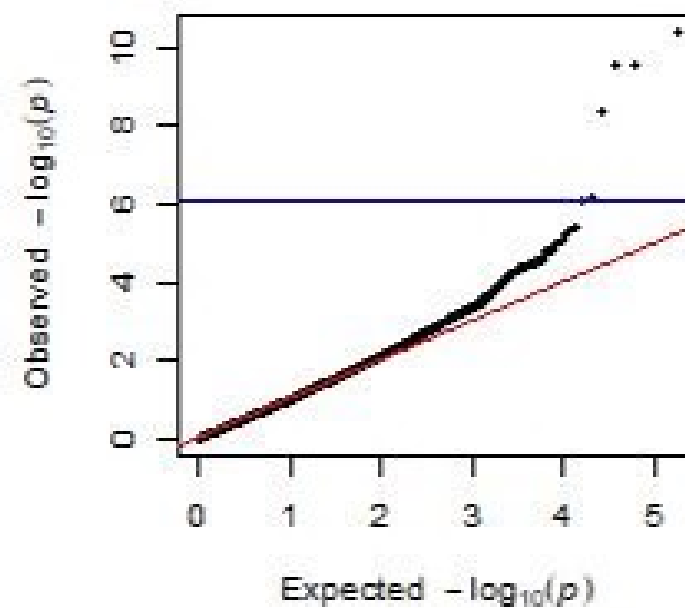

# trait: HST\_lu17

No accounting for kinship or structure

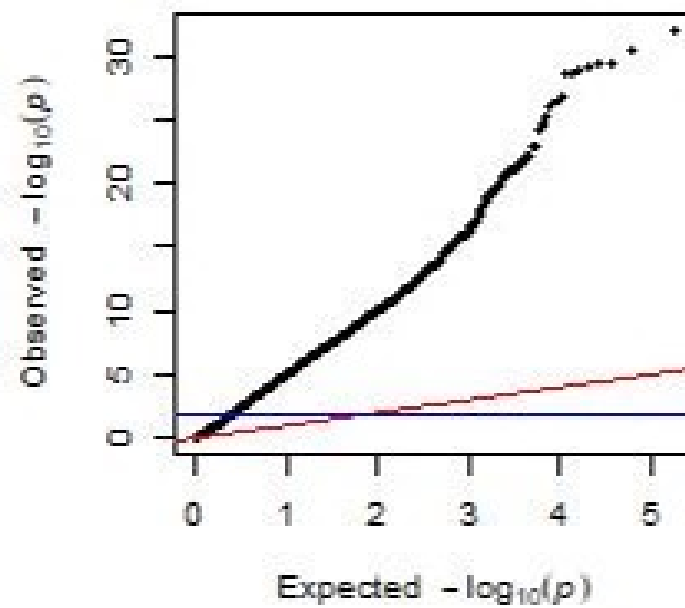

Accounting only for structure

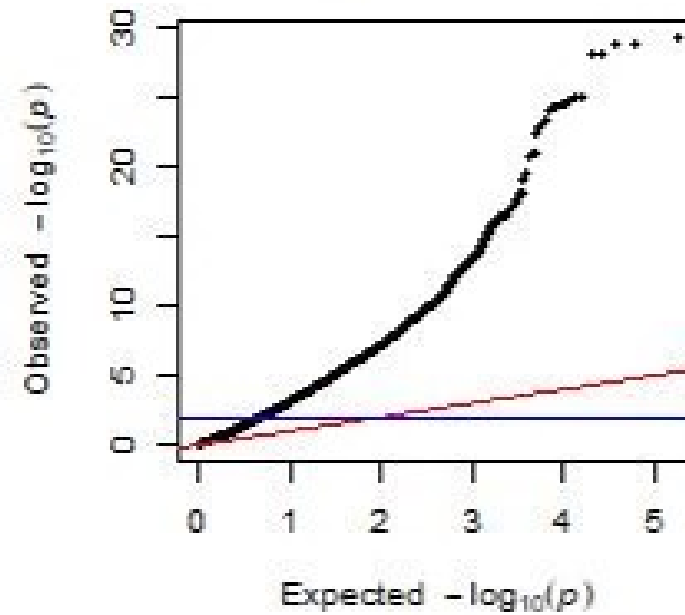

Accounting only for kinship

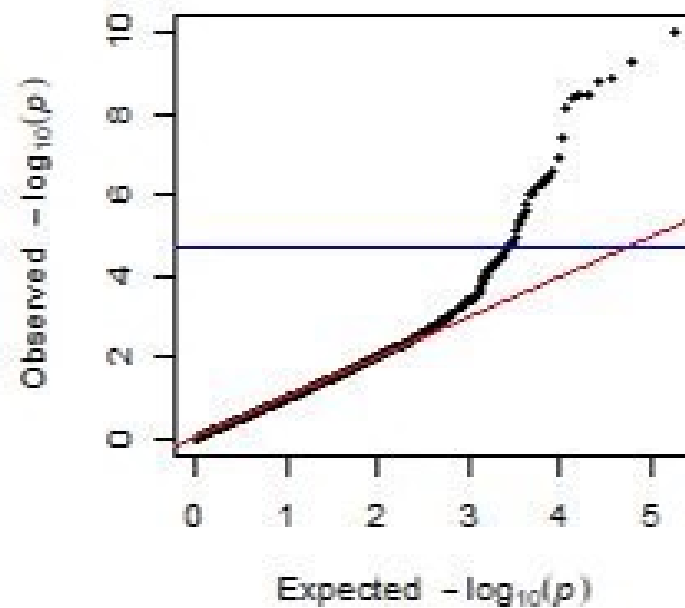

Accounting for kinship and structure

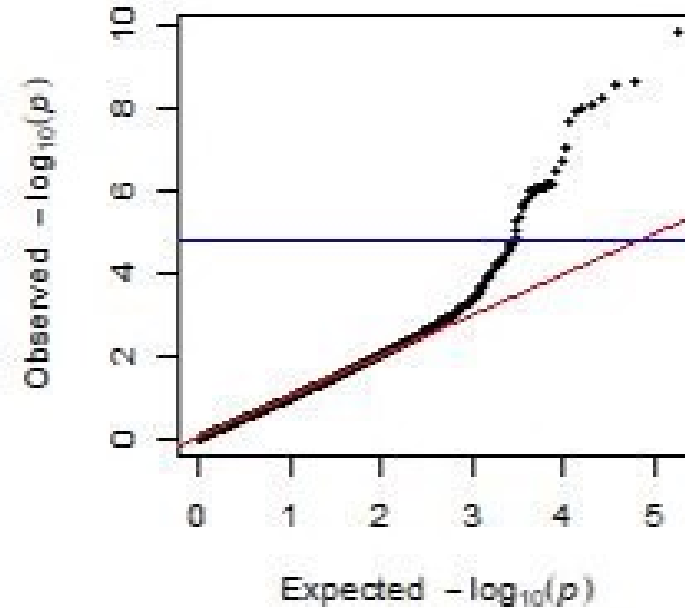

# trait: LMW\_avg

No accounting for kinship or structure

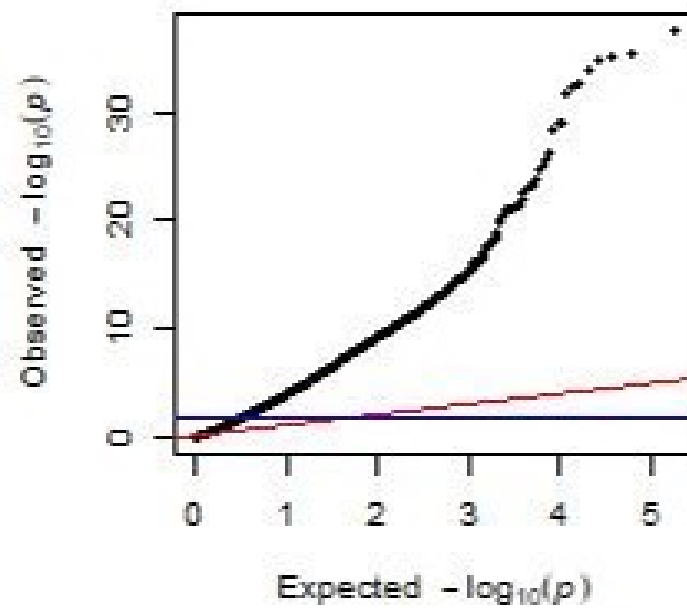

Accounting only for structure

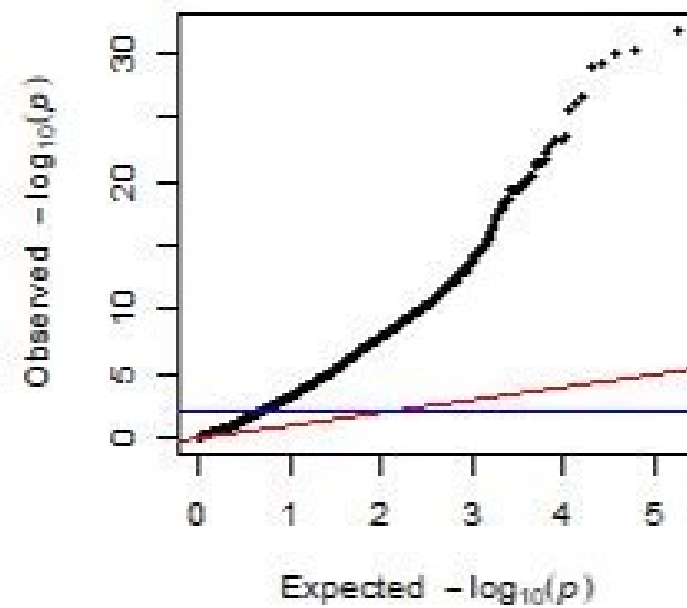

Accounting only for kinship

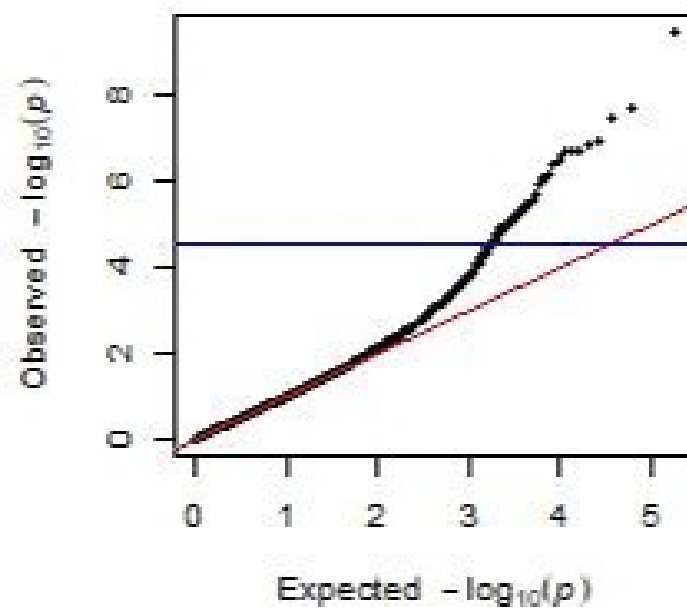

Accounting for kinship and structure

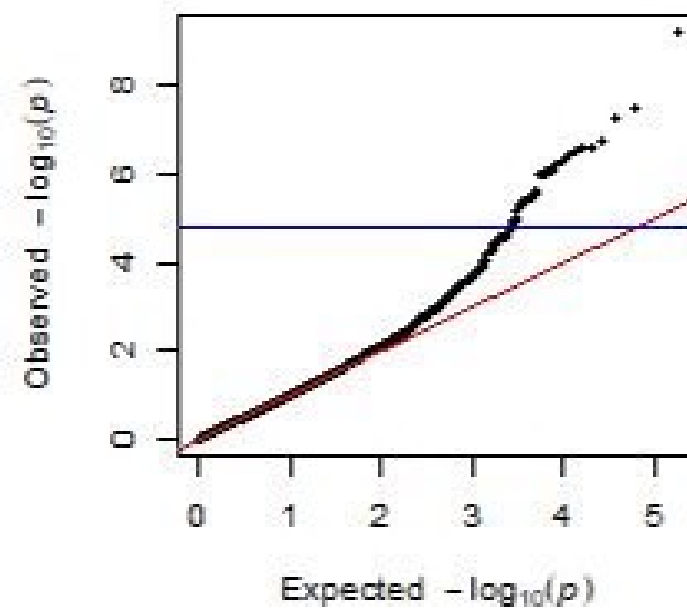

# trait: LMW\_lu17

No accounting for kinship or structure

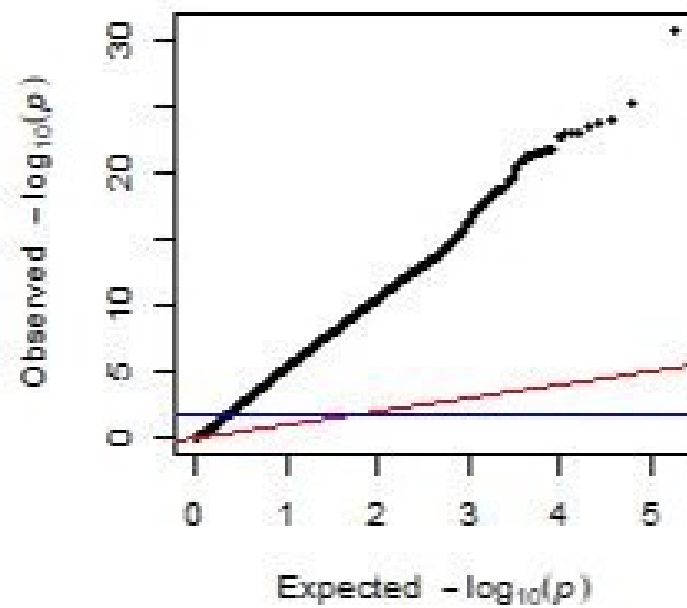

Accounting only for structure

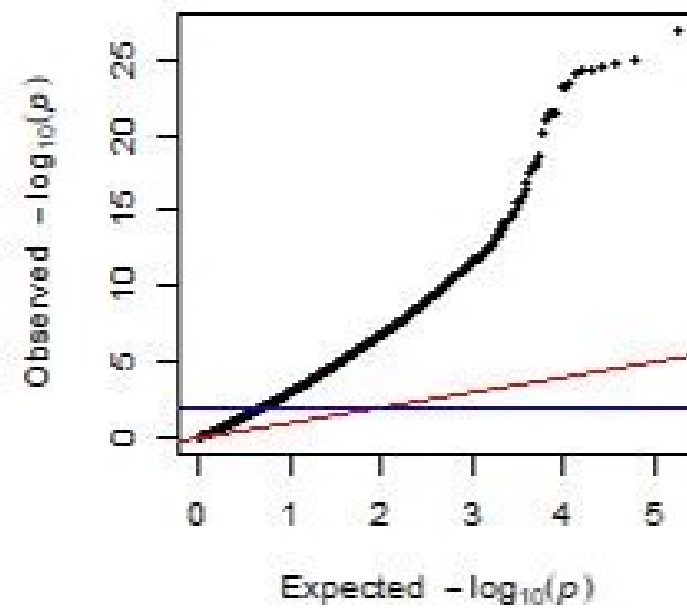

Accounting only for kinship

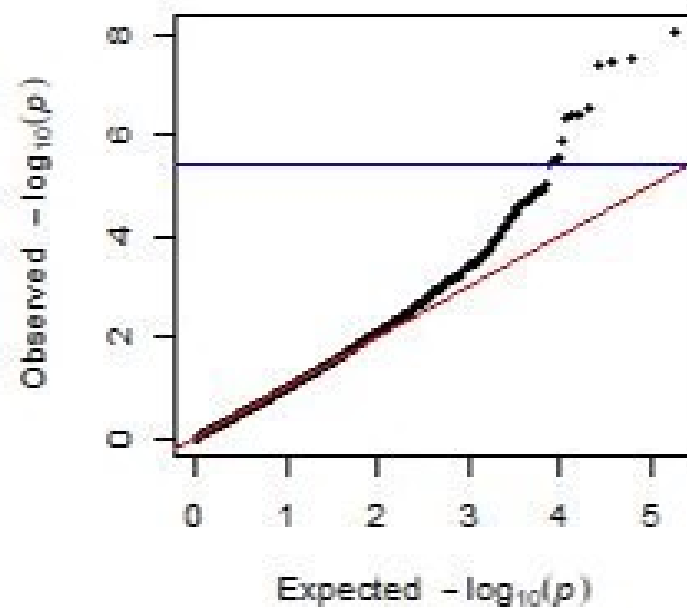

Accounting for kinship and structure

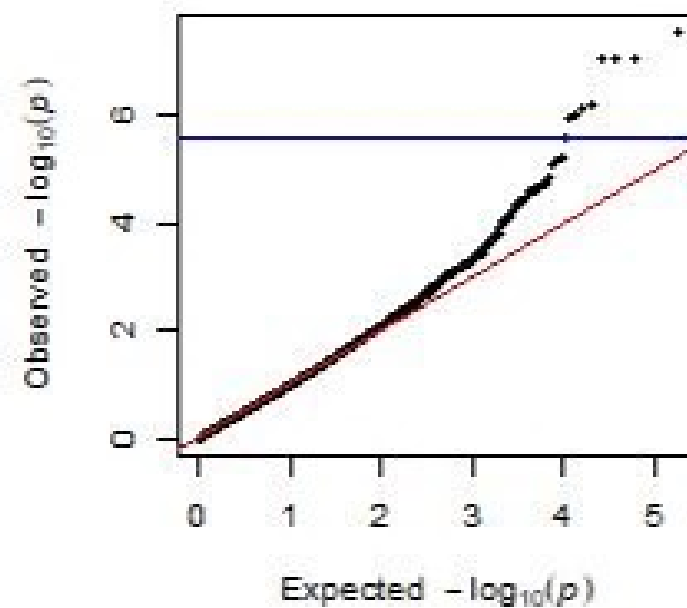



# trait: LMW\_me16

No accounting for kinship or structure

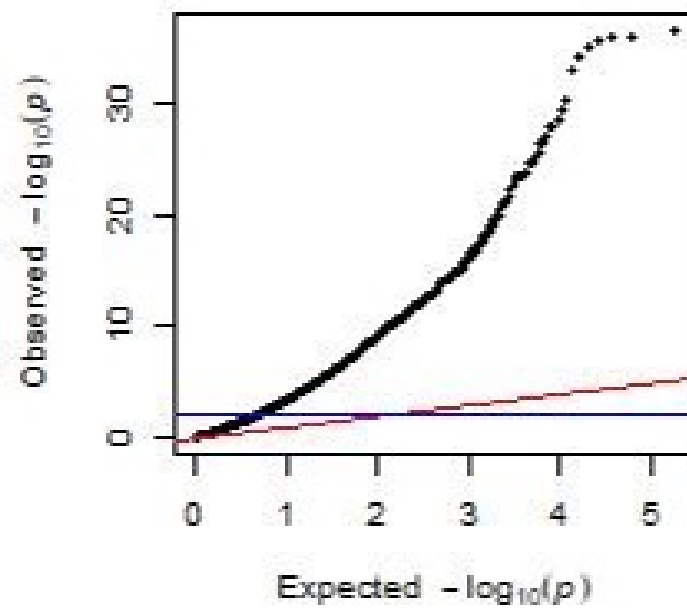

Accounting only for structure

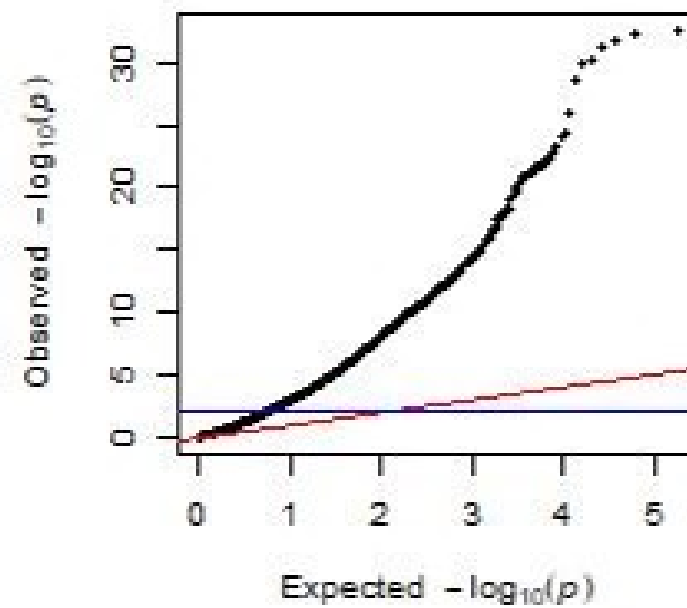

Accounting only for kinship

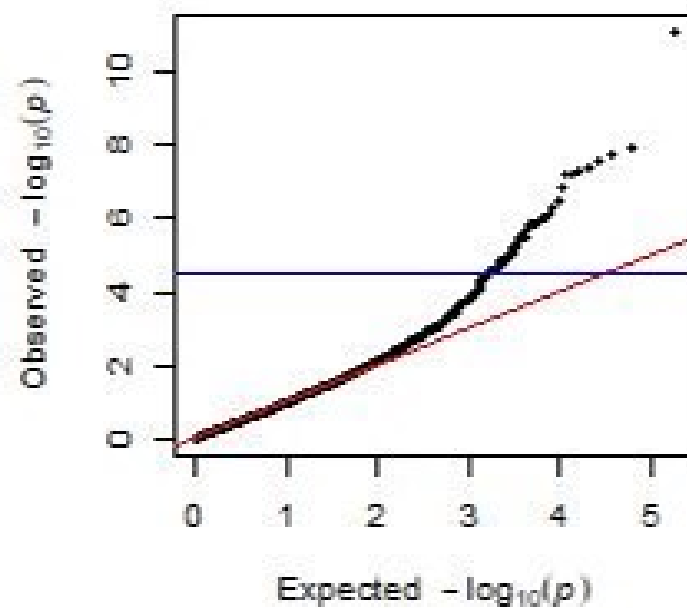

Accounting for kinship and structure

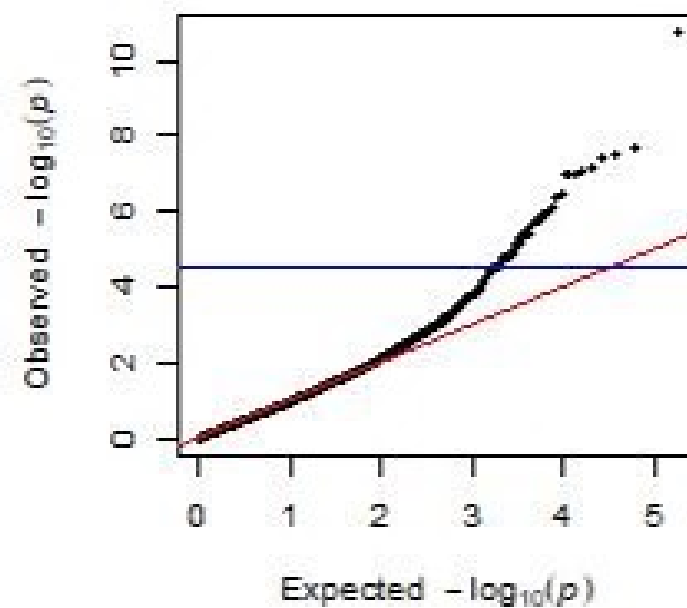

# trait: LMW\_po16

No accounting for kinship or structure

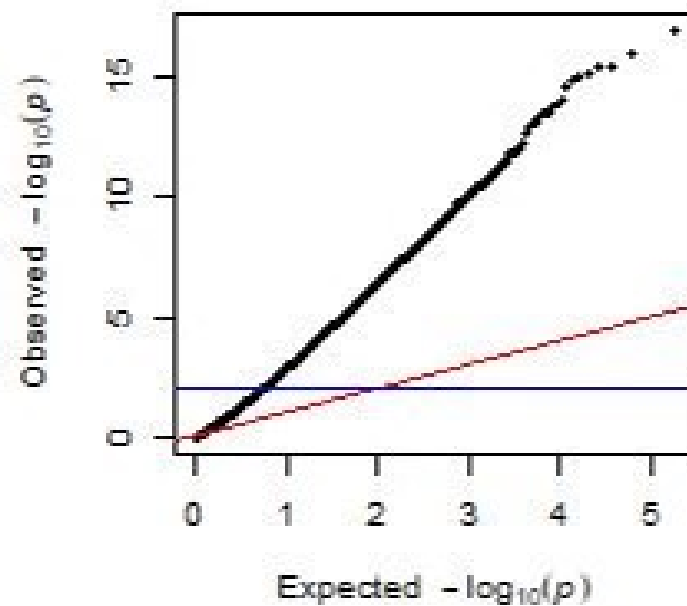

Accounting only for structure

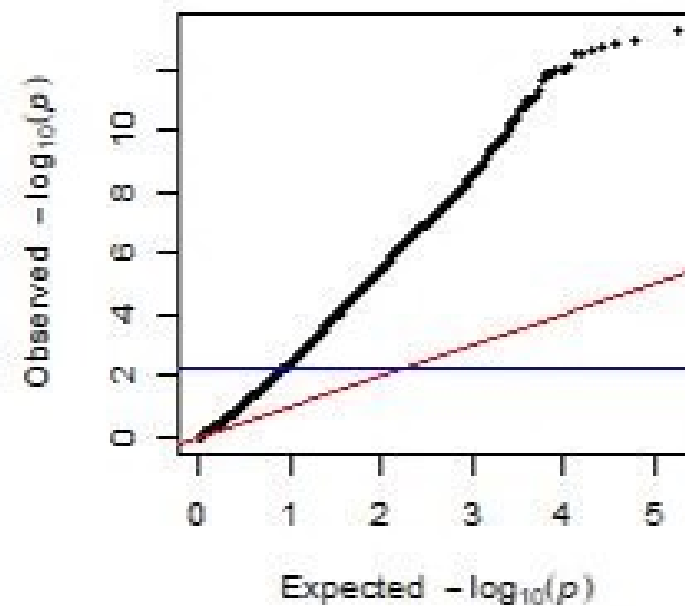

Accounting only for kinship

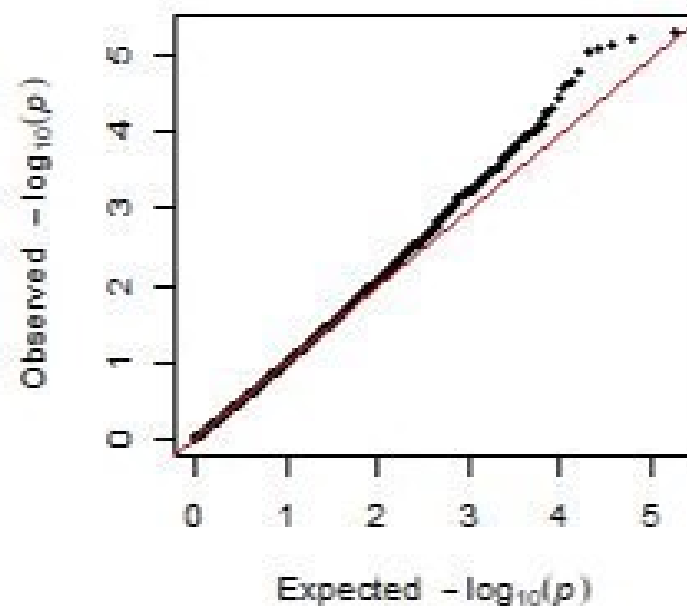

Accounting for kinship and structure

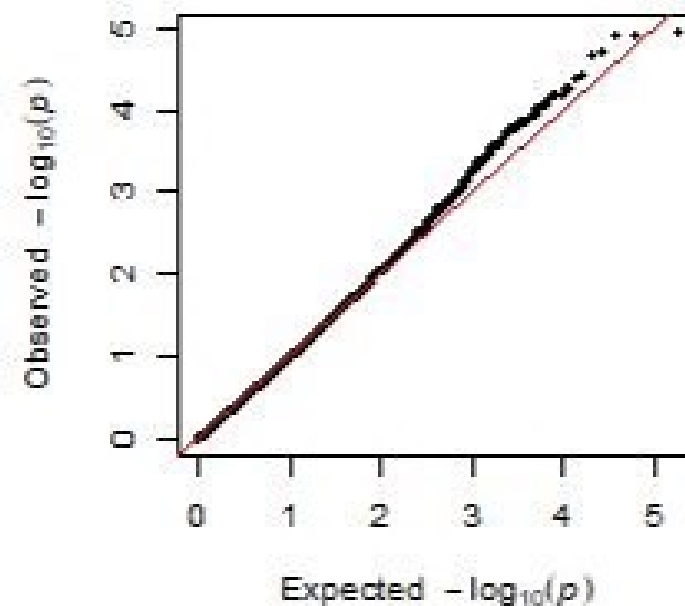

# trait: LSL\_lu17

No accounting for kinship or structure

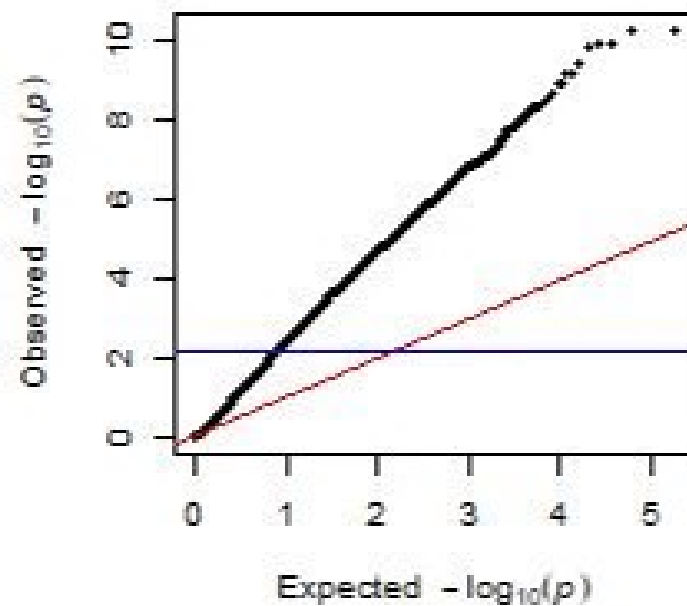

Accounting only for structure

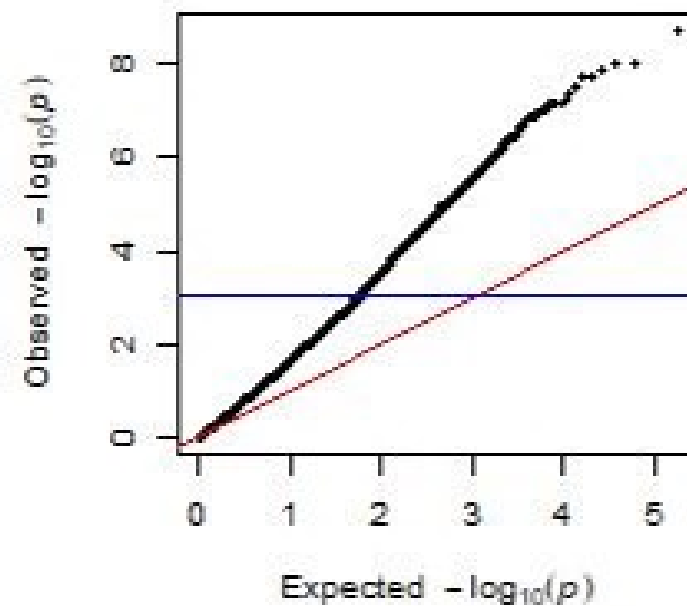

Accounting only for kinship

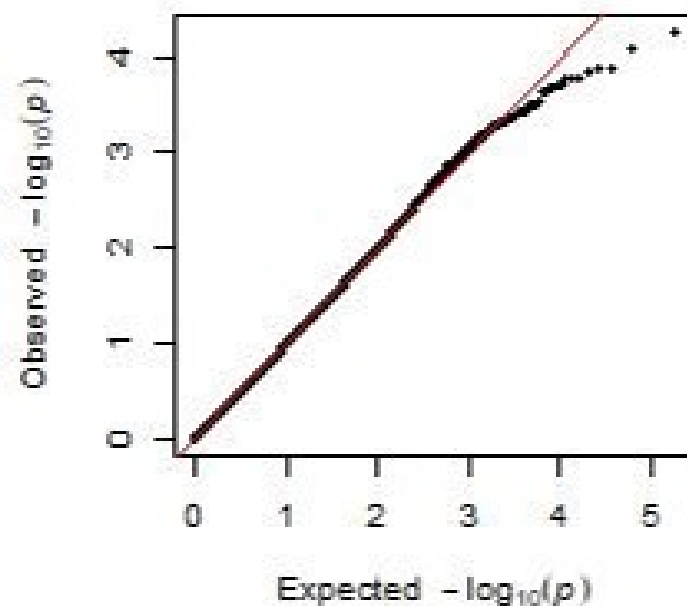

Accounting for kinship and structure

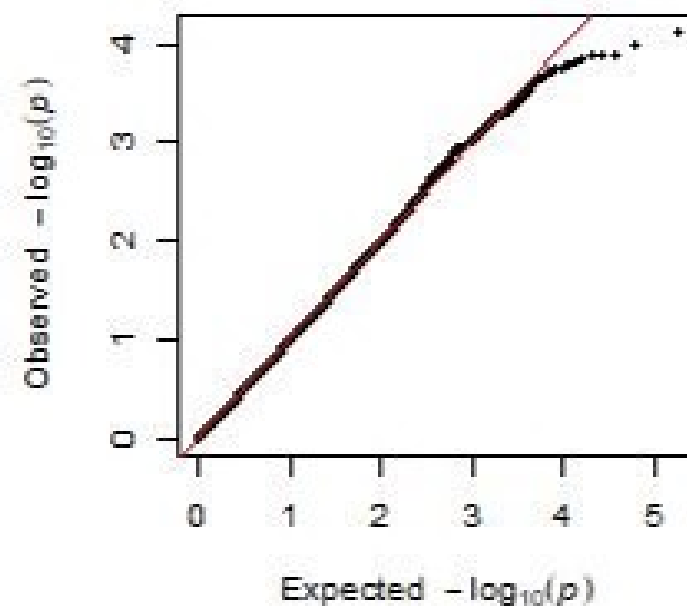

# trait: LSP\_lu17

No accounting for kinship or structure

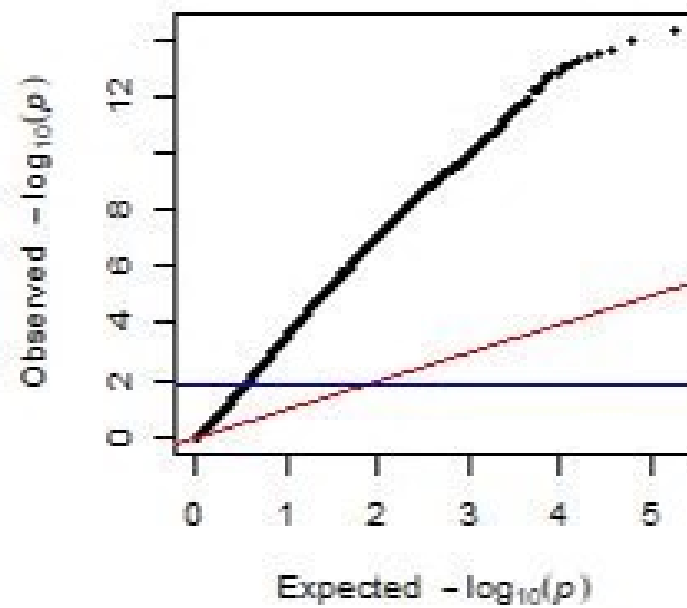

Accounting only for structure

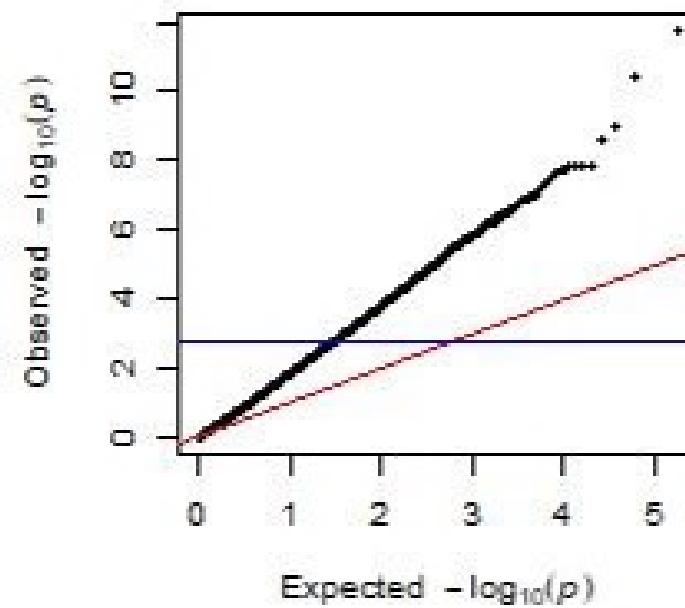

Accounting only for kinship

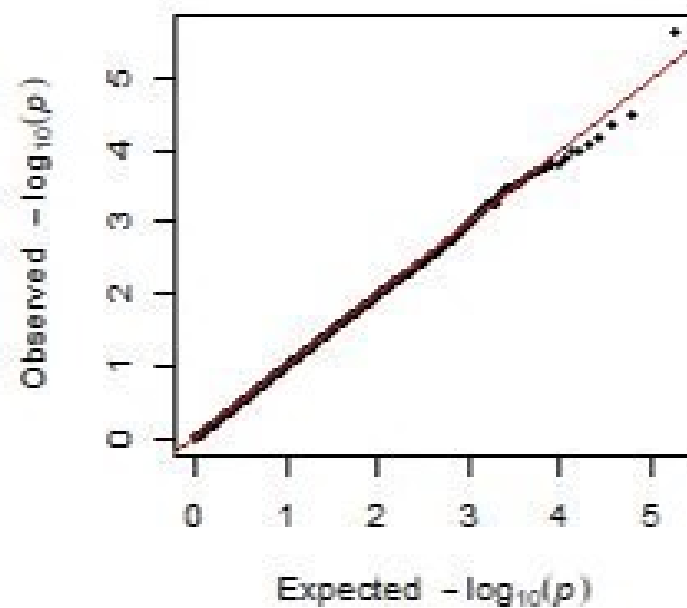

Accounting for kinship and structure

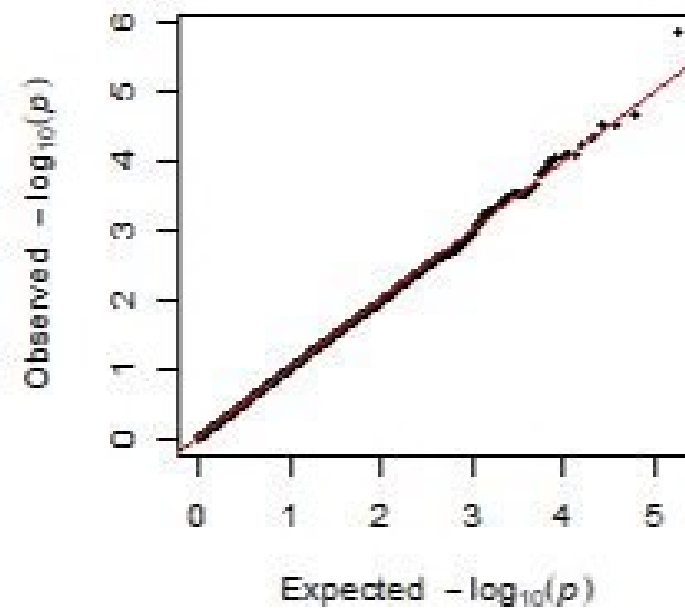

# trait: NDF\_04\_me17

No accounting for kinship or structure

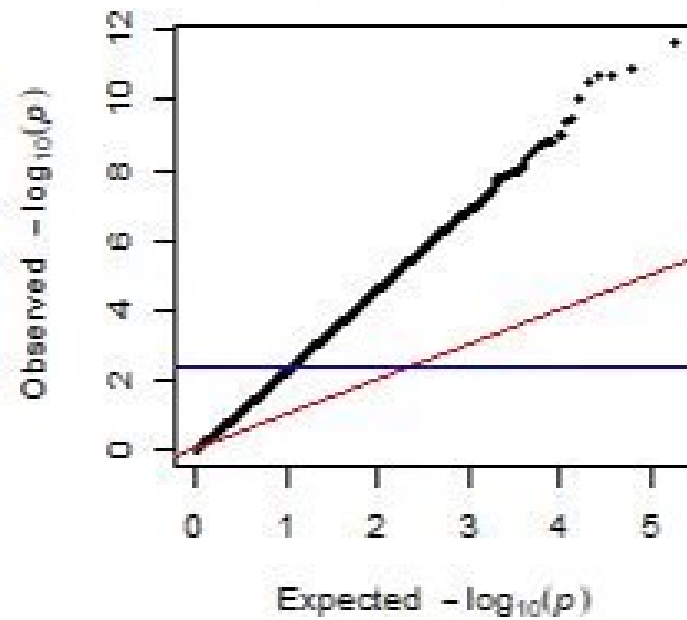

Accounting only for structure

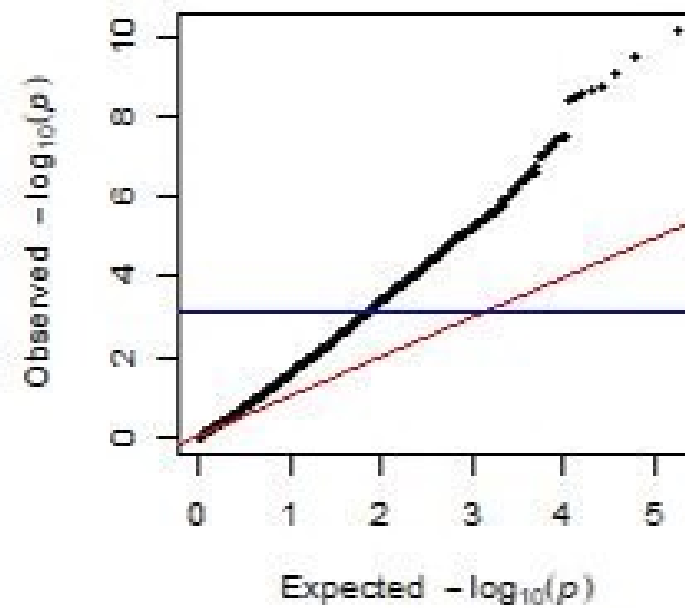

Accounting only for kinship

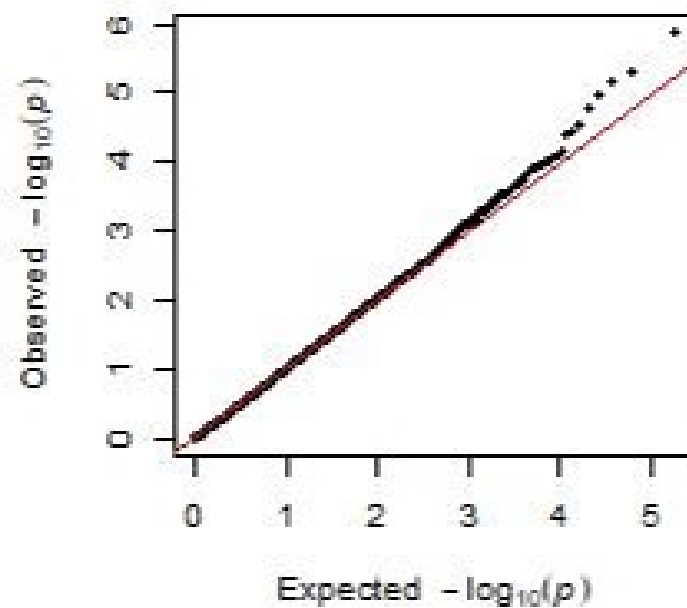

Accounting for kinship and structure

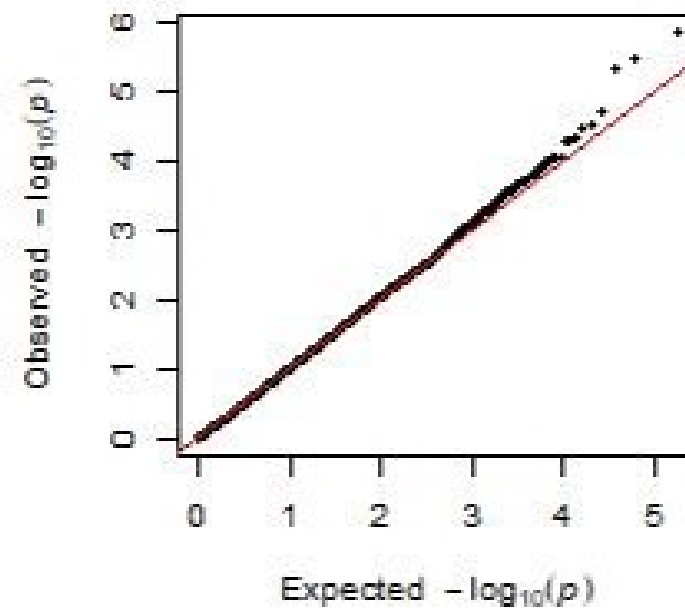

# trait: NDF\_10\_lu17

No accounting for kinship or structure

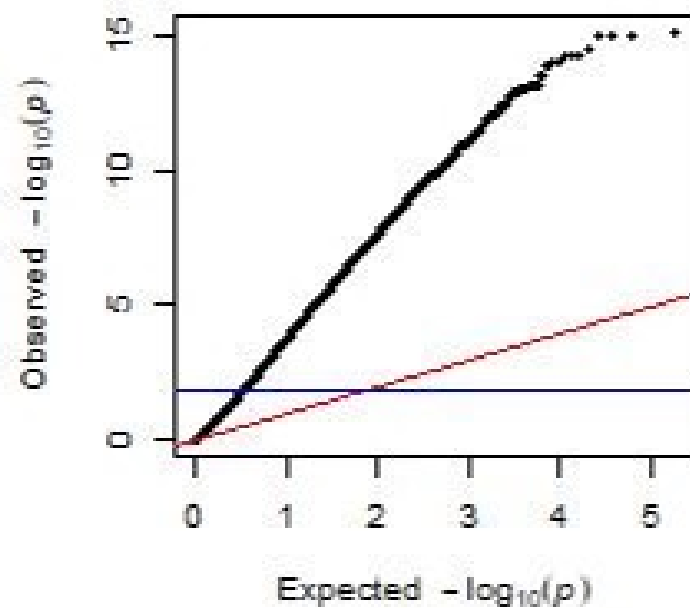

Accounting only for structure

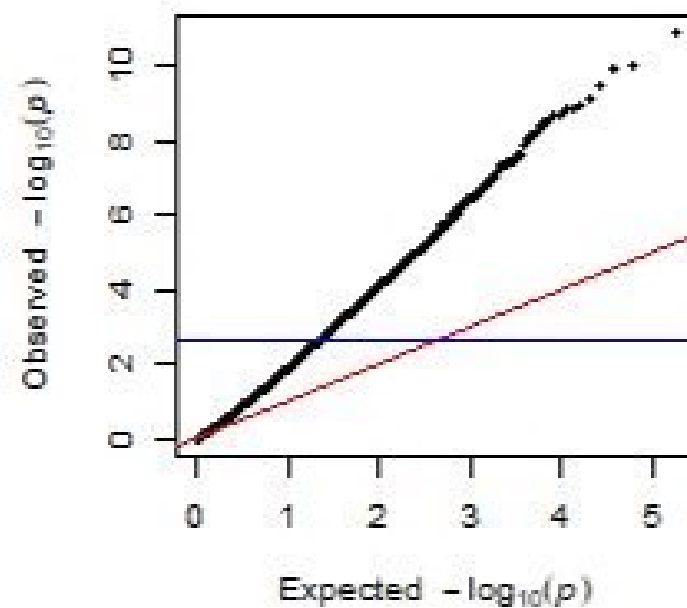

Accounting only for kinship

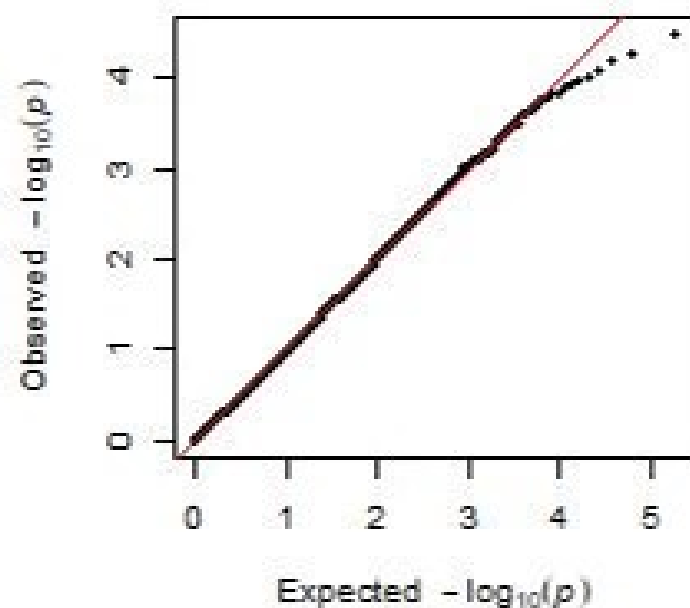

Accounting for kinship and structure

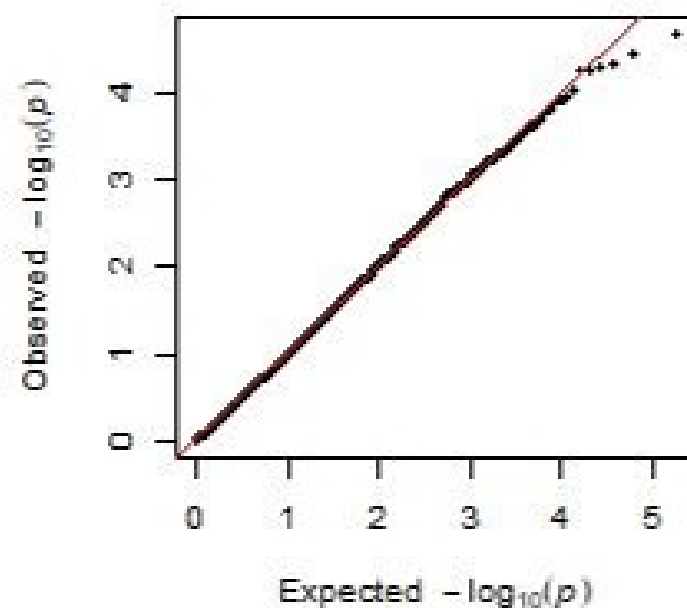

# trait: NDF\_avg

No accounting for kinship or structure

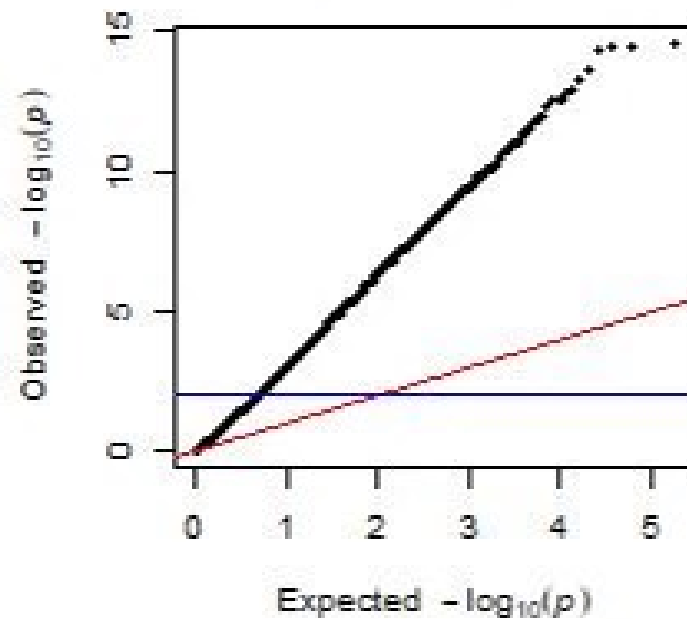

Accounting only for structure

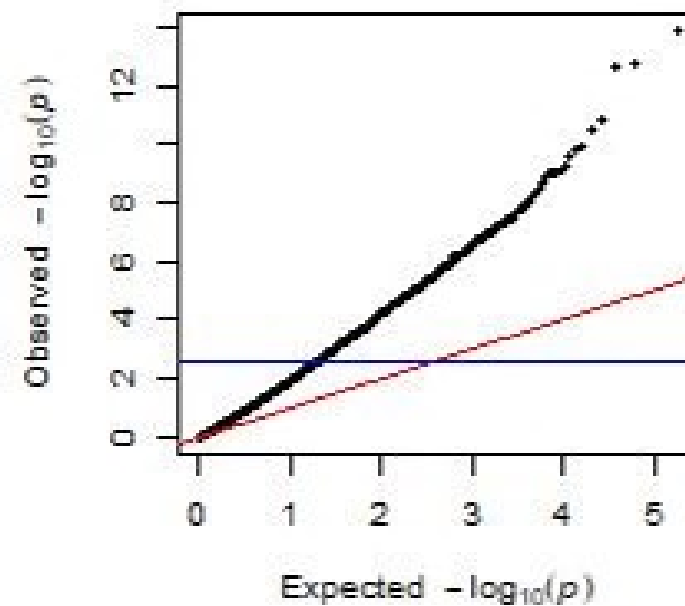

Accounting only for kinship

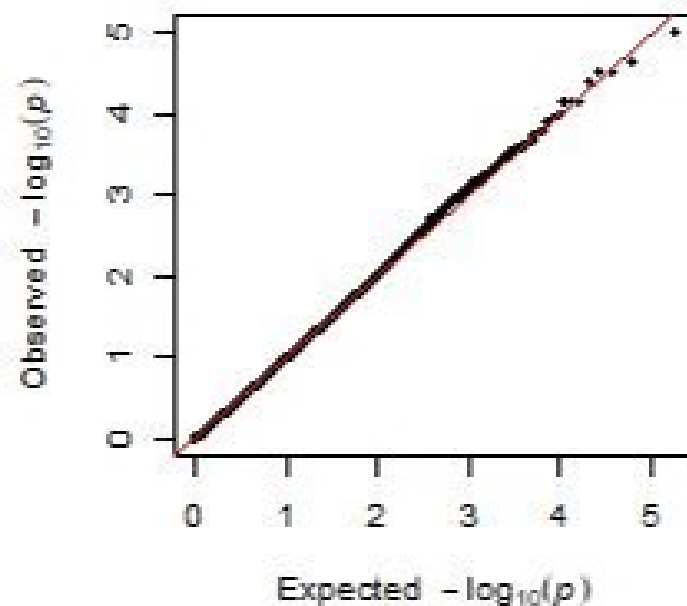

Accounting for kinship and structure

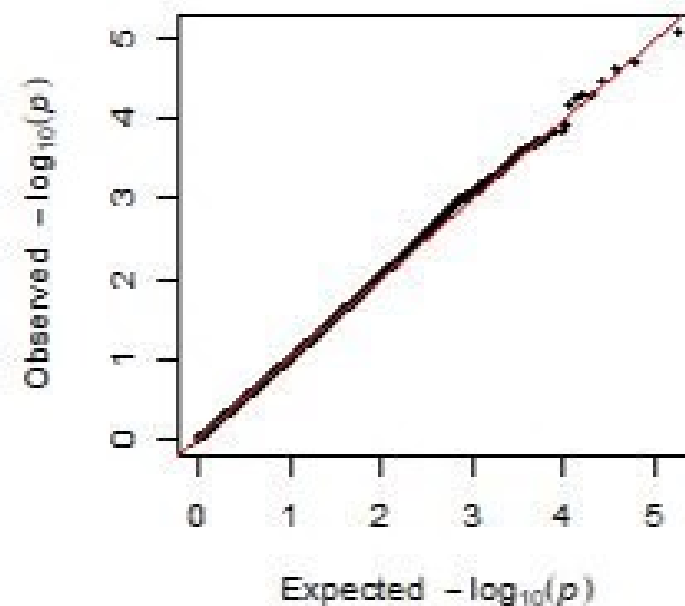

# trait: NLI\_lu16

No accounting for kinship or structure

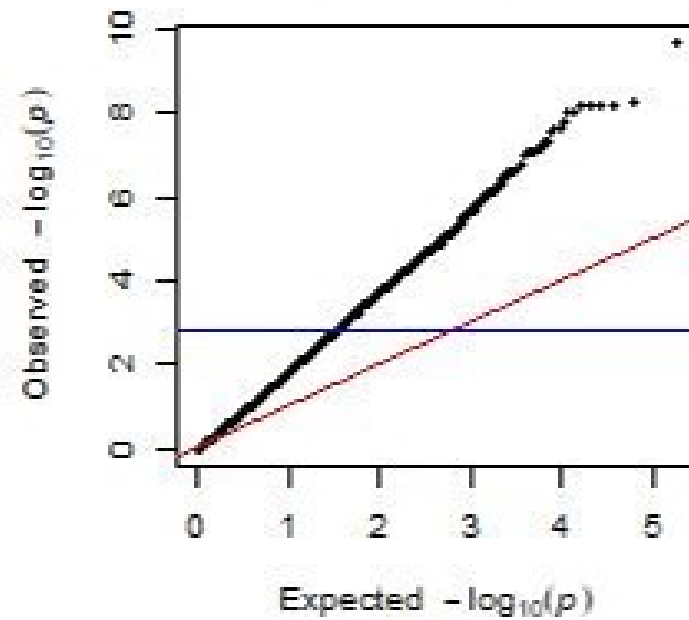

Accounting only for structure

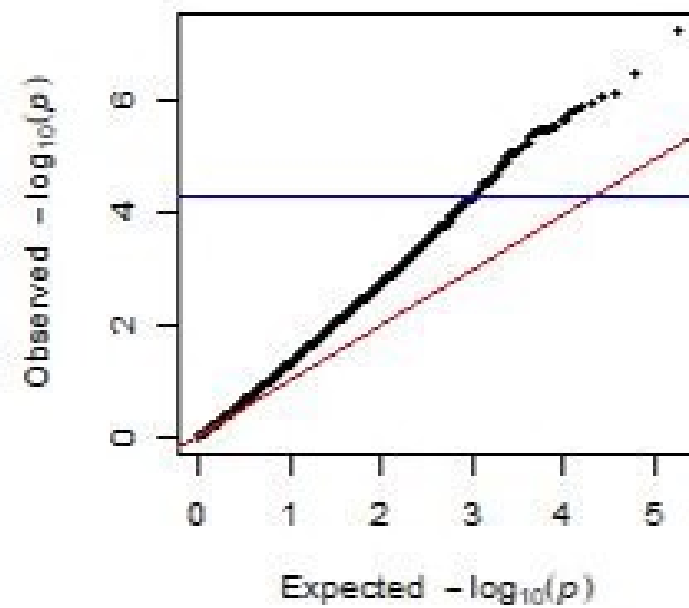

Accounting only for kinship

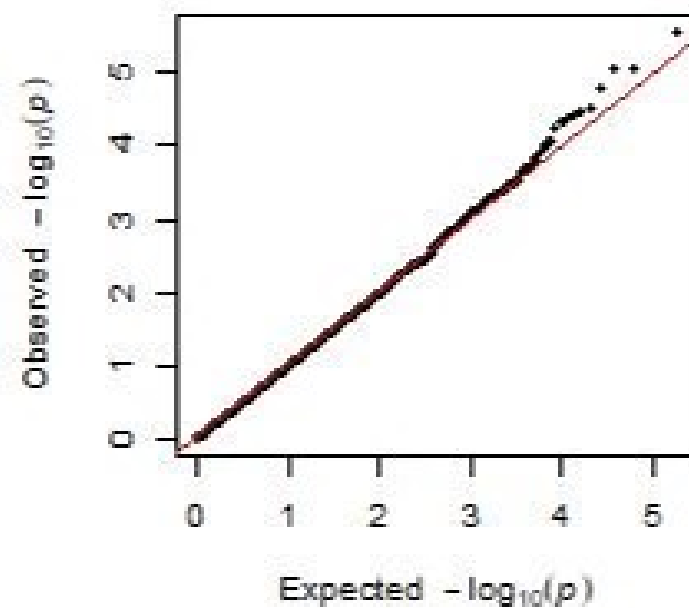

Accounting for kinship and structure

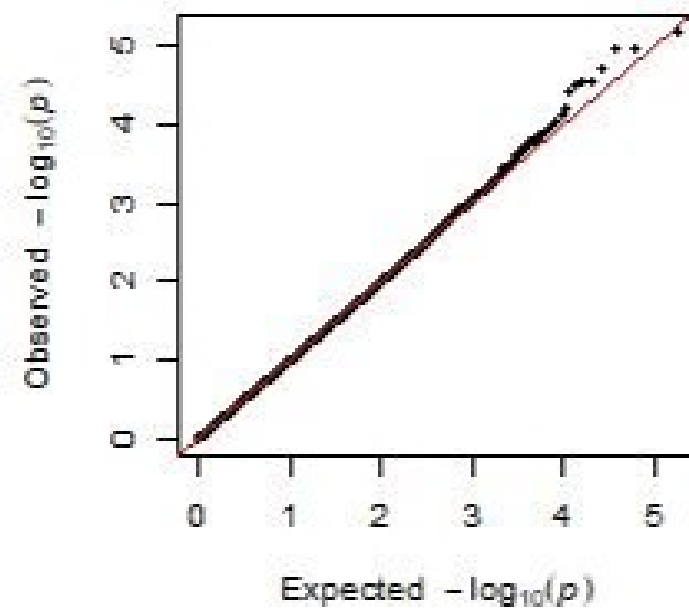



# trait: NSL\_lu17

No accounting for kinship or structure

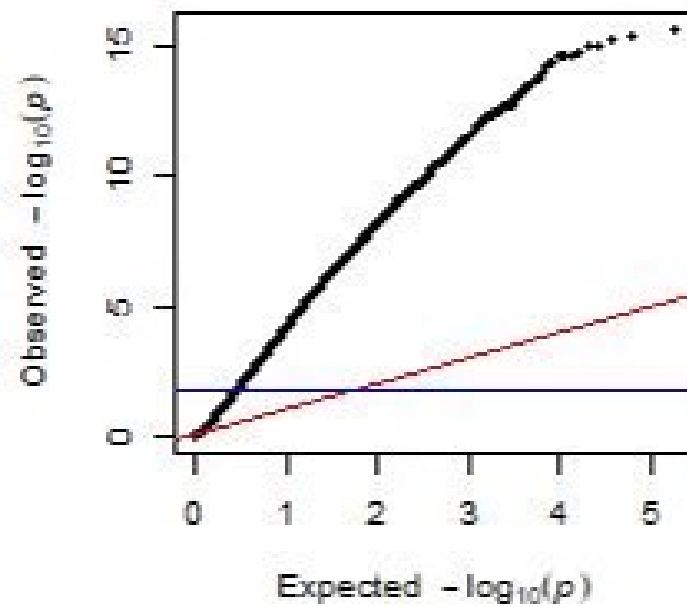

Accounting only for structure

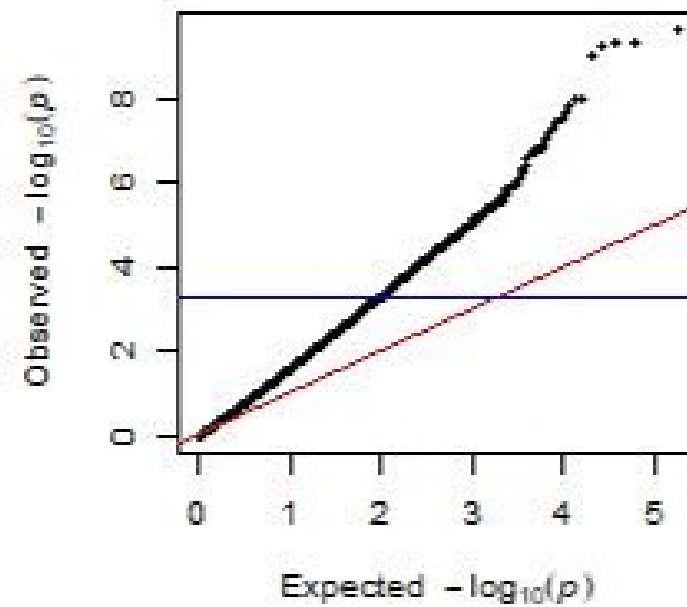

Accounting only for kinship

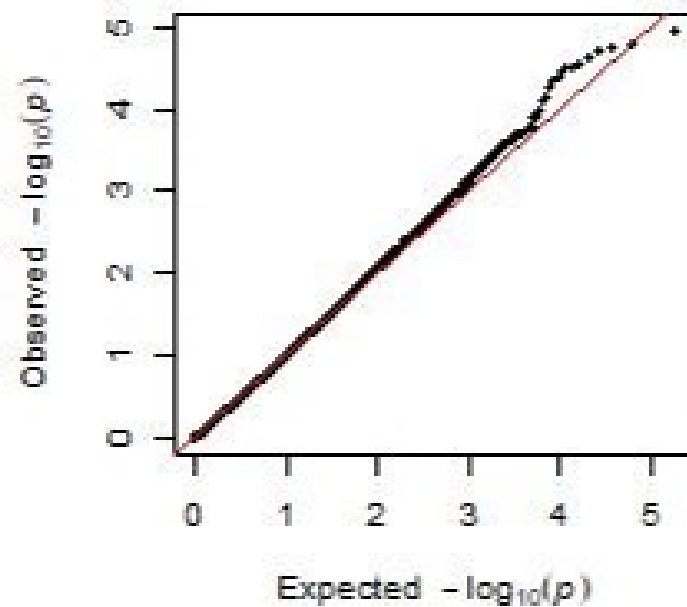

Accounting for kinship and structure

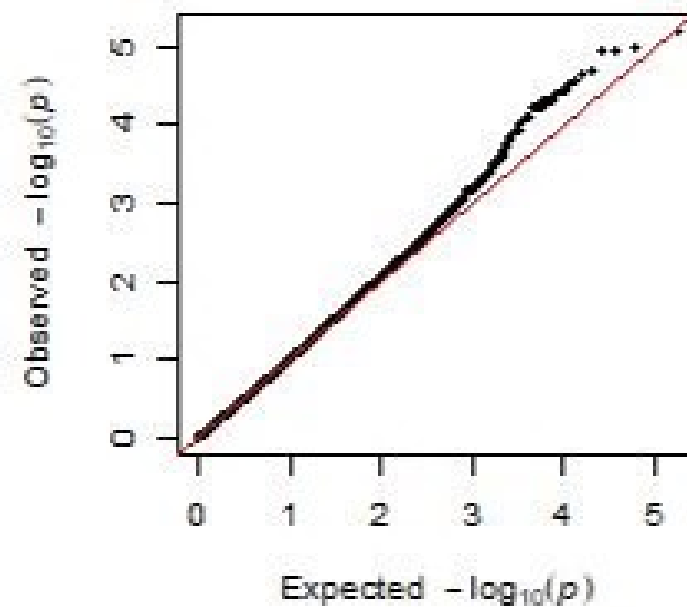

# trait: OMD\_04\_me17

No accounting for kinship or structure

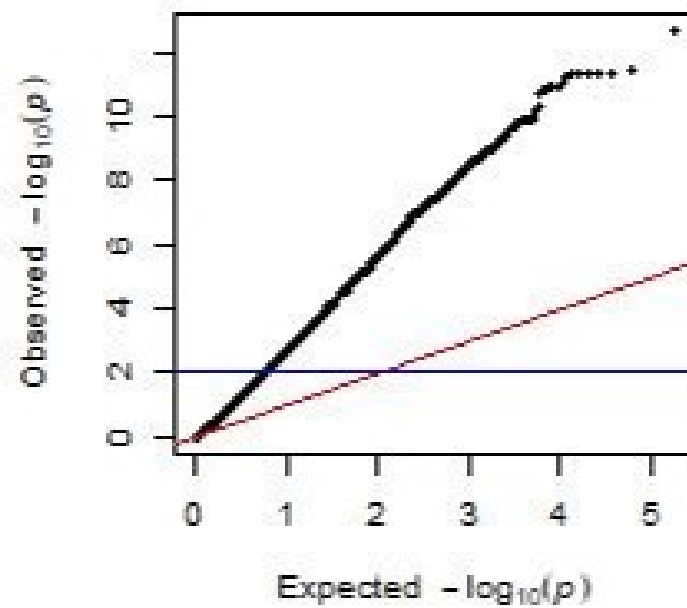

Accounting only for structure

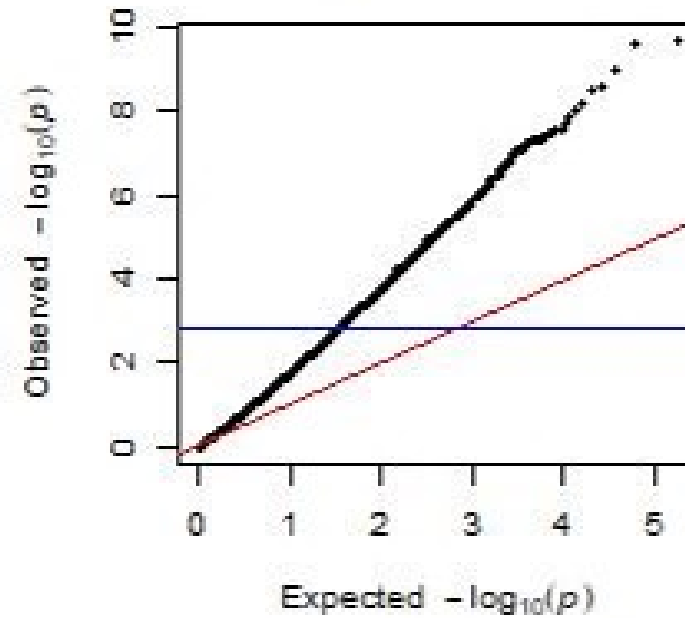

Accounting only for kinship

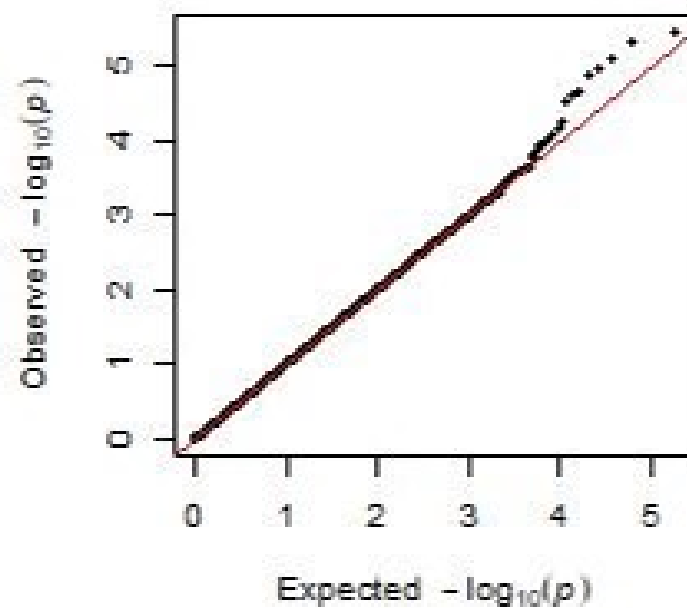

Accounting for kinship and structure

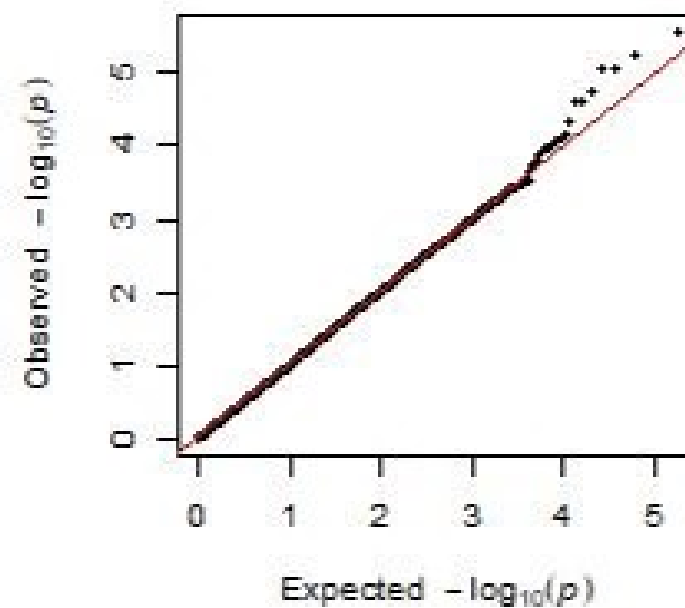

# trait: OMD\_10\_me17

No accounting for kinship or structure

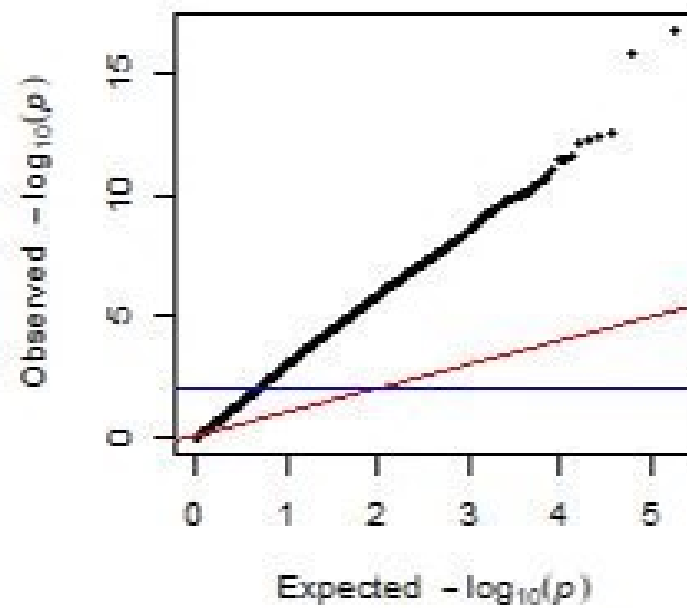

Accounting only for structure

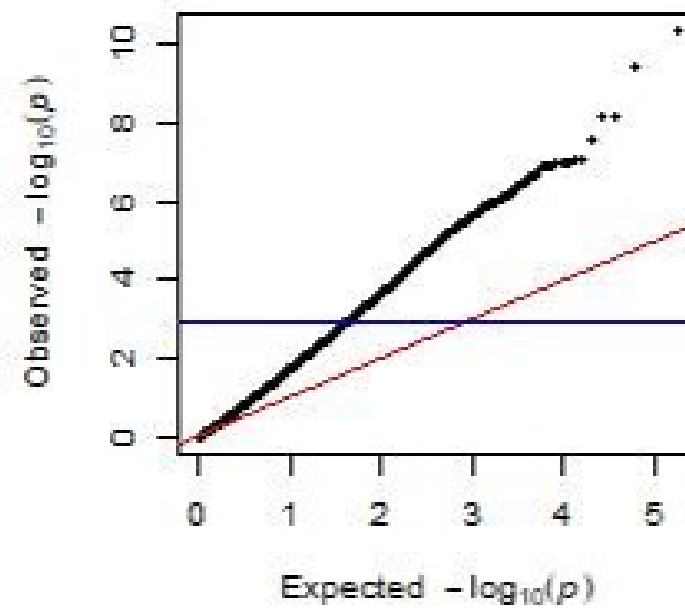

Accounting only for kinship

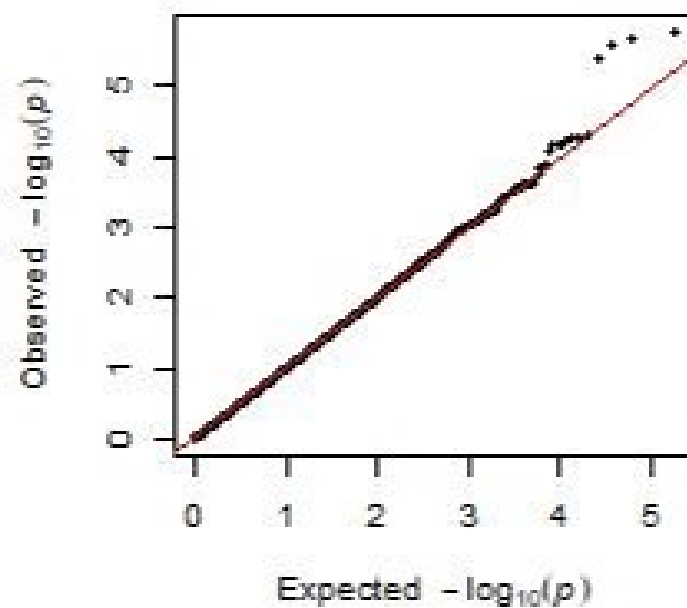

Accounting for kinship and structure

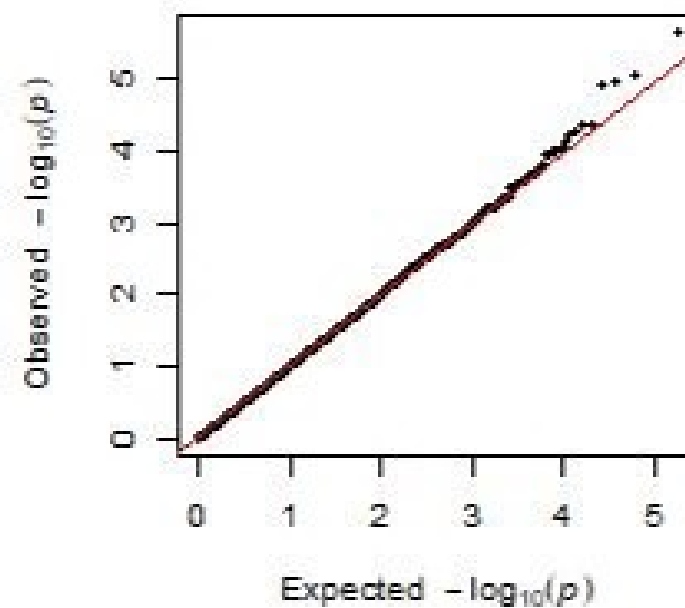

# trait: OMD\_avg

No accounting for kinship or structure

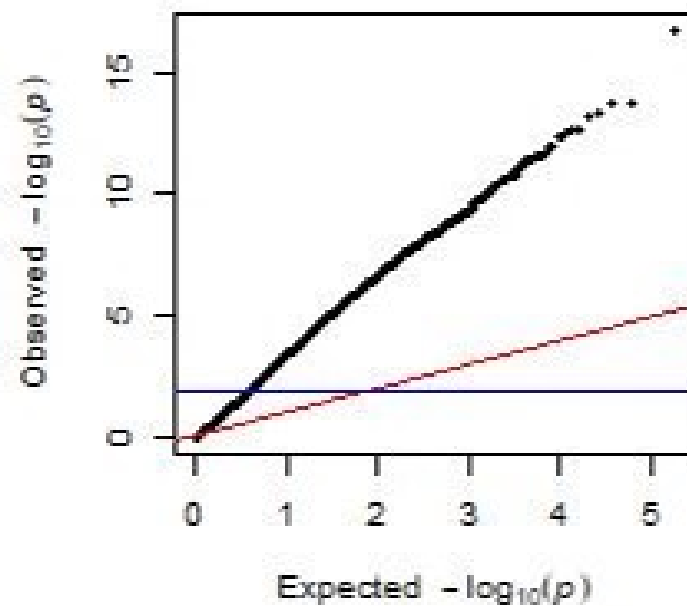

Accounting only for structure

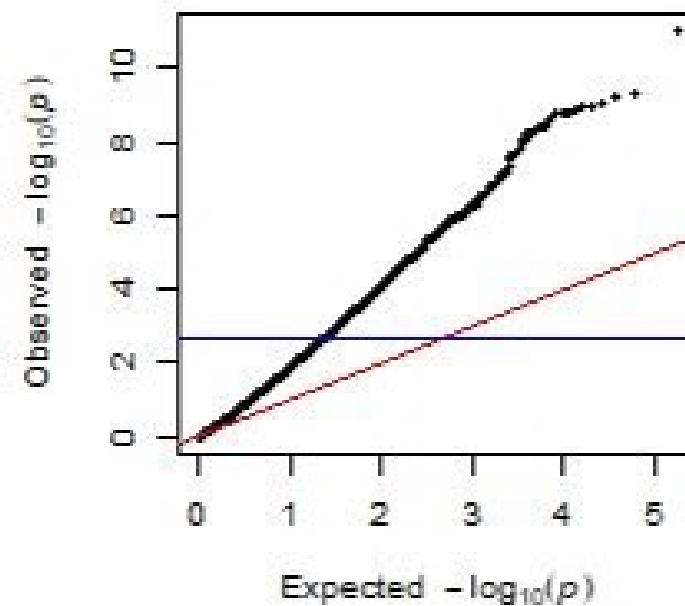

Accounting only for kinship

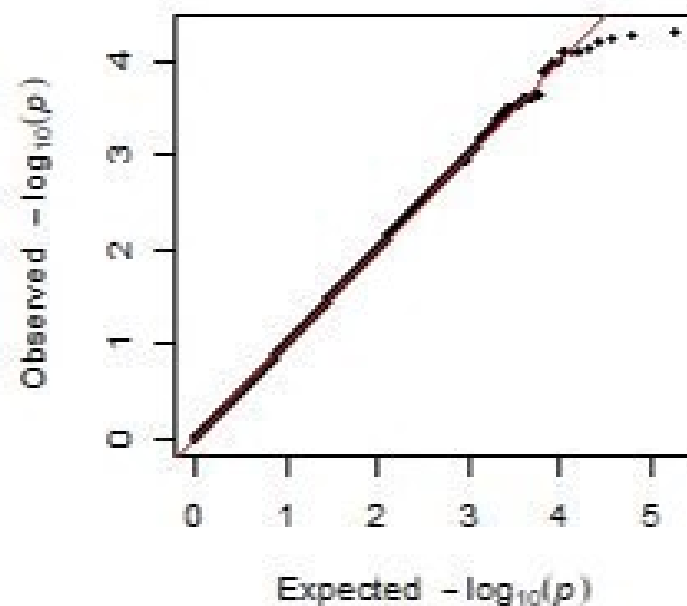

Accounting for kinship and structure

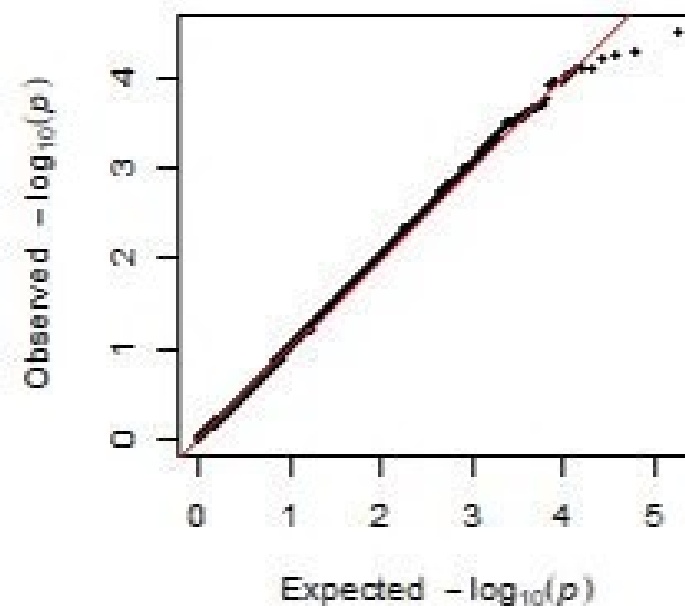

# trait: PRT\_04\_me17

No accounting for kinship or structure

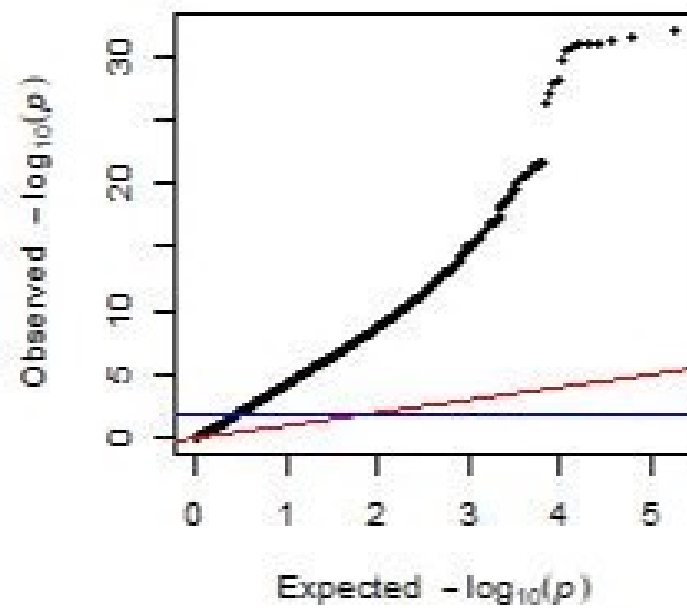

Accounting only for structure

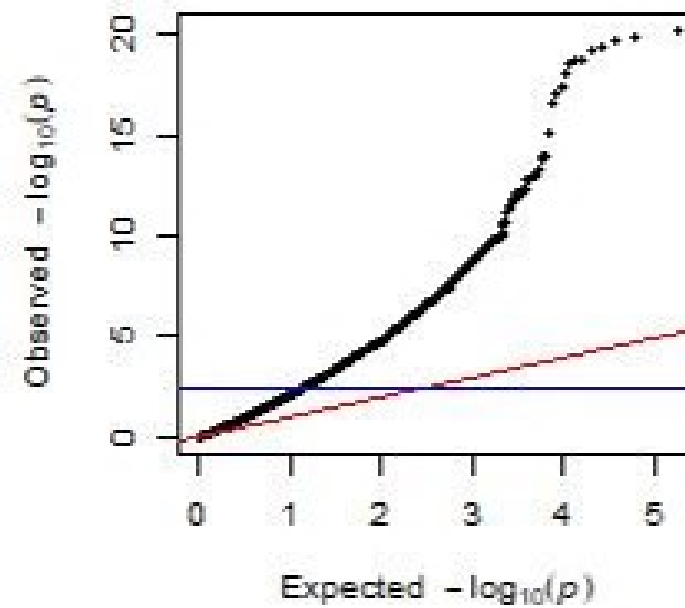

Accounting only for kinship

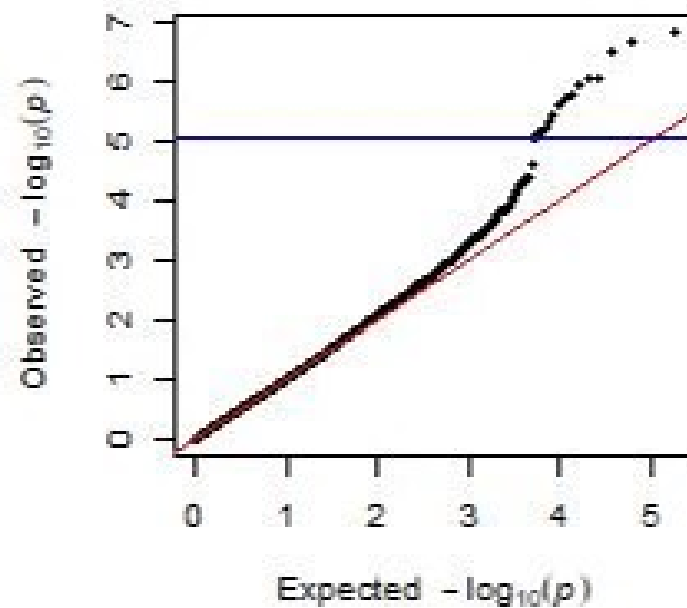

Accounting for kinship and structure

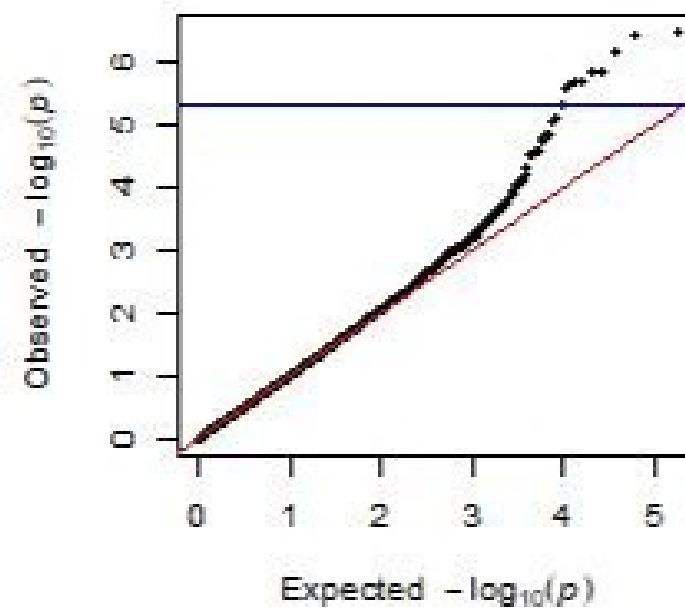

# trait: PRT\_10\_me17

No accounting for kinship or structure

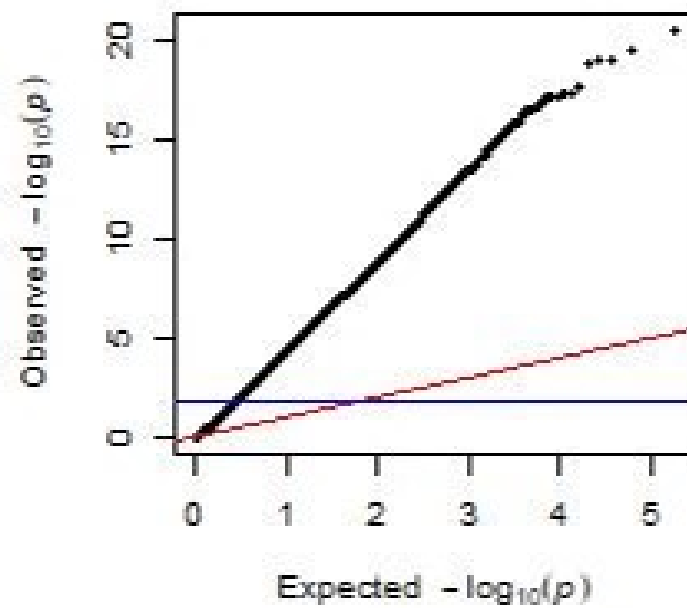

Accounting only for structure

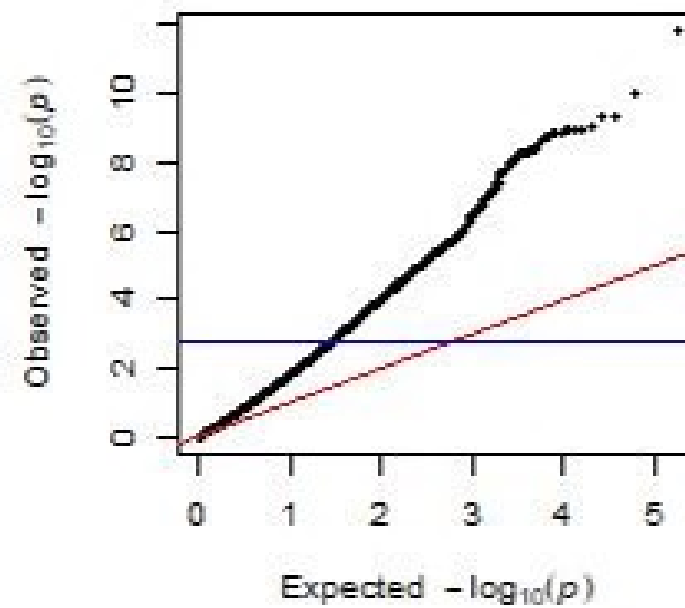

Accounting only for kinship

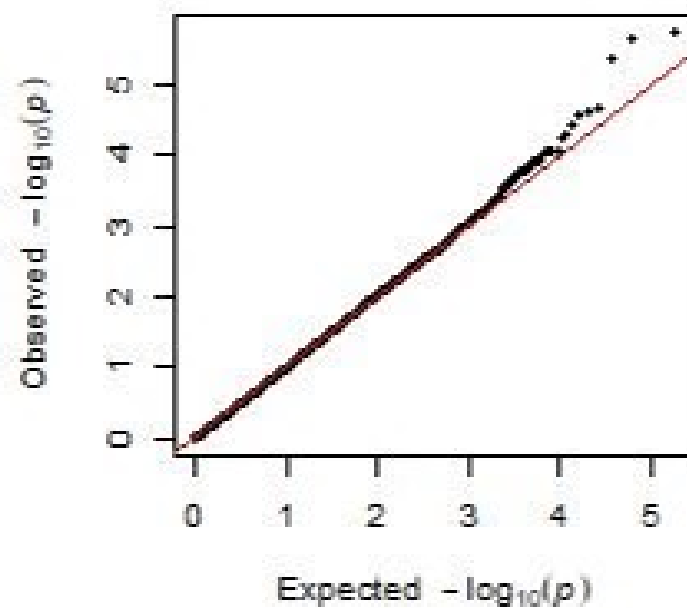

Accounting for kinship and structure

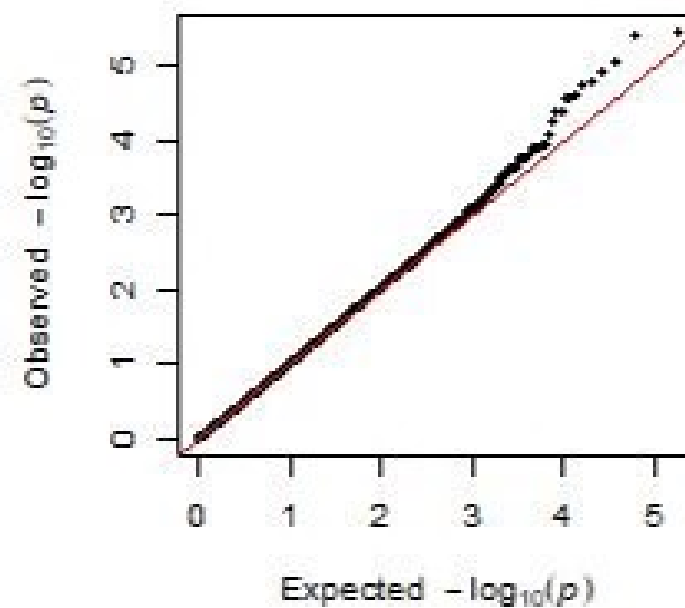

# trait: PRT\_avg

No accounting for kinship or structure

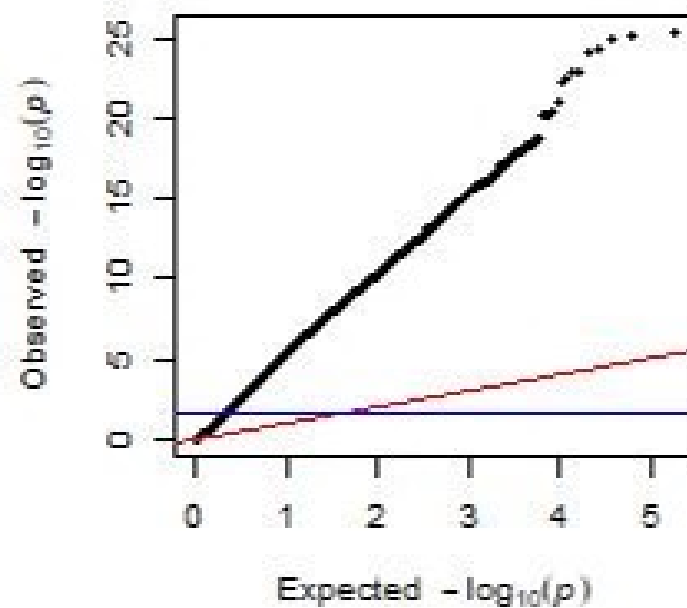

Accounting only for structure

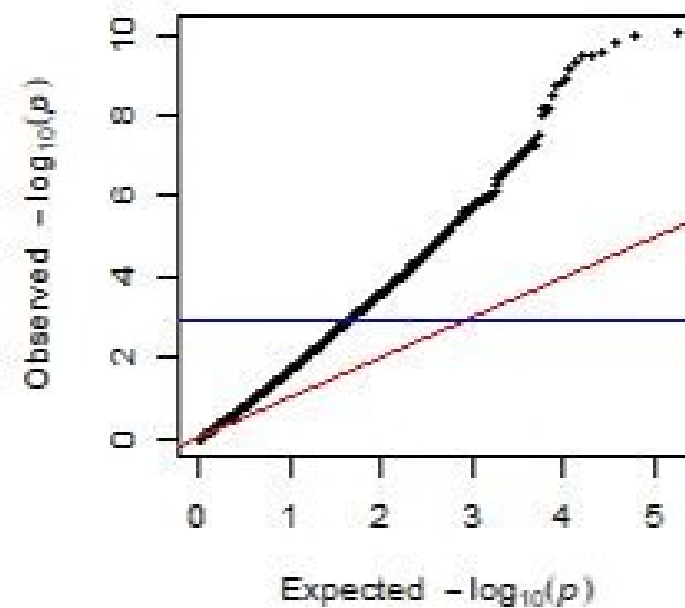

Accounting only for kinship

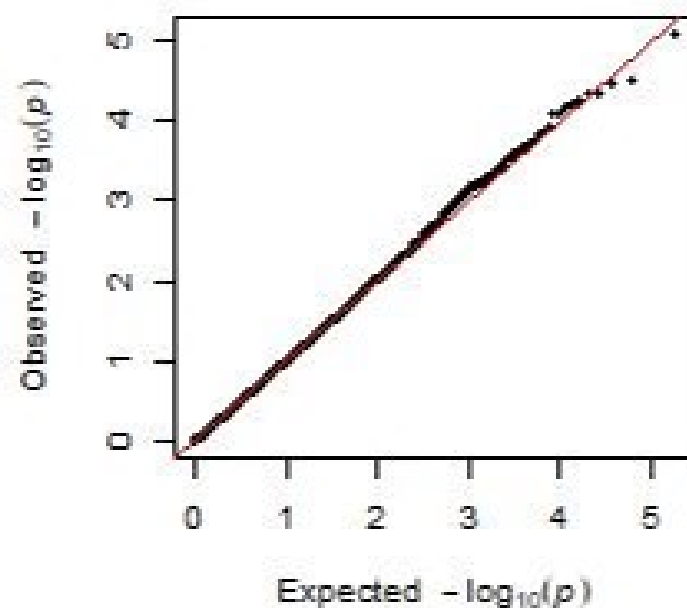

Accounting for kinship and structure

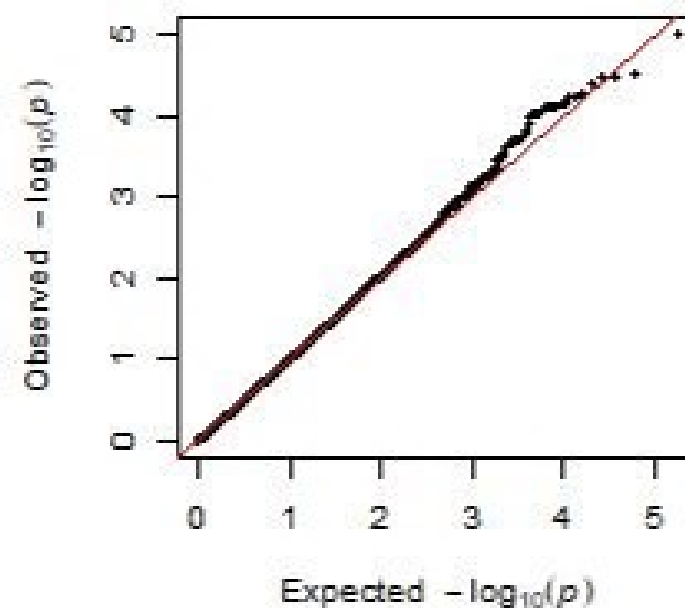

# trait: RAS\_avg

No accounting for kinship or structure

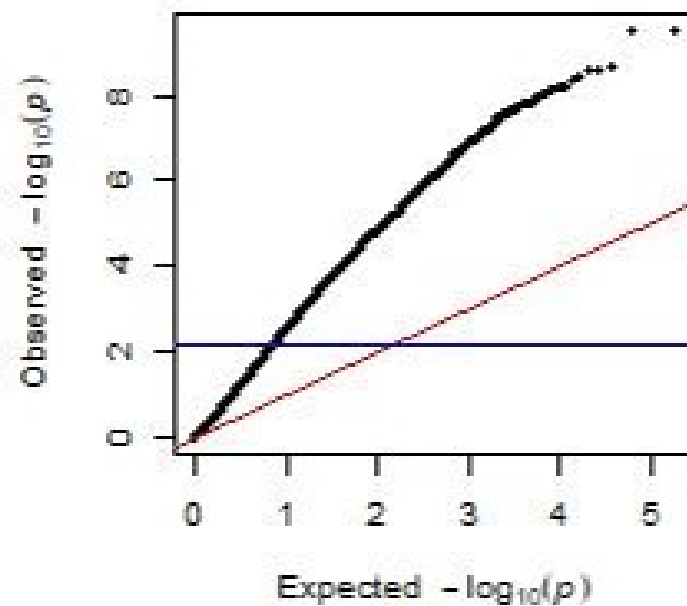

Accounting only for structure

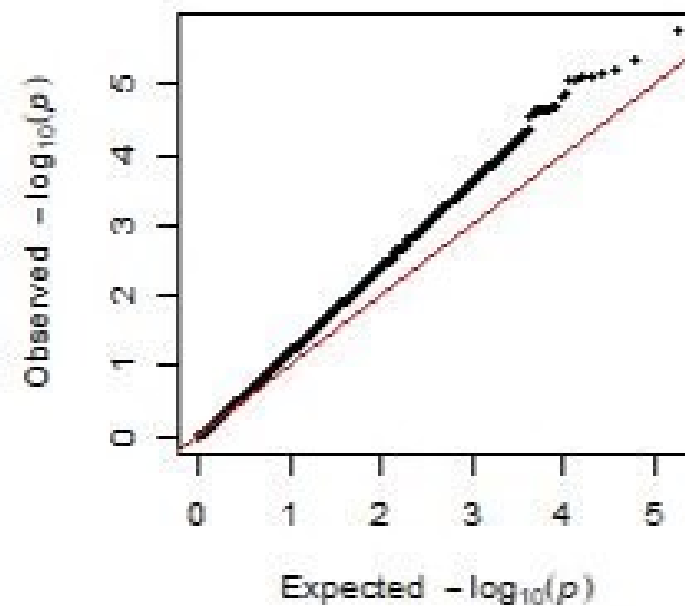

Accounting only for kinship

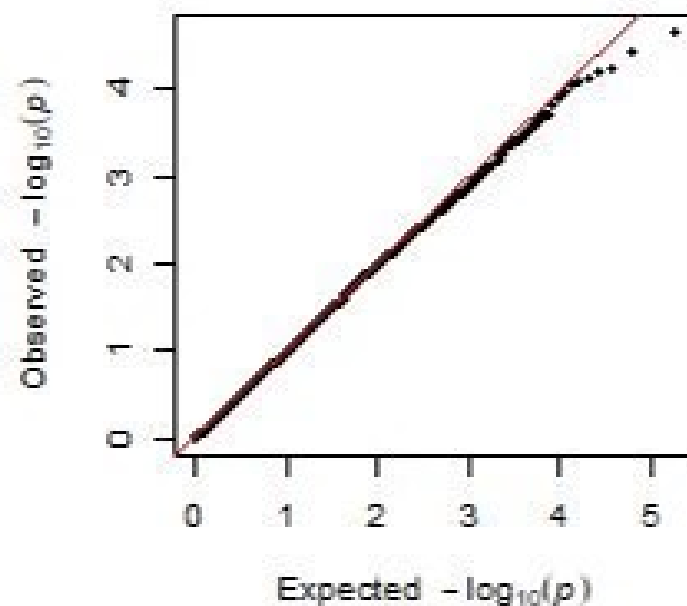

Accounting for kinship and structure

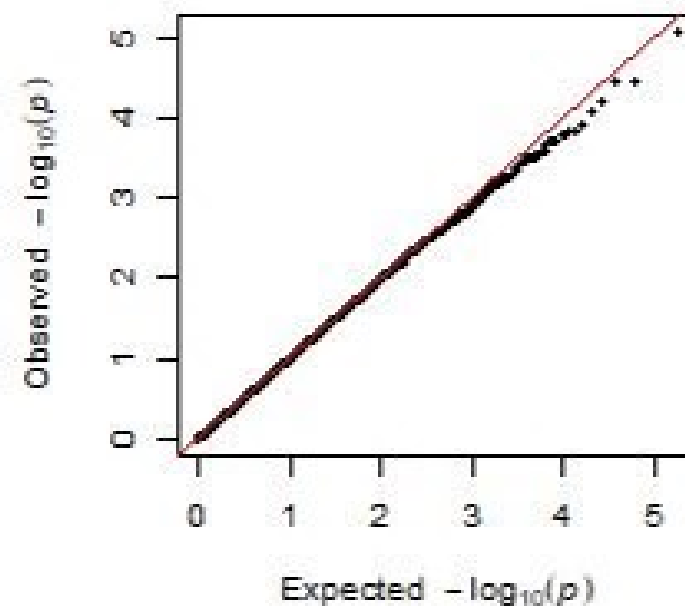



# trait: RAS\_lu15

No accounting for kinship or structure

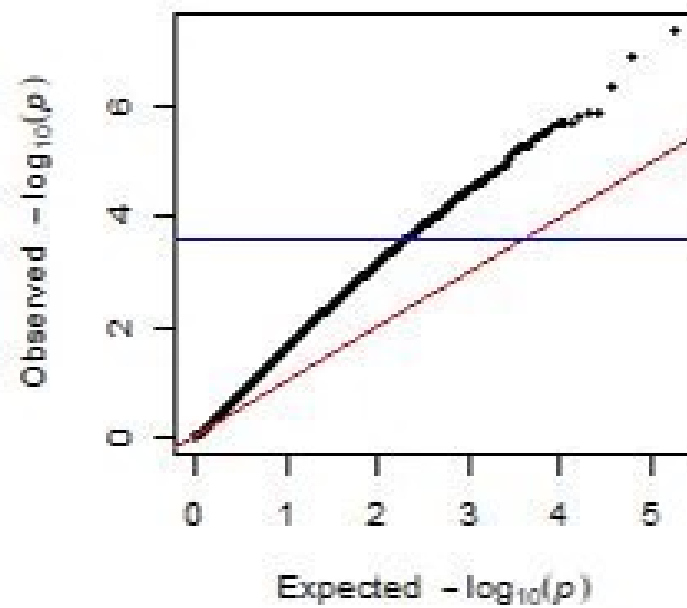

Accounting only for structure

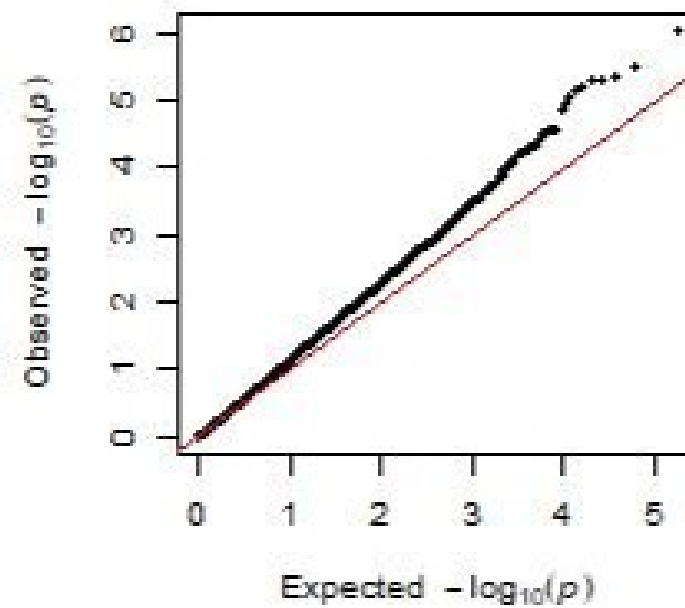

Accounting only for kinship

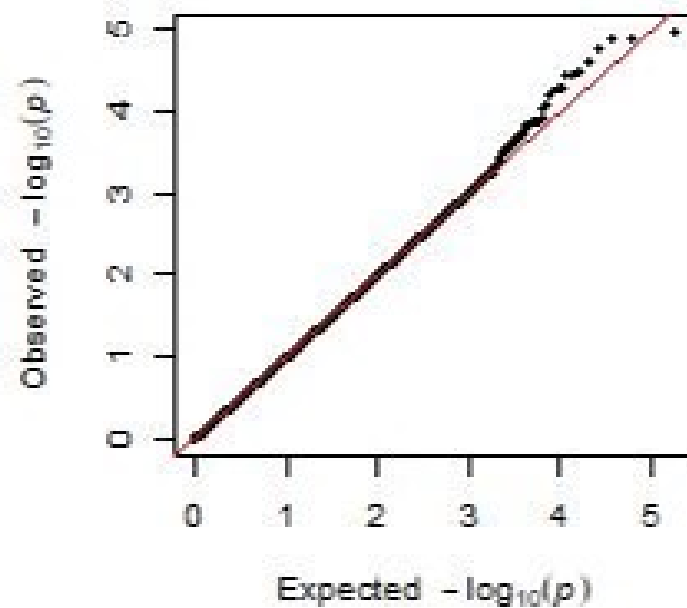

Accounting for kinship and structure

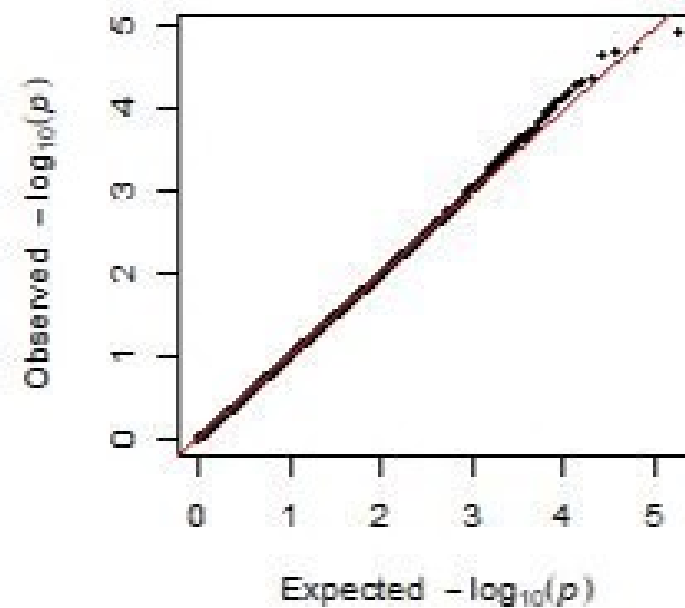

# trait: RAS\_me15

No accounting for kinship or structure

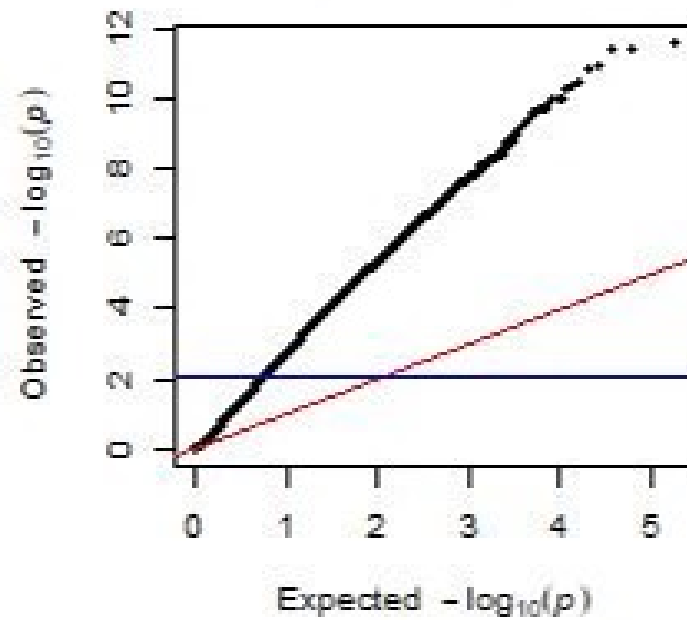

Accounting only for structure

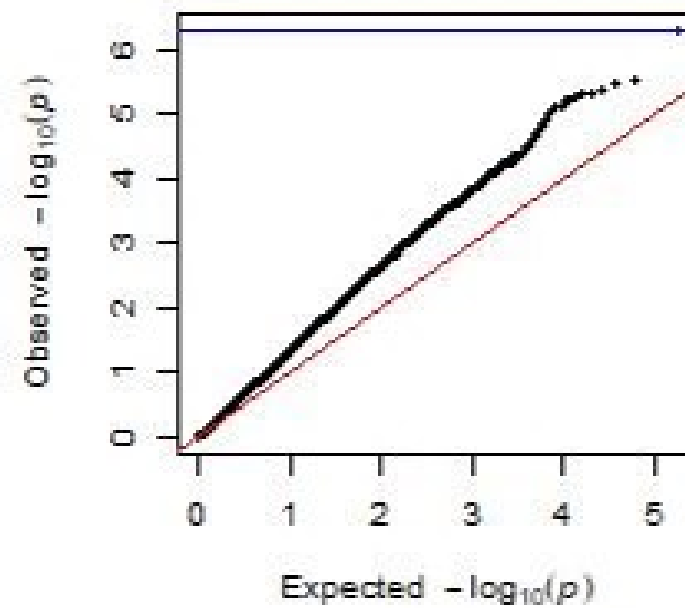

Accounting only for kinship

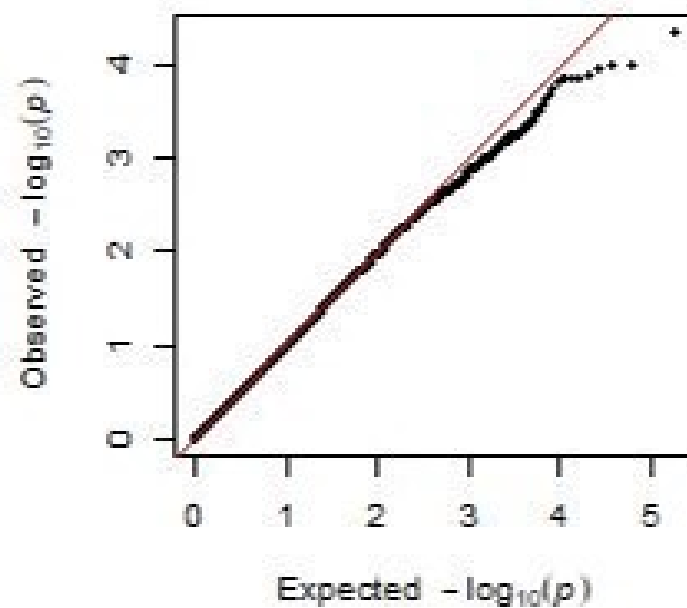

Accounting for kinship and structure

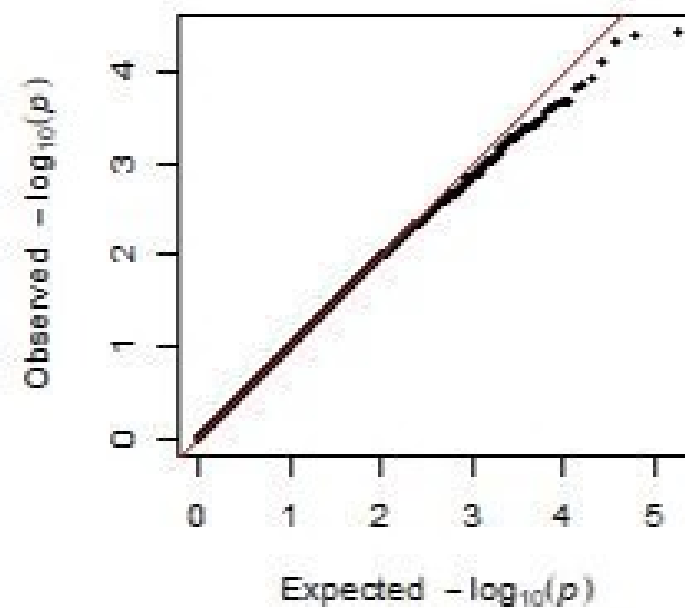

# trait: RAS\_po15

No accounting for kinship or structure

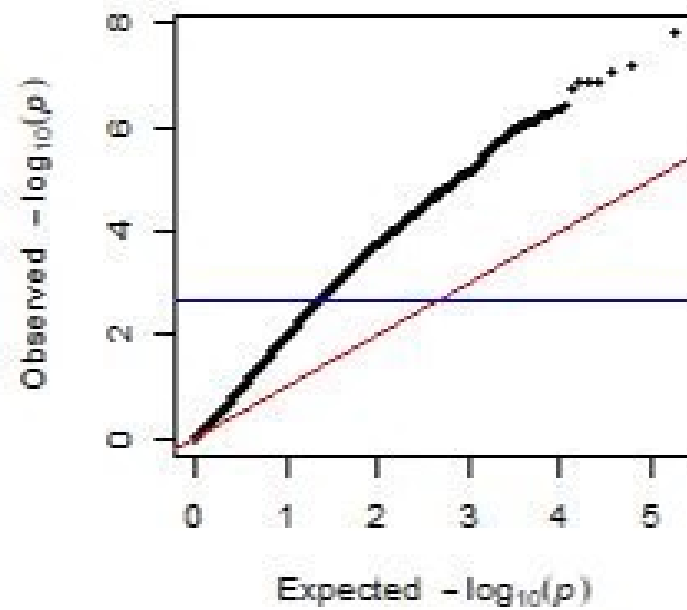

Accounting only for structure

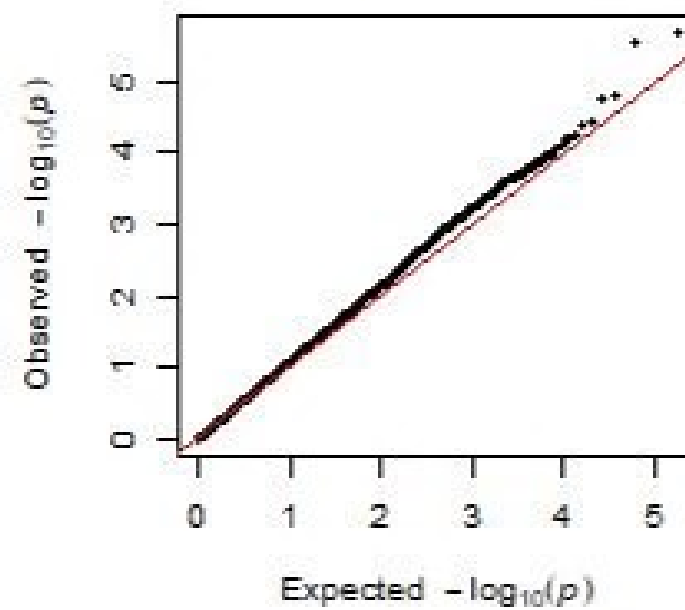

Accounting only for kinship

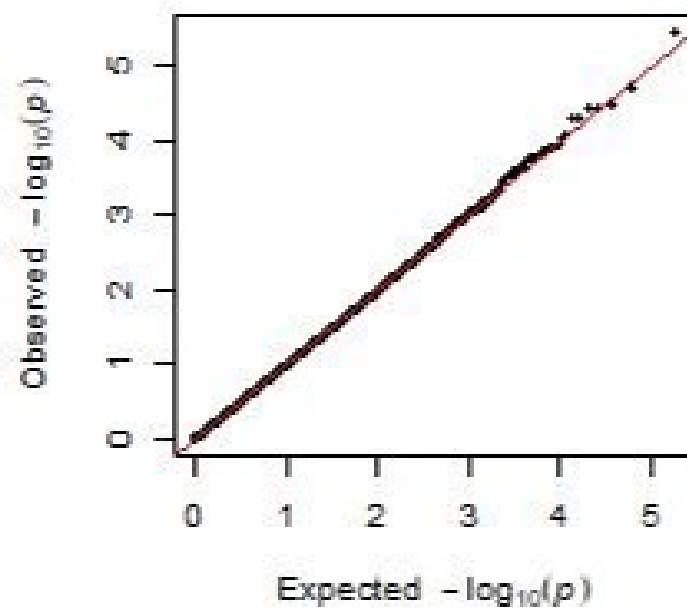

Accounting for kinship and structure

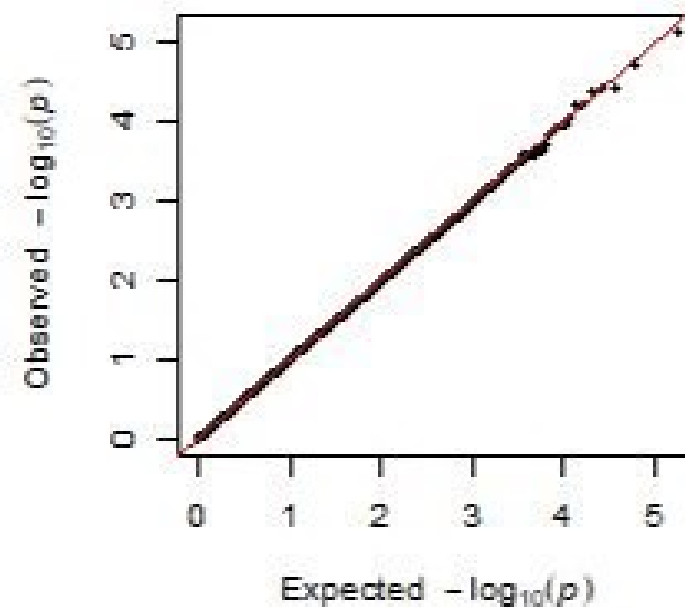

# trait: resCH300h\_lu16

No accounting for kinship or structure

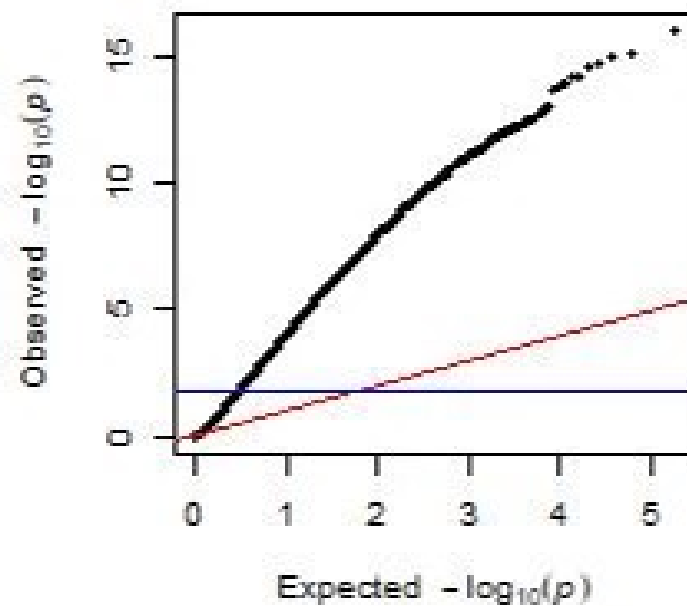

Accounting only for structure

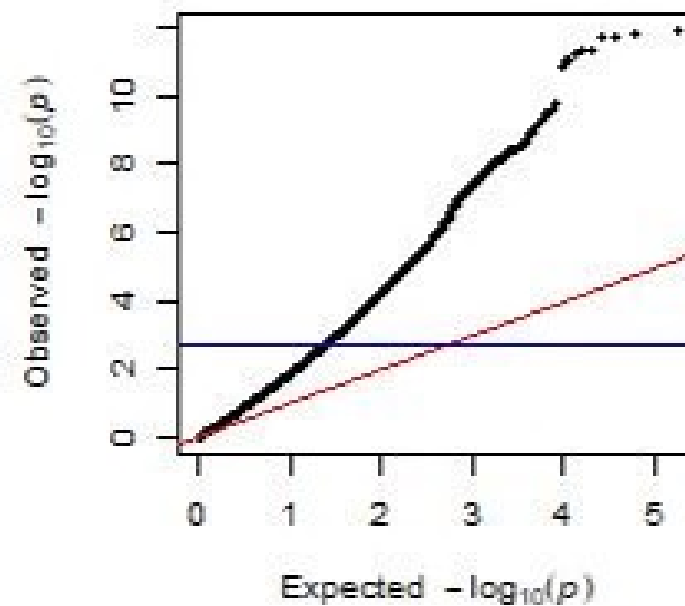

Accounting only for kinship

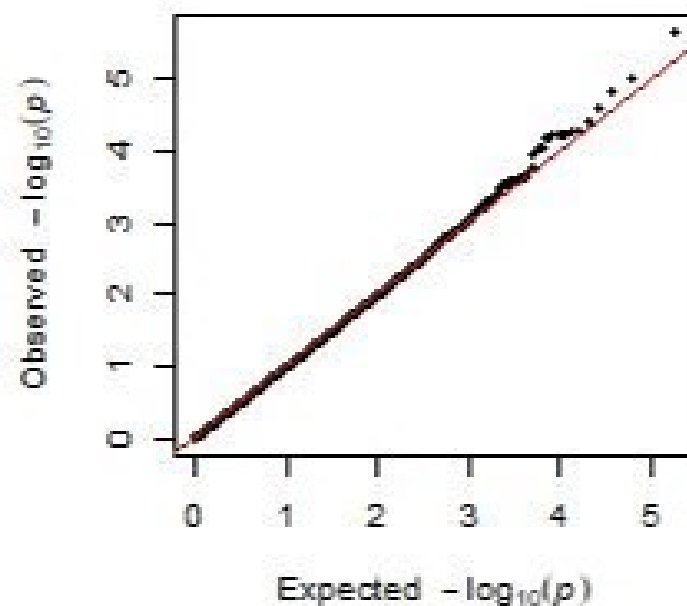

Accounting for kinship and structure

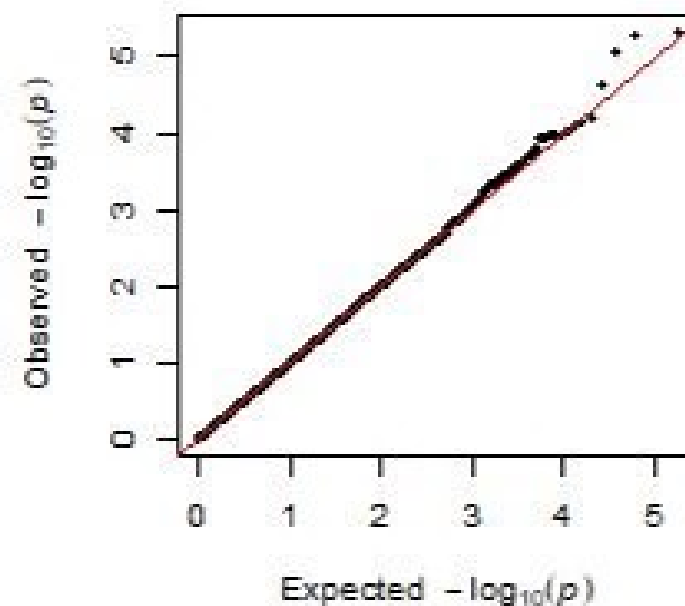

# trait: resCH300h\_lu17

No accounting for kinship or structure

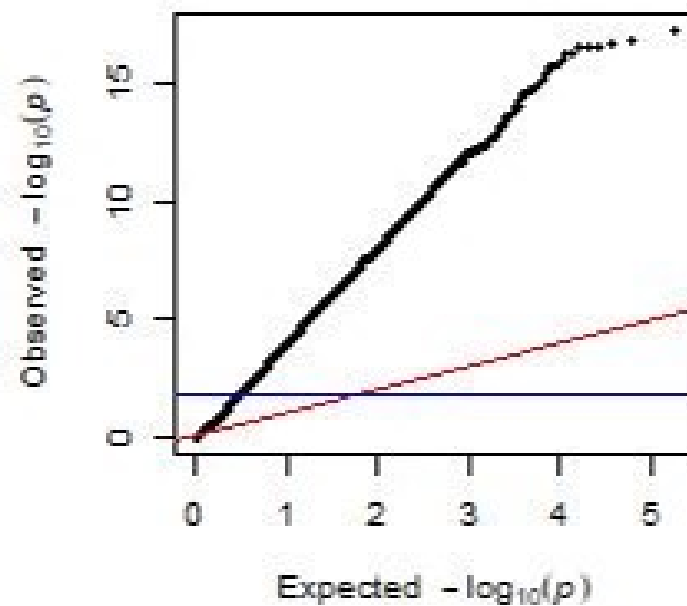

Accounting only for structure

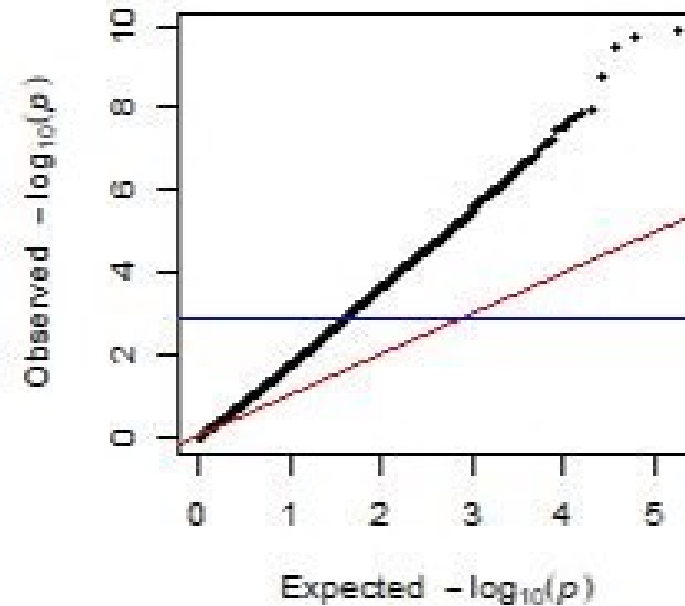

Accounting only for kinship

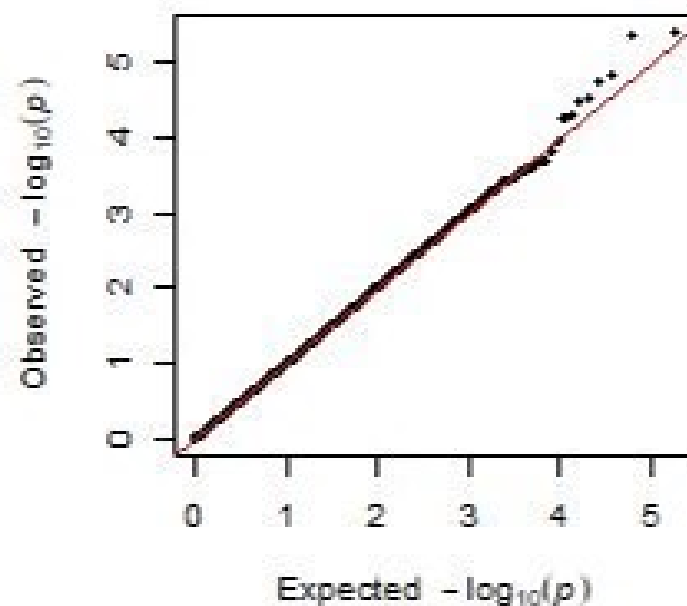

Accounting for kinship and structure

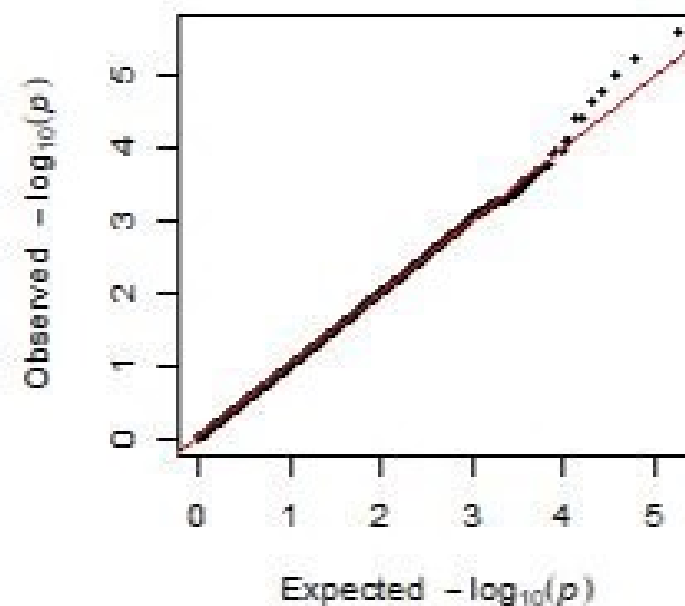

trait: resCH300h\_po16

No accounting for kinship or structure

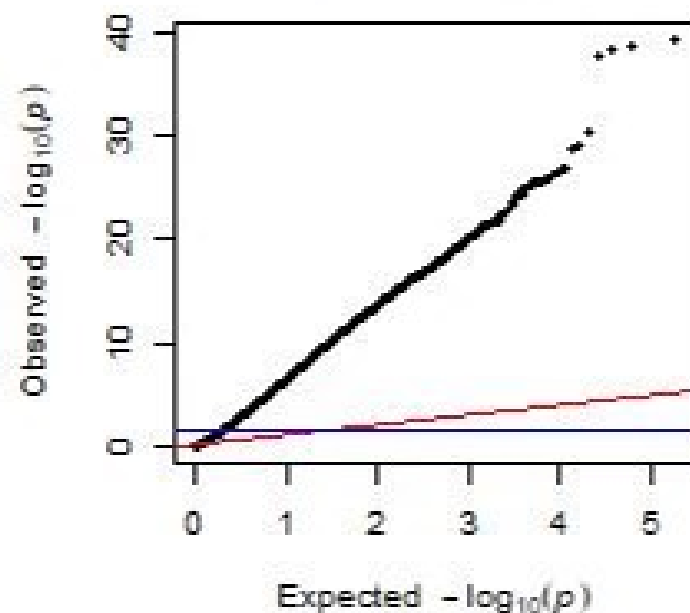

Accounting only for structure

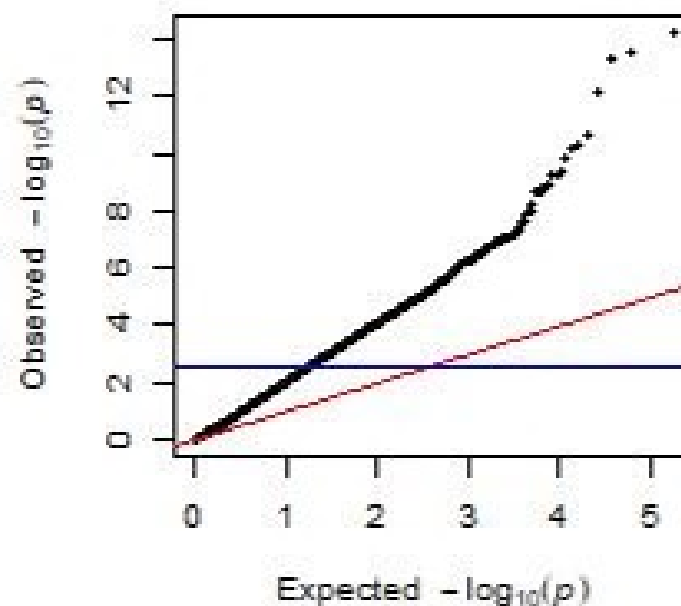

Accounting only for kinship

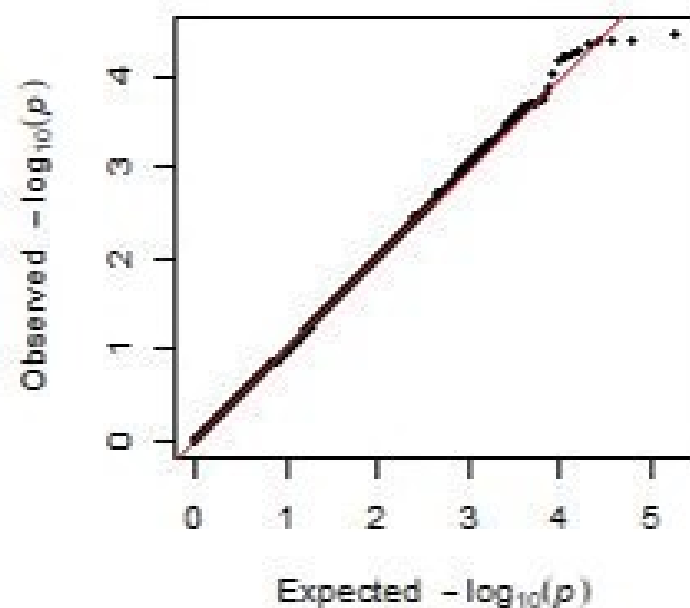

Accounting for kinship and structure

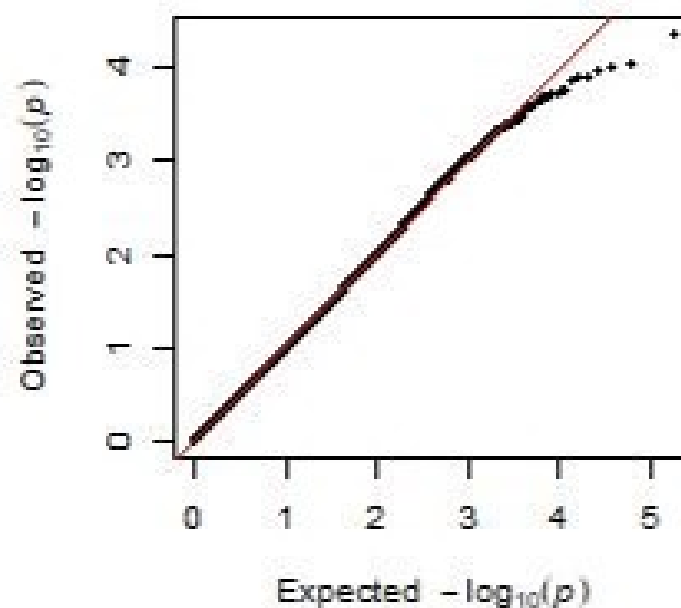

trait: resCH300h\_po17

No accounting for kinship or structure

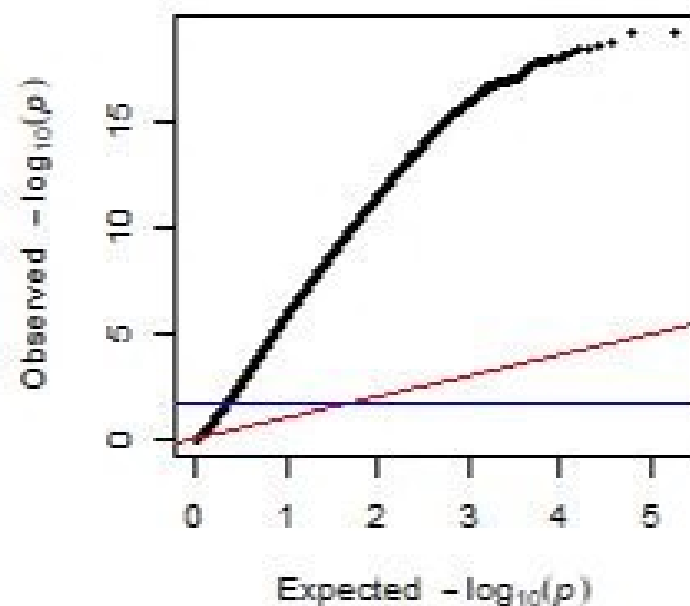

Accounting only for structure

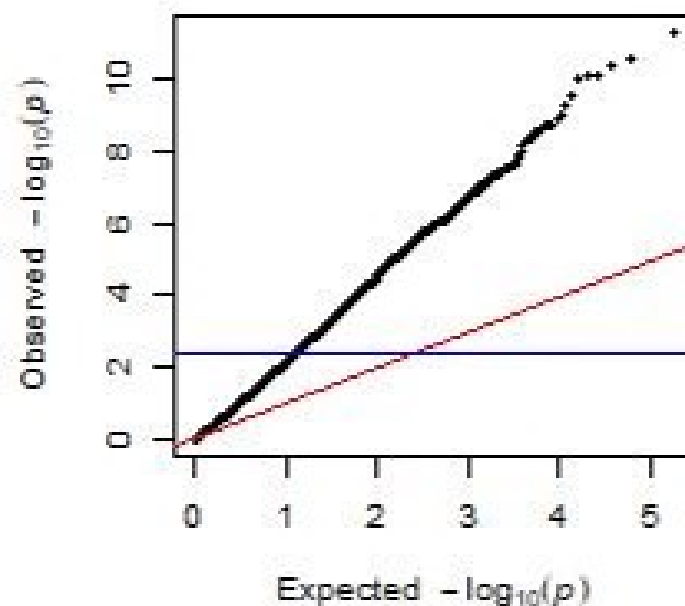

Accounting only for kinship

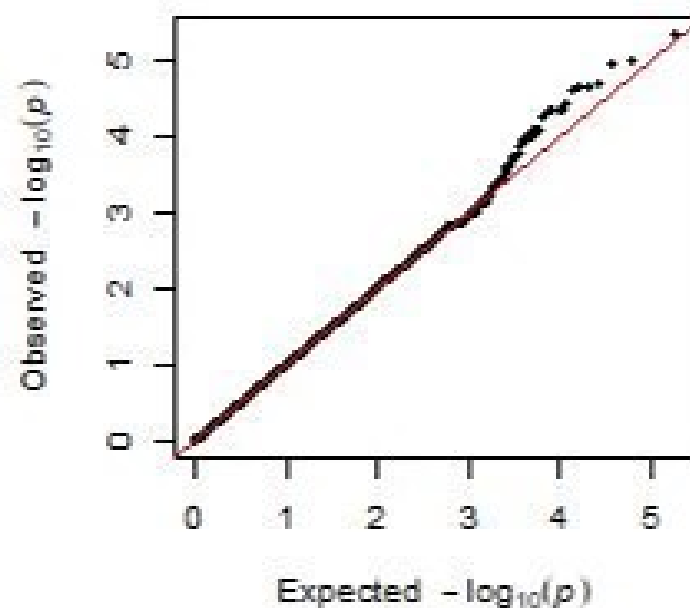

Accounting for kinship and structure

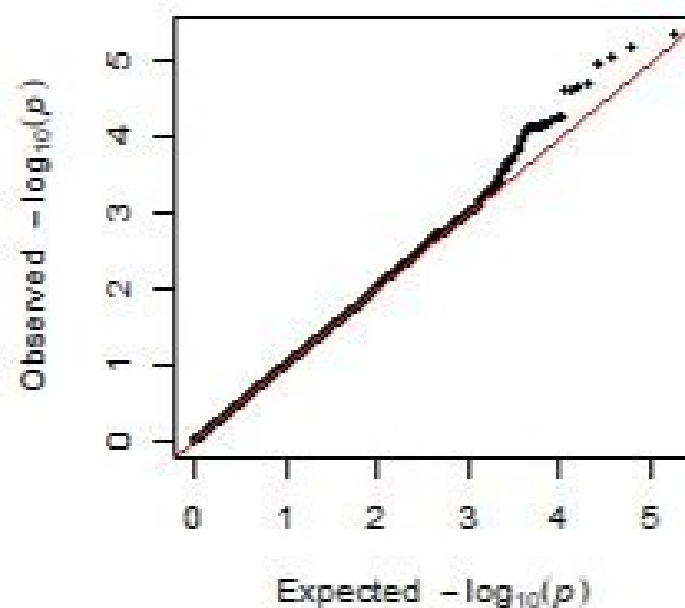

# trait: resCH400h\_lu16

No accounting for kinship or structure

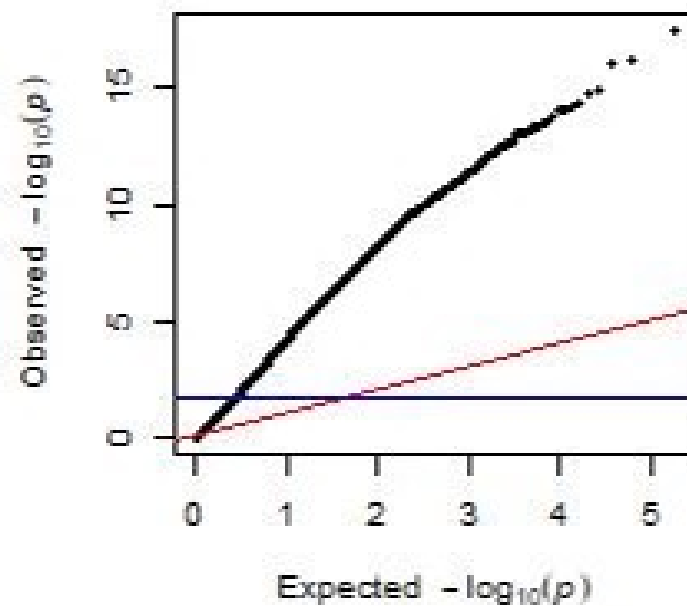

Accounting only for structure

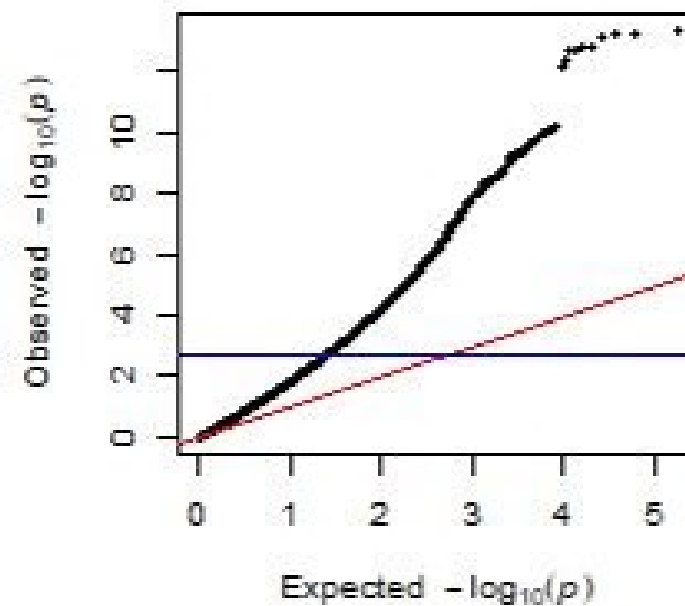

Accounting only for kinship

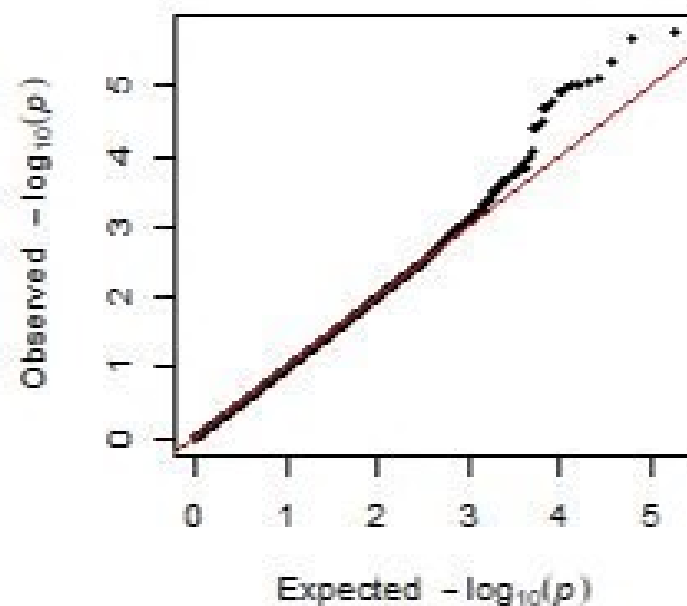

Accounting for kinship and structure

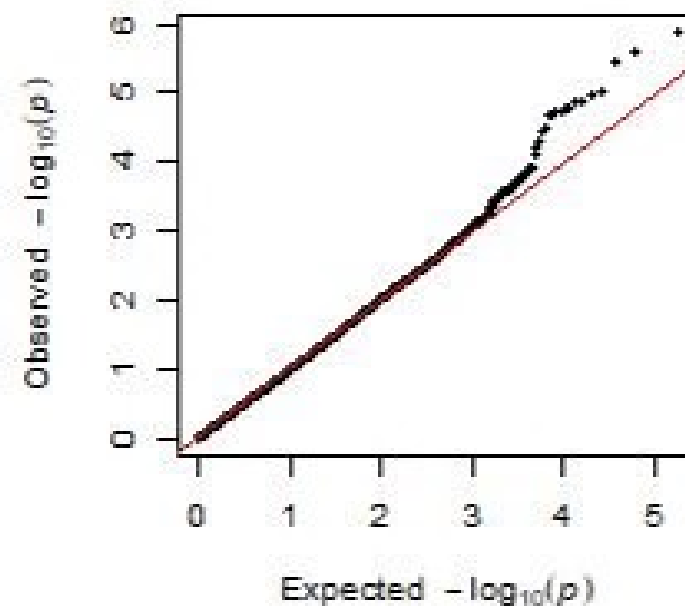



# trait: resCH400h\_lu17

No accounting for kinship or structure

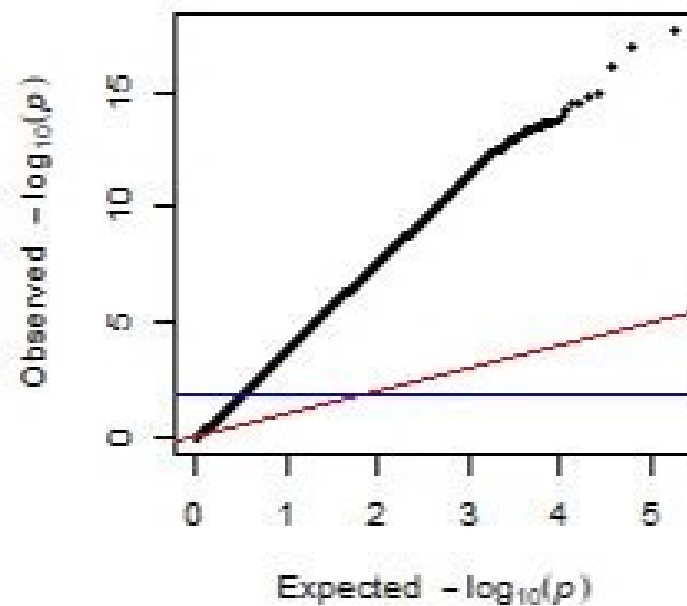

Accounting only for structure

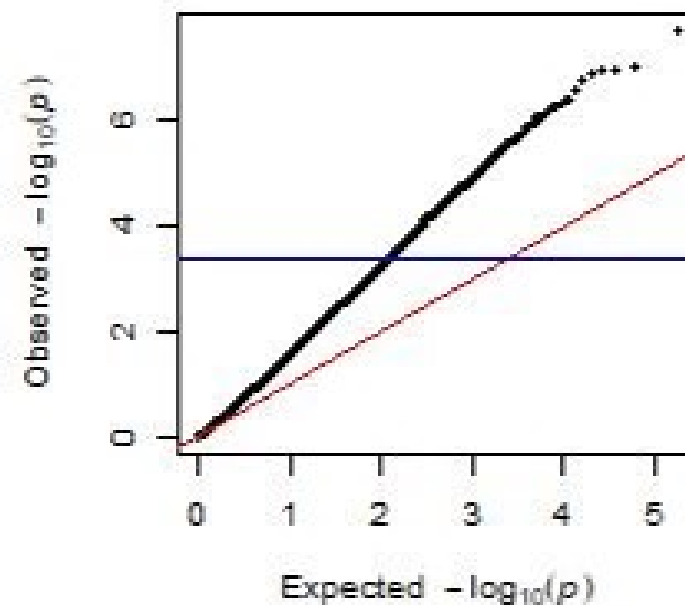

Accounting only for kinship

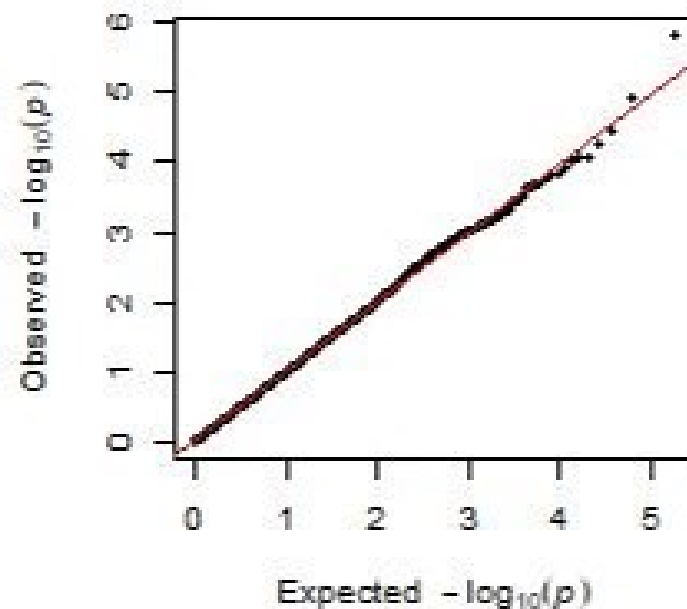

Accounting for kinship and structure

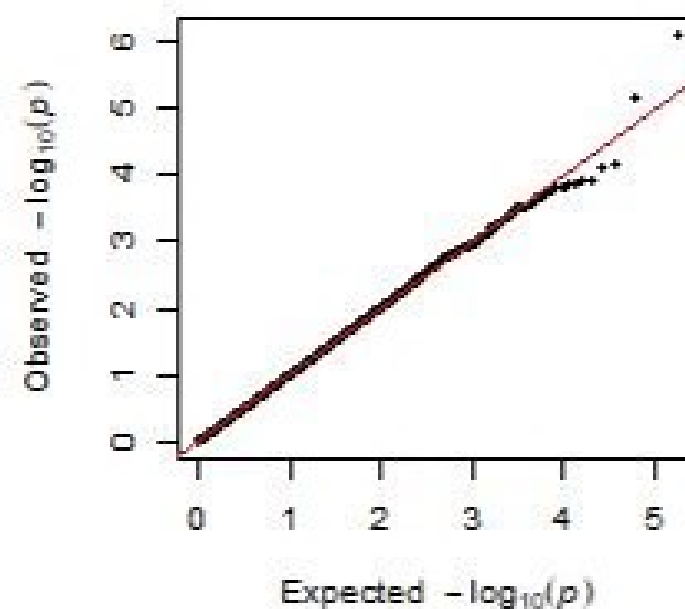

trait: resCH400h\_po16

No accounting for kinship or structure

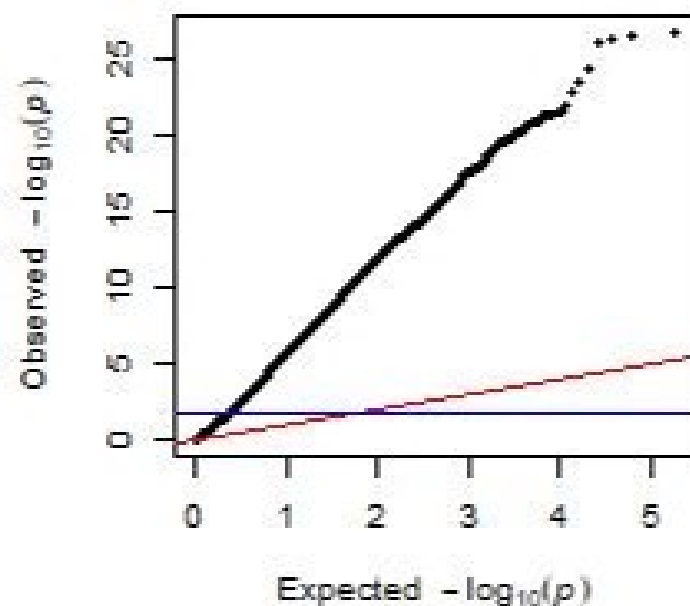

Accounting only for structure

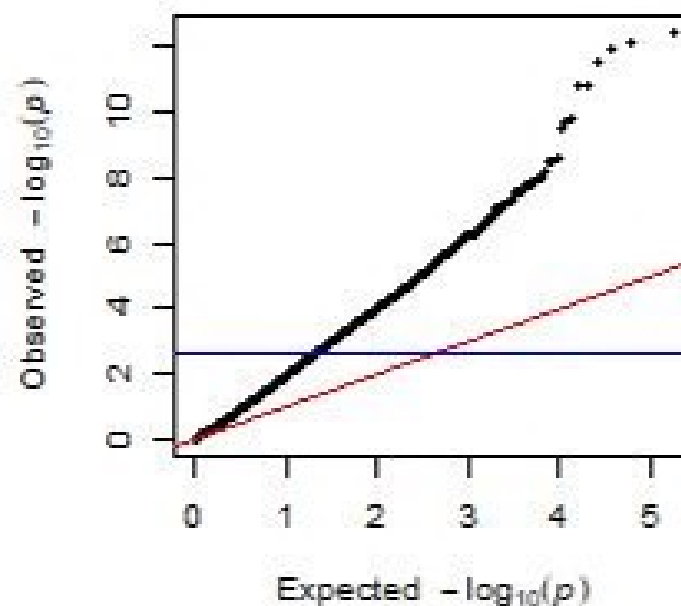

Accounting only for kinship

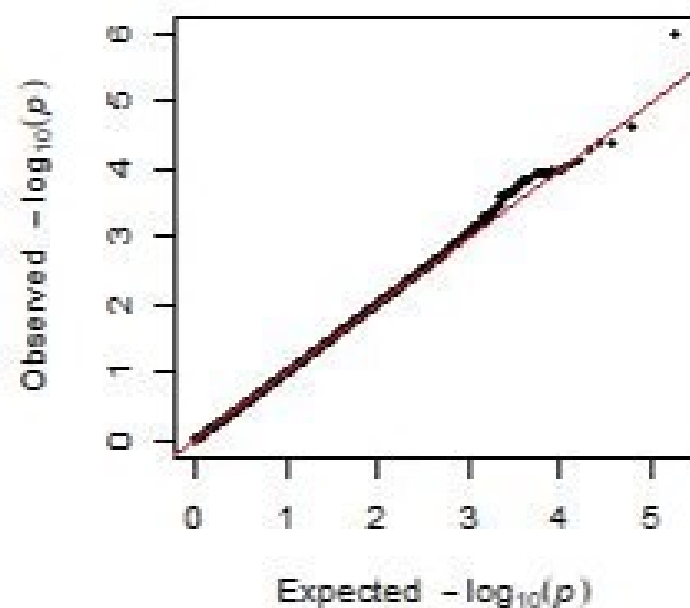

Accounting for kinship and structure

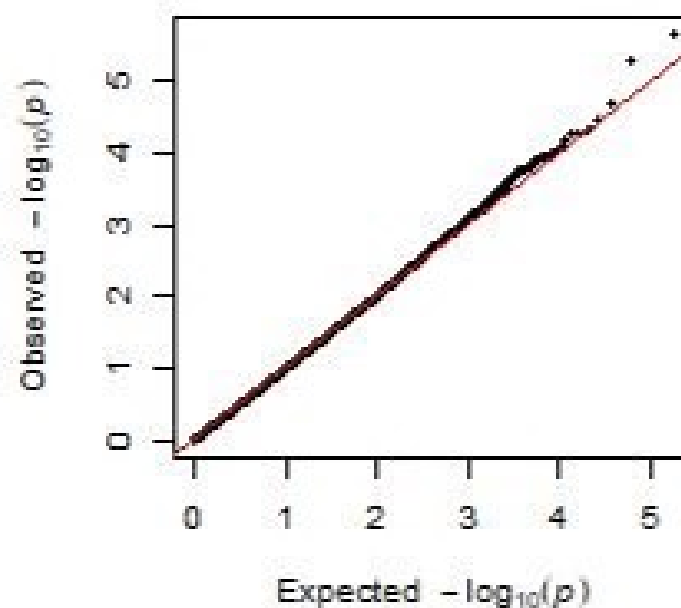

trait: resCH400h\_po17

No accounting for kinship or structure

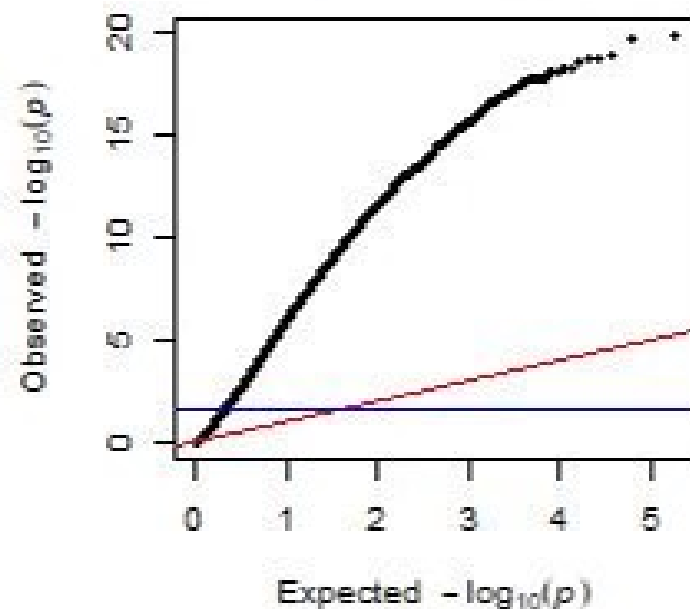

Accounting only for structure

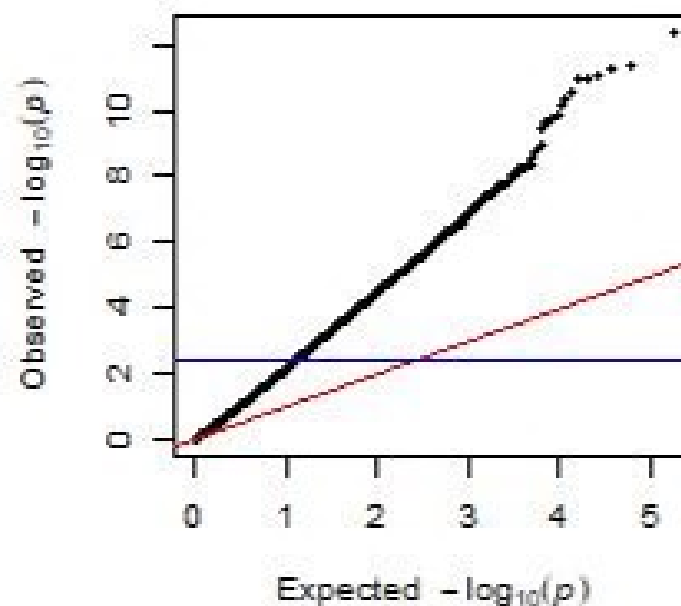

Accounting only for kinship

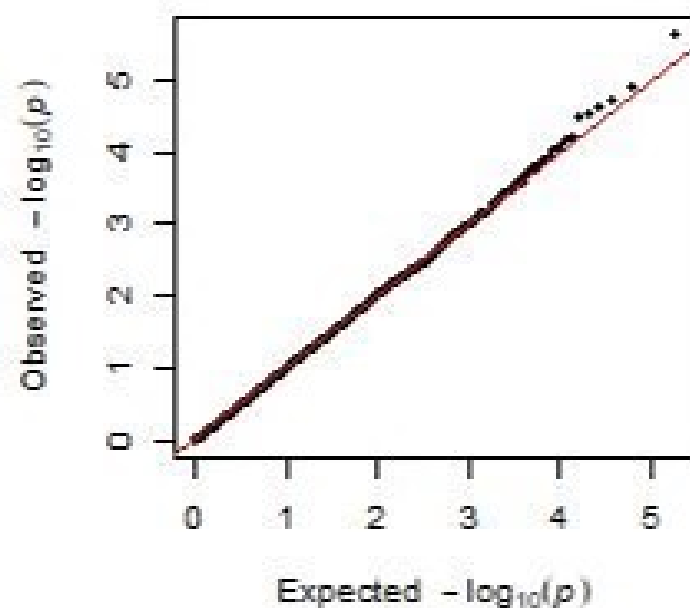

Accounting for kinship and structure

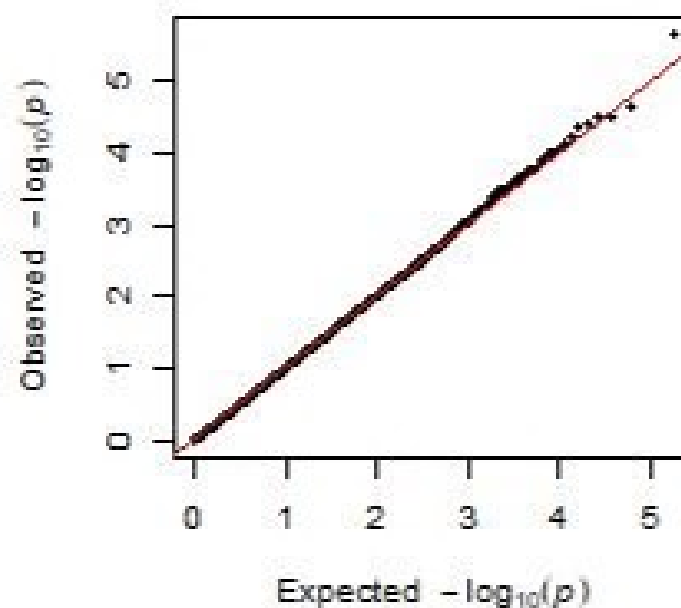

# trait: resCHs300\_lu16

No accounting for kinship or structure

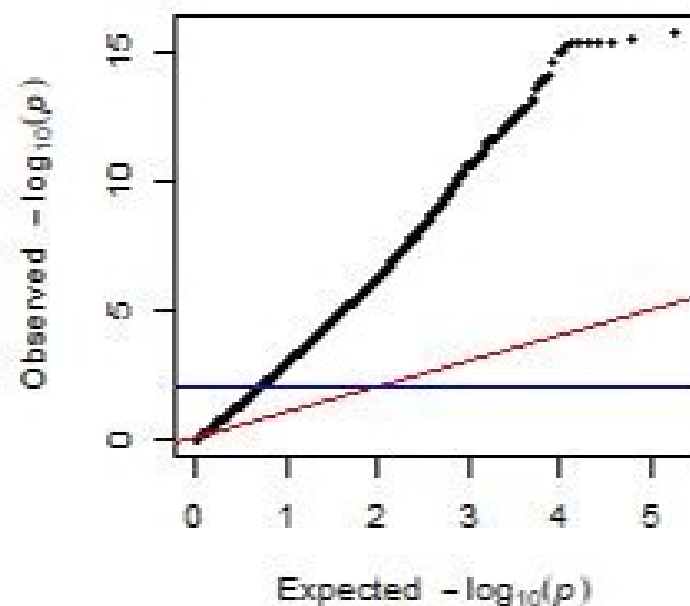

Accounting only for structure

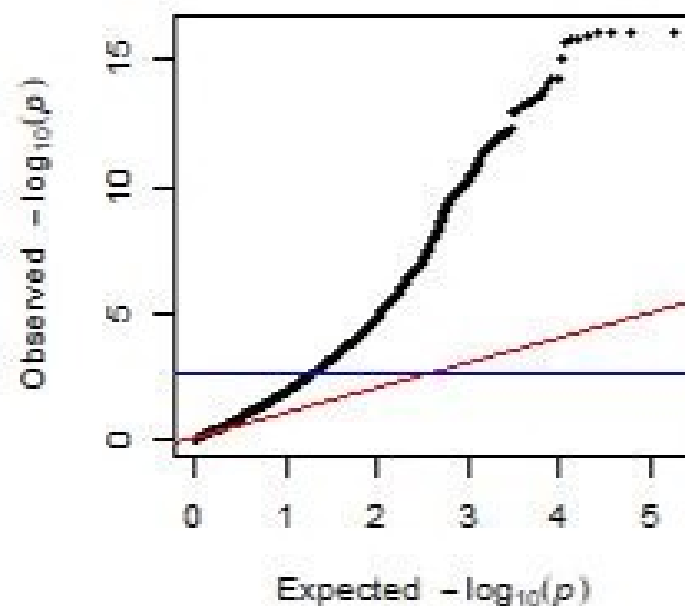

Accounting only for kinship

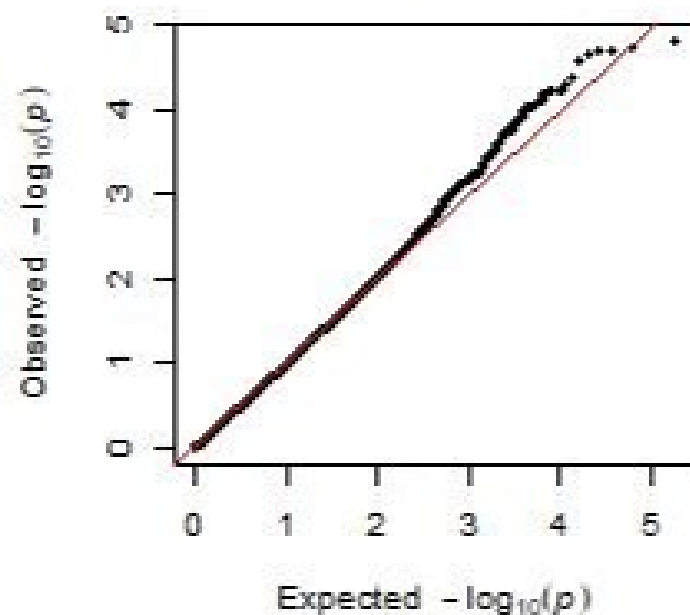

Accounting for kinship and structure

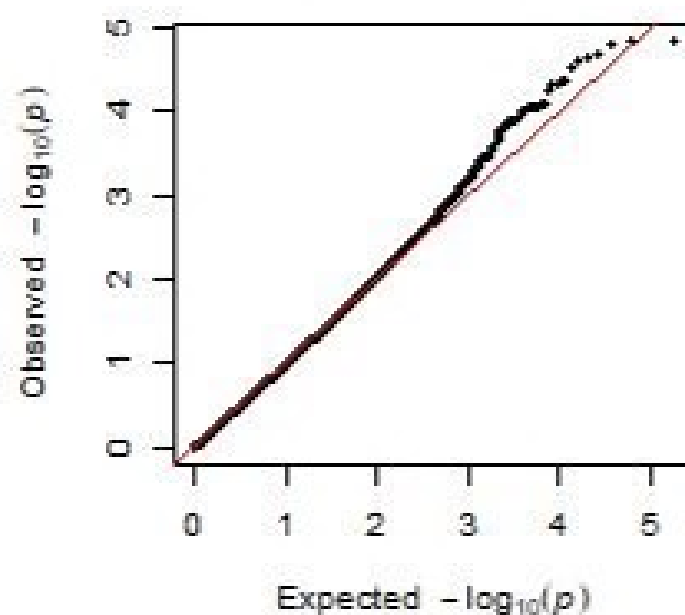

# trait: resCHs300\_lu17

No accounting for kinship or structure

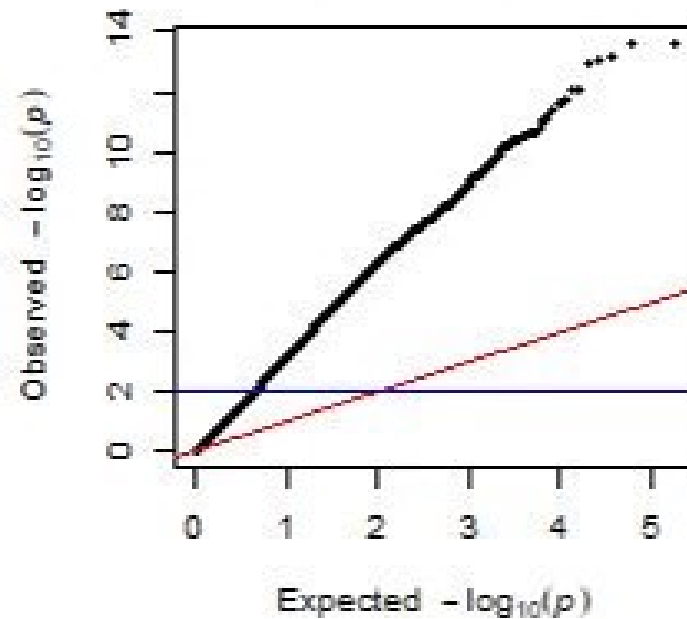

Accounting only for structure

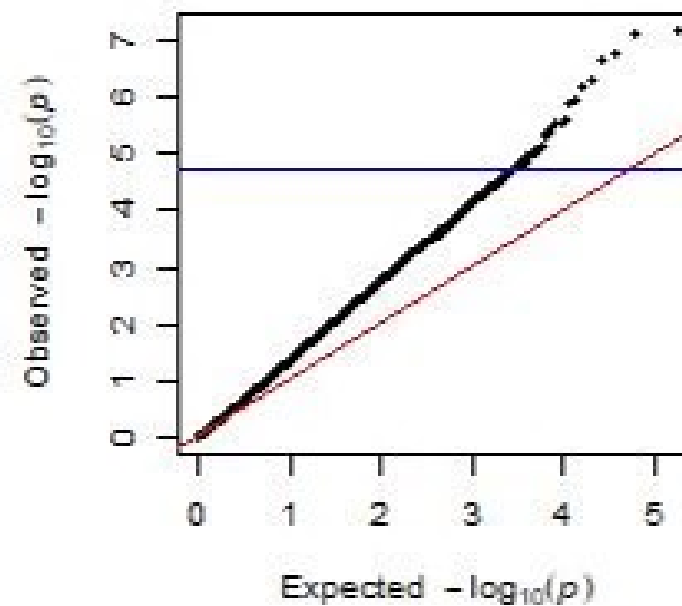

Accounting only for kinship

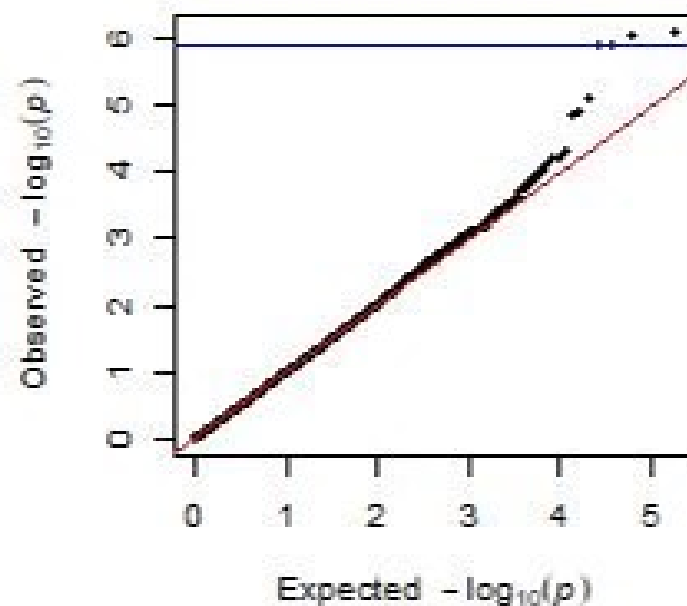

Accounting for kinship and structure

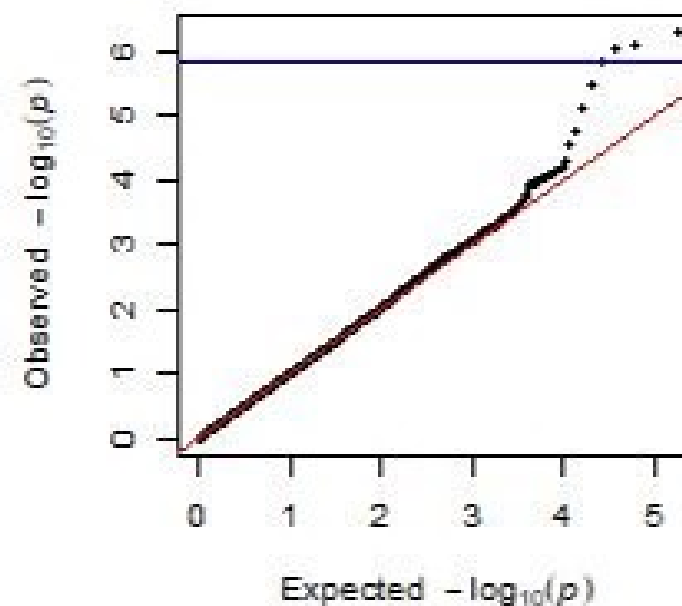

# trait: resCHs300\_me16

No accounting for kinship or structure

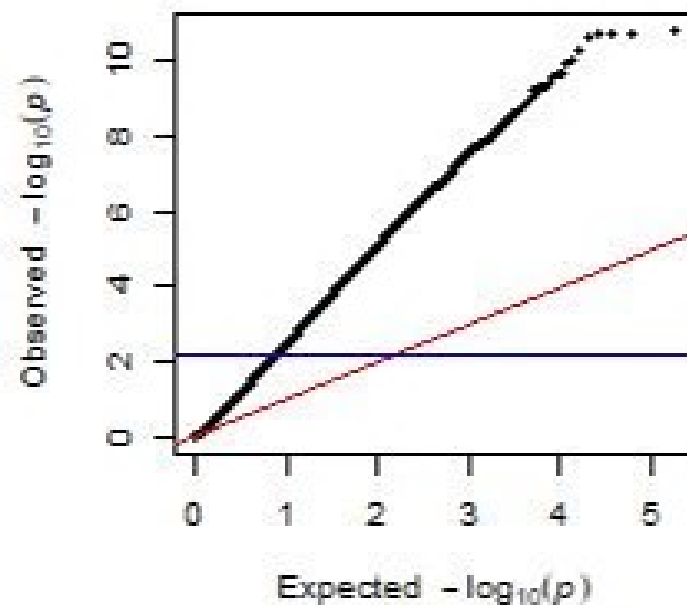

Accounting only for structure

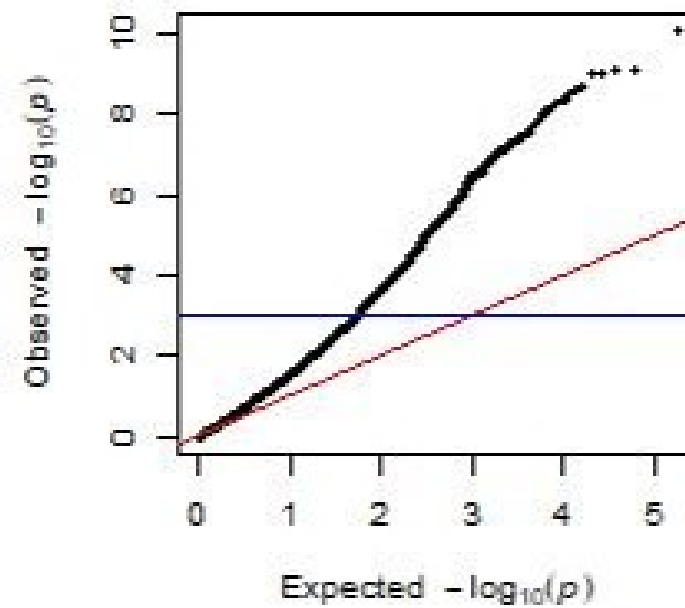

Accounting only for kinship

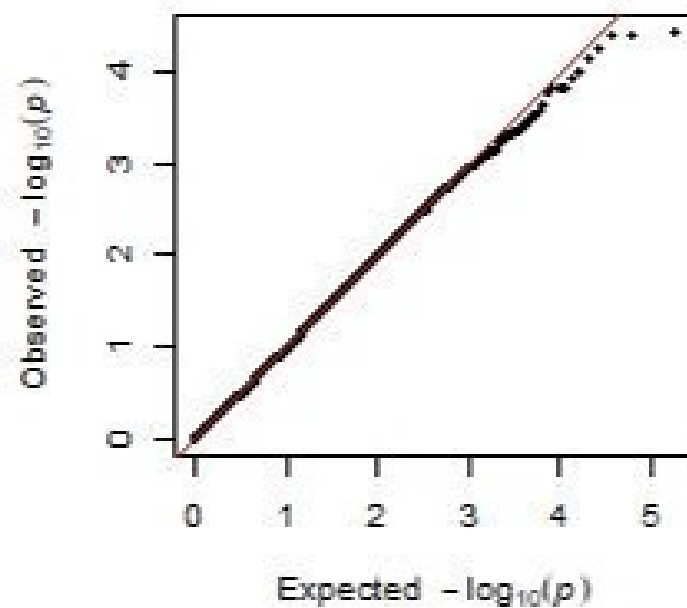

Accounting for kinship and structure

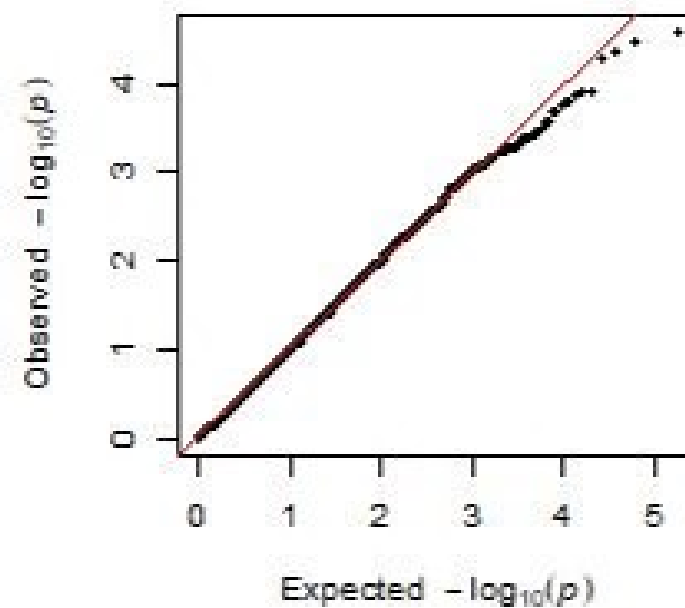

# trait: resCHs300\_me17

No accounting for kinship or structure

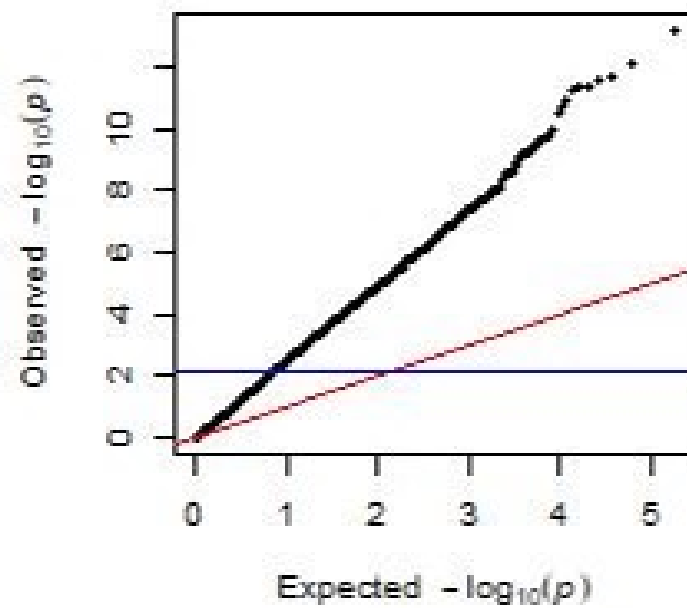

Accounting only for structure

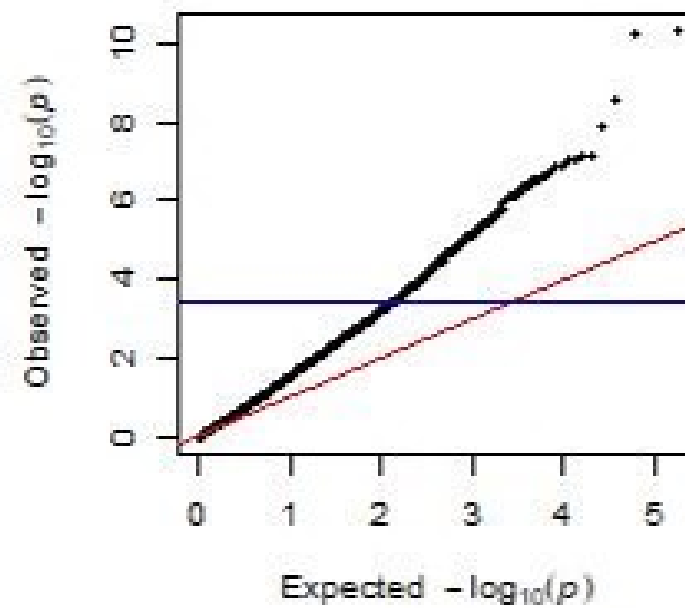

Accounting only for kinship

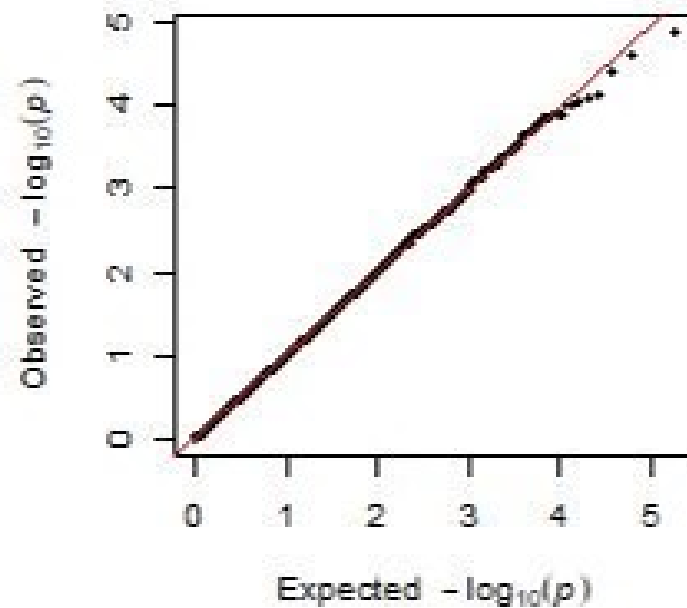

Accounting for kinship and structure

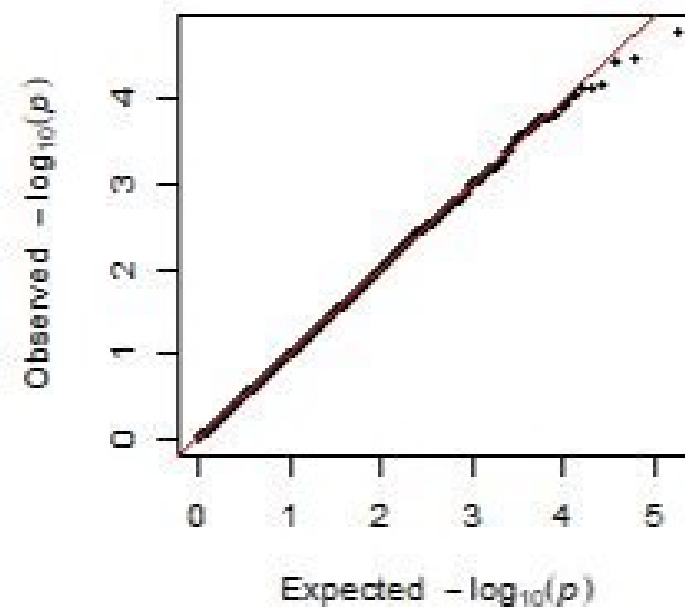

# trait: resCHs300\_po16

No accounting for kinship or structure

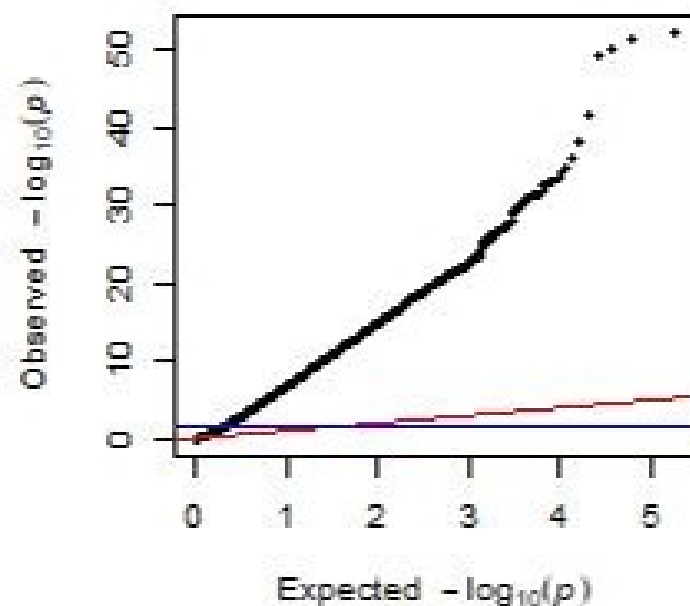

Accounting only for structure

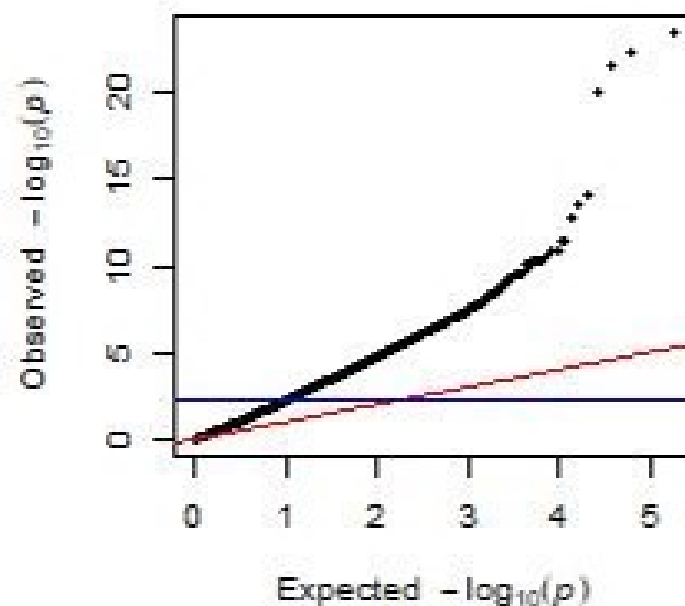

Accounting only for kinship

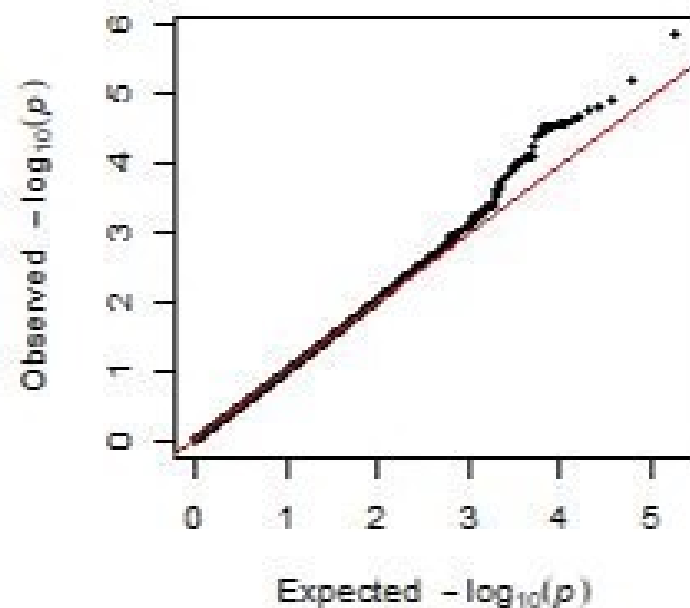

Accounting for kinship and structure

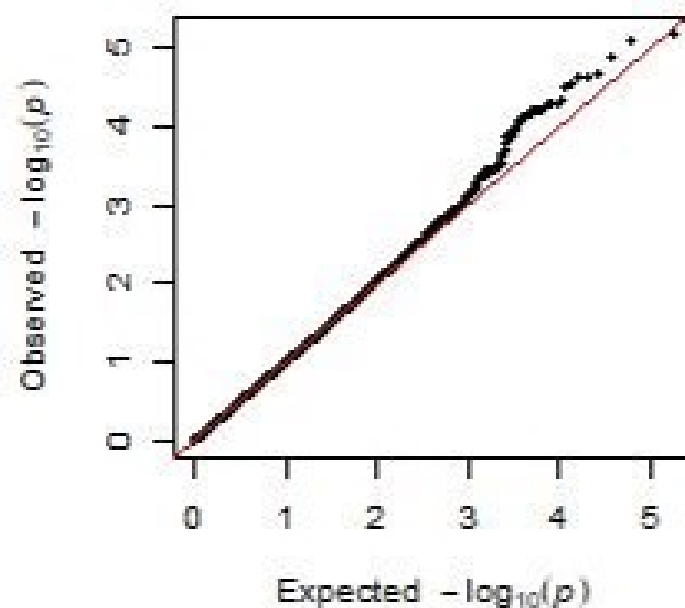



# trait: resCHs300\_po17

No accounting for kinship or structure

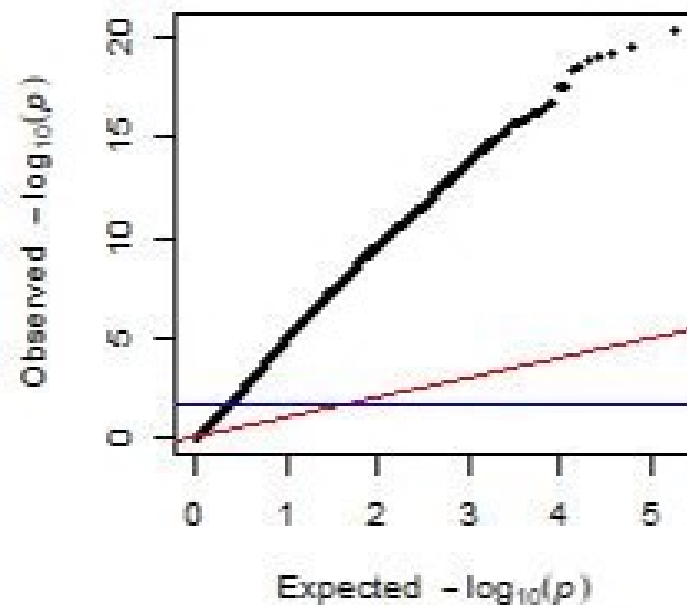

Accounting only for structure

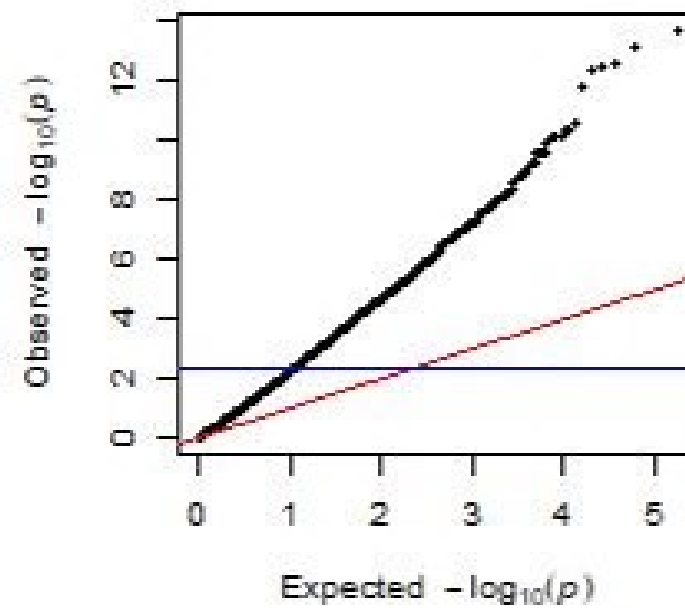

Accounting only for kinship

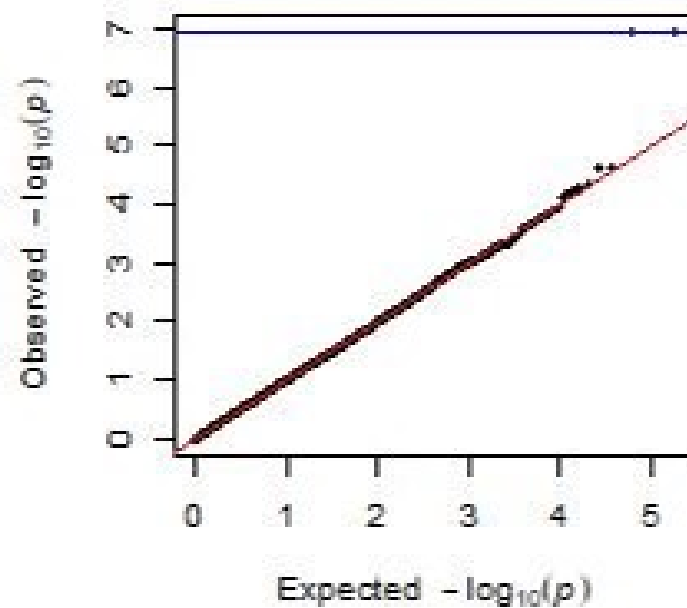

Accounting for kinship and structure

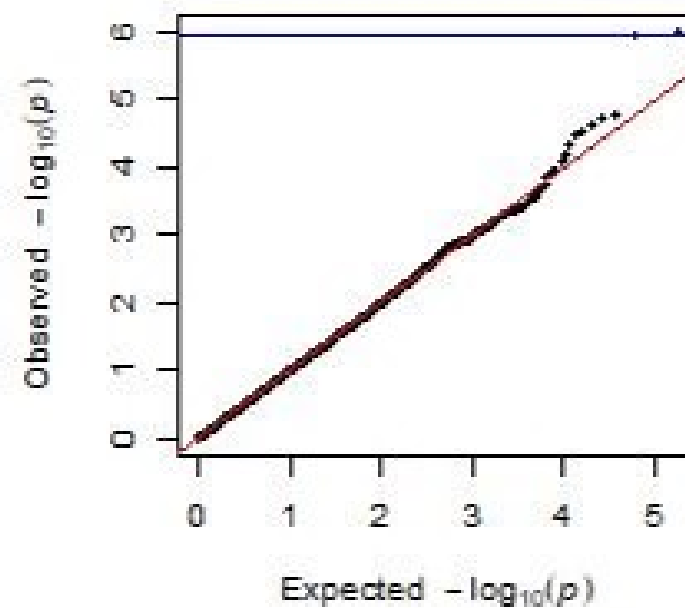

# trait: resCHs500\_lu16

No accounting for kinship or structure

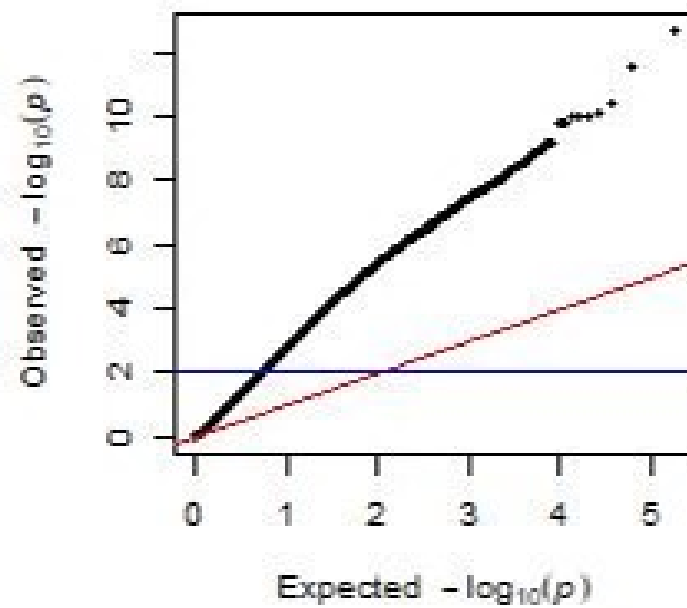

Accounting only for structure

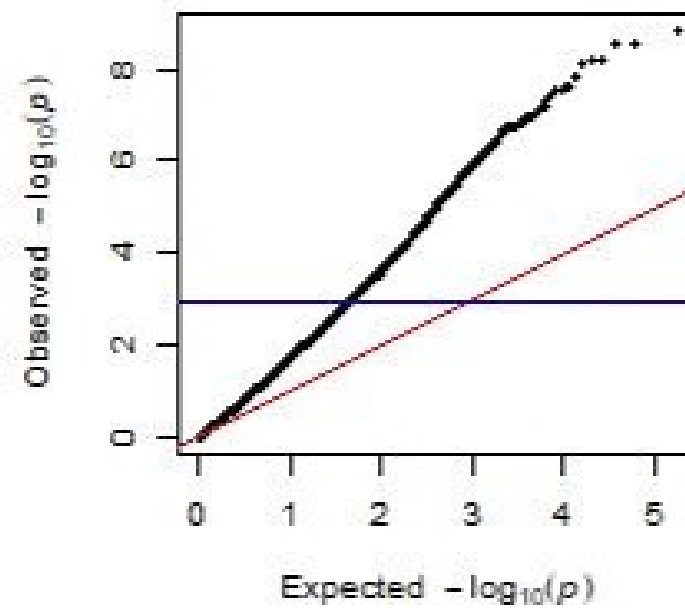

Accounting only for kinship

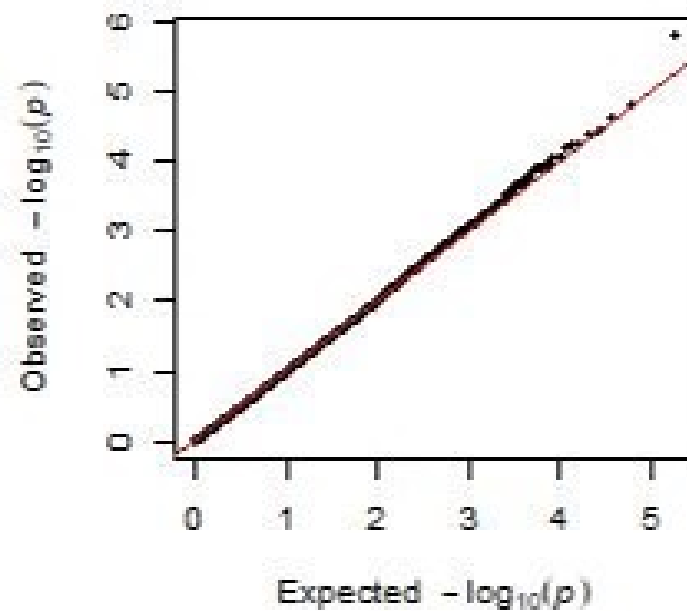

Accounting for kinship and structure

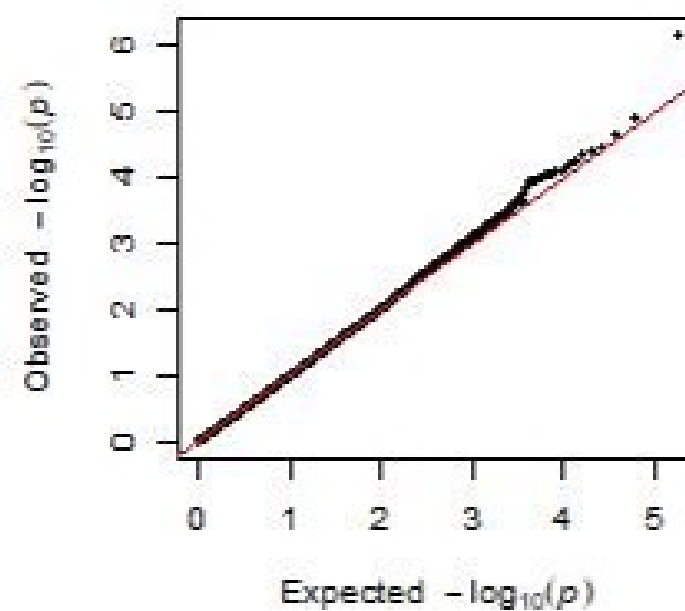

# trait: resCHs500\_lu17

No accounting for kinship or structure

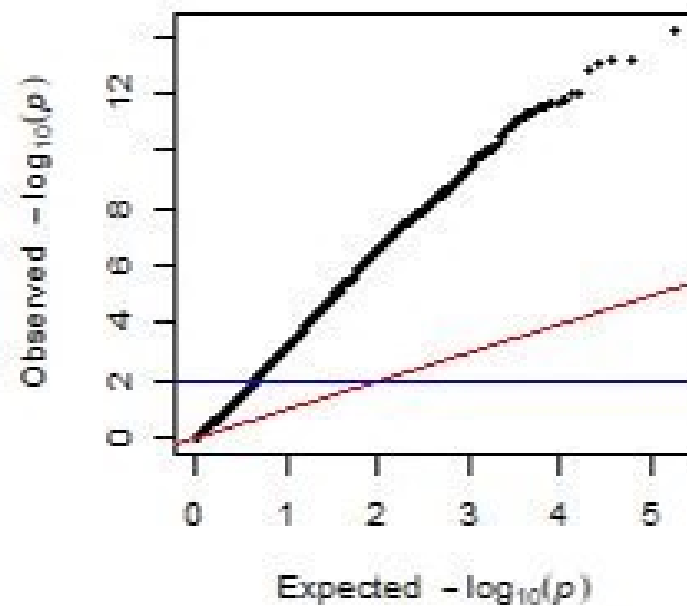

Accounting only for structure

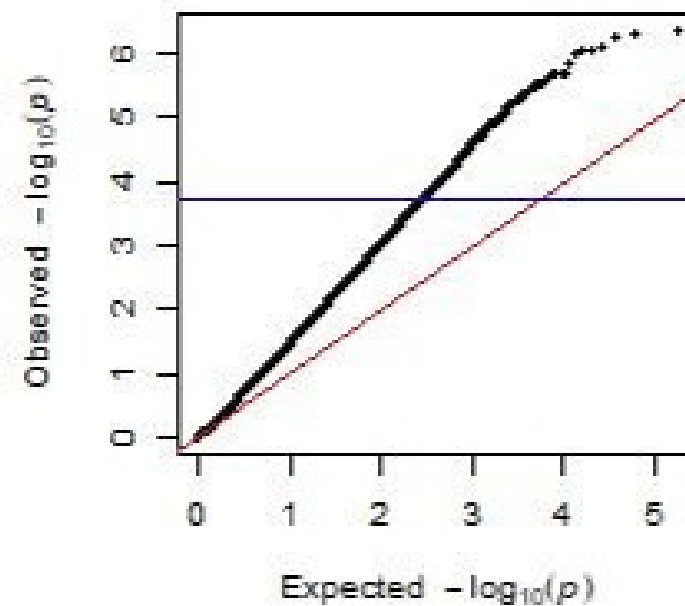

Accounting only for kinship

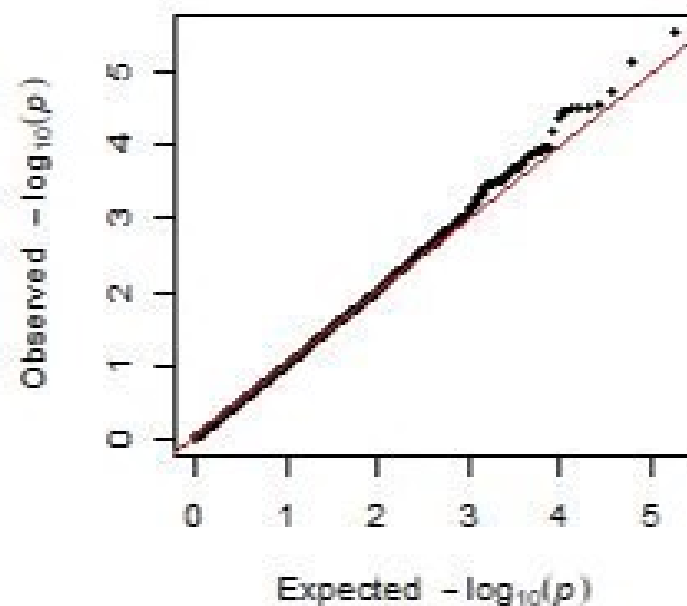

Accounting for kinship and structure

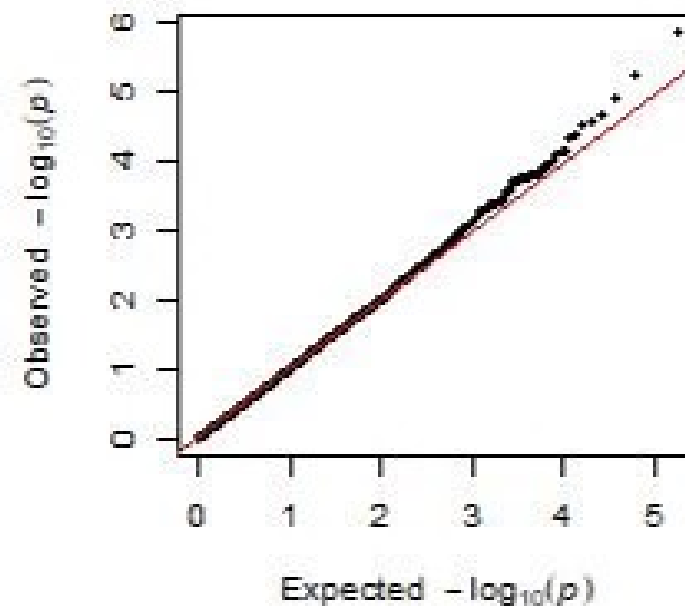

# trait: resCHs500\_me16

No accounting for kinship or structure

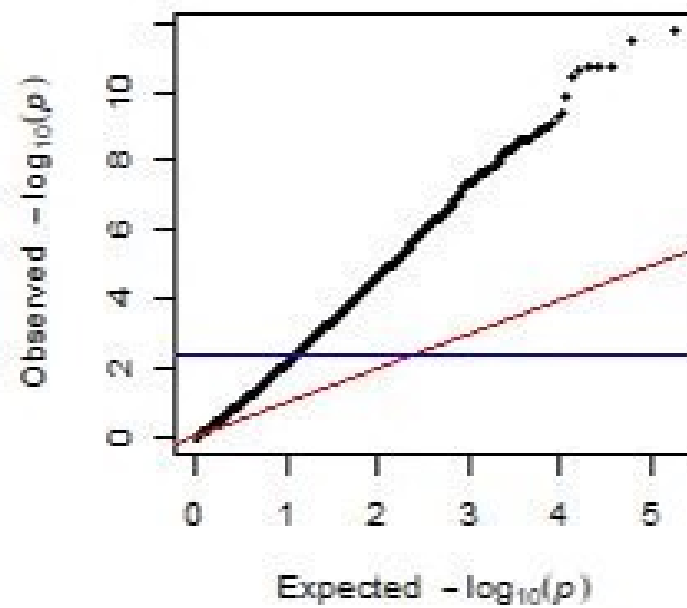

Accounting only for structure

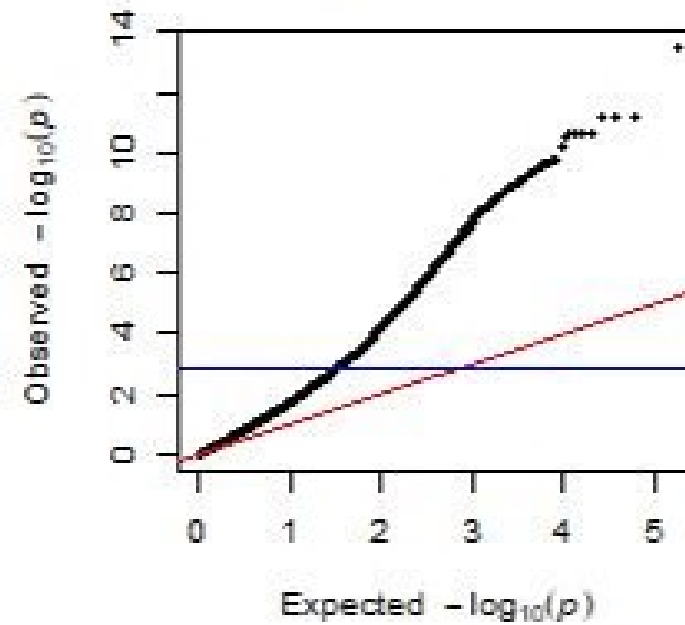

Accounting only for kinship

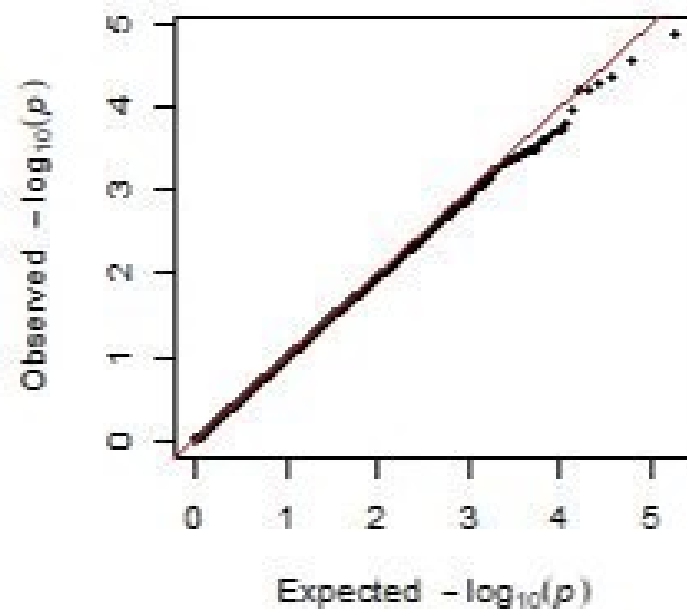

Accounting for kinship and structure

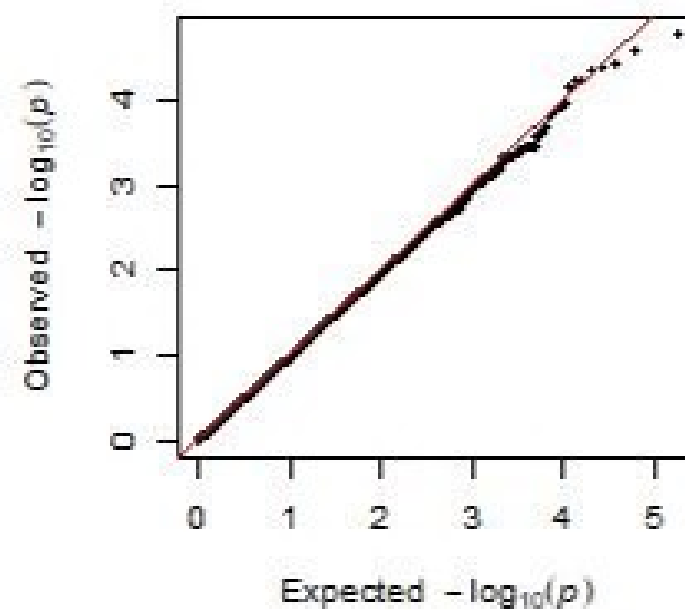

# trait: resCHs500\_me17

No accounting for kinship or structure

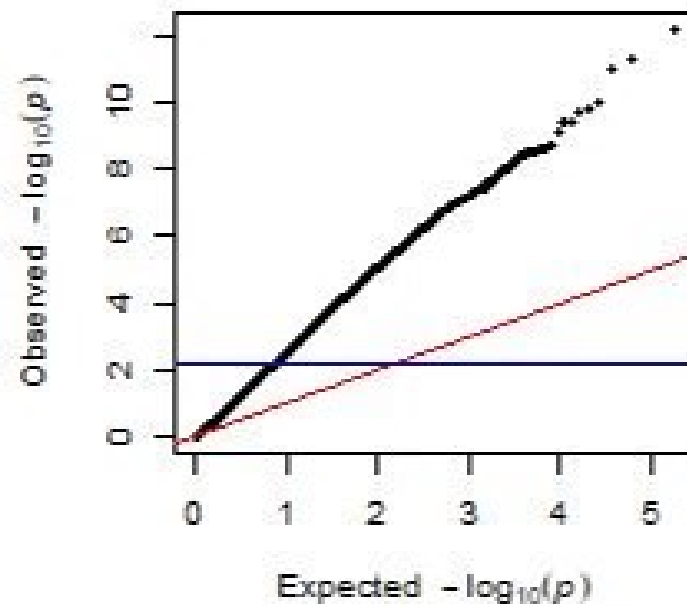

Accounting only for structure

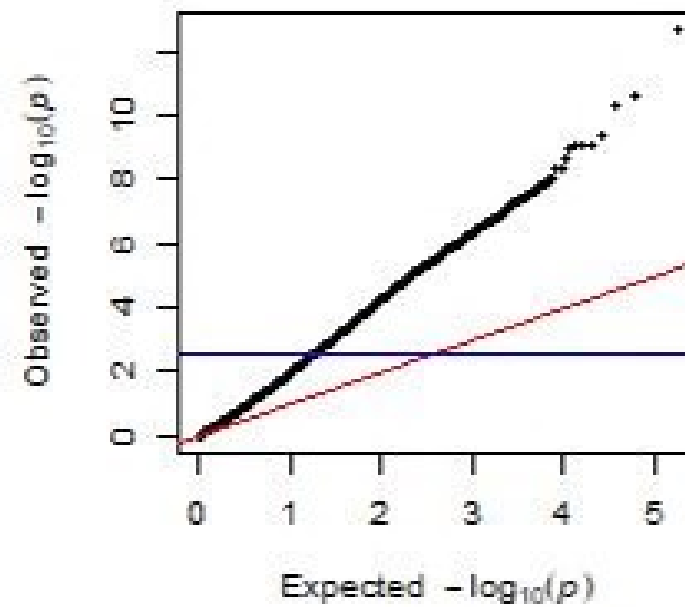

Accounting only for kinship

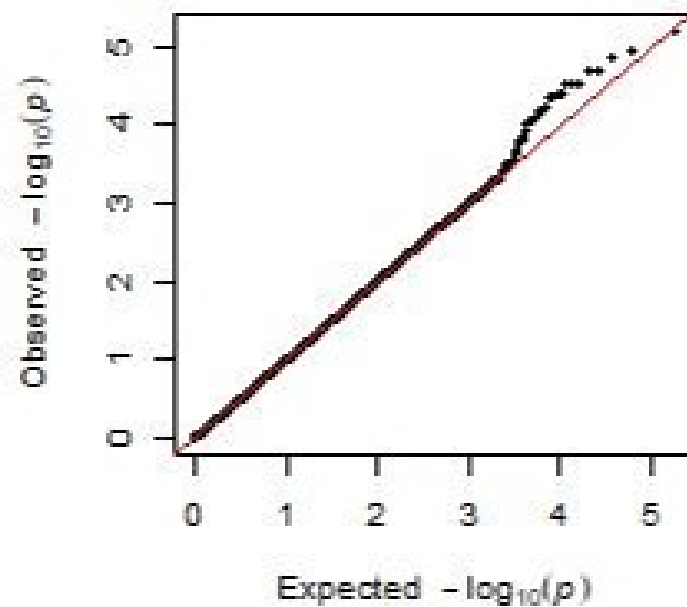

Accounting for kinship and structure

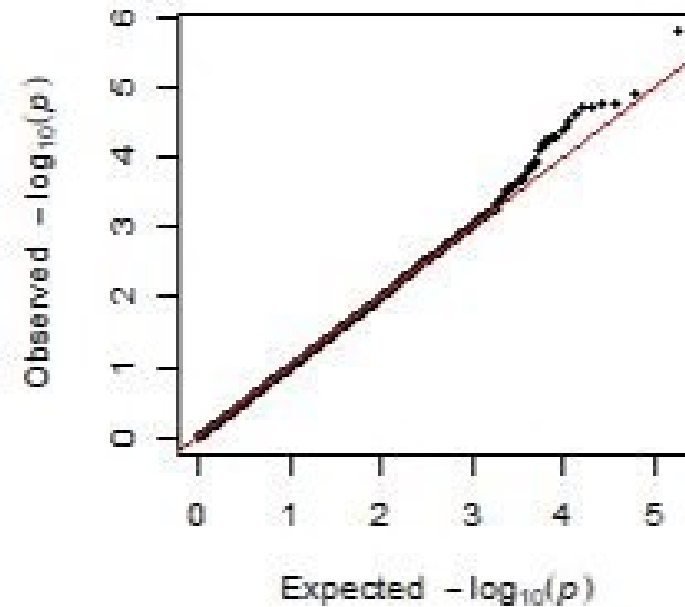

# trait: resCHs500\_po17

No accounting for kinship or structure

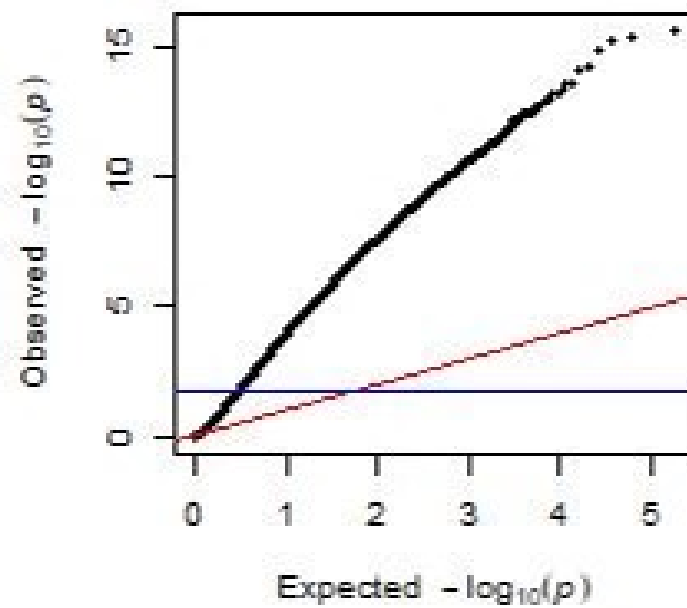

Accounting only for structure

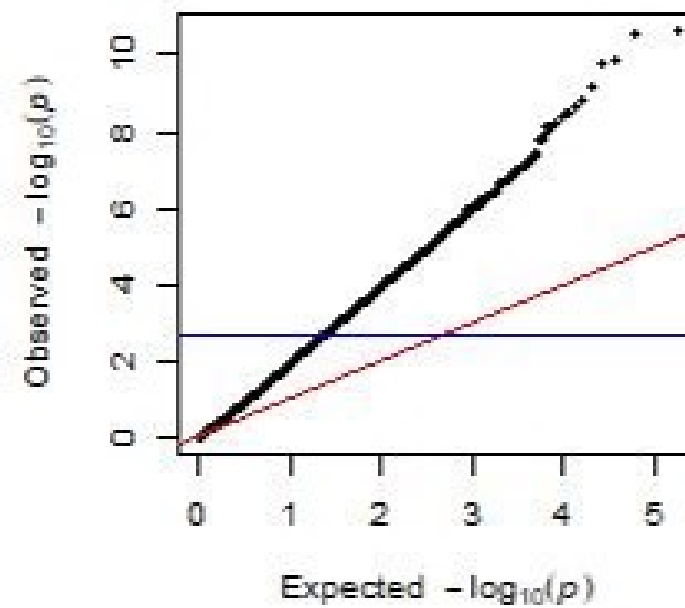

Accounting only for kinship

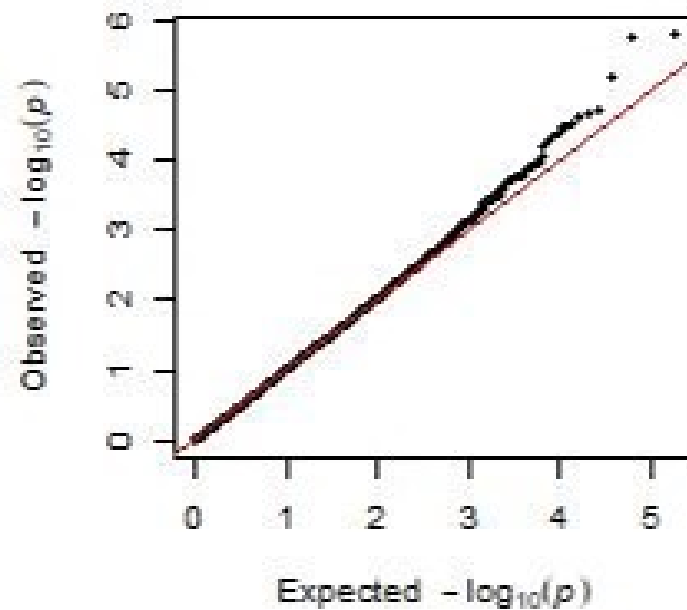

Accounting for kinship and structure

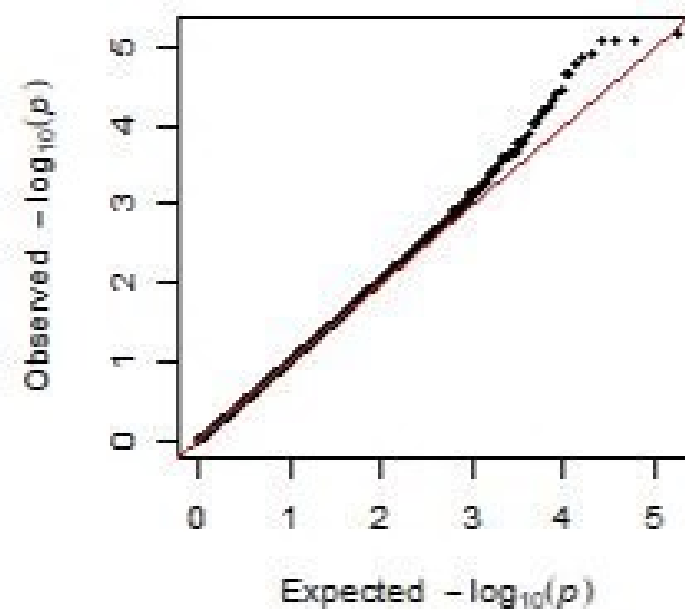

# trait: resDST\_lu17

No accounting for kinship or structure

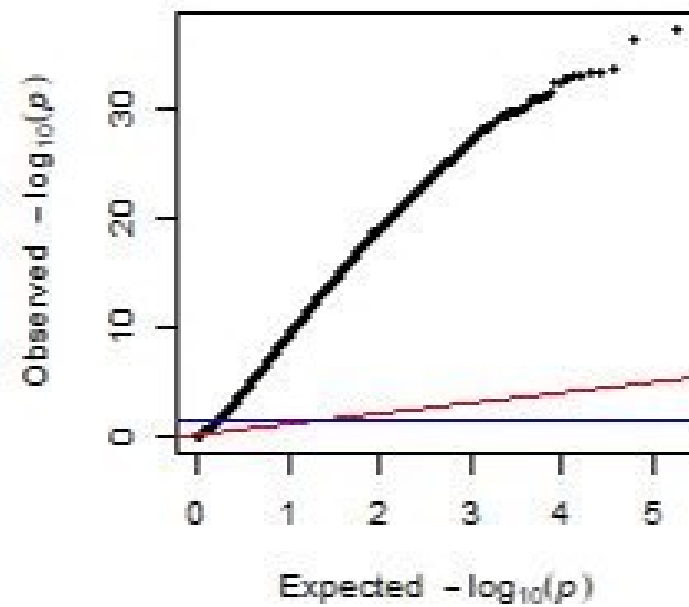

Accounting only for structure

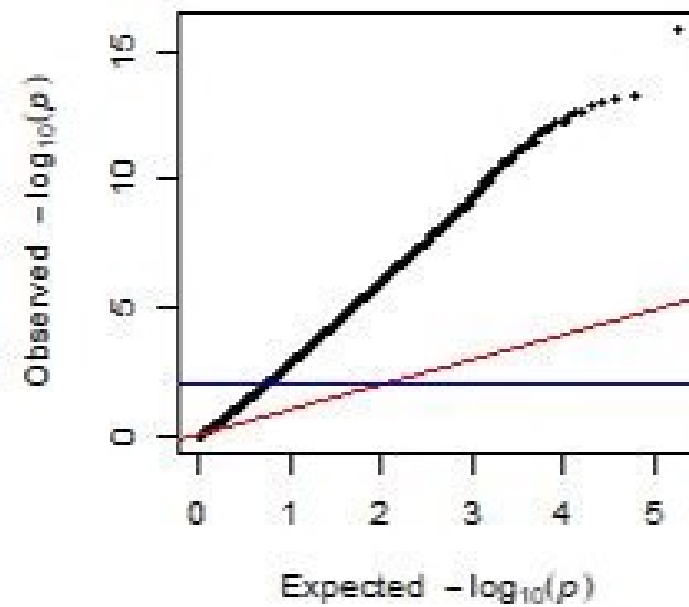

Accounting only for kinship

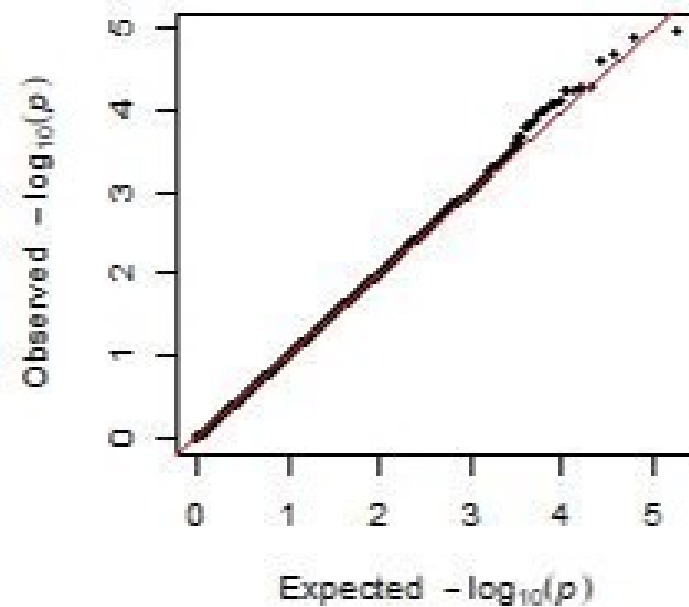

Accounting for kinship and structure

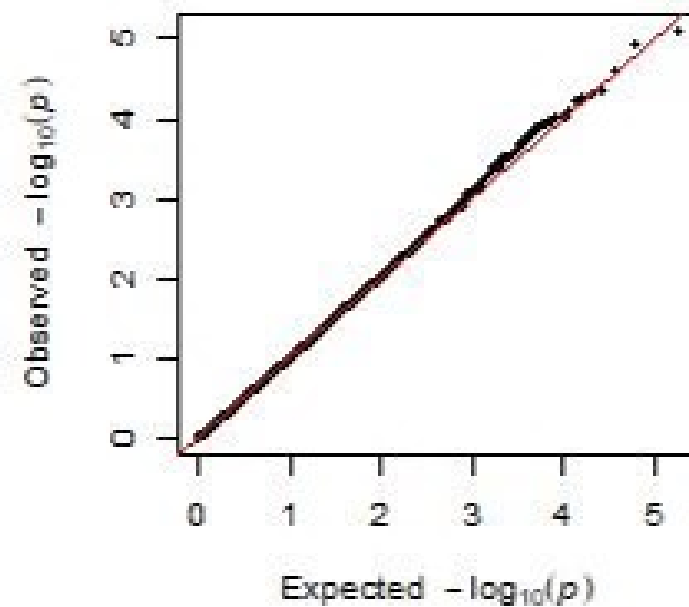

# trait: SCD\_15to17\_po

No accounting for kinship or structure

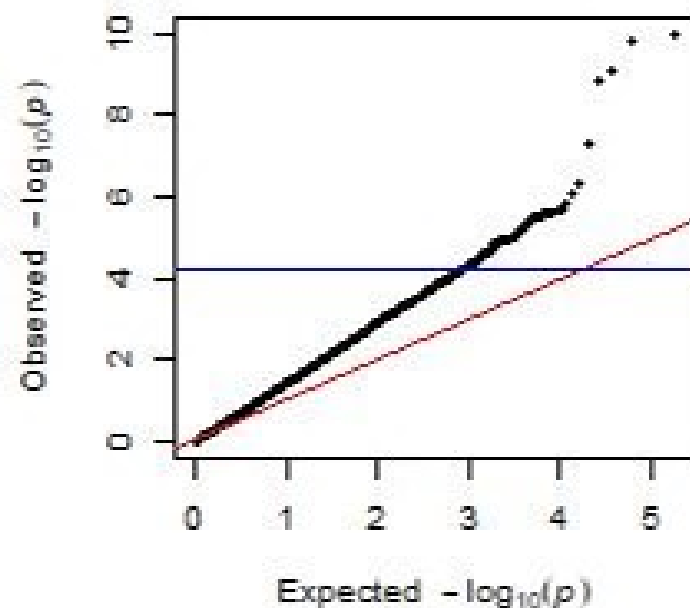

Accounting only for structure

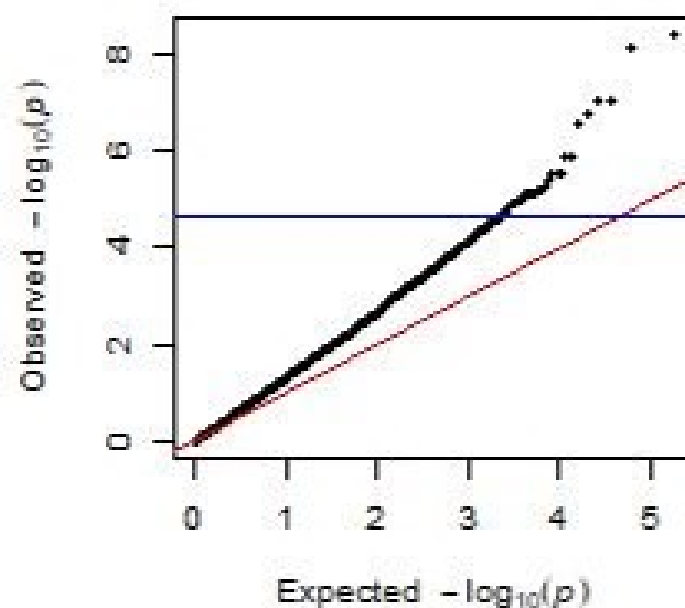

Accounting only for kinship

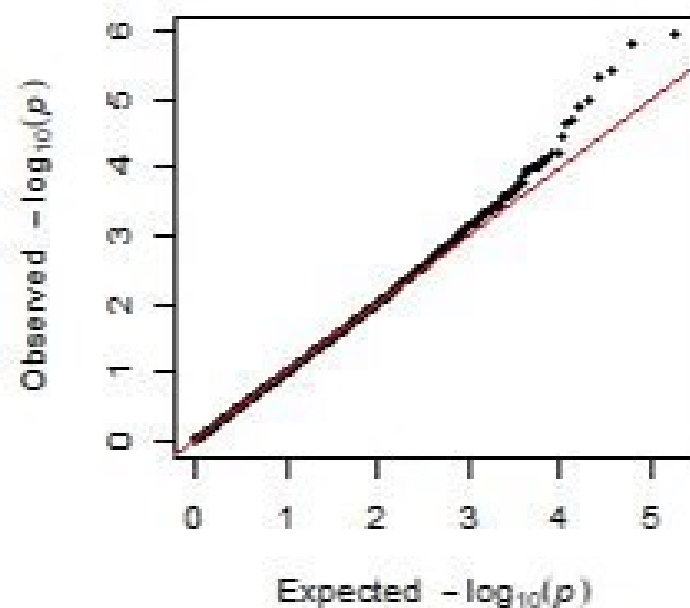

Accounting for kinship and structure

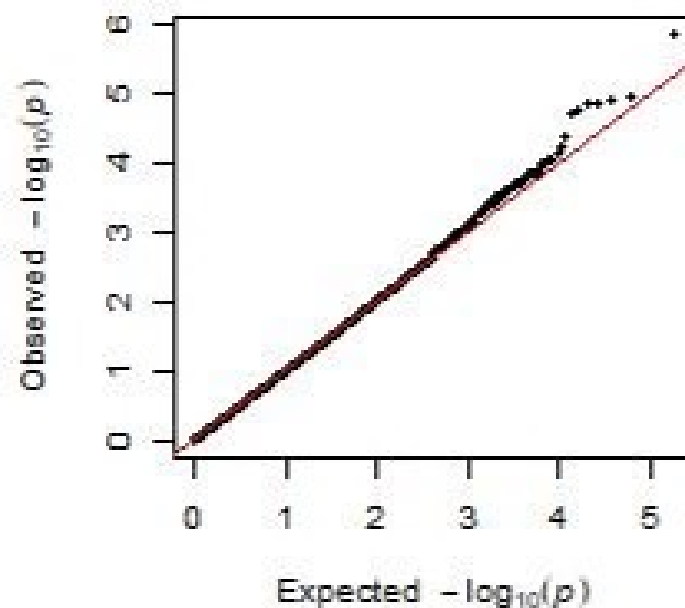



# trait: SCD\_15to18\_lu

No accounting for kinship or structure

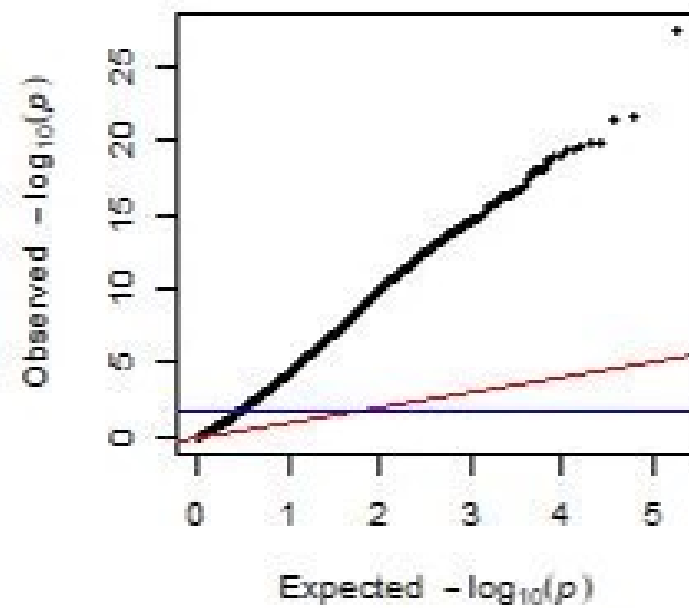

Accounting only for structure

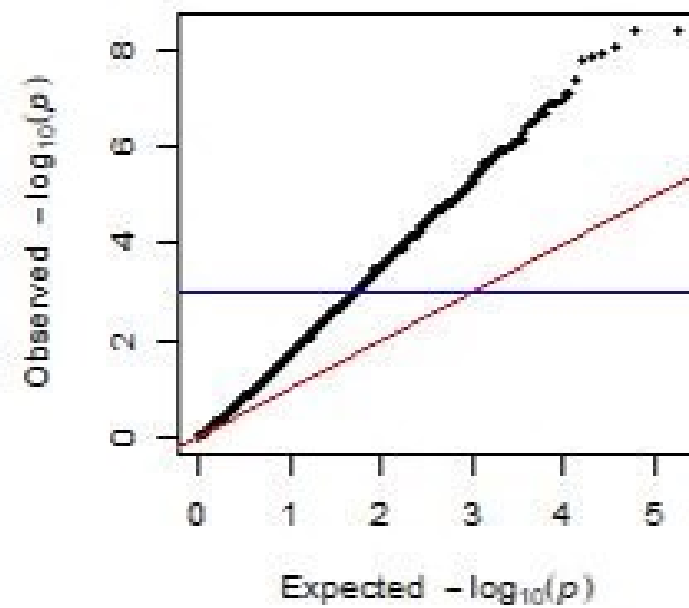

Accounting only for kinship

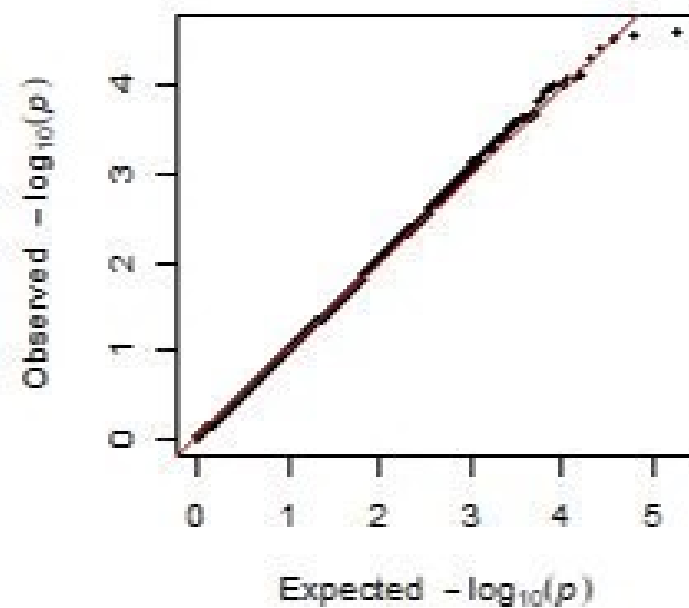

Accounting for kinship and structure

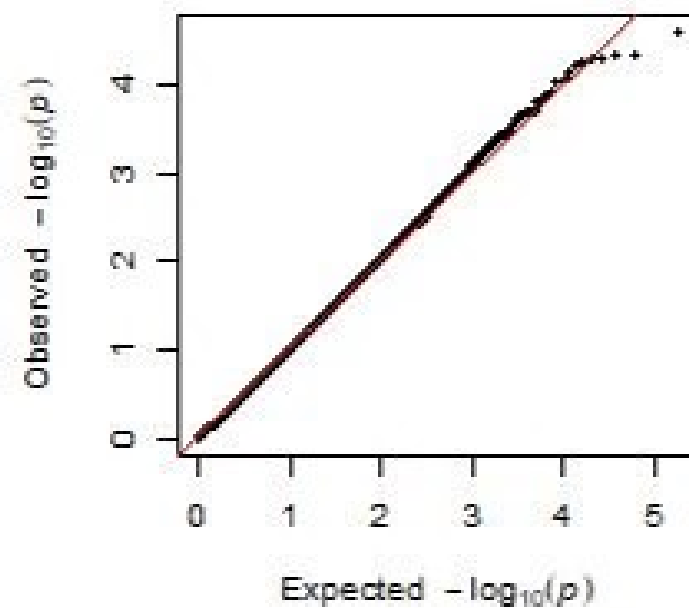

# trait: SCD\_16to17\_me

No accounting for kinship or structure

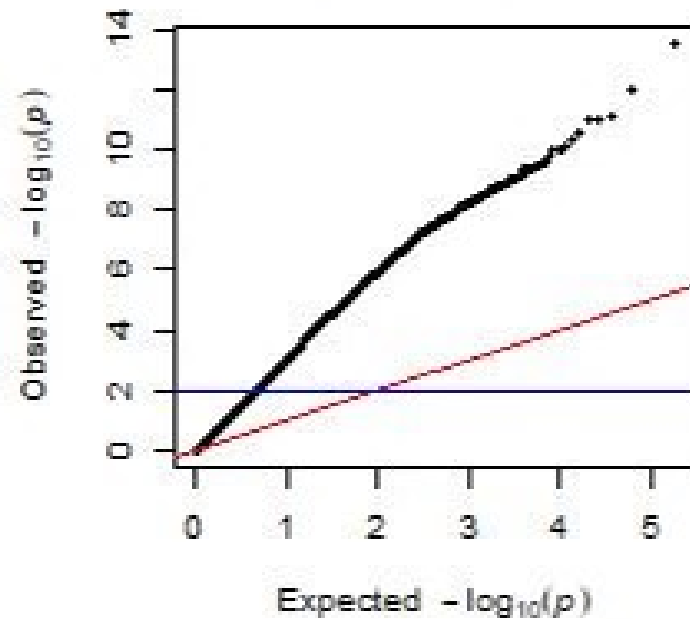

Accounting only for structure

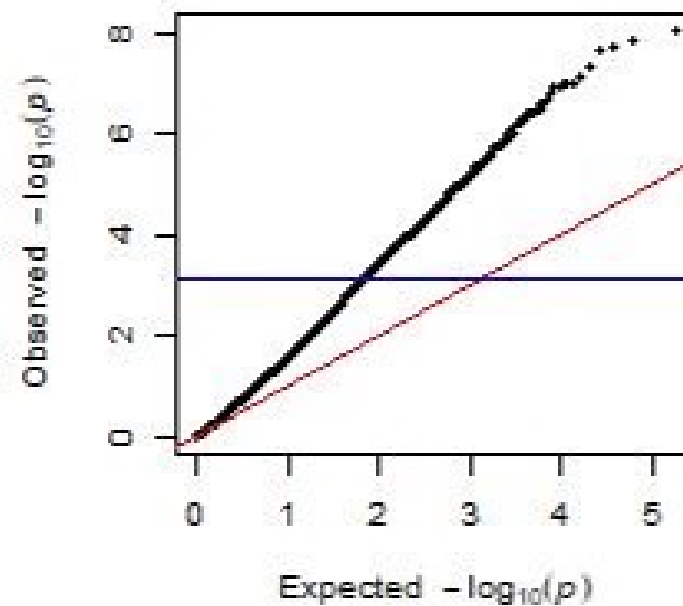

Accounting only for kinship

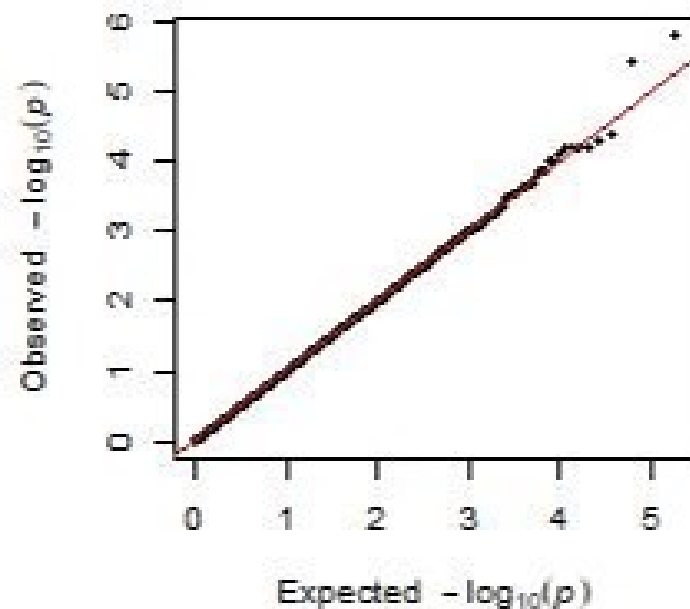

Accounting for kinship and structure

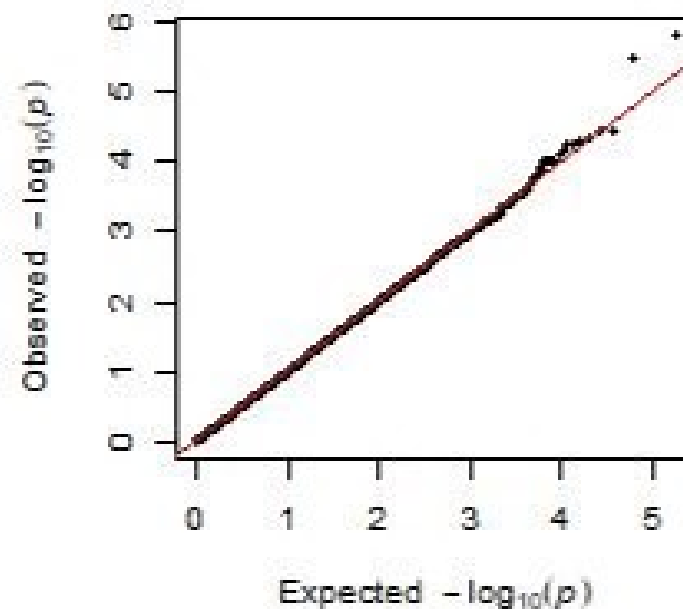

# trait: SCD\_su15\_lu

No accounting for kinship or structure

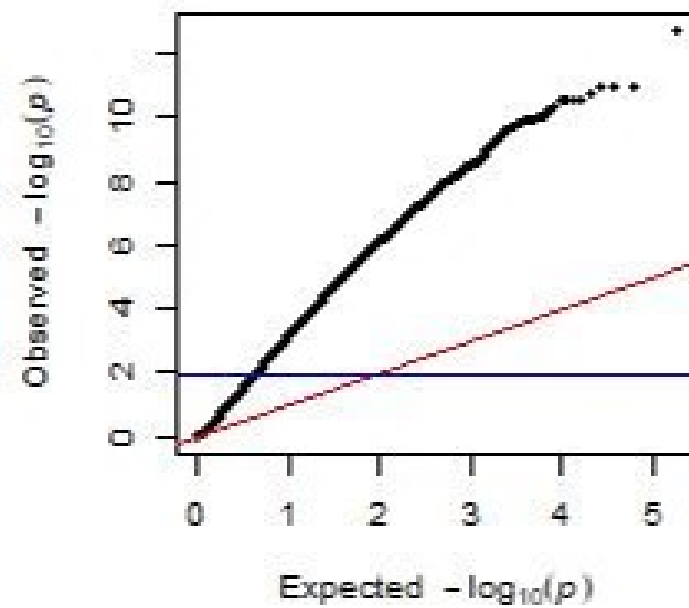

Accounting only for structure

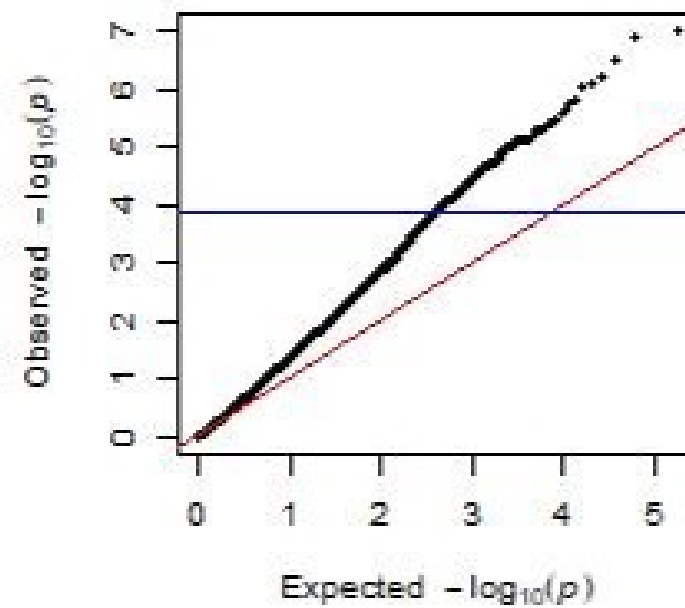

Accounting only for kinship

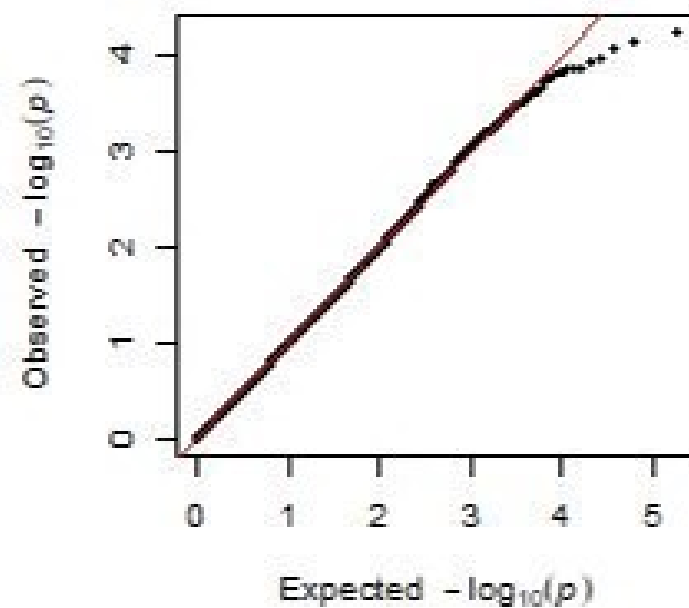

Accounting for kinship and structure

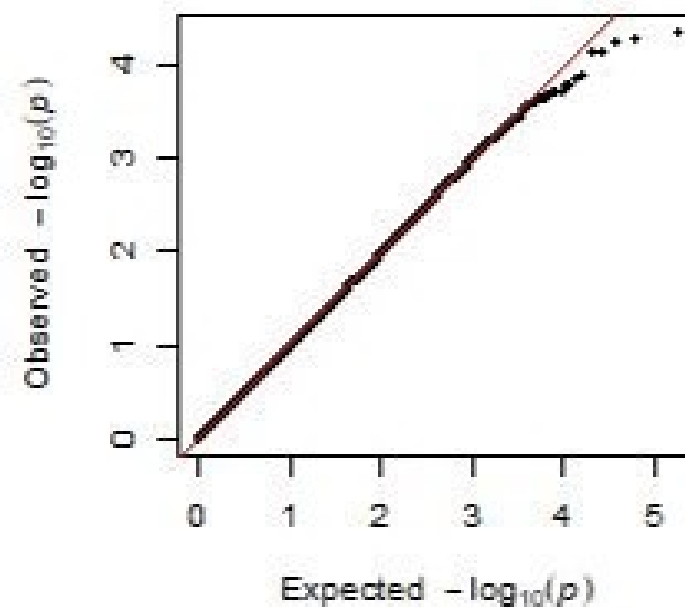

# trait: SCD\_su16\_lu

No accounting for kinship or structure

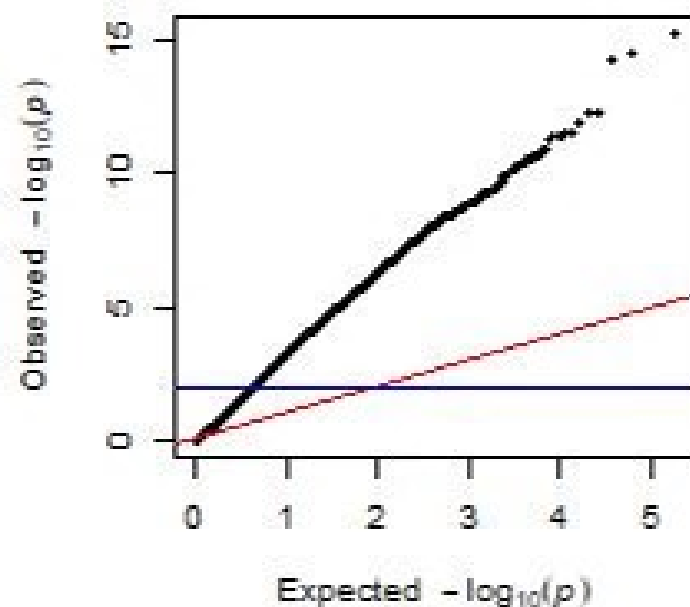

Accounting only for structure

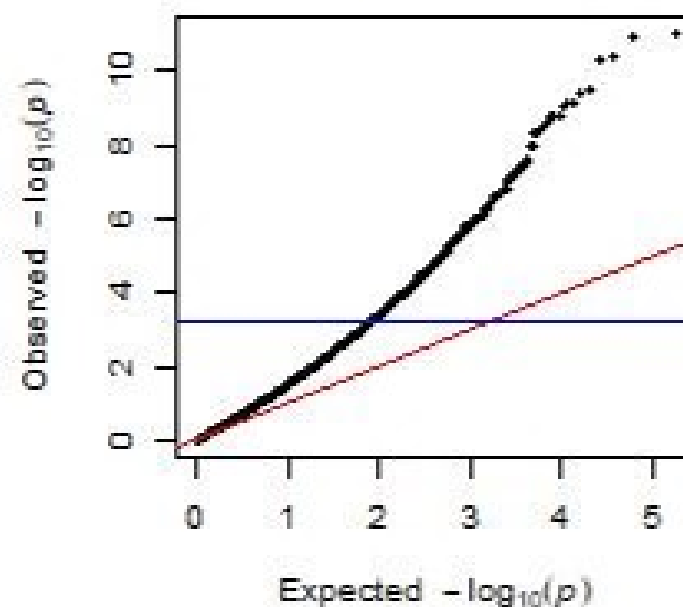

Accounting only for kinship

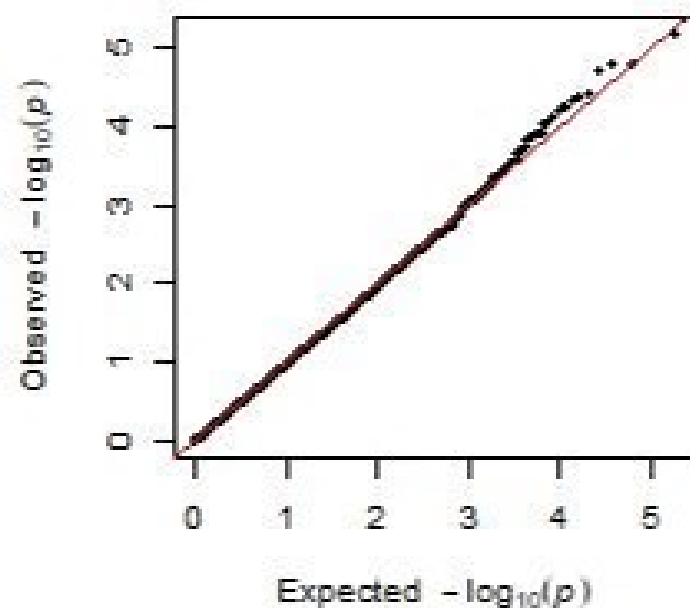

Accounting for kinship and structure

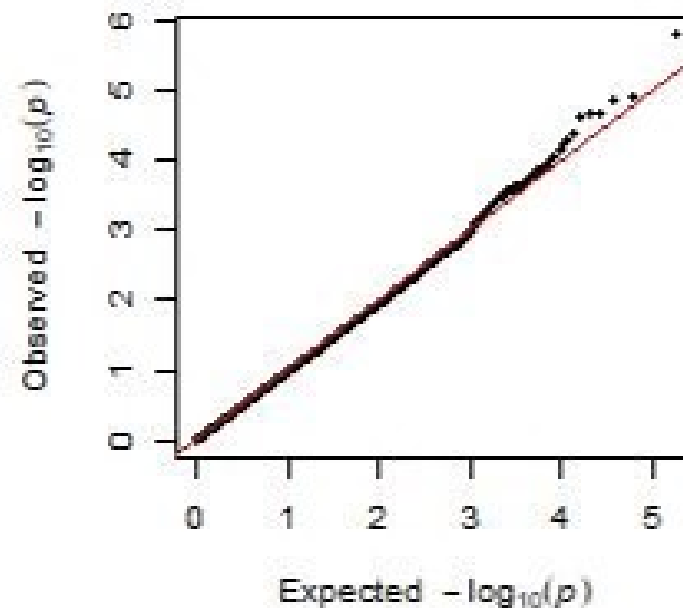

# trait: SCD\_su17\_lu

No accounting for kinship or structure

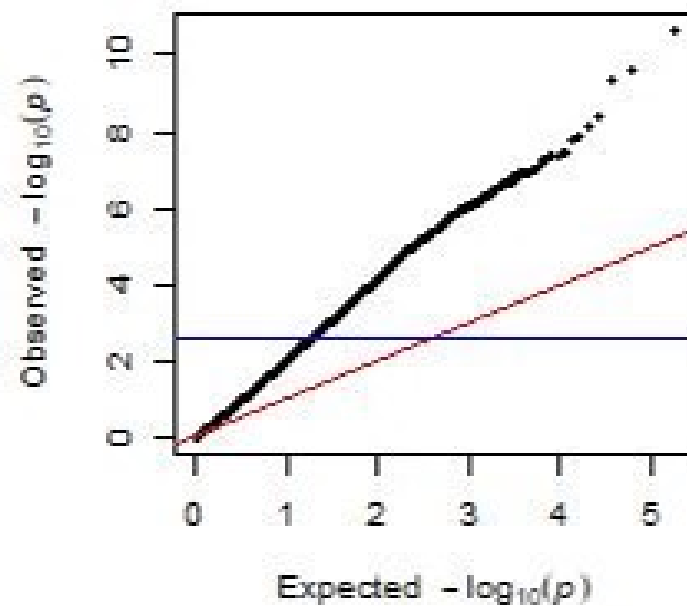

Accounting only for structure

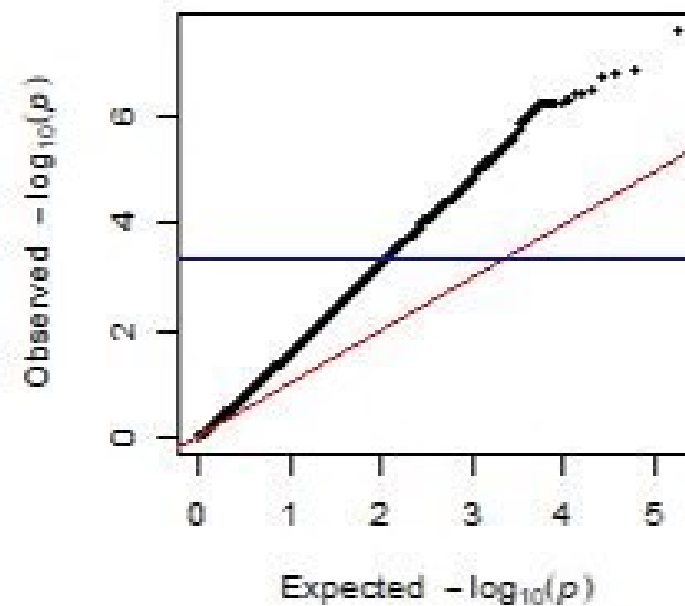

Accounting only for kinship

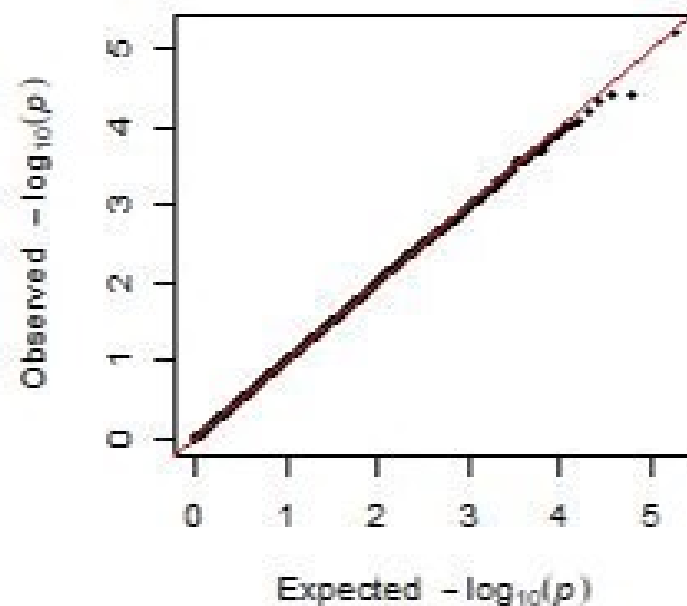

Accounting for kinship and structure

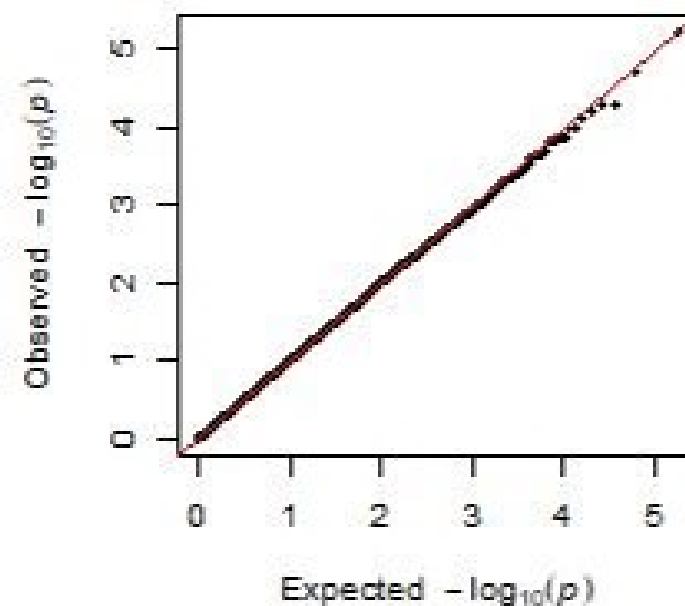

# trait: SCD\_su17\_me

No accounting for kinship or structure

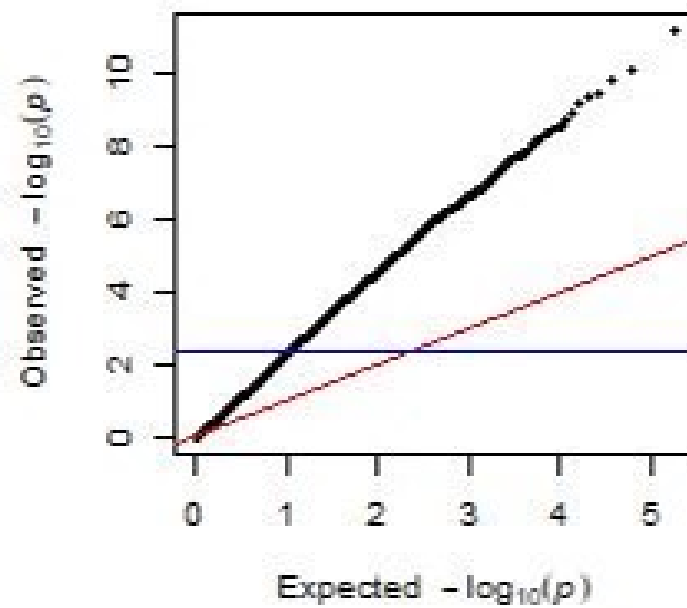

Accounting only for structure

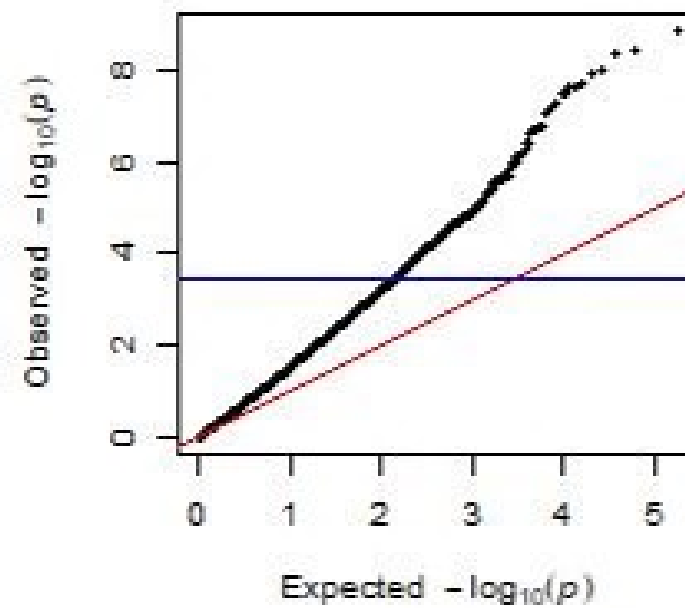

Accounting only for kinship

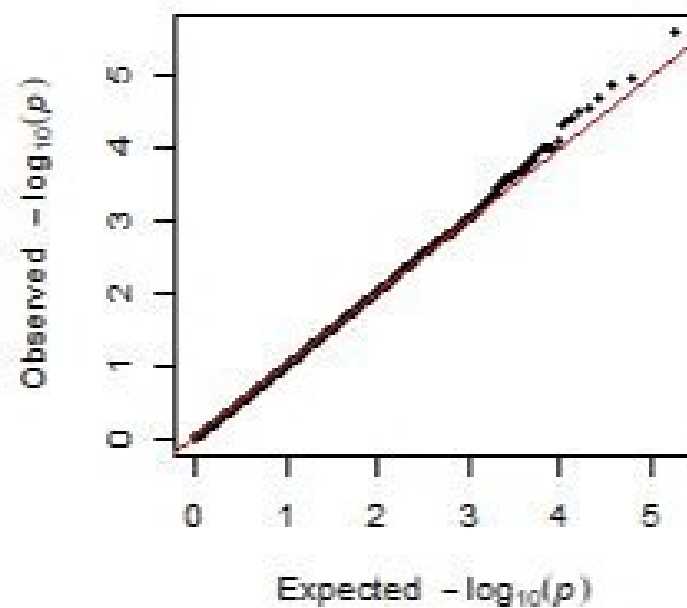

Accounting for kinship and structure

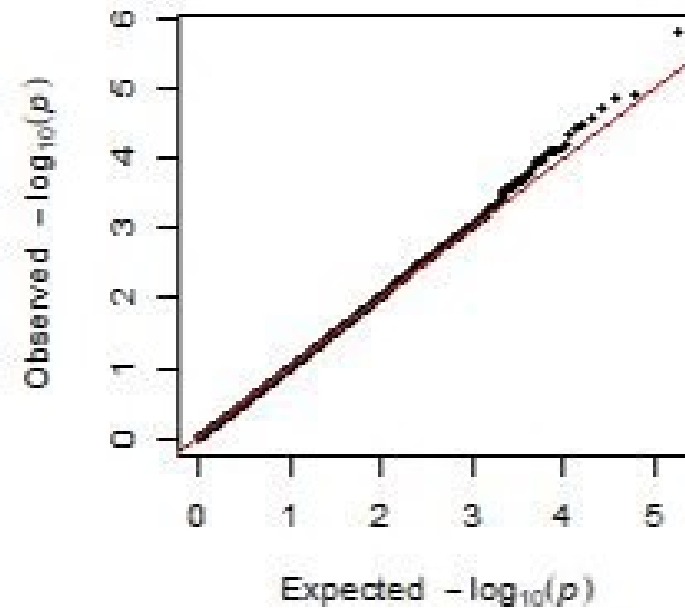

# trait: SCD\_wi1516\_lu

No accounting for kinship or structure

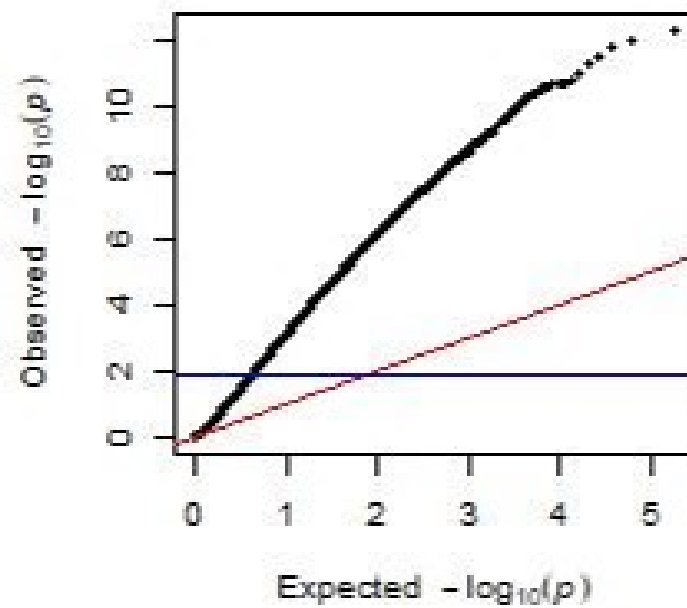

Accounting only for structure

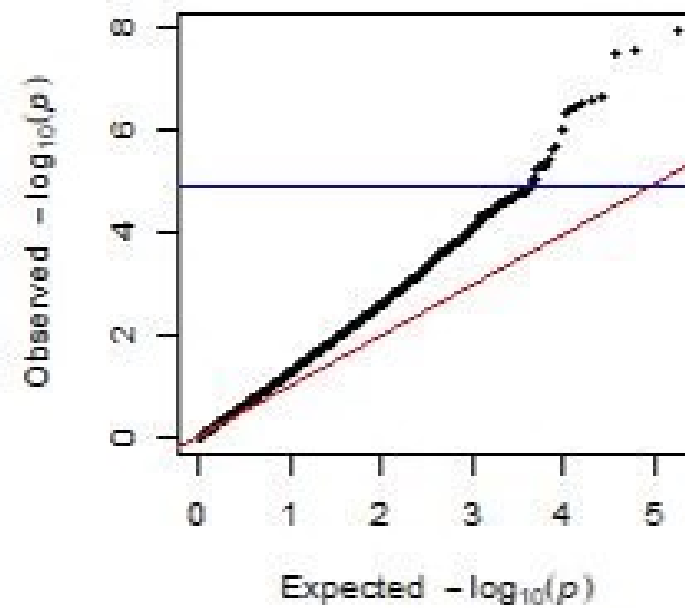

Accounting only for kinship

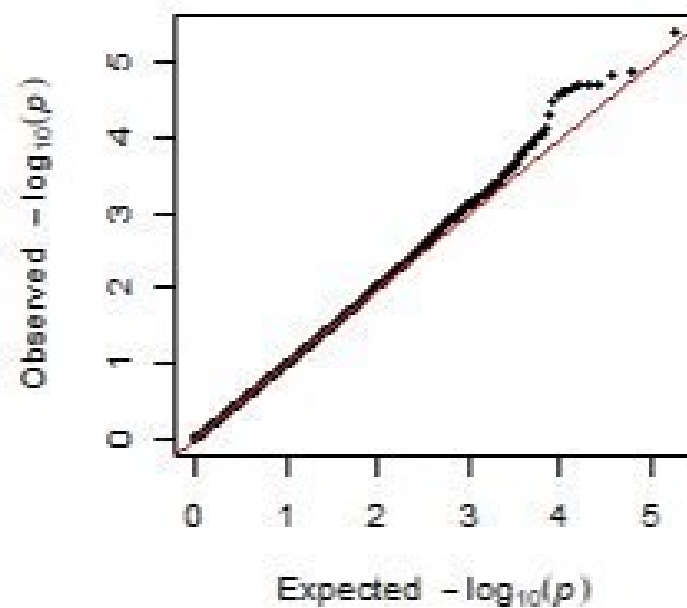

Accounting for kinship and structure

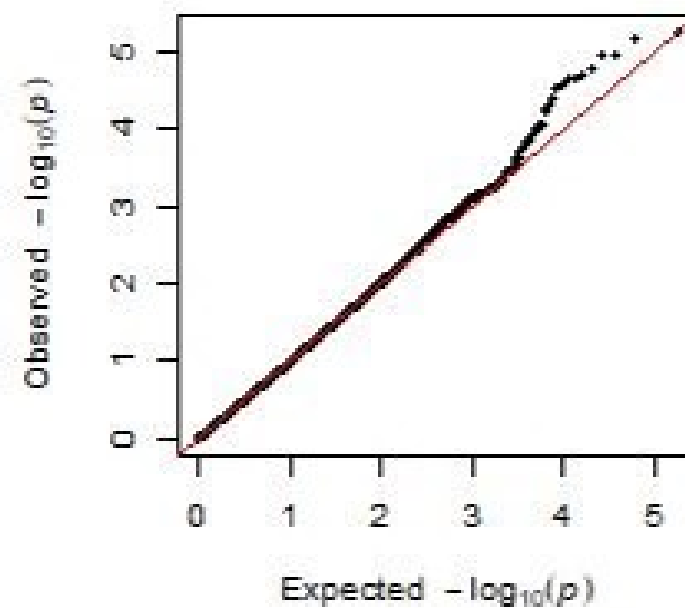

# trait: SCD\_wi1516\_po

No accounting for kinship or structure

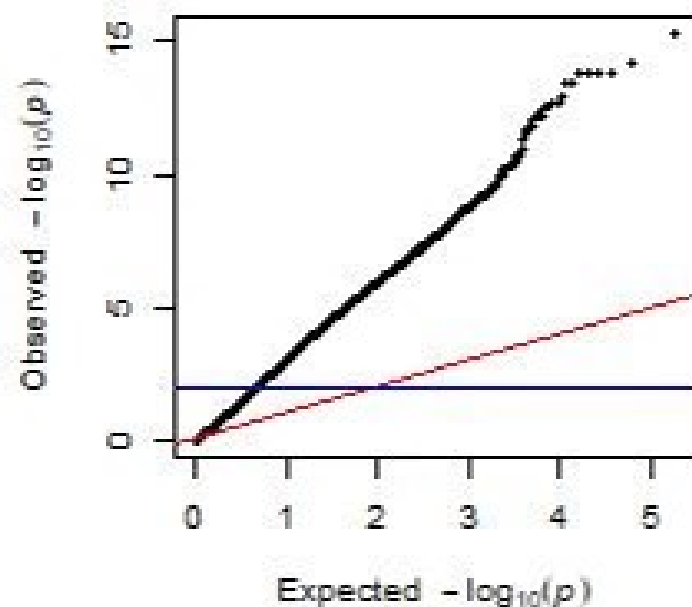

Accounting only for structure

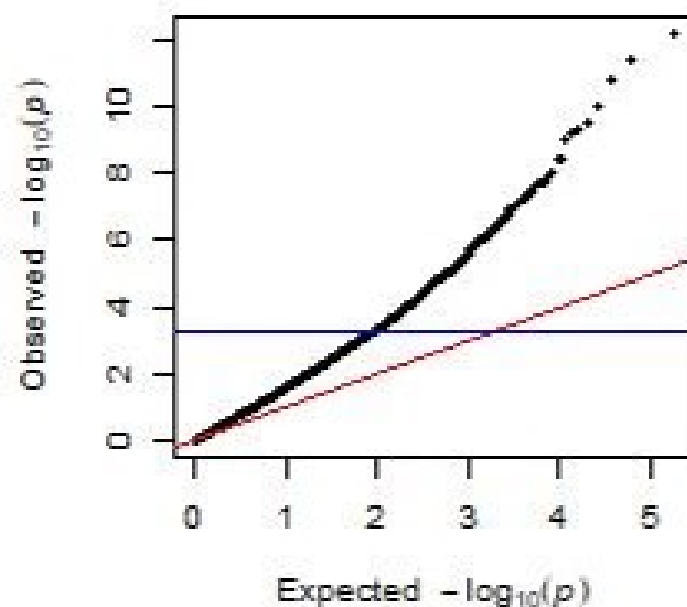

Accounting only for kinship

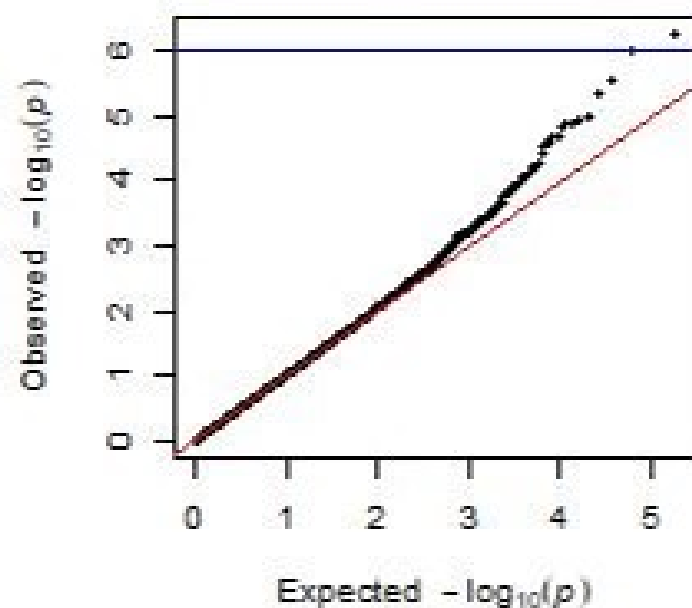

Accounting for kinship and structure

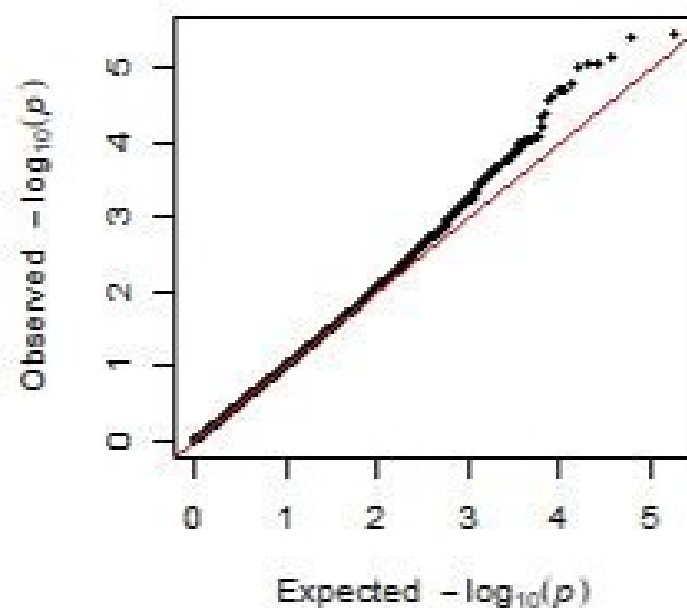



# trait: SCD\_wi1617\_lu

No accounting for kinship or structure

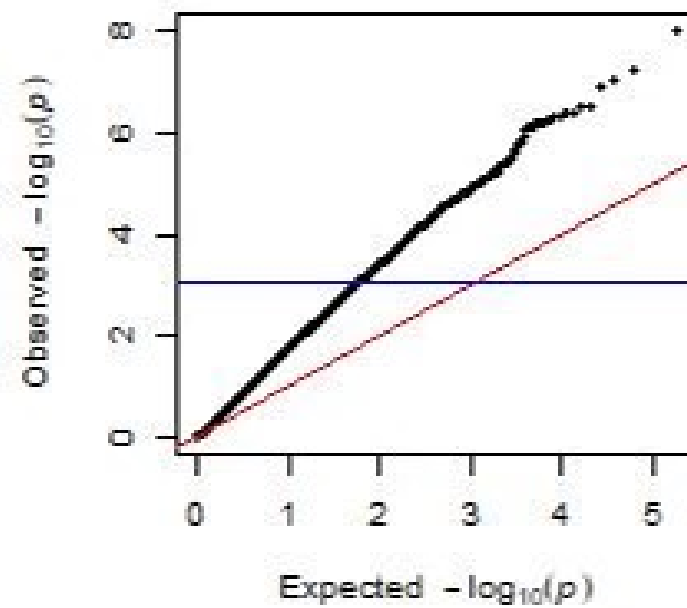

Accounting only for structure

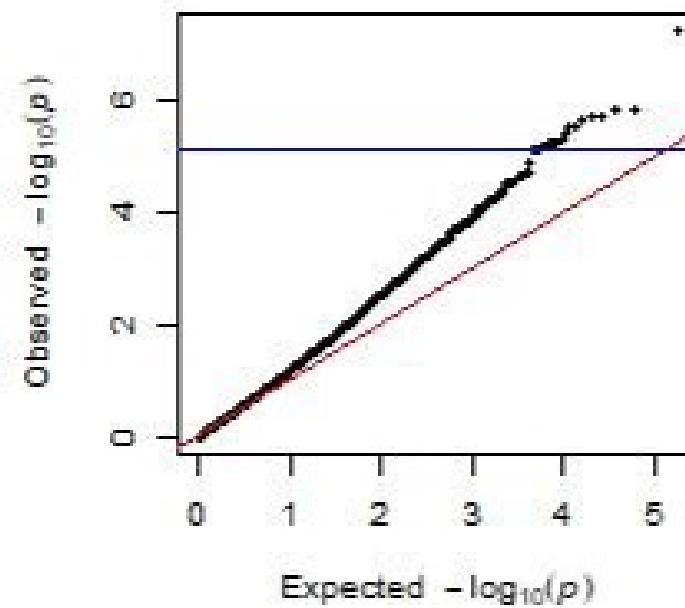

Accounting only for kinship

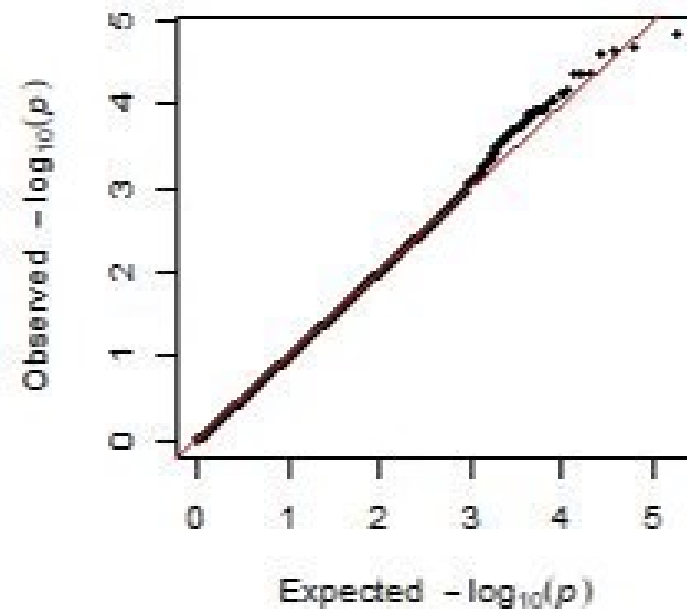

Accounting for kinship and structure

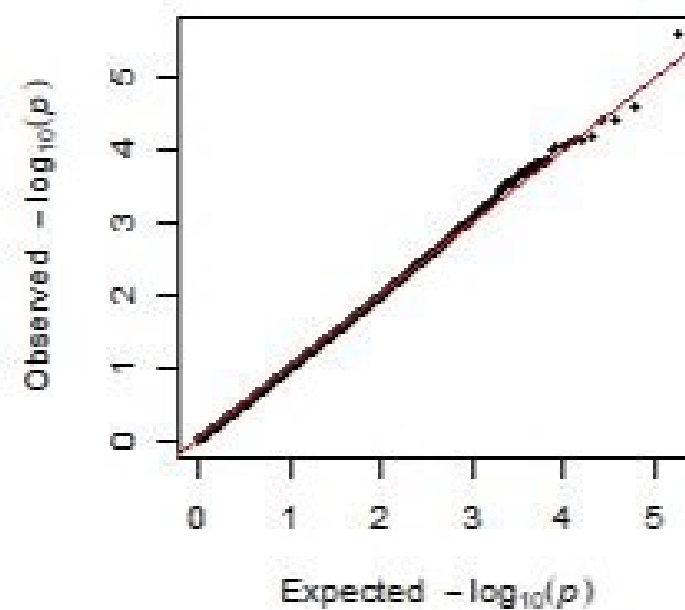

# trait: SCD\_wi1617\_me

No accounting for kinship or structure

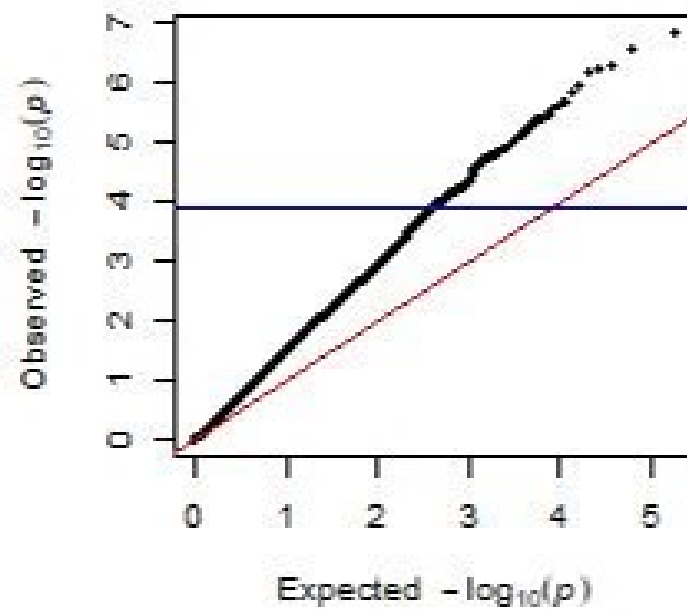

Accounting only for structure

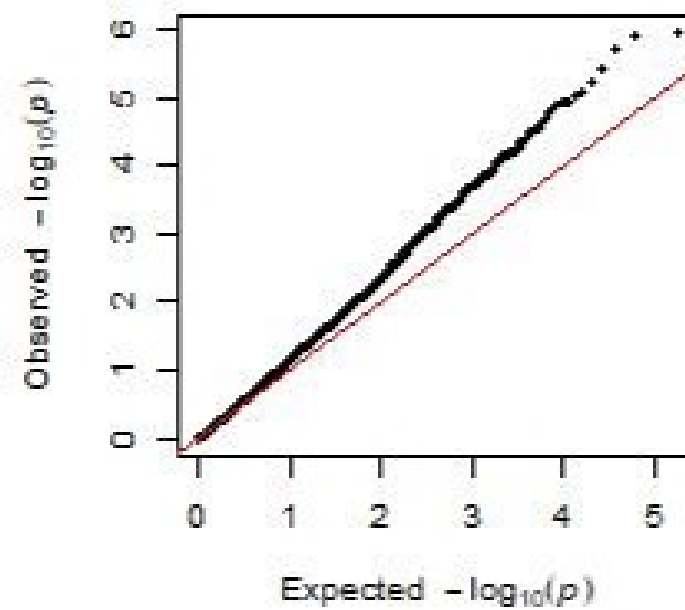

Accounting only for kinship

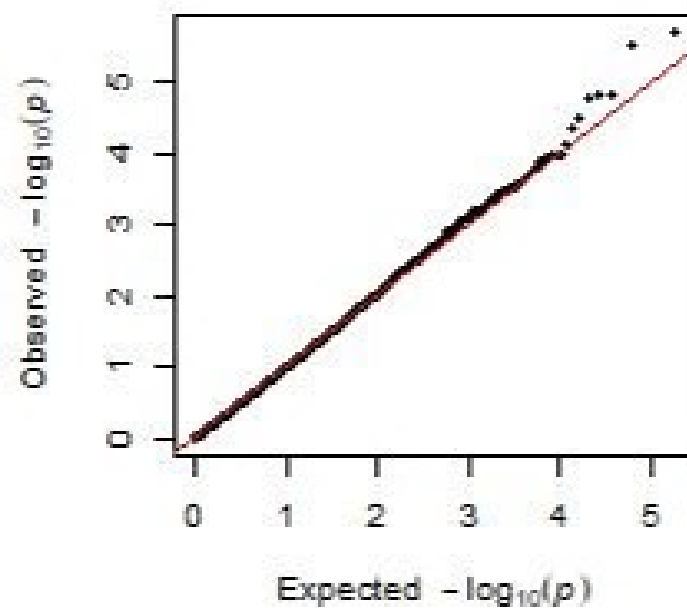

Accounting for kinship and structure

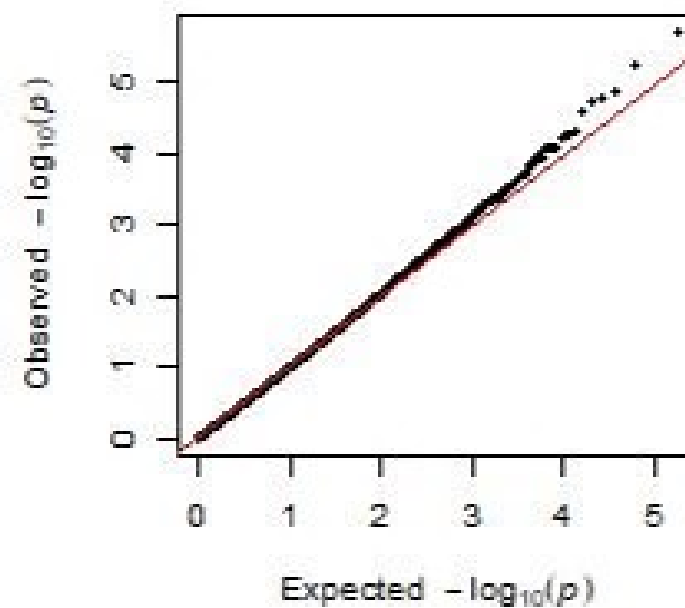

# trait: SCD\_wi1617\_po

No accounting for kinship or structure

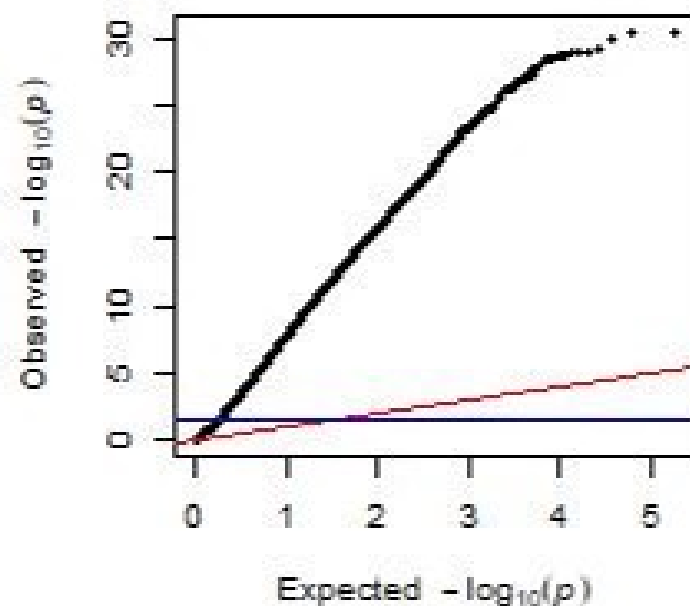

Accounting only for structure

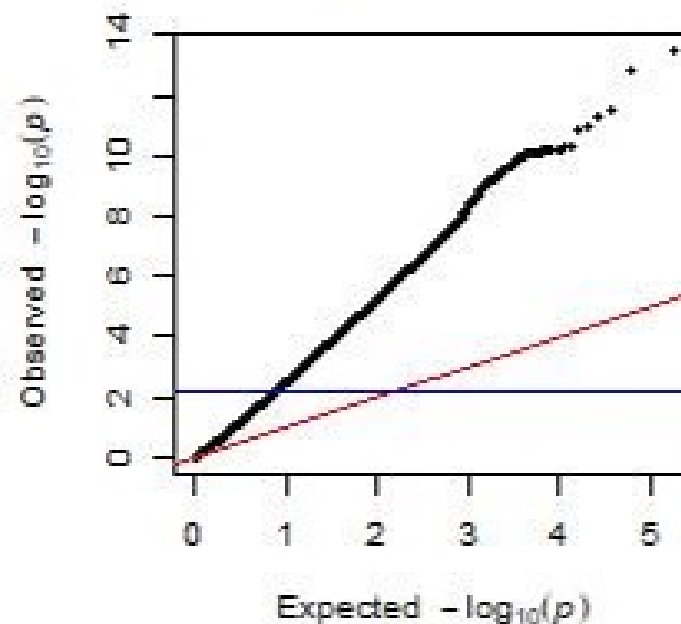

Accounting only for kinship

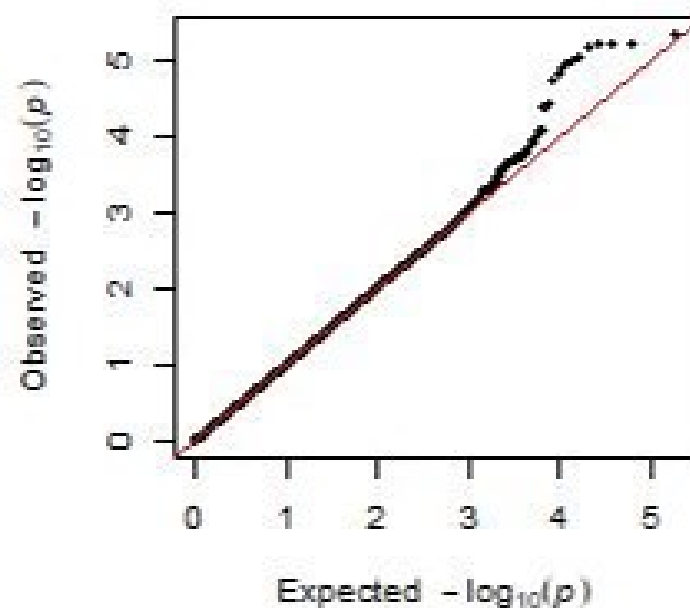

Accounting for kinship and structure

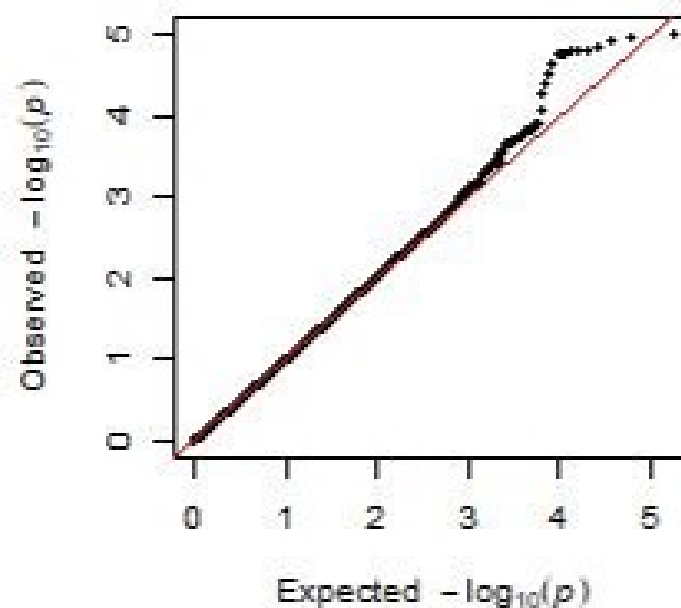

# trait: SCD\_wi1718\_lu

No accounting for kinship or structure

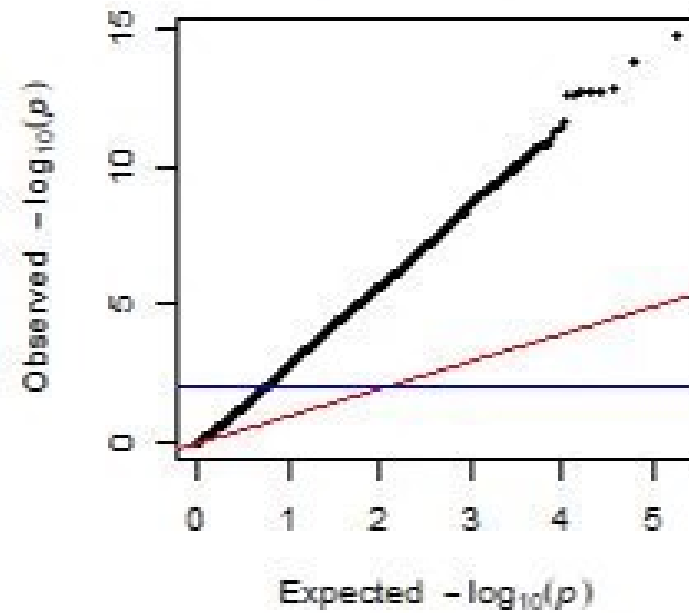

Accounting only for structure

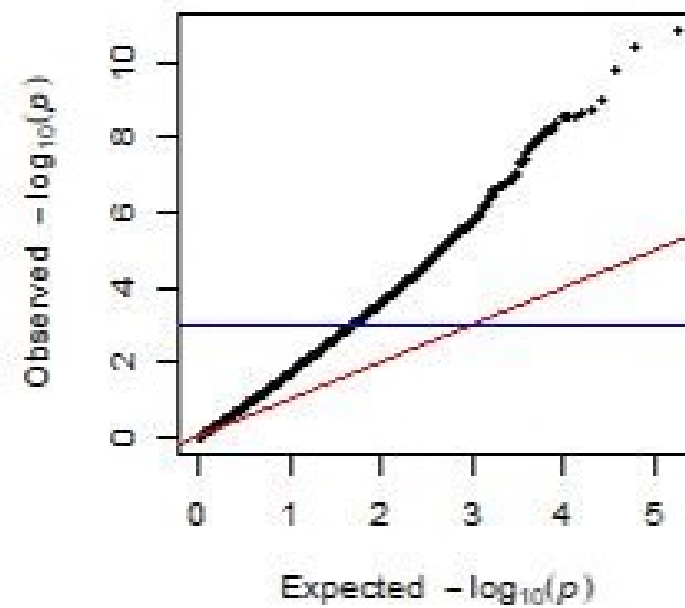

Accounting only for kinship

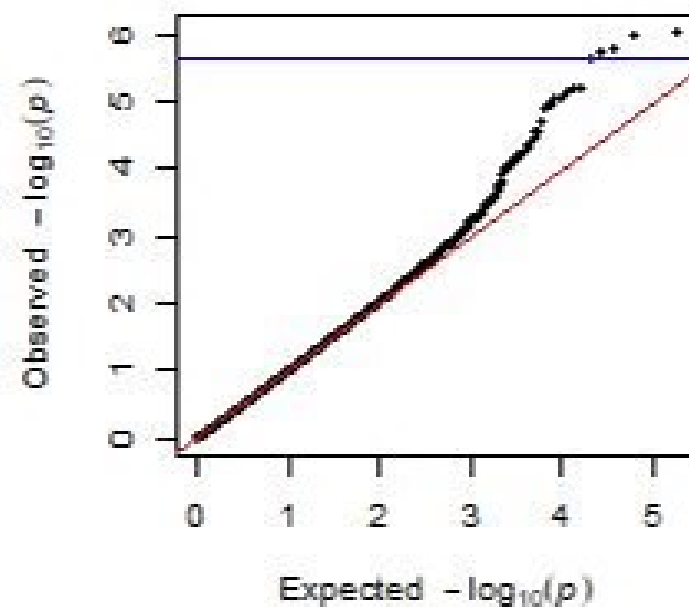

Accounting for kinship and structure

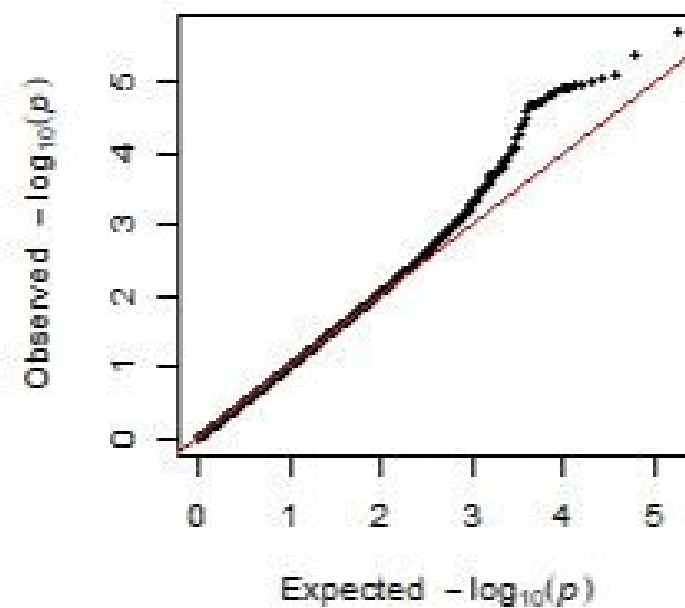

# trait: SGR\_lu16

No accounting for kinship or structure

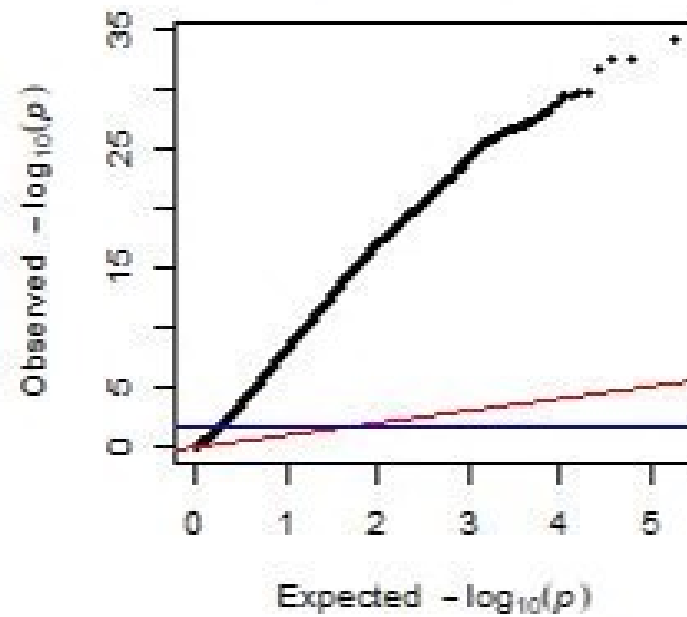

Accounting only for structure

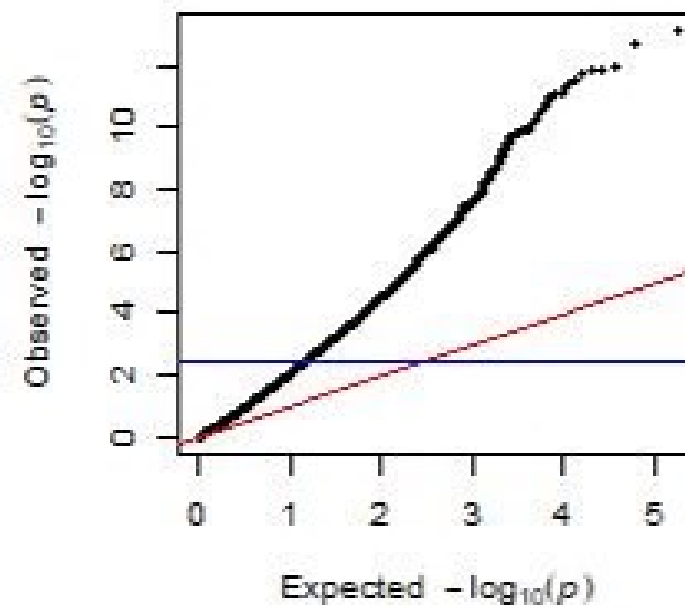

Accounting only for kinship

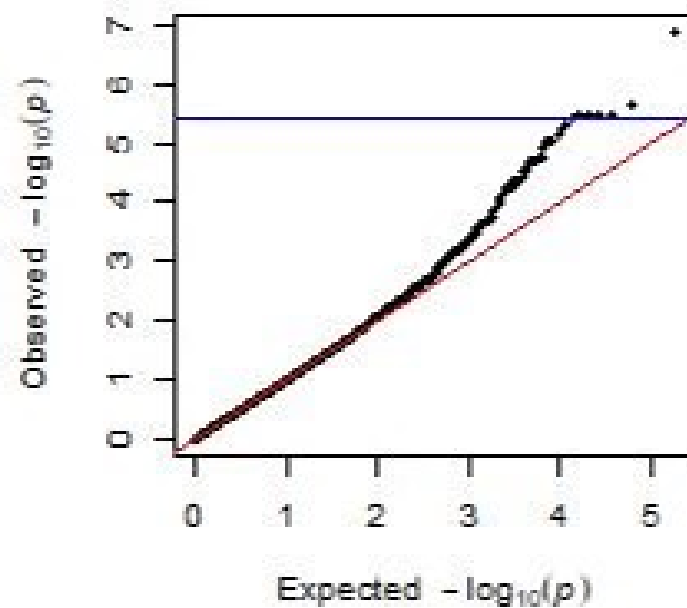

Accounting for kinship and structure

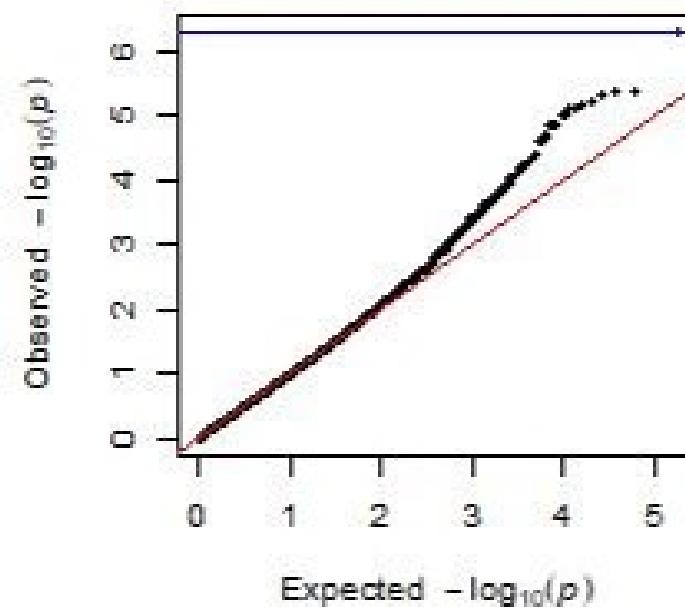

# trait: SGR\_me16

No accounting for kinship or structure

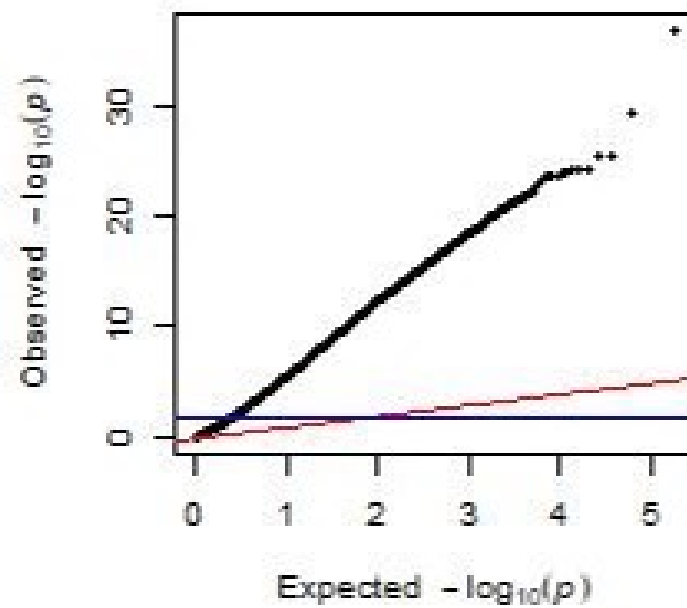

Accounting only for structure

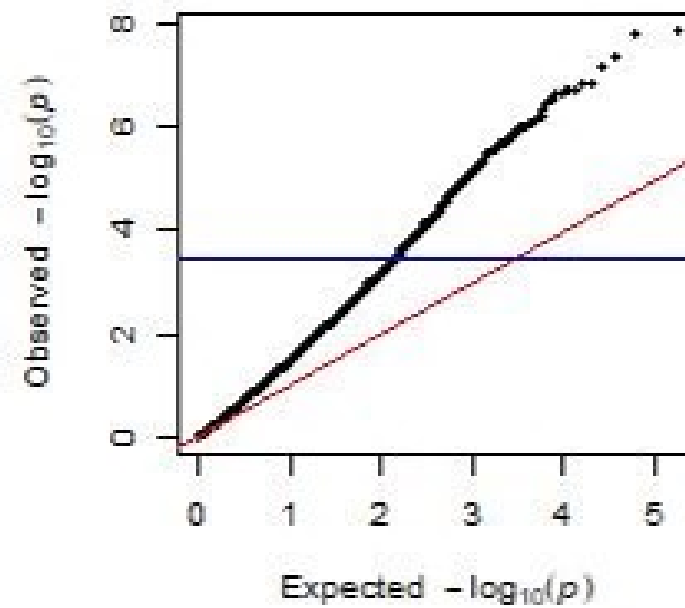

Accounting only for kinship

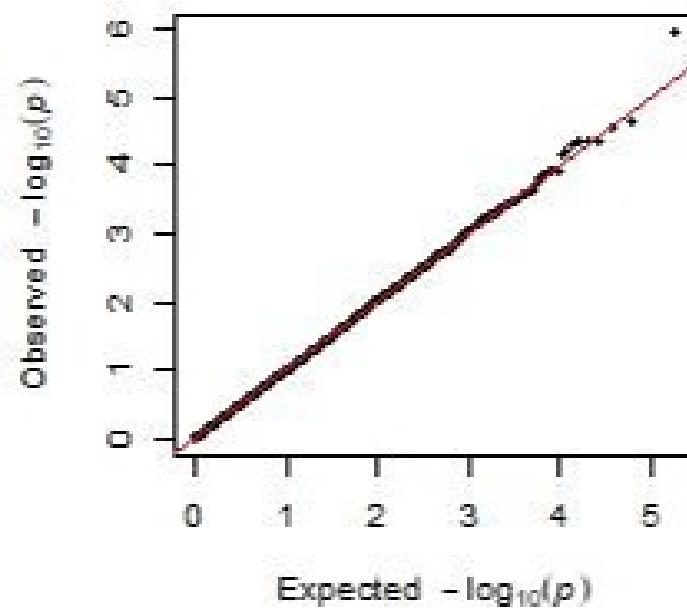

Accounting for kinship and structure

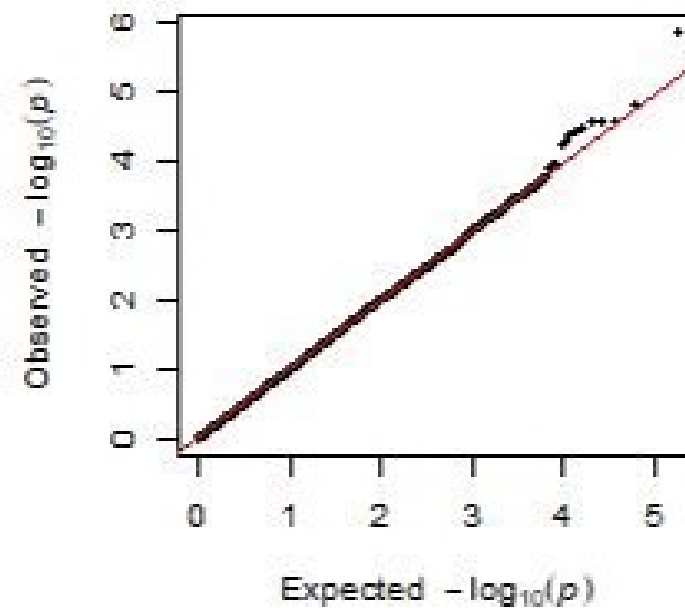

# trait: SGR\_me17

No accounting for kinship or structure

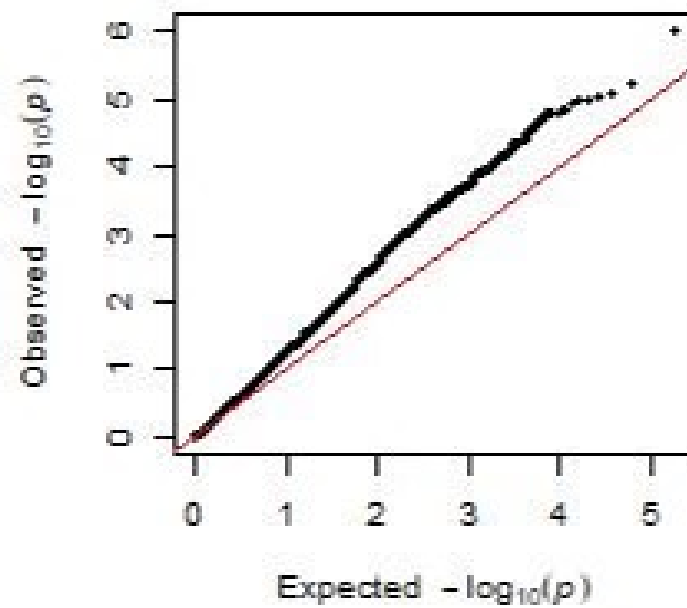

Accounting only for structure

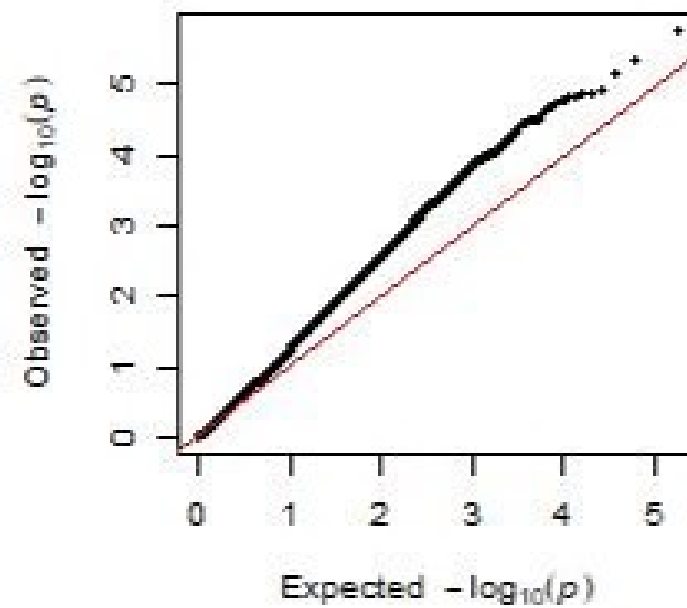

Accounting only for kinship

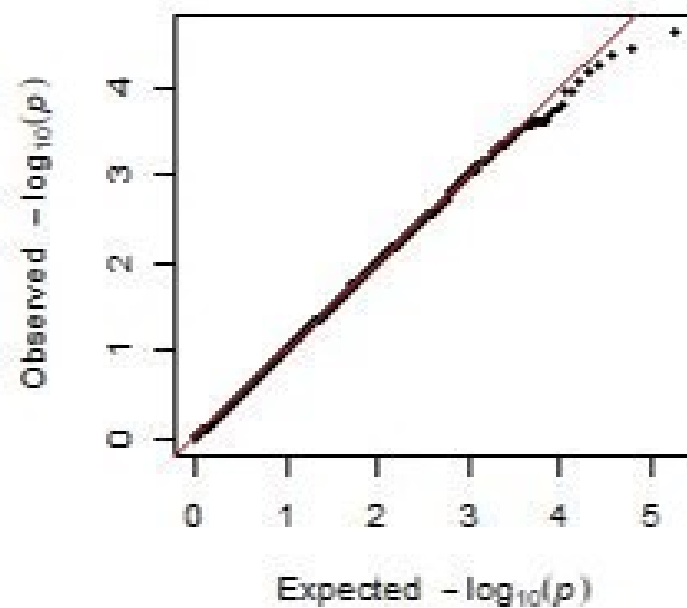

Accounting for kinship and structure

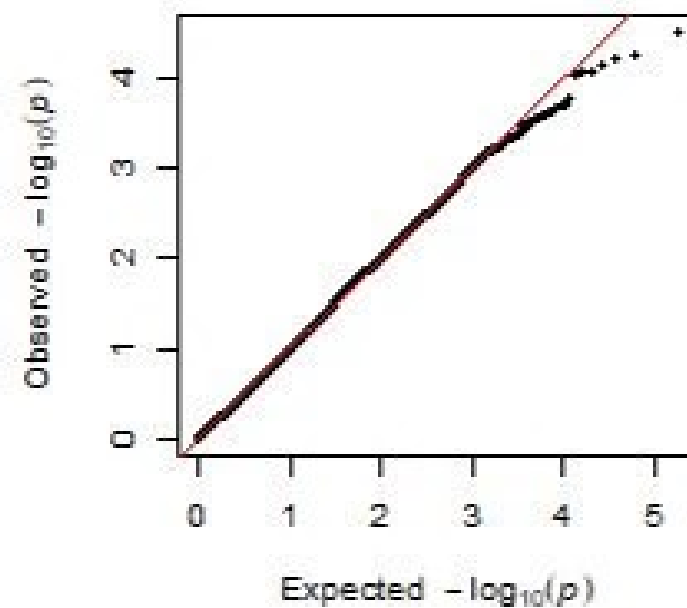

# trait: SGR\_po17

No accounting for kinship or structure

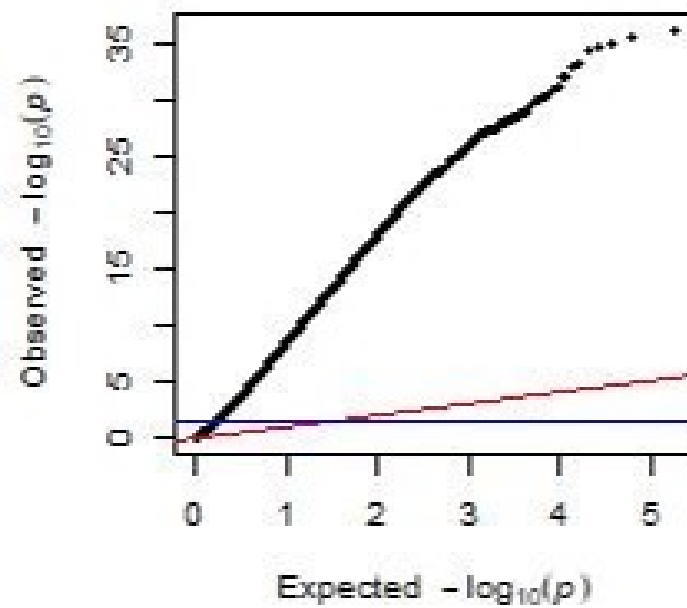

Accounting only for structure

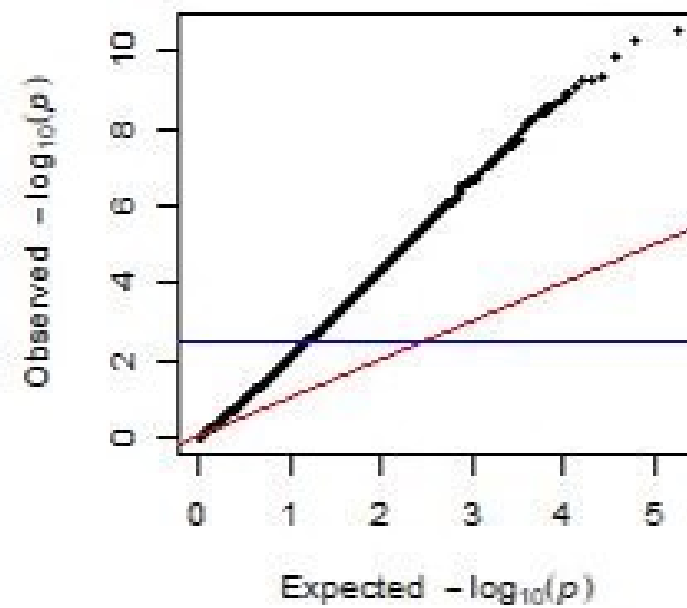

Accounting only for kinship

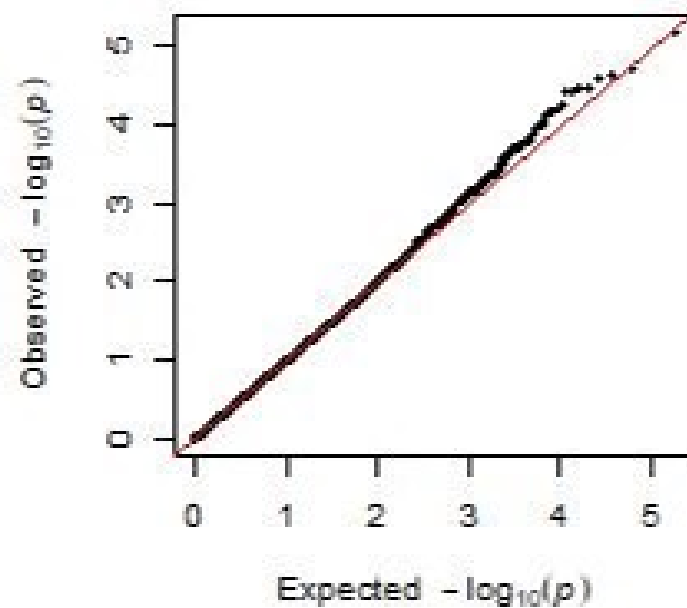

Accounting for kinship and structure

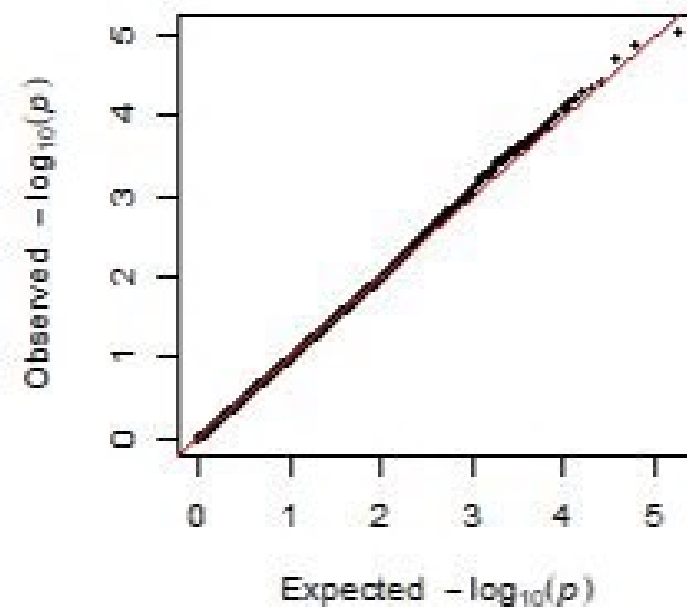



# trait: SMH\_lu16

No accounting for kinship or structure

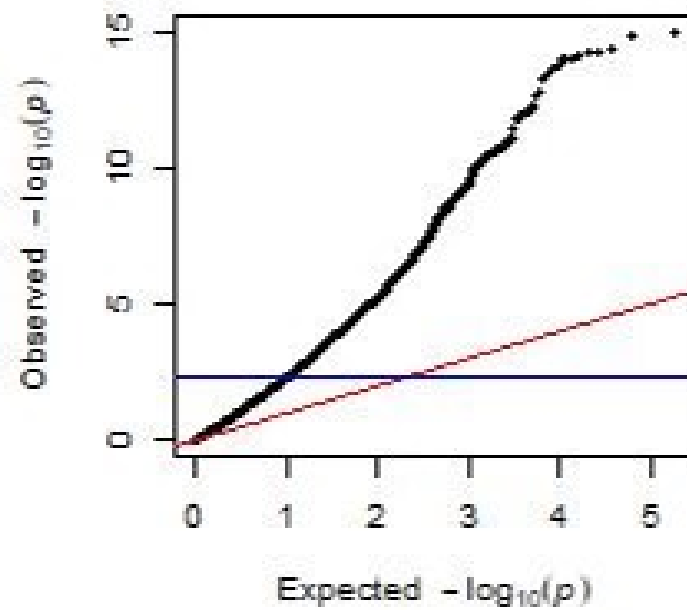

Accounting only for structure

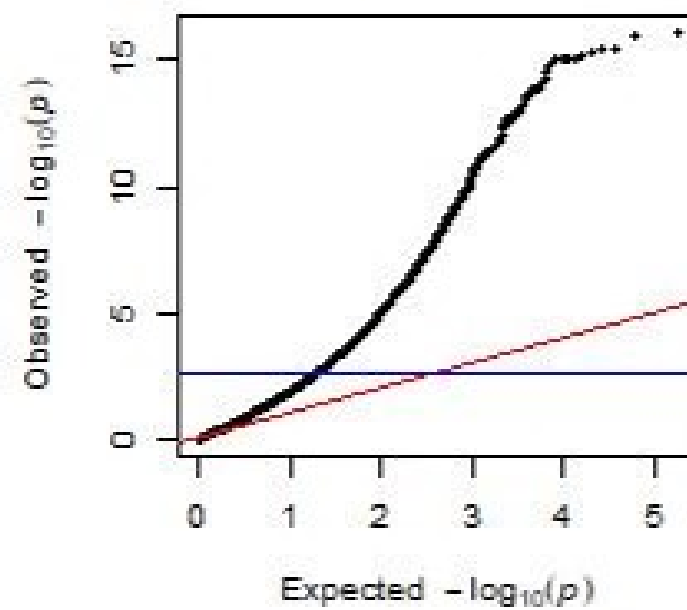

Accounting only for kinship

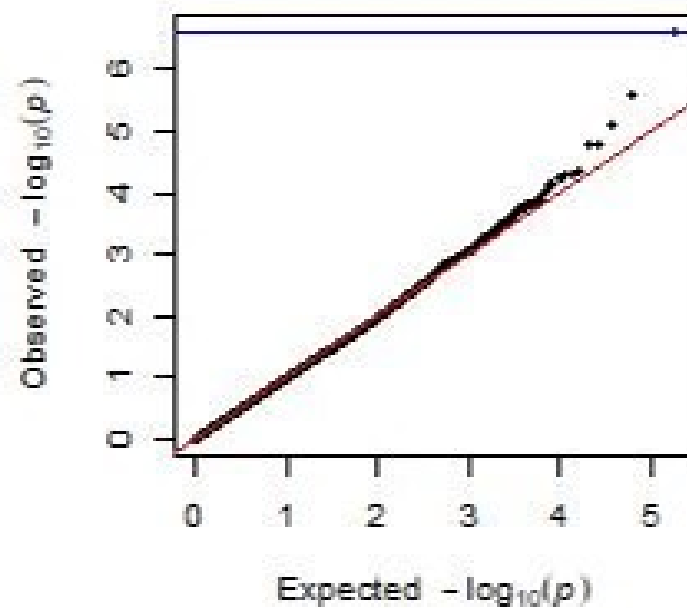

Accounting for kinship and structure

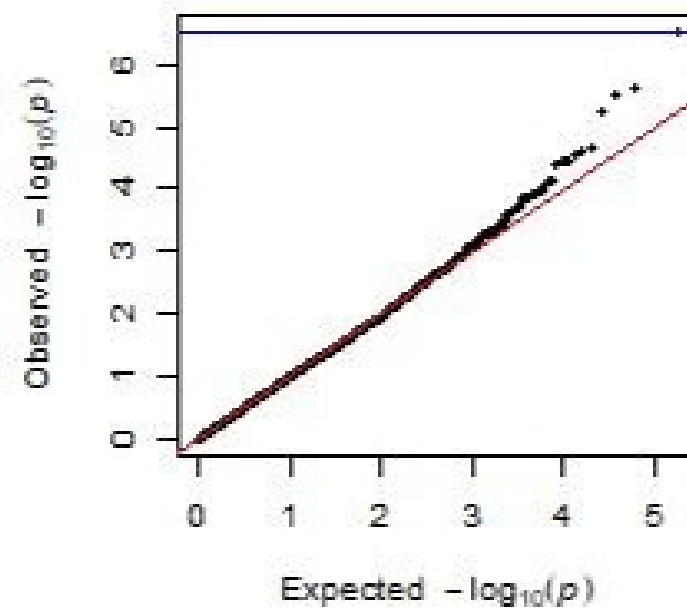

# trait: SMH\_me16

No accounting for kinship or structure

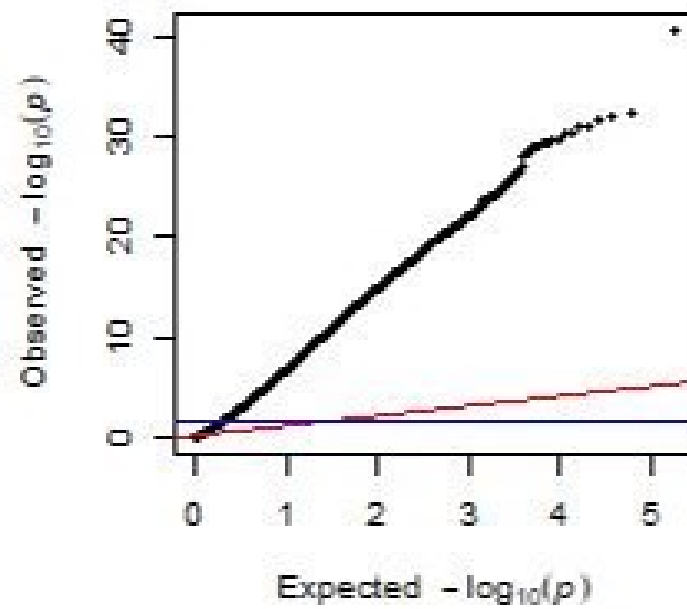

Accounting only for structure

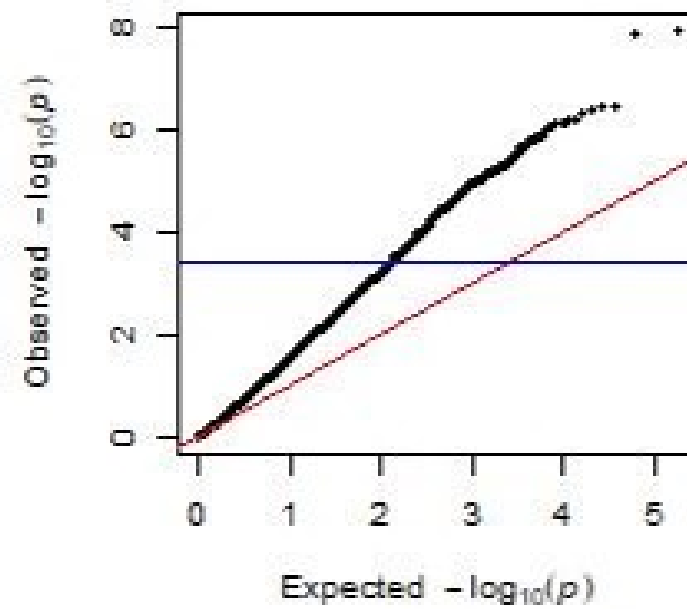

Accounting only for kinship

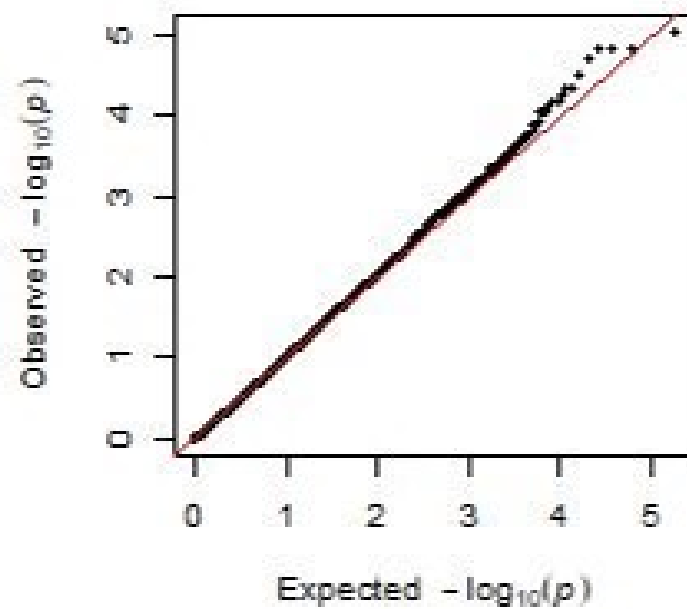

Accounting for kinship and structure

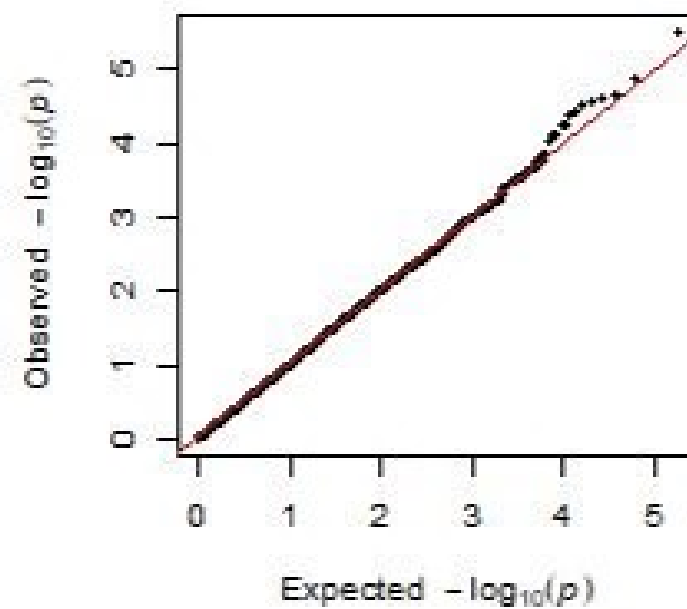

# trait: SMH\_me17

No accounting for kinship or structure

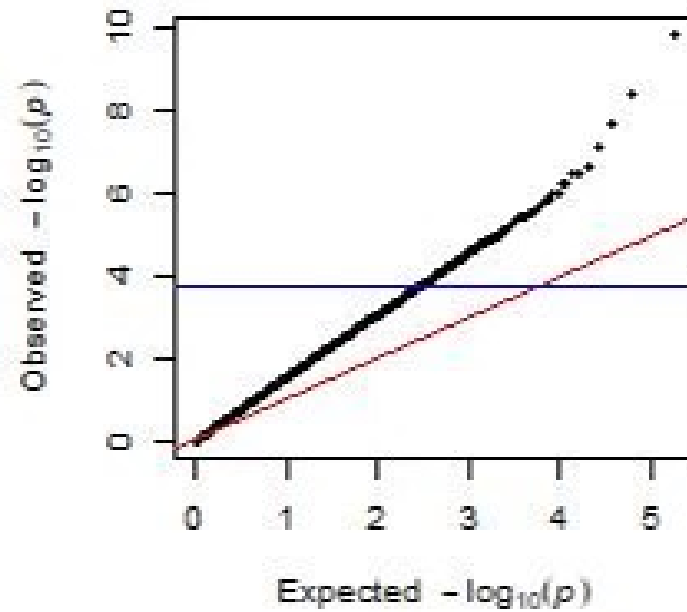

Accounting only for structure

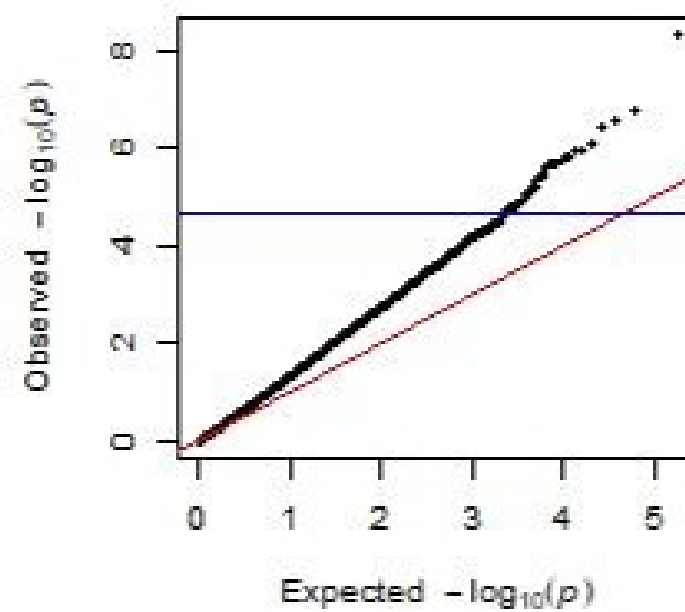

Accounting only for kinship

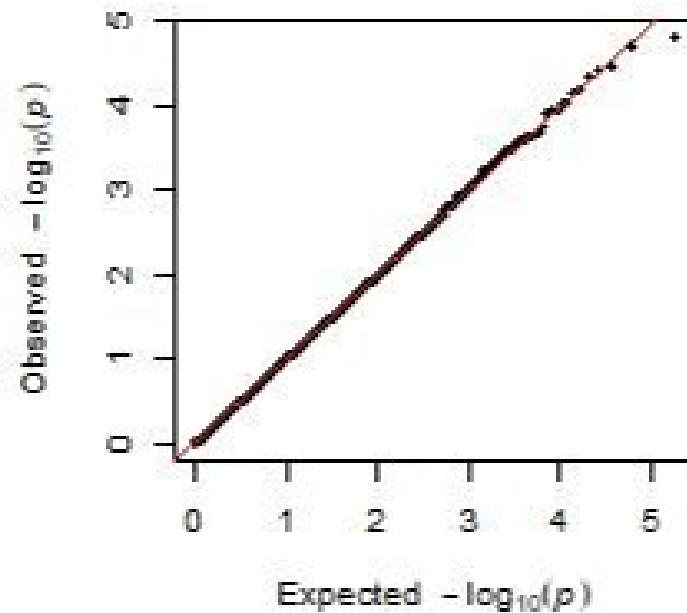

Accounting for kinship and structure

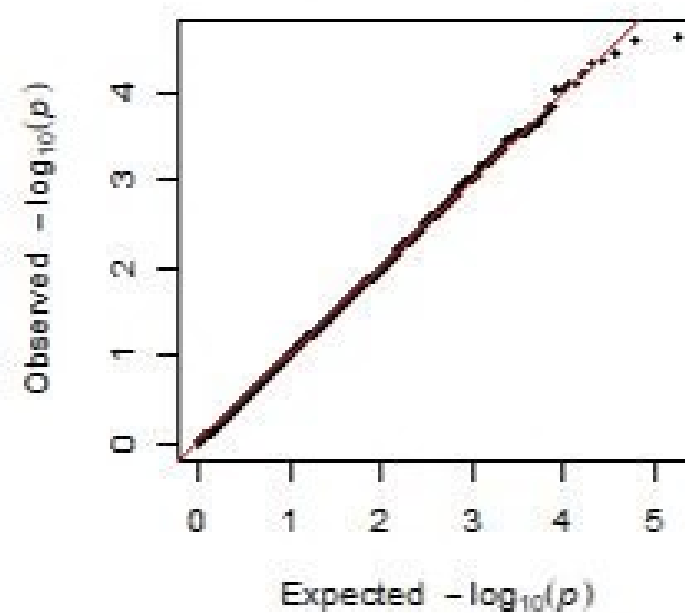

# trait: SMH\_po17

No accounting for kinship or structure

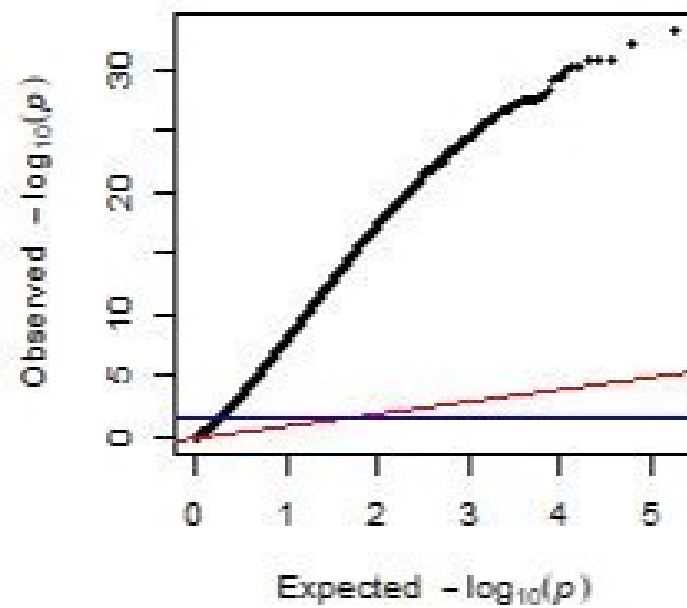

Accounting only for structure

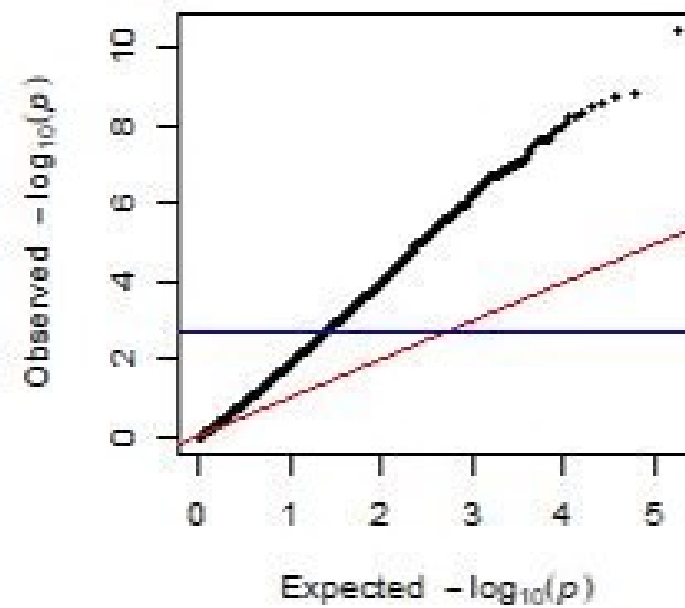

Accounting only for kinship

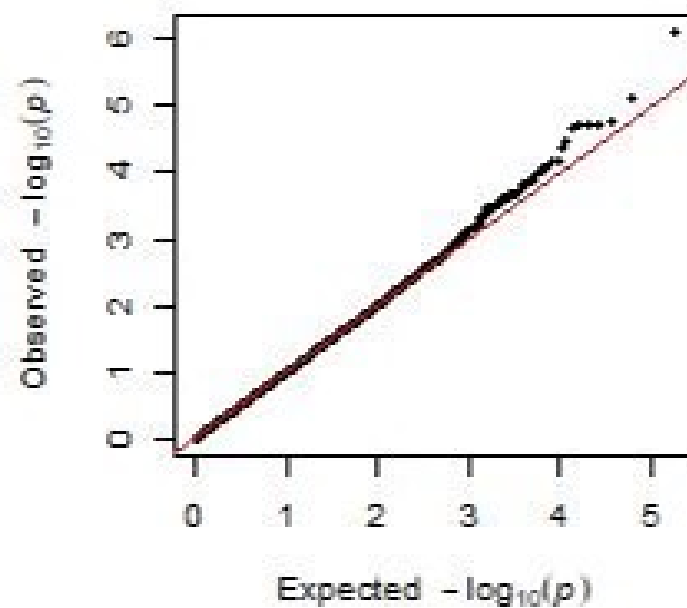

Accounting for kinship and structure

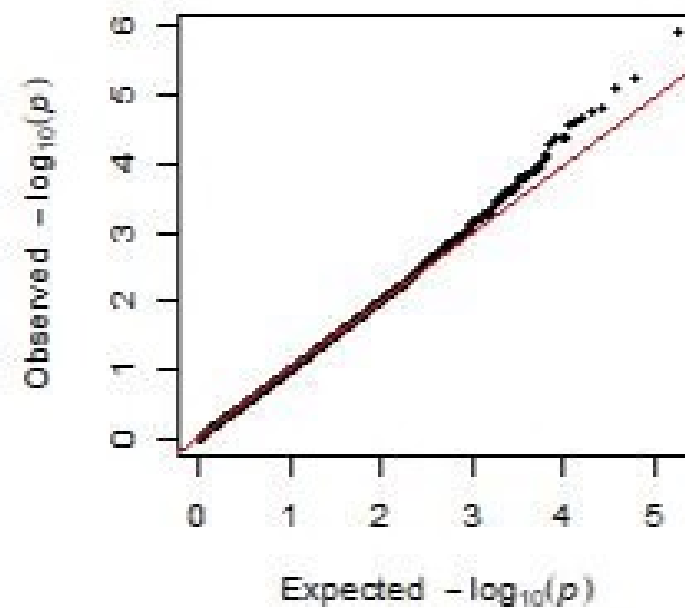

# trait: VAC\_avg

No accounting for kinship or structure

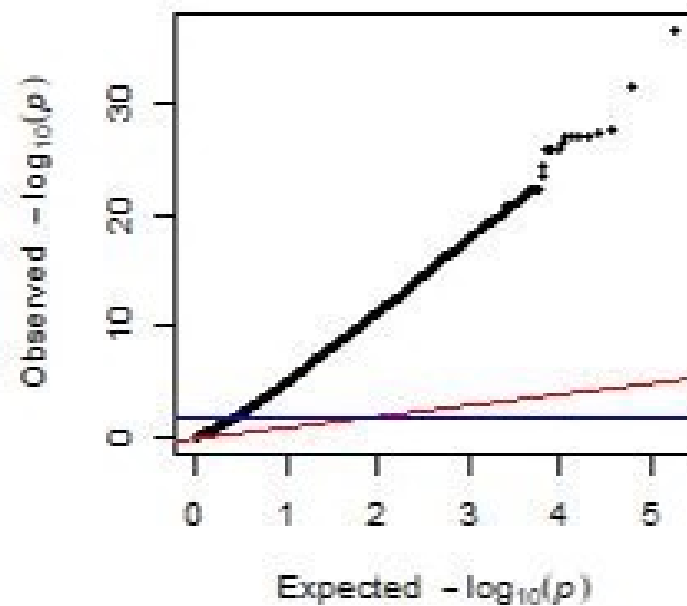

Accounting only for structure

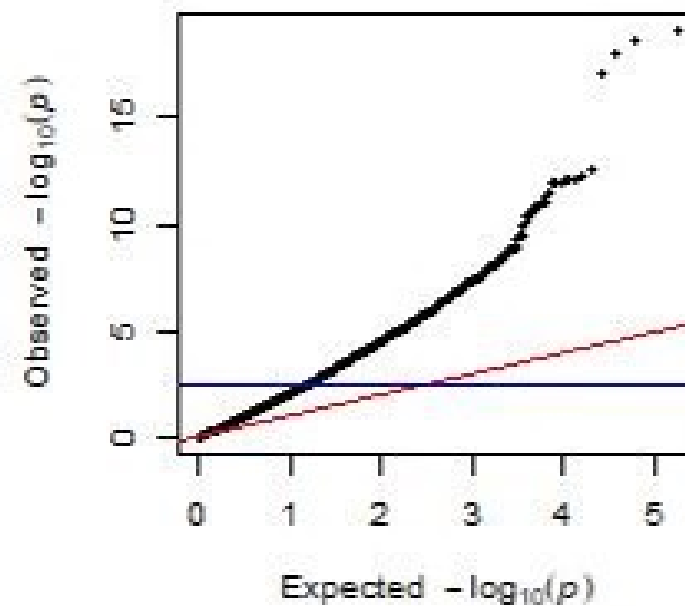

Accounting only for kinship

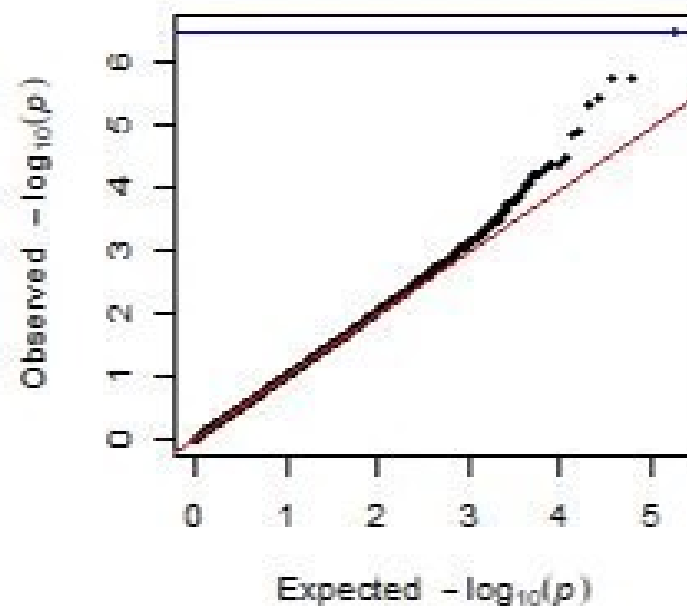

Accounting for kinship and structure

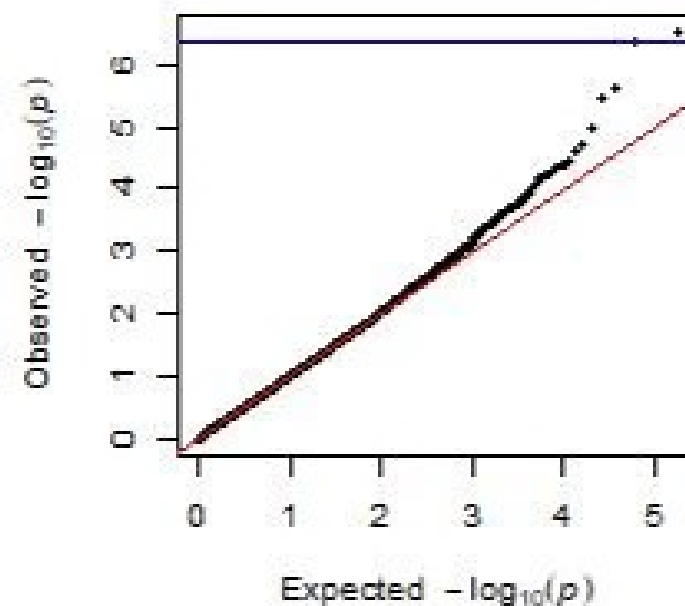

# trait: VAC\_lu16

No accounting for kinship or structure

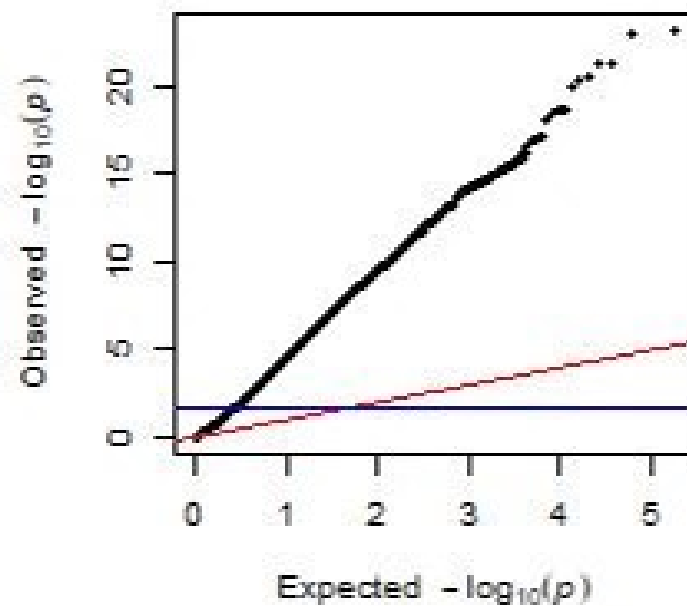

Accounting only for structure

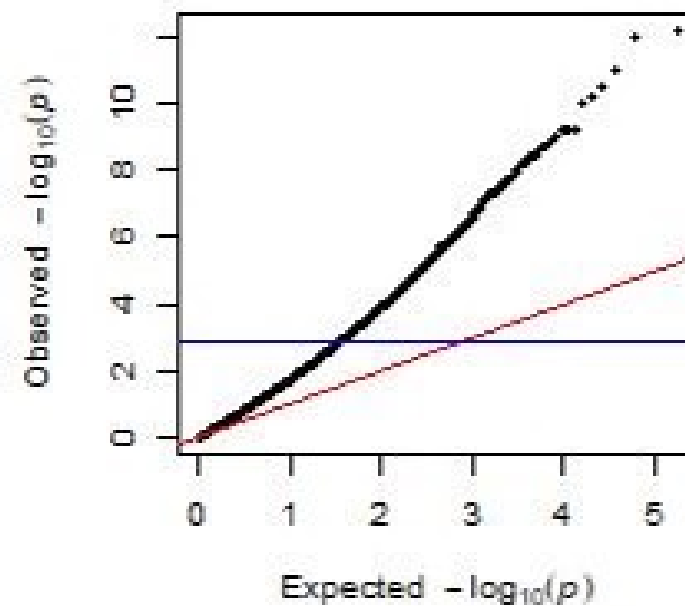

Accounting only for kinship

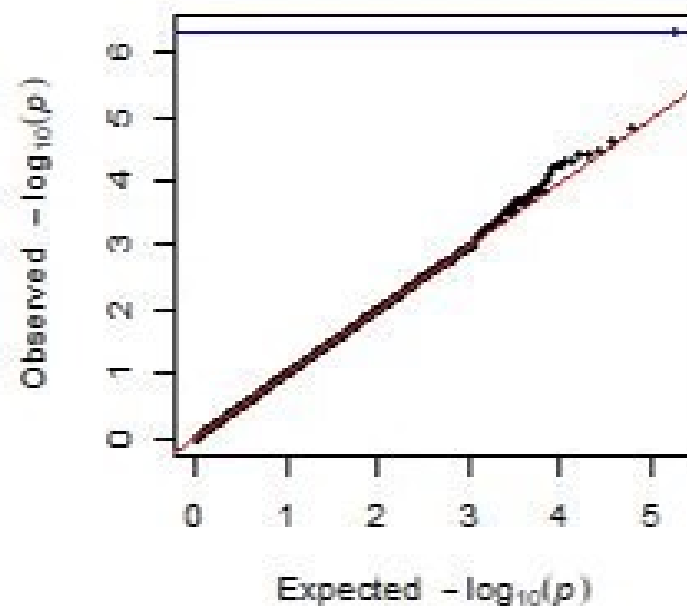

Accounting for kinship and structure

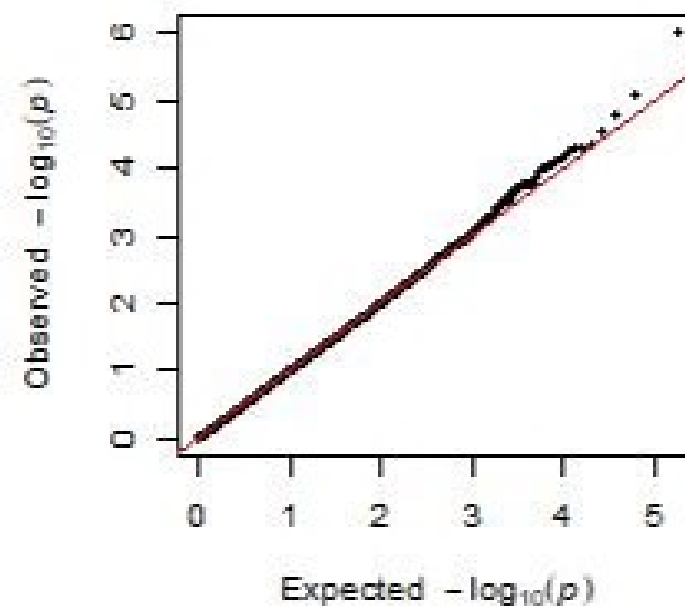

# trait: VAC\_lu17

No accounting for kinship or structure

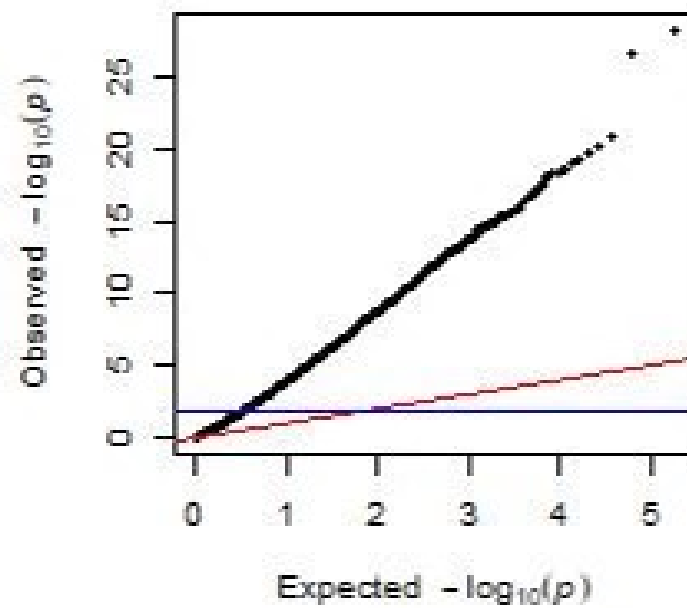

Accounting only for structure

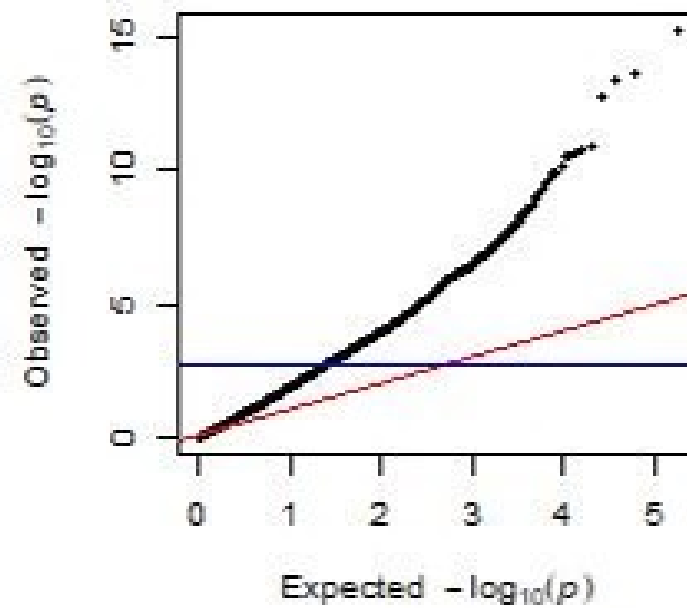

Accounting only for kinship

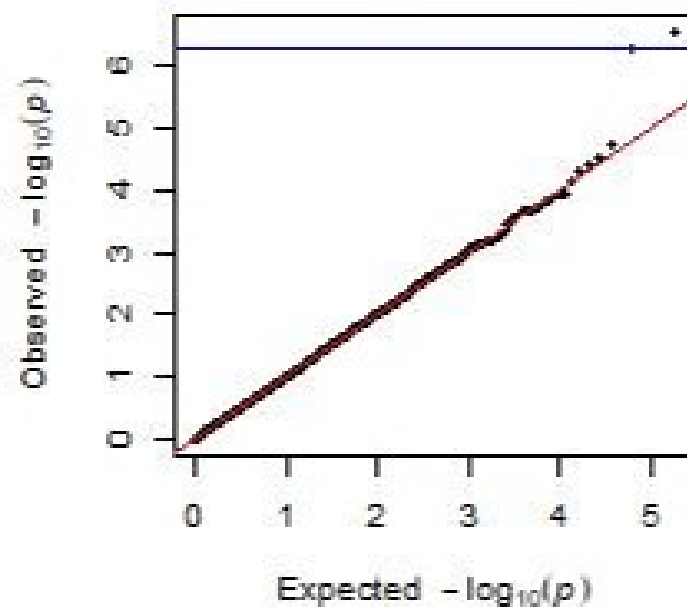

Accounting for kinship and structure

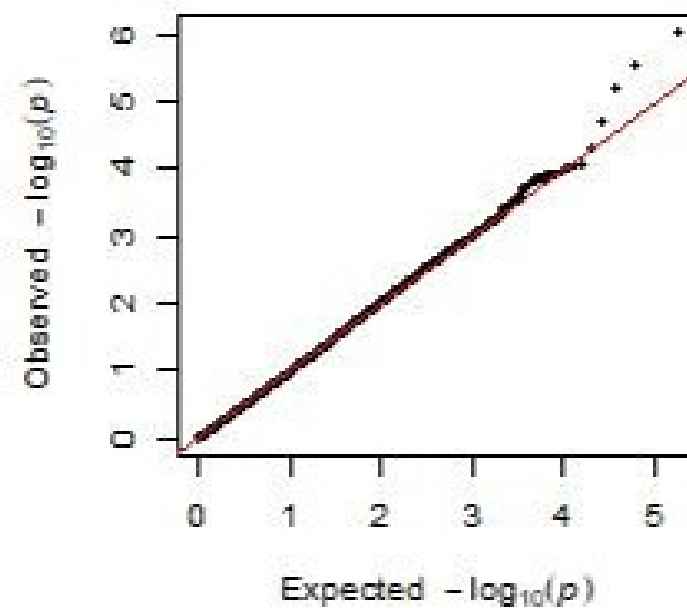

# trait: VAC\_po17

No accounting for kinship or structure

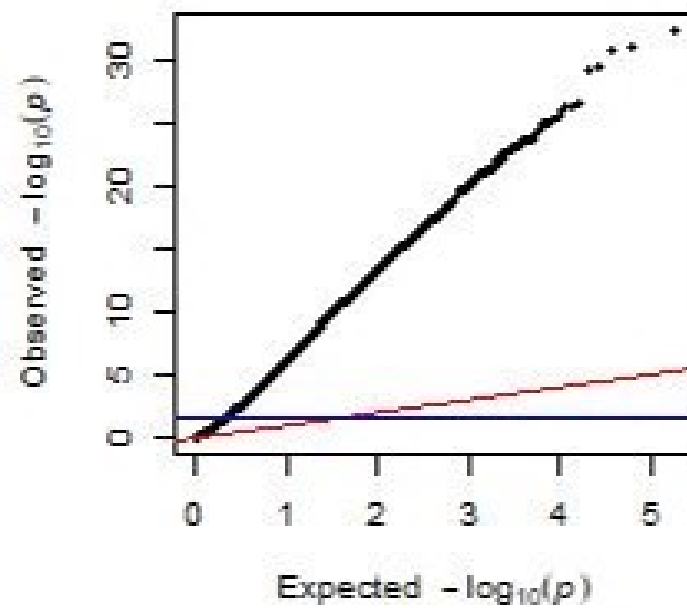

Accounting only for structure

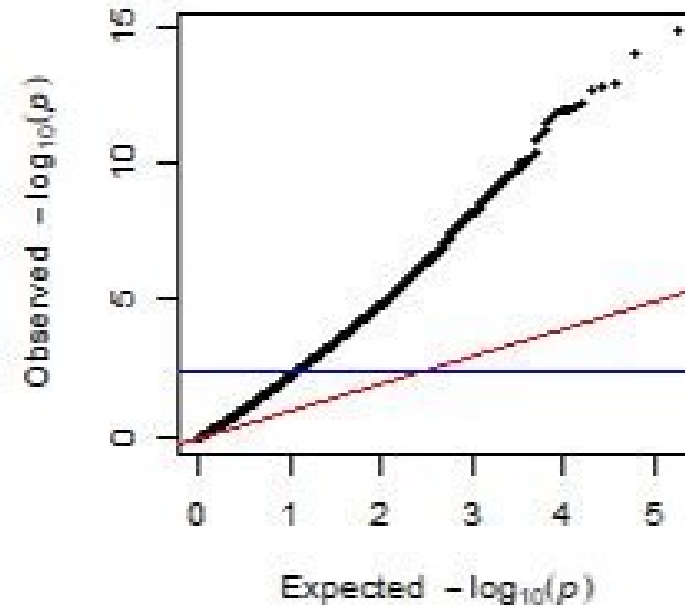

Accounting only for kinship

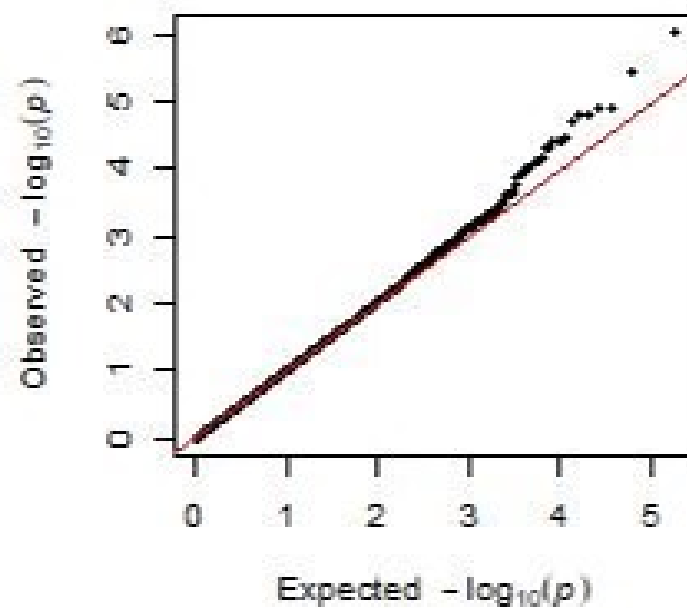

Accounting for kinship and structure

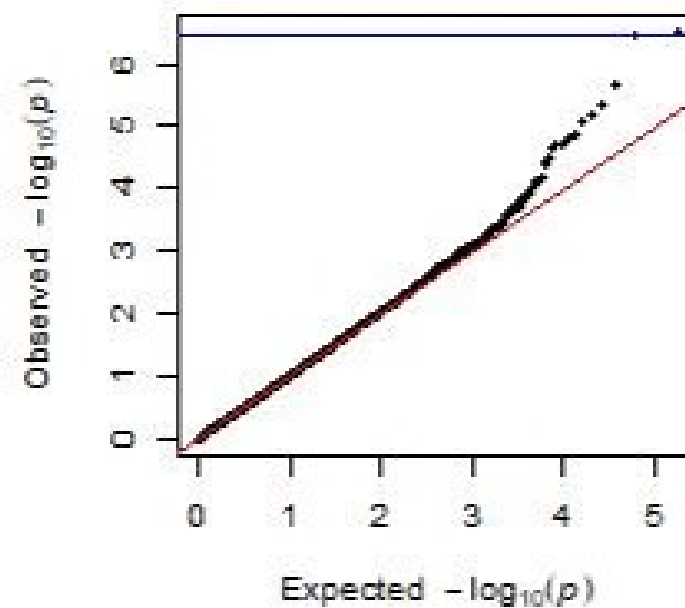



# trait: VAS\_avg

No accounting for kinship or structure

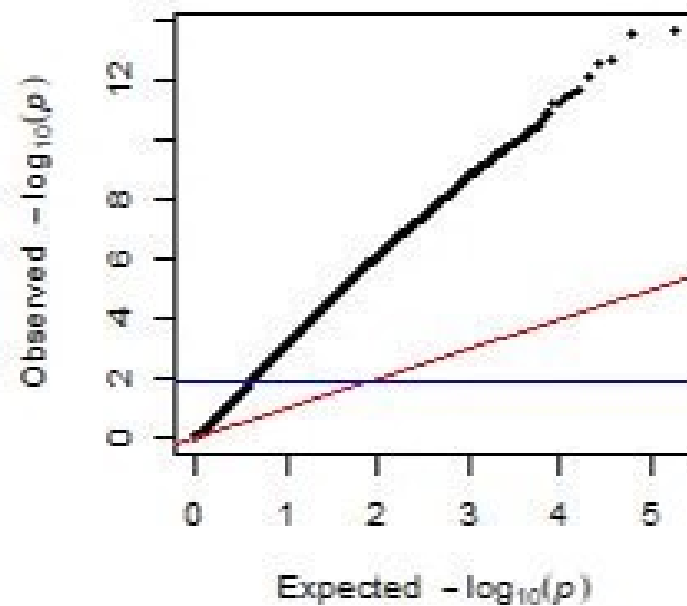

Accounting only for structure

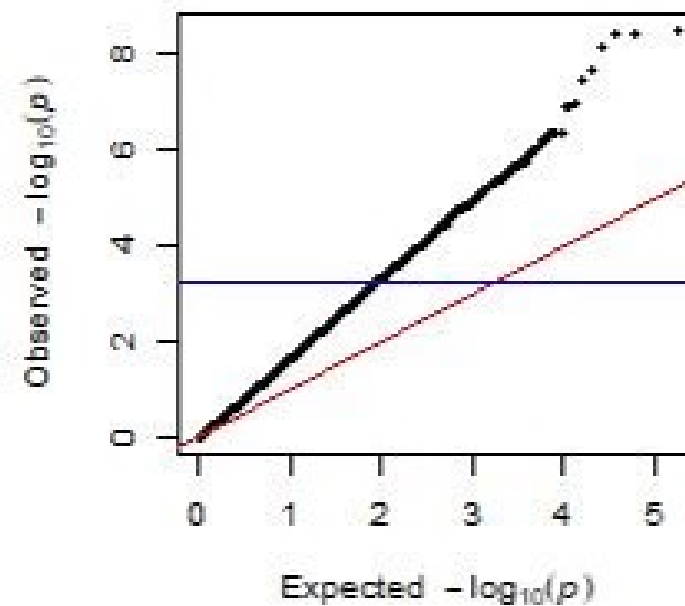

Accounting only for kinship

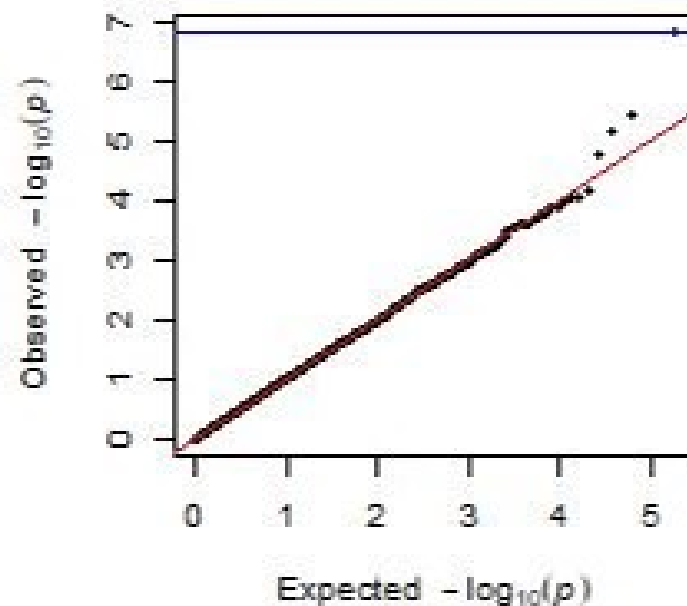

Accounting for kinship and structure

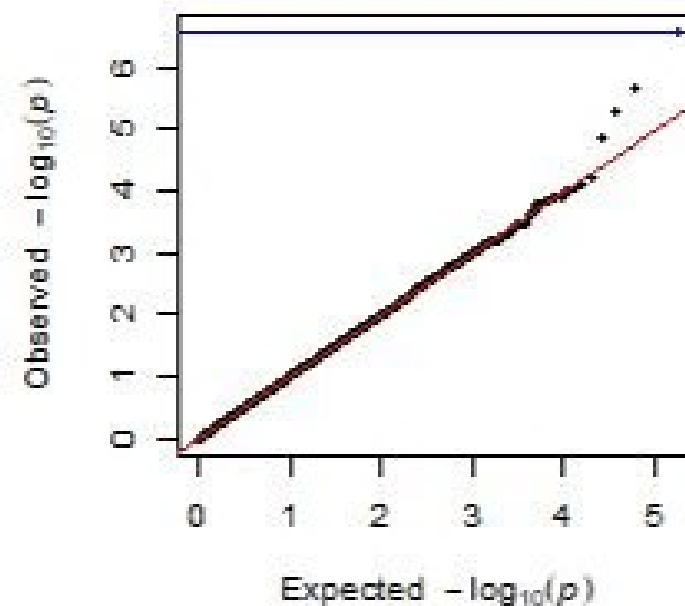

# trait: VAS\_lu15

No accounting for kinship or structure

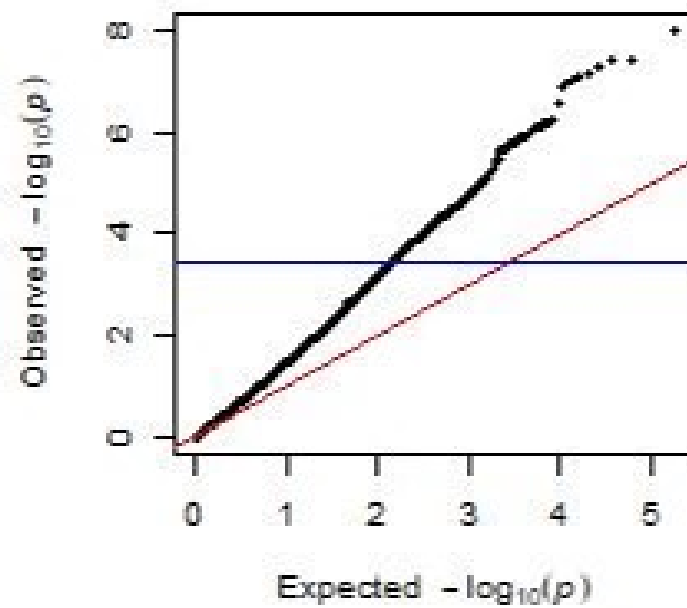

Accounting only for structure

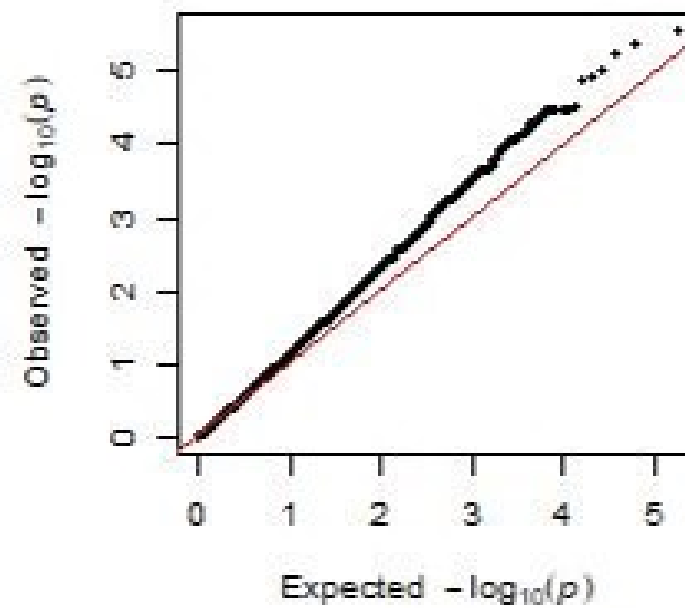

Accounting only for kinship

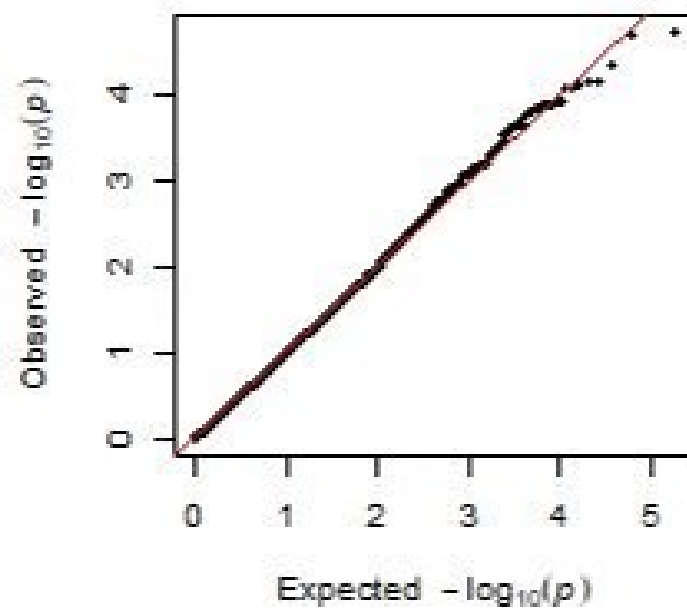

Accounting for kinship and structure

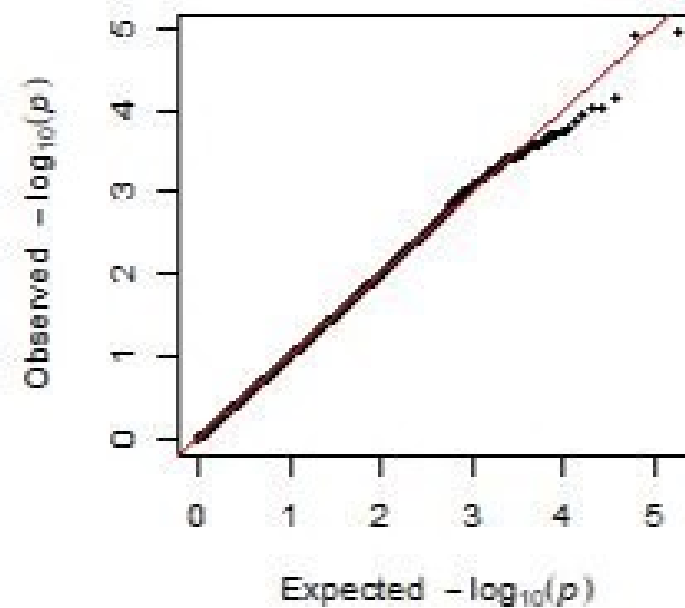

# trait: VAS\_me15

No accounting for kinship or structure

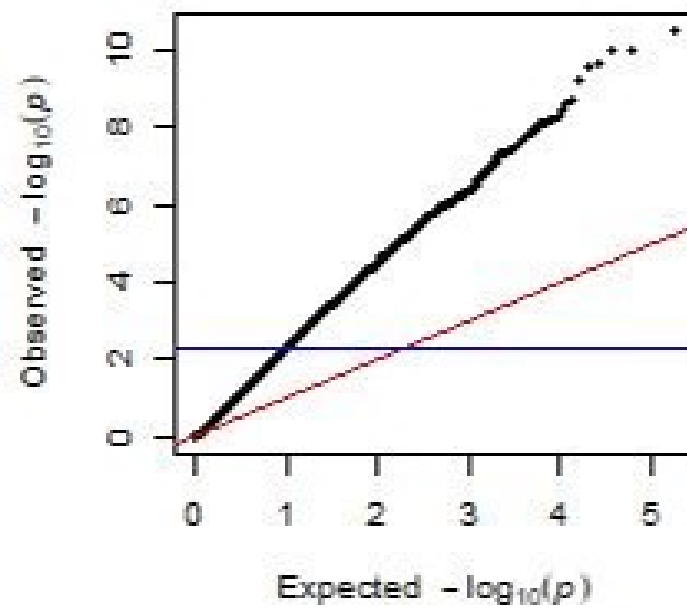

Accounting only for structure

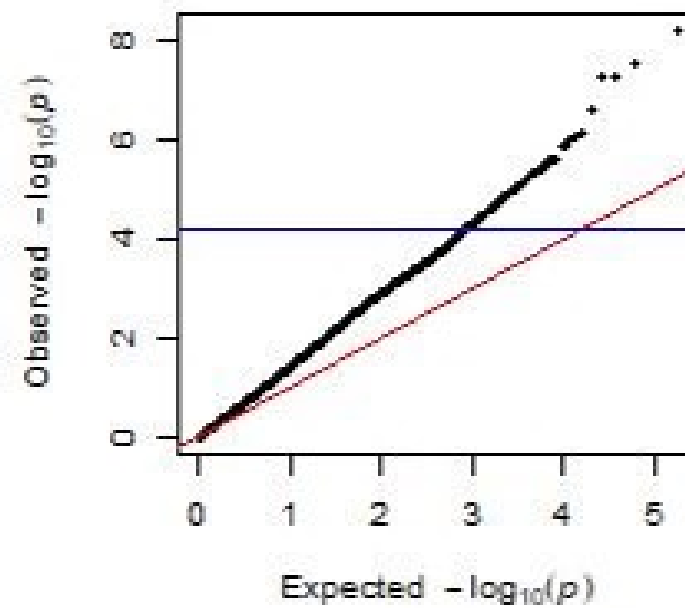

Accounting only for kinship

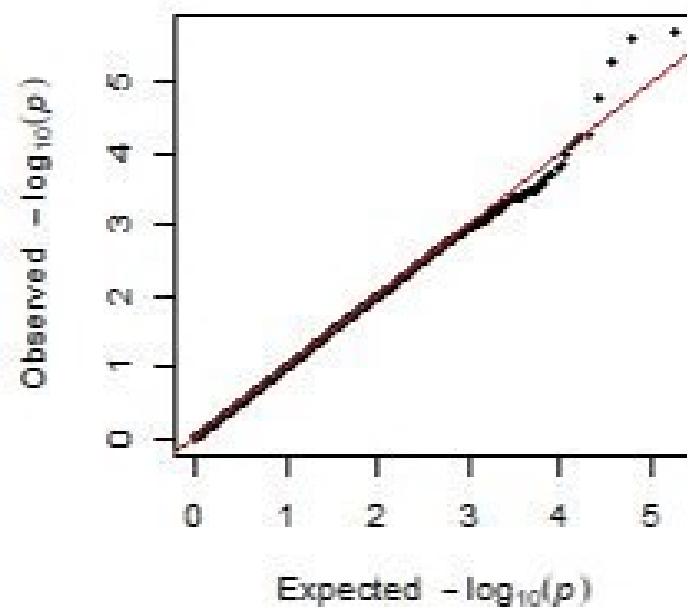

Accounting for kinship and structure

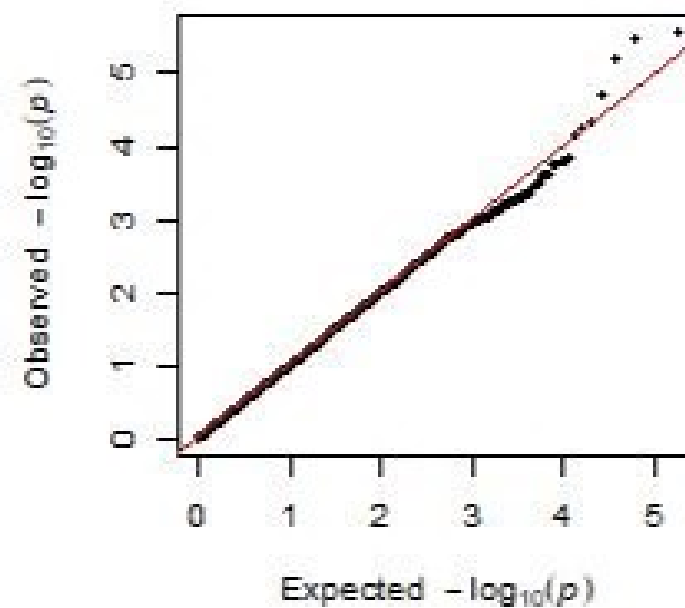

# trait: VAS\_po15

No accounting for kinship or structure

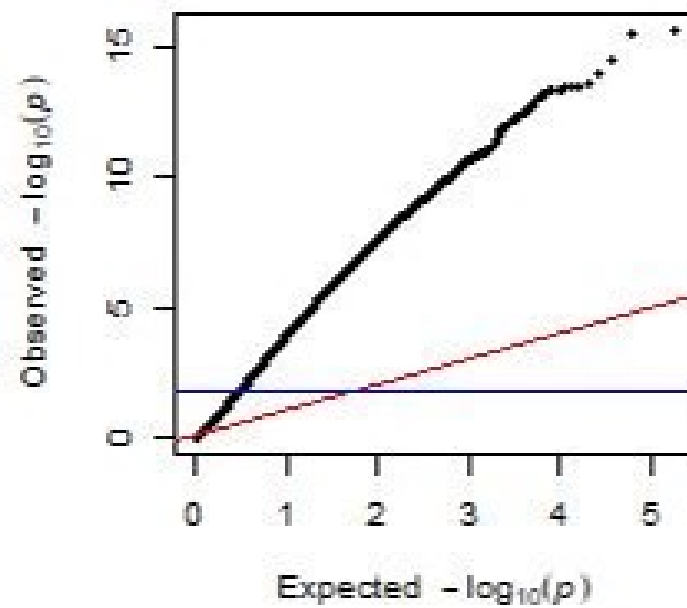

Accounting only for structure

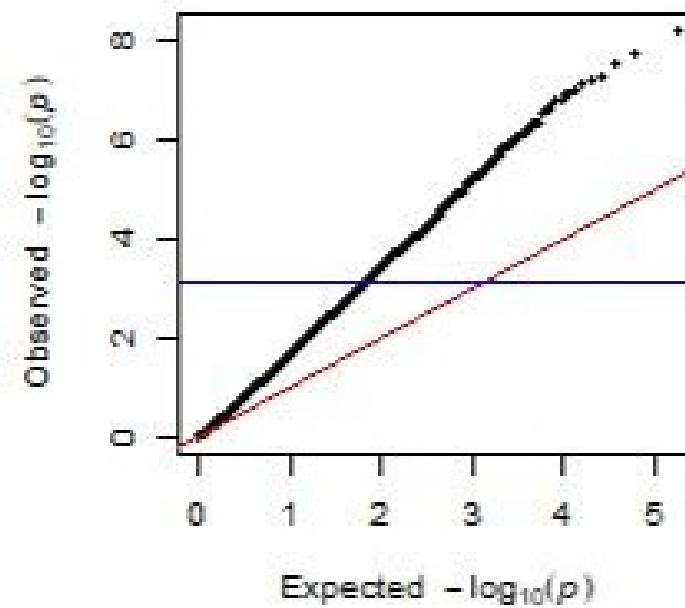

Accounting only for kinship

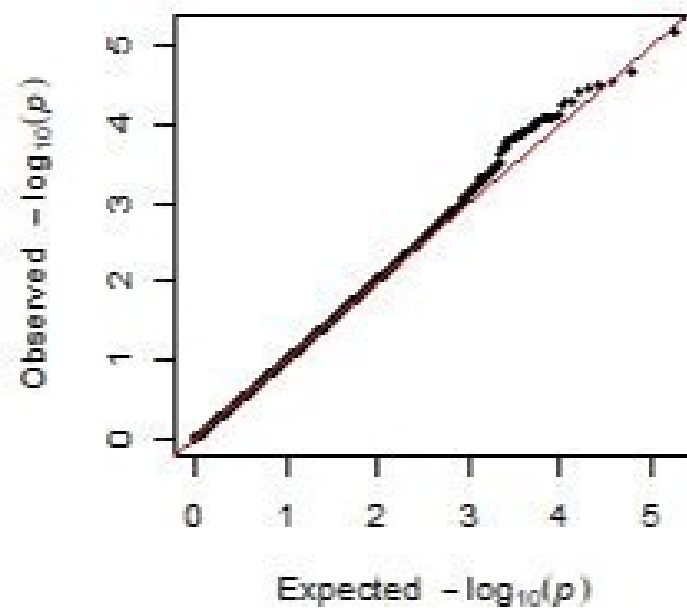

Accounting for kinship and structure

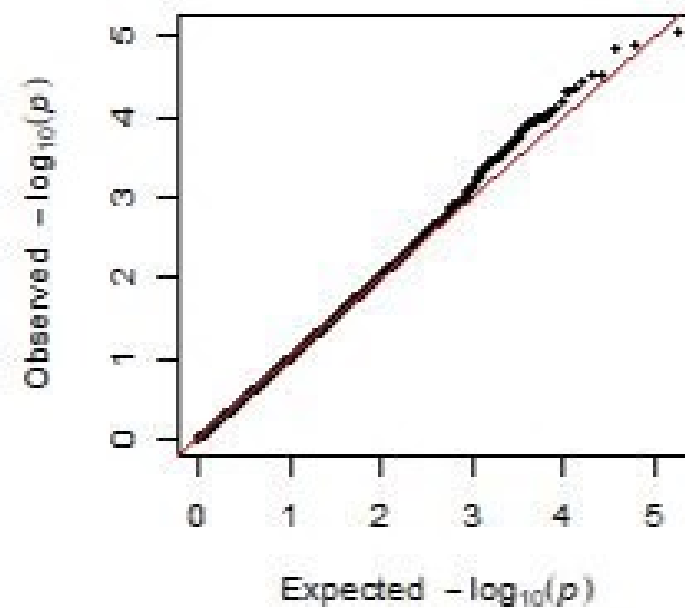

# trait: WID\_po16

No accounting for kinship or structure

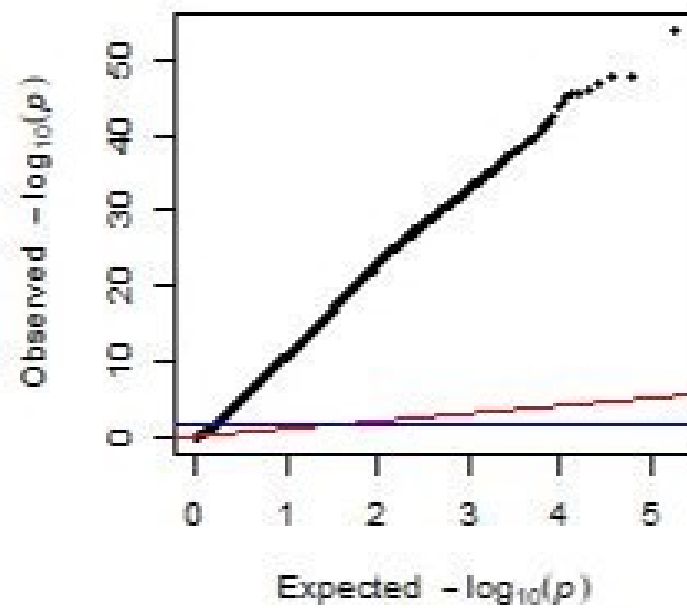

Accounting only for structure

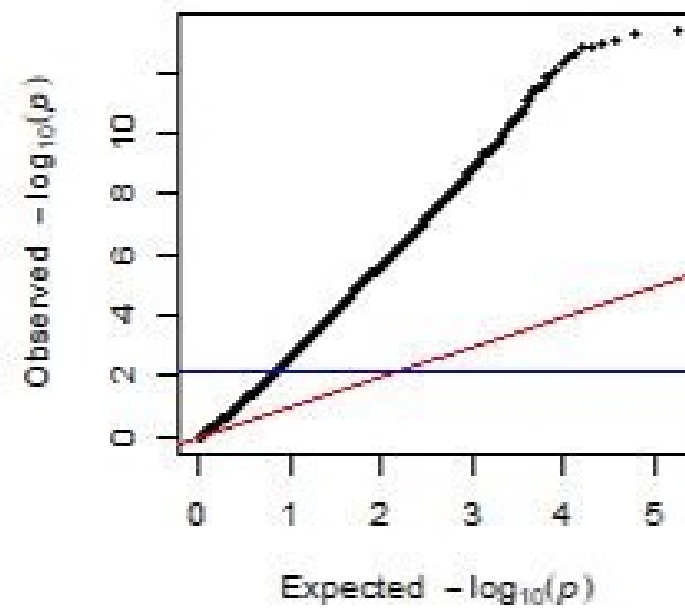

Accounting only for kinship

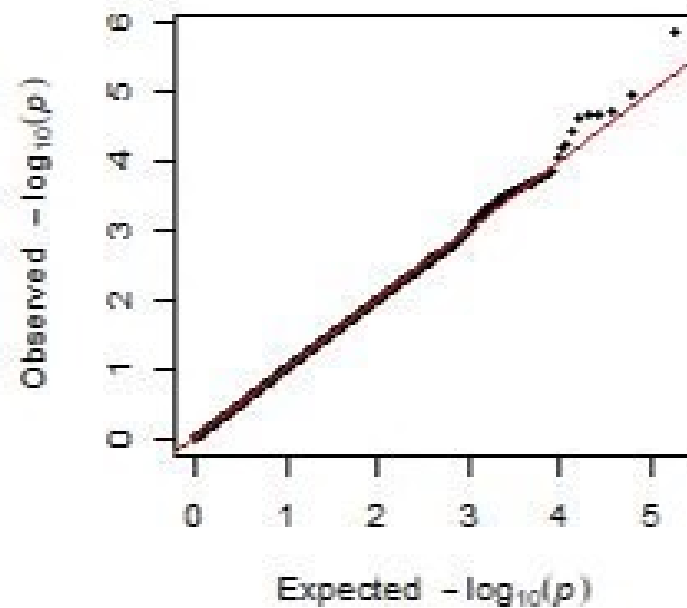

Accounting for kinship and structure

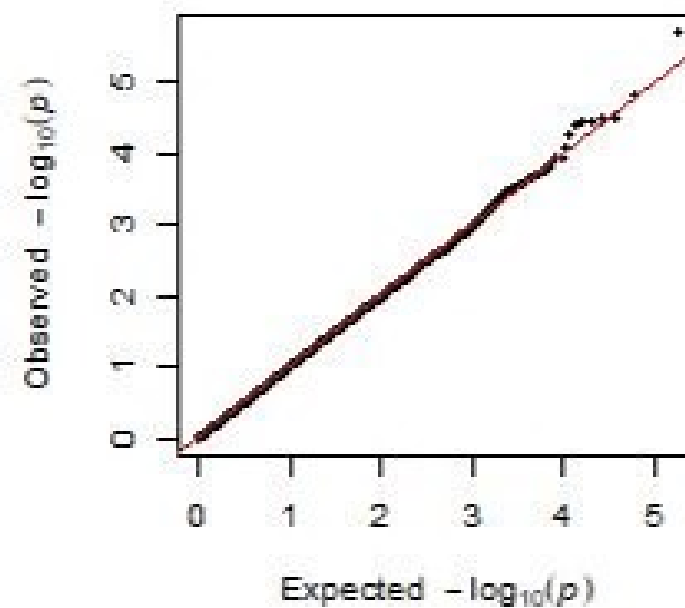

# trait: WID\_po17

No accounting for kinship or structure

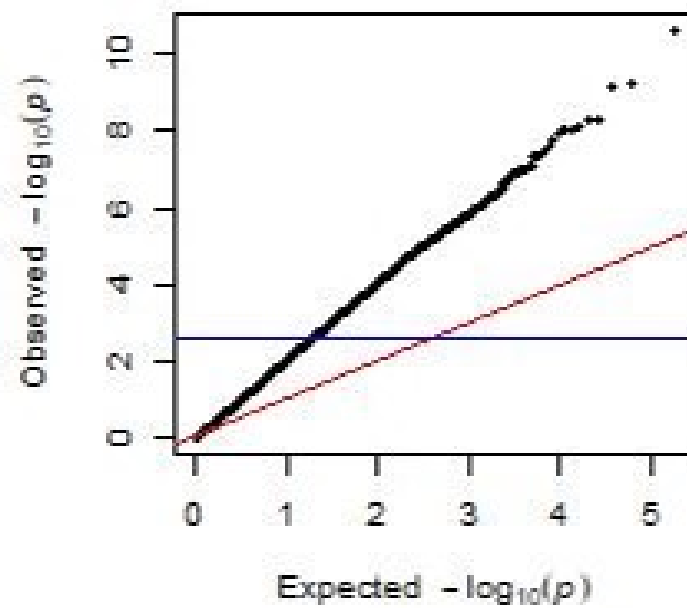

Accounting only for structure

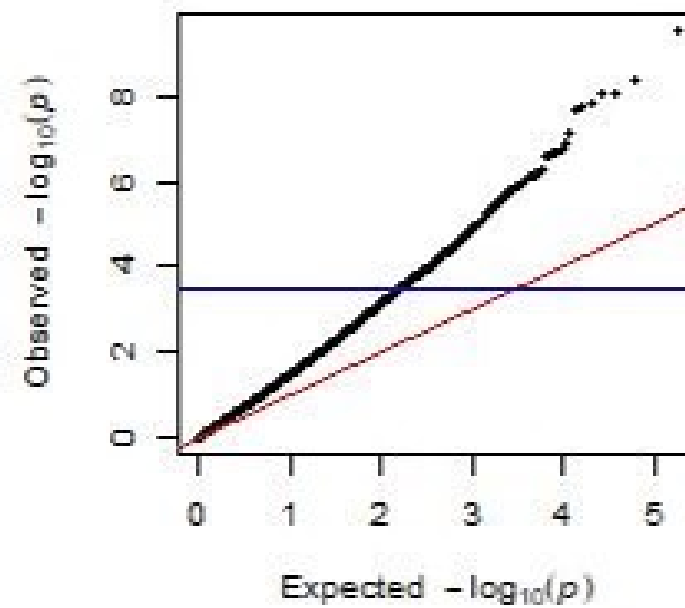

Accounting only for kinship

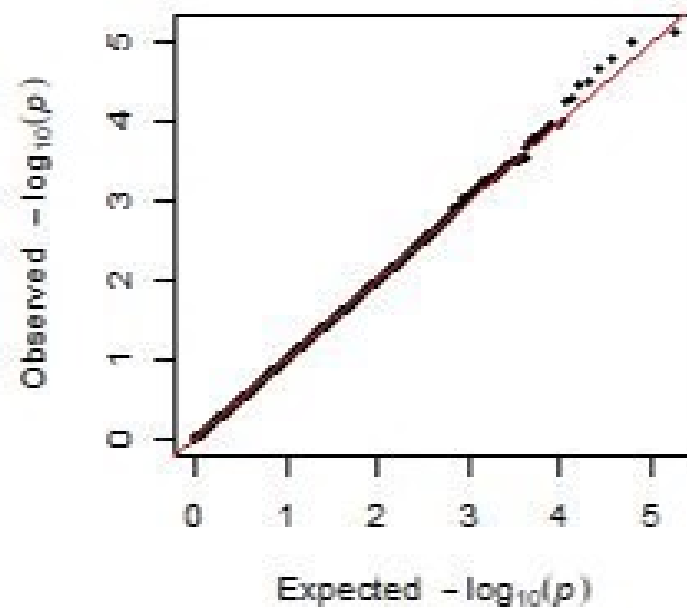

Accounting for kinship and structure

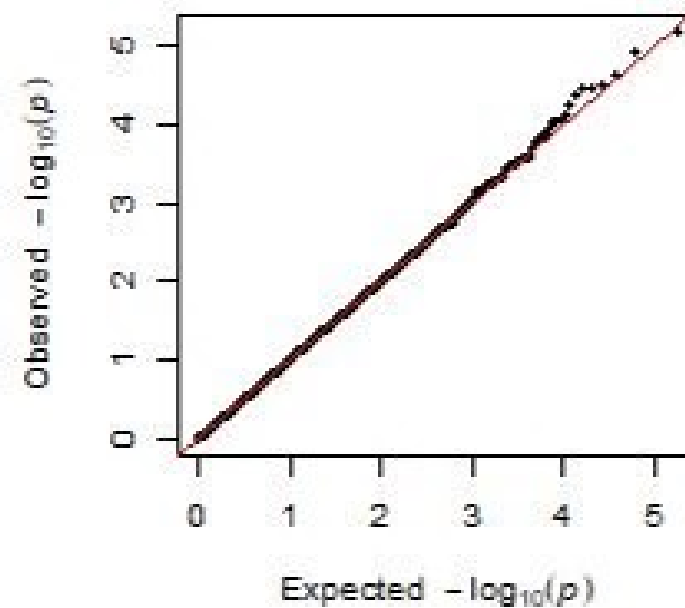

# trait: WSC\_04\_me17

No accounting for kinship or structure

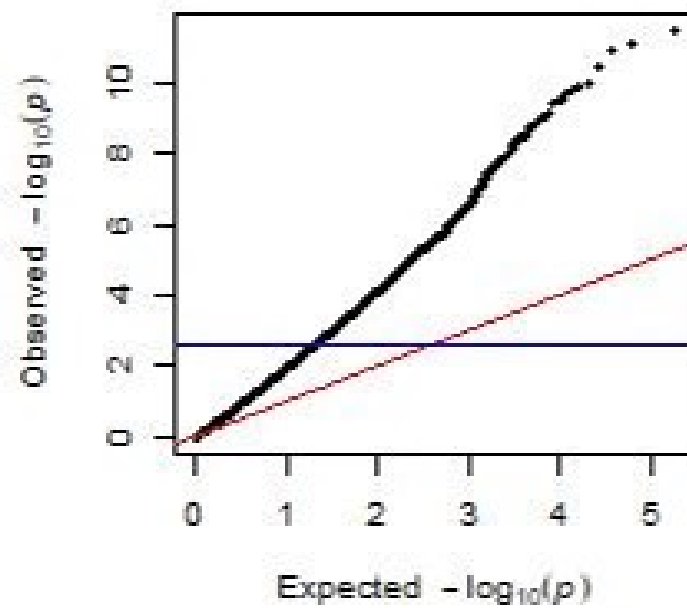

Accounting only for structure

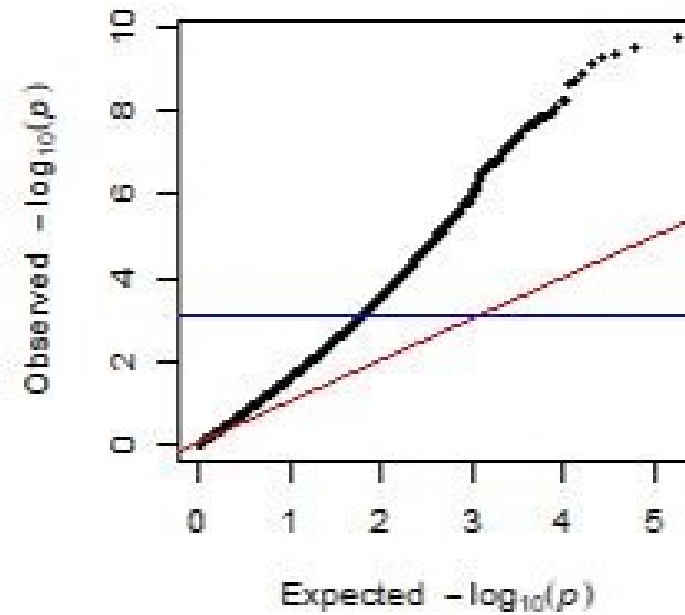

Accounting only for kinship

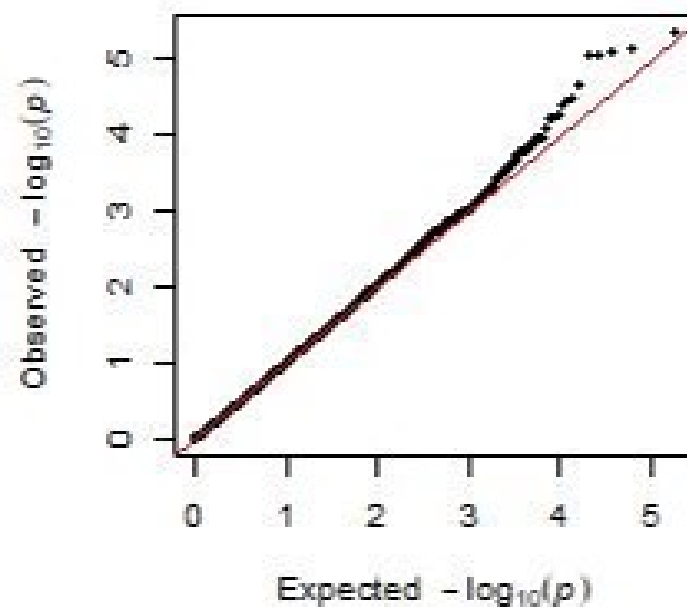

Accounting for kinship and structure

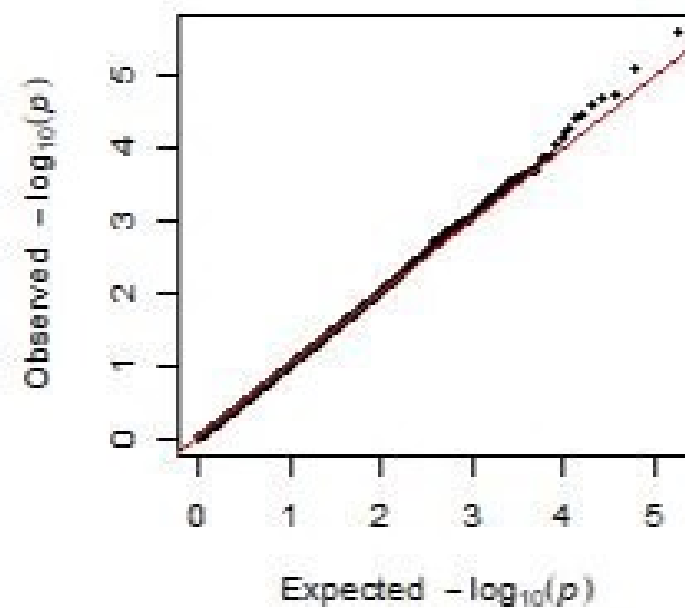

# trait: WSC\_10\_me17

No accounting for kinship or structure

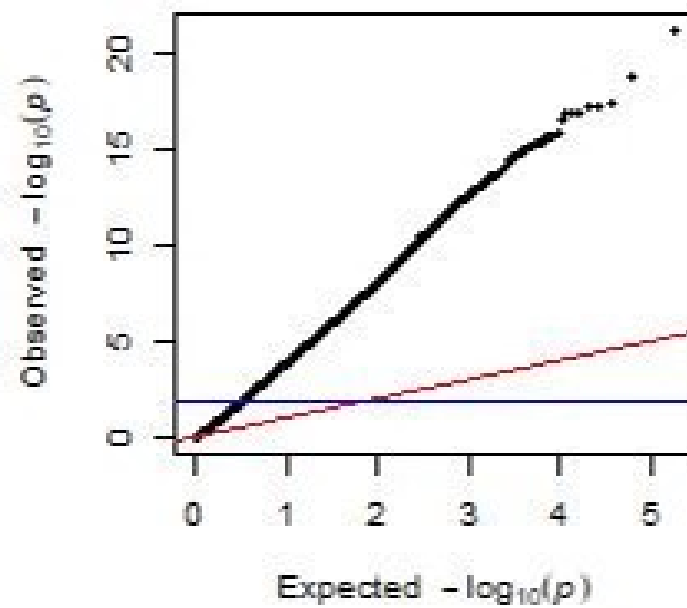

Accounting only for structure

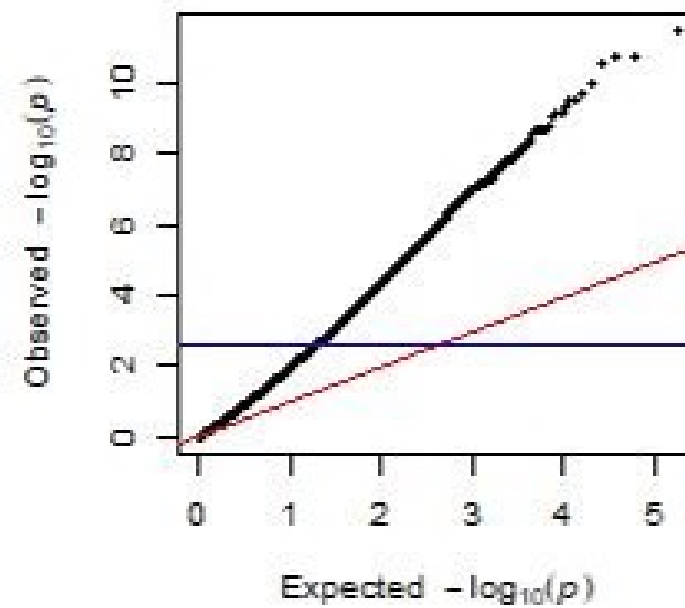

Accounting only for kinship

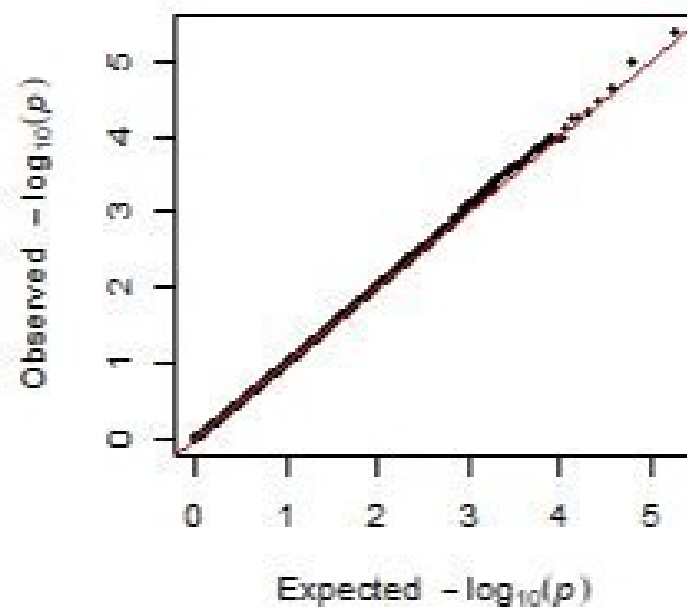

Accounting for kinship and structure

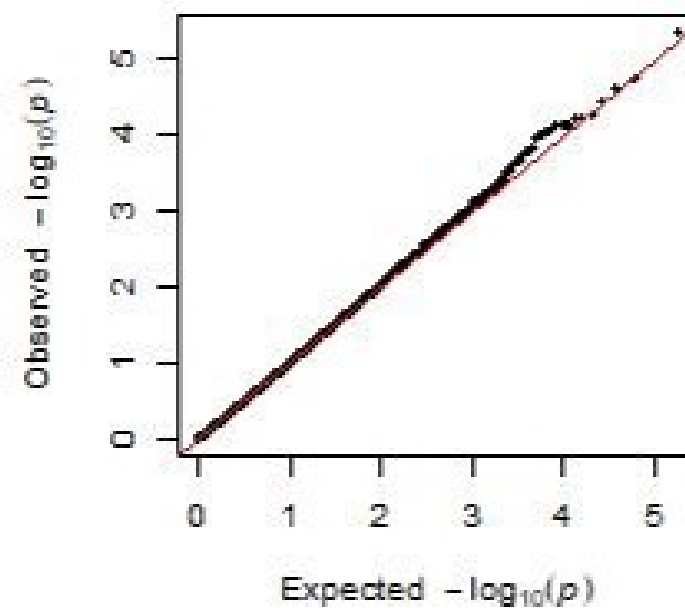



# trait: WSC\_avg

No accounting for kinship or structure

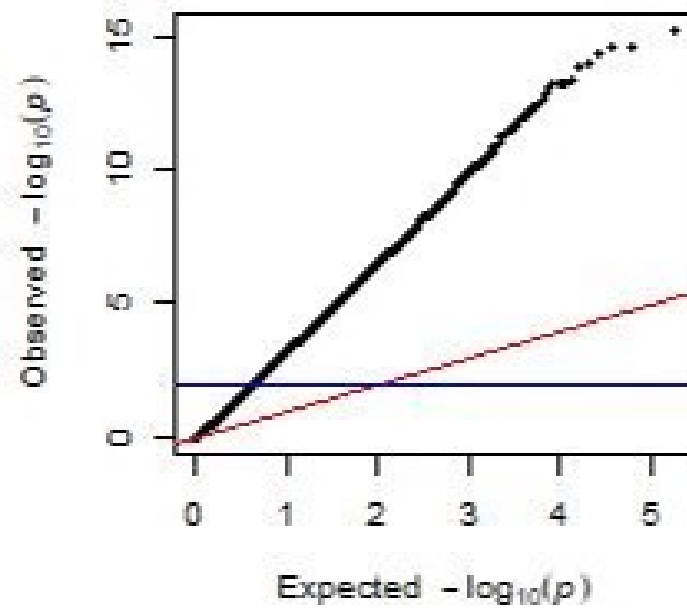

Accounting only for structure

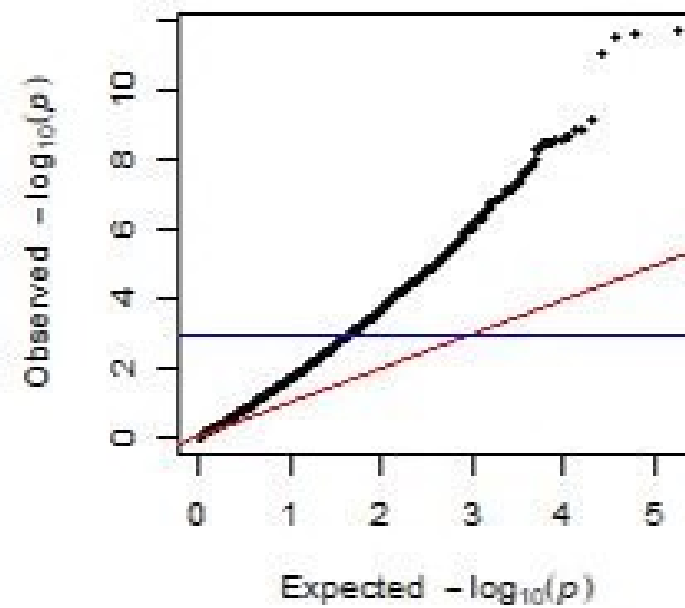

Accounting only for kinship

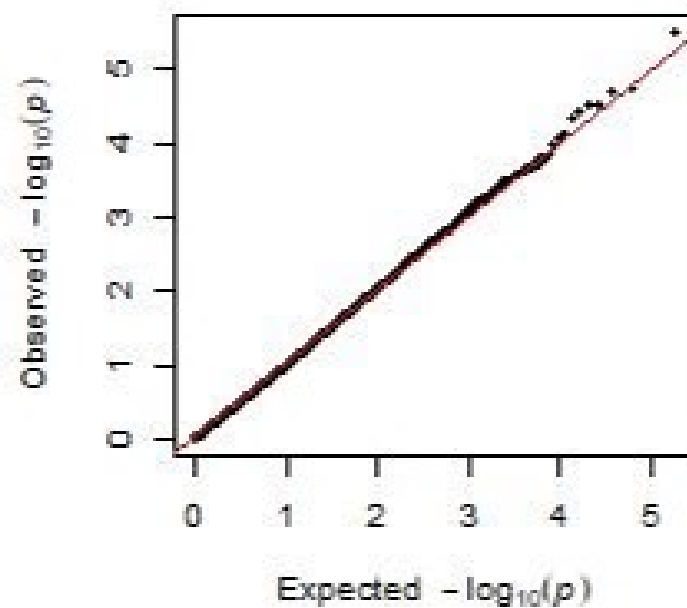

Accounting for kinship and structure

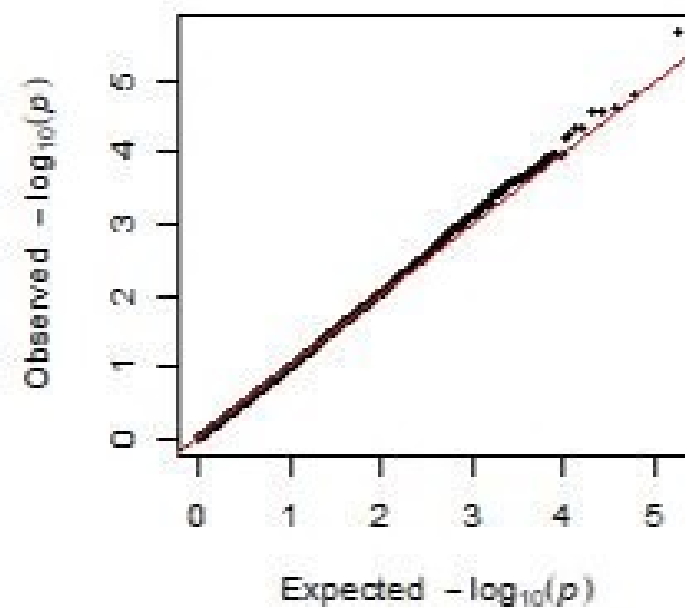

# trait: X.13C\_lu16

No accounting for kinship or structure

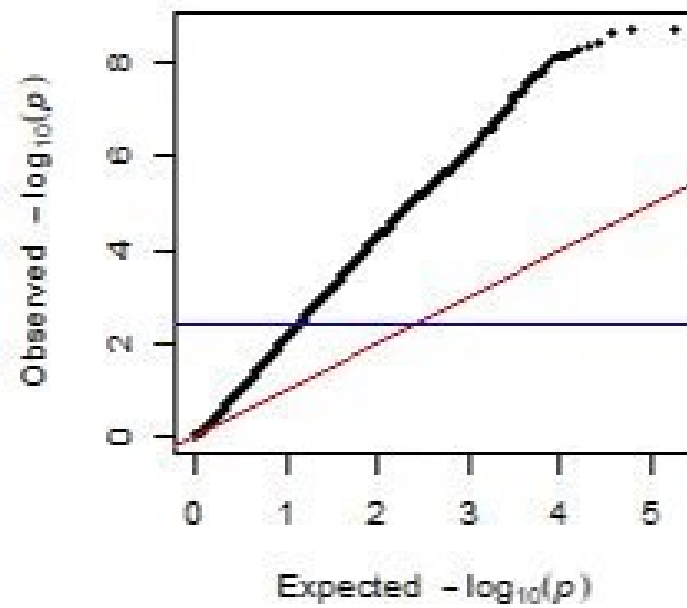

Accounting only for structure

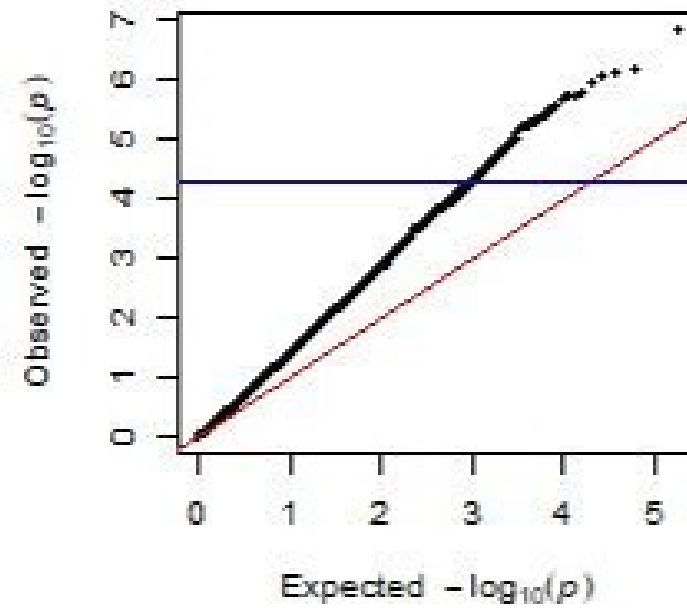

Accounting only for kinship

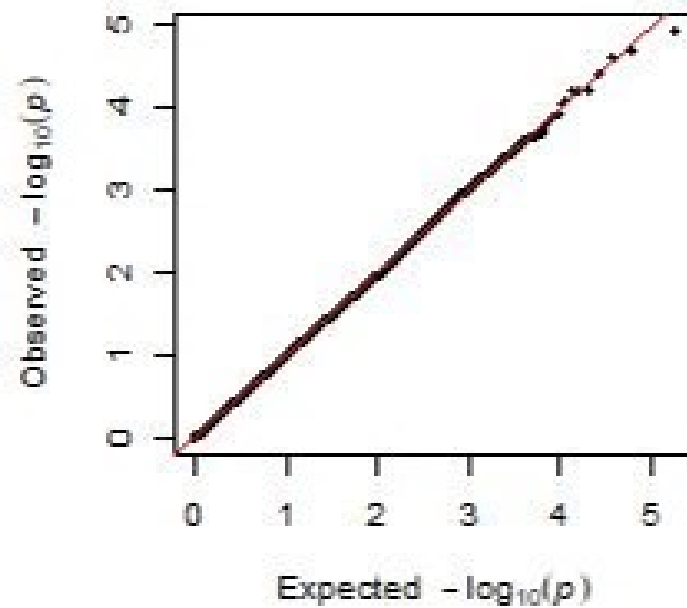

Accounting for kinship and structure

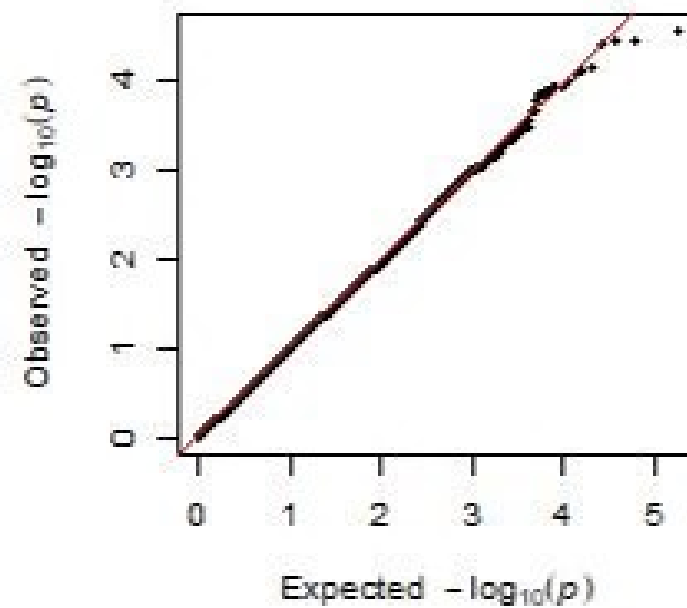

Supplement: Supplementary file 1 [file 23204444]
